# Supplementary material for: Lineage Memory and Convergent Adaptation Dictate the Single-Cell and Spatial Architecture of Brain Malignancies
Source: bioRxiv preprint, doi:10.64898/2026.06.15.732237, version 1 (2026-06-16)
Supplement: Table S2 [file 732237_file04.xlsx]

## Sheet: Stroma
Table S2. Differentially Expressed Genes (DEGs) for All Cell Subpopulations
celltype	gene	p_val	avg_log2FC	pct.1	pct.2	p_val_adj
FB.01.PDGFRA	CEMIP	0	#NUM!	0.491	0.104	0
FB.01.PDGFRA	ZNF91	2.4182e-128	#NUM!	0.439	0.193	8.30145e-124
FB.01.PDGFRA	LINC01088	0	869.65	0.253	0.018	0
FB.01.PDGFRA	PCSK5	1.05863e-266	624.953	0.53	0.189	3.63418e-262
FB.01.PDGFRA	HSP90B1	1.40595e-65	594.657	0.437	0.6	4.82649e-61
FB.01.PDGFRA	ESYT2	1.49352e-160	567.245	0.566	0.293	5.1271e-156
FB.01.PDGFRA	RORA	0	495.111	0.905	0.481	0
FB.01.PDGFRA	TRPS1	2.46327e-227	494.637	0.632	0.318	8.45616e-223
FB.01.PDGFRA	TACC1	1.43298e-41	467.933	0.677	0.54	4.91927e-37
FB.01.PDGFRA	COL11A1	0	465.559	0.747	0.124	0
FB.01.PDGFRA	KATNBL1	3.68789e-43	451.557	0.378	0.231	1.26602e-38
FB.01.PDGFRA	LUC7L3	1.02564e-123	384.023	0.693	0.449	3.52092e-119
FB.01.PDGFRA	GMDS	5.66481e-55	376.604	0.506	0.36	1.94467e-50
FB.01.PDGFRA	PAPPA	0	358.344	0.46	0.079	0
FB.01.PDGFRA	SAMD4A	0	354.95	0.577	0.197	0
FB.01.PDGFRA	ARHGAP21	1.59973e-228	353.727	0.594	0.271	5.49173e-224
FB.01.PDGFRA	FBN1	0	353.157	0.816	0.347	0
FB.01.PDGFRA	ITGBL1	0	337.42	0.585	0.143	0
FB.01.PDGFRA	CNOT2	4.61205e-78	332.086	0.534	0.326	1.58327e-73
FB.01.PDGFRA	NEAT1	0	312.268	0.941	0.702	0
FB.01.PDGFRA	NFKB1	5.73409e-54	303.184	0.396	0.24	1.96846e-49
FB.01.PDGFRA	SP100	4.35751e-52	290.248	0.605	0.445	1.49589e-47
FB.01.PDGFRA	LAMA2	0	285.483	0.84	0.434	0
FB.01.PDGFRA	CRISPLD2	4.26381e-33	281.524	0.403	0.282	1.46372e-28
FB.01.PDGFRA	TIMP3	0.138002	272.833	0.597	0.618	1
FB.01.PDGFRA	COL8A1	0	269.455	0.698	0.17	0
FB.01.PDGFRA	ELL2	9.67303e-204	261.368	0.6	0.296	3.32065e-199
FB.01.PDGFRA	MIR99AHG	0	245.036	0.728	0.372	0
FB.01.PDGFRA	ZFC3H1	1.6826e-253	238.784	0.571	0.219	5.77619e-249
FB.01.PDGFRA	SLC7A2	5.17139e-67	233.396	0.283	0.133	1.77529e-62
FB.01.PDGFRA	SKIL	2.92205e-176	229.655	0.491	0.216	1.00311e-171
FB.01.PDGFRA	WDR44	2.07613e-88	228.211	0.339	0.153	7.12715e-84
FB.01.PDGFRA	CACNA2D1	1.3479e-296	225.325	0.73	0.342	4.62719e-292
FB.01.PDGFRA	DLG2	0	223.663	0.636	0.164	0
FB.01.PDGFRA	DGKI	8.88347e-306	222.442	0.391	0.08	3.04961e-301
FB.01.PDGFRA	PDGFRA	0	213.553	0.599	0.056	0
FB.01.PDGFRA	KCNT2	1.57116e-233	212.971	0.64	0.306	5.39365e-229
FB.01.PDGFRA	FOXO1	0	207.734	0.618	0.128	0
FB.01.PDGFRA	OSMR	6.20385e-181	202.881	0.625	0.329	2.12972e-176
FB.01.PDGFRA	TNRC6A	2.77619e-167	200.801	0.659	0.367	9.53038e-163
FB.01.PDGFRA	PPP1CB	1.18368e-08	197.27	0.417	0.381	0.000406345
FB.01.PDGFRA	MIR100HG	0	194.762	0.83	0.198	0
FB.01.PDGFRA	PITPNC1	1.35055e-28	193.46	0.322	0.216	4.63629e-24
FB.01.PDGFRA	SON	3.34602e-25	190.684	0.689	0.577	1.14865e-20
FB.01.PDGFRA	CYTOR	3.69577e-35	187.365	0.482	0.565	1.26872e-30
FB.01.PDGFRA	PGAP1	9.85827e-76	183.297	0.316	0.149	3.38424e-71
FB.01.PDGFRA	CCN4	0	176.275	0.539	0.069	0
FB.01.PDGFRA	FOXO3	4.55021e-162	174.832	0.594	0.33	1.56204e-157
FB.01.PDGFRA	COL12A1	3.16062e-178	168.044	0.465	0.194	1.08501e-173
FB.01.PDGFRA	PID1	7.24481e-240	166.843	0.489	0.179	2.48707e-235
FB.01.PDGFRA	DDX5	9.91207e-29	164.734	0.805	0.736	3.40271e-24
FB.01.PDGFRA	ANKH	0	163.291	0.68	0.232	0
FB.01.PDGFRA	BACH2	2.0576e-194	163.077	0.251	0.048	7.06354e-190
FB.01.PDGFRA	JAK2	0	162.72	0.646	0.229	0
FB.01.PDGFRA	SGIP1	9.32994e-105	162.432	0.661	0.448	3.20287e-100
FB.01.PDGFRA	LHFPL6	1.43486e-75	162.261	0.783	0.649	4.92573e-71
FB.01.PDGFRA	FBXL7	0	161.845	0.771	0.335	0
FB.01.PDGFRA	LEF1	2.35334e-194	161.835	0.485	0.194	8.07877e-190
FB.01.PDGFRA	LEPR	1.07487e-101	161.778	0.279	0.106	3.68992e-97
FB.01.PDGFRA	NSRP1	2.70359e-56	158.891	0.49	0.319	9.28115e-52
FB.01.PDGFRA	FMNL2	0	158.254	0.694	0.135	0
FB.01.PDGFRA	KALRN	3.16781e-143	157.655	0.58	0.329	1.08748e-138
FB.01.PDGFRA	FBXO32	1.87623e-65	154.394	0.489	0.335	6.4409e-61
FB.01.PDGFRA	DCBLD2	1.26252e-132	153.599	0.543	0.289	4.3341e-128
FB.01.PDGFRA	UAP1	3.04516e-112	151.012	0.291	0.106	1.04537e-107
FB.01.PDGFRA	GAS7	0	149.002	0.44	0.041	0
FB.01.PDGFRA	SLC1A3	7.91266e-227	147.808	0.644	0.313	2.71634e-222
FB.01.PDGFRA	FTX	0	147.421	0.88	0.496	0
FB.01.PDGFRA	LRP1B	3.07561e-298	146.477	0.289	0.037	1.05583e-293
FB.01.PDGFRA	FOXP2	0	145.715	0.46	0.087	0
FB.01.PDGFRA	LAMB1	0	143.611	0.848	0.389	0
FB.01.PDGFRA	GRB10	5.96723e-216	143.066	0.405	0.123	2.04849e-211
FB.01.PDGFRA	THBS1	7.1555e-68	142.59	0.455	0.281	2.45641e-63
FB.01.PDGFRA	USP53	1.08504e-281	140.417	0.544	0.209	3.72484e-277
FB.01.PDGFRA	PLOD2	5.74477e-57	136.757	0.43	0.262	1.97212e-52
FB.01.PDGFRA	DYNLL1	2.46963e-295	135.88	0.099	0.515	8.47801e-291
FB.01.PDGFRA	RAPGEF2	7.25071e-06	135.88	0.464	0.385	0.24891
FB.01.PDGFRA	SMOC2	0.616699	135.88	0.347	0.346	1
FB.01.PDGFRA	ADAM22	0	135.03	0.608	0.067	0
FB.01.PDGFRA	WTAP	1.55725e-14	133.506	0.35	0.277	5.34589e-10
FB.01.PDGFRA	ADAM12	5.31096e-117	133.452	0.509	0.29	1.8232e-112
FB.01.PDGFRA	ALMS1	9.74803e-152	130.171	0.411	0.161	3.3464e-147
FB.01.PDGFRA	HMCN1	0	130.109	0.364	0.062	0
FB.01.PDGFRA	RASGRF2	0	130.109	0.563	0.148	0
FB.01.PDGFRA	TGFBR1	5.22128e-134	128.997	0.389	0.157	1.79241e-129
FB.01.PDGFRA	FNDC3B	1.82954e-174	127.967	0.717	0.464	6.28062e-170
FB.01.PDGFRA	CMSS1	4.73436e-169	127.512	0.464	0.201	1.62526e-164
FB.01.PDGFRA	RASAL2	1.79851e-263	126.283	0.83	0.504	6.17412e-259
FB.01.PDGFRA	PIGN	1.435e-78	125.781	0.296	0.133	4.92621e-74
FB.01.PDGFRA	SIK2	2.2101e-125	125.755	0.555	0.306	7.58705e-121
FB.01.PDGFRA	DPYD	0	124.719	0.769	0.228	0
FB.01.PDGFRA	BICC1	0	124.467	0.832	0.212	0
FB.01.PDGFRA	NRIP1	6.35092e-220	123.231	0.594	0.269	2.18021e-215
FB.01.PDGFRA	UBL5	3.58557e-213	122.825	0.053	0.388	1.23089e-208
FB.01.PDGFRA	NEGR1	0	121.453	0.378	0.021	0
FB.01.PDGFRA	ENPP1	7.76428e-211	120.846	0.283	0.057	2.6654e-206
FB.01.PDGFRA	CCNH	1.02292e-90	120.01	0.492	0.283	3.51159e-86
FB.01.PDGFRA	EYA2	0	119.38	0.322	0.021	0
FB.01.PDGFRA	CYP7B1	8.94031e-147	118.889	0.509	0.25	3.06912e-142
FB.01.PDGFRA	NFIB	5.25507e-17	118.257	0.36	0.279	1.80401e-12
FB.01.PDGFRA	ANTXR2	0	117.806	0.592	0.206	0
FB.01.PDGFRA	FOXP1	1.29031e-262	117.089	0.845	0.58	4.42951e-258
FB.01.PDGFRA	CHST11	8.11373e-108	115.682	0.531	0.322	2.78536e-103
FB.01.PDGFRA	GRAMD2B	2.10287e-195	115.319	0.661	0.356	7.21893e-191
FB.01.PDGFRA	BNC2	0	115.203	0.771	0.075	0
FB.01.PDGFRA	ELF1	5.82033e-153	114.213	0.557	0.289	1.99806e-148
FB.01.PDGFRA	HSPB1	9.32241e-267	112.797	0.219	0.613	3.20029e-262
FB.01.PDGFRA	MAGI2	0	112.794	0.702	0.262	0
FB.01.PDGFRA	RNF19A	2.30432e-30	111.787	0.313	0.207	7.91051e-26
FB.01.PDGFRA	CHSY1	1.19631e-69	111.742	0.421	0.245	4.10682e-65
FB.01.PDGFRA	SAFB2	9.39041e-52	110.738	0.328	0.18	3.22364e-47
FB.01.PDGFRA	DIRC3	2.55175e-61	108.469	0.313	0.158	8.7599e-57
FB.01.PDGFRA	LHFPL2	4.52798e-176	108.458	0.482	0.207	1.55441e-171
FB.01.PDGFRA	ITGA8	0	108.006	0.451	0.109	0
FB.01.PDGFRA	NTRK3	0	107.508	0.489	0.136	0
FB.01.PDGFRA	TNFAIP3	2.40047e-59	107.405	0.279	0.145	8.24058e-55
FB.01.PDGFRA	AMOTL1	2.16441e-220	107.026	0.568	0.25	7.43022e-216
FB.01.PDGFRA	TENM4	0	106.272	0.661	0.058	0
FB.01.PDGFRA	FAM155A	8.94643e-307	105.572	0.25	0.021	3.07122e-302
FB.01.PDGFRA	SLC20A1	1.26062e-298	104.962	0.531	0.174	4.3276e-294
FB.01.PDGFRA	FCHSD2	3.3305e-194	101.484	0.623	0.305	1.14333e-189
FB.01.PDGFRA	PDLIM5	1.32688e-63	101.255	0.602	0.453	4.55504e-59
FB.01.PDGFRA	TRIO	0	101.255	0.858	0.463	0
FB.01.PDGFRA	ZSWIM6	3.85399e-126	100.599	0.573	0.307	1.32304e-121
FB.01.PDGFRA	COL4A3	9.2366e-157	100.477	0.282	0.079	3.17083e-152
FB.01.PDGFRA	THSD4	0	99.8125	0.623	0.078	0
FB.01.PDGFRA	ABCA10	0	99.5164	0.387	0.051	0
FB.01.PDGFRA	PDE1A	1.05466e-96	99.4377	0.51	0.286	3.62053e-92
FB.01.PDGFRA	PKNOX2	2.82002e-205	99.0864	0.257	0.047	9.68086e-201
FB.01.PDGFRA	PSME4	5.21062e-88	98.5974	0.42	0.223	1.78875e-83
FB.01.PDGFRA	OSBPL8	5.25206e-127	98.4697	0.638	0.42	1.80298e-122
FB.01.PDGFRA	NAV2	0	98.0696	0.663	0.204	0
FB.01.PDGFRA	ATP1B3	0.0406676	96.9271	0.339	0.375	1
FB.01.PDGFRA	PDZRN3	0	96.4752	0.623	0.17	0
FB.01.PDGFRA	ZFPM2	0	95.4844	0.729	0.32	0
FB.01.PDGFRA	IMMP2L	1.50748e-42	95.4143	0.522	0.377	5.17502e-38
FB.01.PDGFRA	TMEM132C	0	95.3742	0.336	0.014	0
FB.01.PDGFRA	SEPTIN11	2.79161e-45	94.0416	0.644	0.514	9.58332e-41
FB.01.PDGFRA	RBMS1	2.62254e-203	93.6074	0.794	0.536	9.00293e-199
FB.01.PDGFRA	AFF3	3.50694e-130	92.599	0.266	0.083	1.2039e-125
FB.01.PDGFRA	KIF26B	2.47064e-144	92.599	0.319	0.107	8.48145e-140
FB.01.PDGFRA	AKAP12	3.95467e-35	92.599	0.467	0.36	1.3576e-30
FB.01.PDGFRA	COL4A4	2.21397e-93	92.5527	0.328	0.152	7.60032e-89
FB.01.PDGFRA	TSC22D2	3.38017e-24	92.395	0.333	0.234	1.16038e-19
FB.01.PDGFRA	NAV3	7.25158e-252	92.1461	0.5	0.167	2.48939e-247
FB.01.PDGFRA	THBS2	0	91.1565	0.702	0.172	0
FB.01.PDGFRA	TAF1D	4.24547e-114	91.1549	0.503	0.265	1.45743e-109
FB.01.PDGFRA	ATXN3	3.81768e-32	90.7038	0.282	0.17	1.31057e-27
FB.01.PDGFRA	LMCD1	6.18592e-117	90.4774	0.327	0.133	2.12357e-112
FB.01.PDGFRA	CDH13	4.96663e-35	89.7123	0.273	0.168	1.70499e-30
FB.01.PDGFRA	TLE1	0.000457174	89.7098	0.257	0.293	1
FB.01.PDGFRA	EDIL3	4.16392e-06	89.7098	0.512	0.476	0.142943
FB.01.PDGFRA	MRTFA	6.6361e-186	89.138	0.624	0.315	2.27811e-181
FB.01.PDGFRA	SEMA3C	2.04102e-271	88.6697	0.465	0.14	7.00663e-267
FB.01.PDGFRA	RNF217	1.24076e-287	88.5227	0.507	0.157	4.25942e-283
FB.01.PDGFRA	LAMA4	2.63525e-64	87.9489	0.729	0.596	9.04653e-60
FB.01.PDGFRA	DPYSL3	5.1984e-298	87.0114	0.505	0.15	1.78456e-293
FB.01.PDGFRA	NAMPT	1.78878e-52	86.8282	0.353	0.214	6.14072e-48
FB.01.PDGFRA	HIVEP1	8.59366e-67	86.8185	0.29	0.14	2.95012e-62
FB.01.PDGFRA	RPS6KA2	2.37979e-179	86.7494	0.433	0.164	8.16957e-175
FB.01.PDGFRA	IFT122	1.15944e-159	86.5953	0.275	0.07	3.98024e-155
FB.01.PDGFRA	RUNX2	0	85.9102	0.569	0.192	0
FB.01.PDGFRA	WAPL	1.37076e-37	85.0834	0.377	0.239	4.70567e-33
FB.01.PDGFRA	ABI3BP	7.62231e-291	84.7563	0.272	0.031	2.61666e-286
FB.01.PDGFRA	RBMS3	2.20374e-286	84.2259	0.881	0.573	7.5652e-282
FB.01.PDGFRA	SORBS1	0	83.6673	0.602	0.193	0
FB.01.PDGFRA	UBR5	2.06632e-83	83.2439	0.542	0.338	7.09346e-79
FB.01.PDGFRA	CPD	1.12055e-172	83.2376	0.424	0.165	3.84672e-168
FB.01.PDGFRA	AKAP9	2.5637e-97	83.2343	0.572	0.356	8.80093e-93
FB.01.PDGFRA	NFIA	1.67542e-185	82.784	0.728	0.468	5.75155e-181
FB.01.PDGFRA	GLIS3	0	82.7833	0.666	0.186	0
FB.01.PDGFRA	USP54	8.01505e-131	82.4895	0.293	0.096	2.75149e-126
FB.01.PDGFRA	RAPGEF5	4.51902e-21	82.2745	0.357	0.271	1.55133e-16
FB.01.PDGFRA	AKAP13	1.21557e-262	81.9627	0.827	0.565	4.17294e-258
FB.01.PDGFRA	SULF1	0	81.2472	0.597	0.221	0
FB.01.PDGFRA	MBNL1	9.10363e-109	81.0575	0.652	0.458	3.12519e-104
FB.01.PDGFRA	PRKAG2	7.9528e-109	81.0574	0.255	0.086	2.73012e-104
FB.01.PDGFRA	JAM3	2.78112e-109	81.057	0.402	0.189	9.54731e-105
FB.01.PDGFRA	VCL	4.66255e-44	80.9524	0.664	0.555	1.60061e-39
FB.01.PDGFRA	PLD1	3.0053e-206	80.7002	0.368	0.105	1.03169e-201
FB.01.PDGFRA	PSD3	0	79.7659	0.743	0.286	0
FB.01.PDGFRA	NEBL	0	79.7205	0.473	0.115	0
FB.01.PDGFRA	AUTS2	1.4464e-252	79.6147	0.667	0.348	4.96534e-248
FB.01.PDGFRA	PRKCA	0	79.6134	0.685	0.234	0
FB.01.PDGFRA	TIPARP	7.74209e-57	79.543	0.31	0.171	2.65778e-52
FB.01.PDGFRA	OXR1	4.32345e-50	79.5408	0.408	0.265	1.4842e-45
FB.01.PDGFRA	TOP1	2.27053e-47	79.5106	0.529	0.395	7.7945e-43
FB.01.PDGFRA	SYNPO2	4.01279e-145	78.6157	0.516	0.269	1.37755e-140
FB.01.PDGFRA	TRABD2B	3.19464e-291	78.6148	0.339	0.058	1.09669e-286
FB.01.PDGFRA	MYO1D	6.24354e-229	78.3579	0.619	0.295	2.14334e-224
FB.01.PDGFRA	TRIM22	3.0862e-130	78.1721	0.452	0.213	1.05946e-125
FB.01.PDGFRA	AVEN	1.45293e-79	78.1182	0.312	0.141	4.98776e-75
FB.01.PDGFRA	WLS	5.55796e-21	77.7916	0.401	0.311	1.90799e-16
FB.01.PDGFRA	PSMA5	1.48124e-10	76.7028	0.205	0.262	5.08495e-06
FB.01.PDGFRA	DLG1	7.15744e-82	76.6985	0.551	0.354	2.45708e-77
FB.01.PDGFRA	KMT2E	3.11627e-19	76.624	0.51	0.431	1.06978e-14
FB.01.PDGFRA	ZBTB38	6.2525e-52	76.4407	0.528	0.386	2.14642e-47
FB.01.PDGFRA	ADAMTSL1	0	76.2003	0.302	0.026	0
FB.01.PDGFRA	LRRFIP1	5.63445e-42	75.5081	0.57	0.435	1.93425e-37
FB.01.PDGFRA	XYLT1	0	75.2867	0.404	0.056	0
FB.01.PDGFRA	AC092957.1	8.00817e-231	73.844	0.298	0.059	2.74912e-226
FB.01.PDGFRA	CLSTN2	5.33441e-245	73.8389	0.312	0.061	1.83125e-240
FB.01.PDGFRA	KIF13B	3.93342e-155	73.792	0.369	0.131	1.3503e-150
FB.01.PDGFRA	EXT1	9.96076e-285	72.9065	0.643	0.278	3.41943e-280
FB.01.PDGFRA	PKP4	2.18832e-182	71.1051	0.431	0.164	7.51229e-178
FB.01.PDGFRA	VGLL3	4.18421e-109	70.9585	0.351	0.153	1.4364e-104
FB.01.PDGFRA	ARL6IP5	1.24192e-90	70.9573	0.116	0.326	4.26339e-86
FB.01.PDGFRA	NCOR1	2.99204e-69	70.748	0.61	0.426	1.02714e-64
FB.01.PDGFRA	TNRC6C	2.07033e-70	70.5759	0.387	0.21	7.10724e-66
FB.01.PDGFRA	BPTF	1.84609e-91	70.2571	0.577	0.363	6.33743e-87
FB.01.PDGFRA	PTPN1	6.15362e-85	69.6832	0.484	0.286	2.11248e-80
FB.01.PDGFRA	GBE1	7.33687e-185	69.6045	0.485	0.203	2.51867e-180
FB.01.PDGFRA	PLSCR4	1.06156e-134	69.5254	0.539	0.287	3.64424e-130
FB.01.PDGFRA	ATF6	1.2094e-16	69.5073	0.307	0.229	4.15176e-12
FB.01.PDGFRA	CBLB	0	69.3855	0.766	0.351	0
FB.01.PDGFRA	ARL13B	2.60826e-24	69.2533	0.251	0.16	8.9539e-20
FB.01.PDGFRA	EFNA5	1.06656e-262	69.1486	0.398	0.099	3.6614e-258
FB.01.PDGFRA	TRAM2	1.02852e-118	68.7563	0.462	0.227	3.53081e-114
FB.01.PDGFRA	TSHZ2	0	68.6612	0.324	0.033	0
FB.01.PDGFRA	PLEKHA5	1.77688e-264	68.1435	0.678	0.327	6.09984e-260
FB.01.PDGFRA	MAML2	1.15063e-92	67.6264	0.65	0.471	3.95001e-88
FB.01.PDGFRA	NCOA7	1.43879e-158	67.0127	0.558	0.296	4.93921e-154
FB.01.PDGFRA	LMO7	1.44492e-252	66.6305	0.546	0.209	4.96028e-248
FB.01.PDGFRA	CAST	1.1491e-51	66.6231	0.597	0.446	3.94475e-47
FB.01.PDGFRA	ATP2A2	6.80502e-13	65.5355	0.48	0.399	2.3361e-08
FB.01.PDGFRA	BMP2K	3.11519e-96	65.2727	0.396	0.188	1.06941e-91
FB.01.PDGFRA	PTPRG	8.03863e-185	65.1878	0.844	0.557	2.75958e-180
FB.01.PDGFRA	IL1R1	0	64.497	0.612	0.221	0
FB.01.PDGFRA	MBNL2	6.14487e-86	63.7451	0.52	0.325	2.10947e-81
FB.01.PDGFRA	PRRC2C	5.76759e-37	63.6955	0.615	0.495	1.97996e-32
FB.01.PDGFRA	ABCA6	0	62.5388	0.543	0.074	0
FB.01.PDGFRA	PIEZO2	4.00533e-116	62.3024	0.537	0.285	1.37499e-111
FB.01.PDGFRA	BAZ1A	8.3574e-09	62.2131	0.294	0.233	0.000286901
FB.01.PDGFRA	TGFBR2	6.14906e-199	61.9214	0.654	0.366	2.11091e-194
FB.01.PDGFRA	B4GALT1	7.84877e-16	61.164	0.292	0.21	2.6944e-11
FB.01.PDGFRA	ZFAND5	2.23177e-37	60.8597	0.471	0.364	7.66143e-33
FB.01.PDGFRA	LYPLAL1	2.24332e-107	60.8582	0.377	0.173	7.70108e-103
FB.01.PDGFRA	KIAA1217	1.63125e-239	60.8577	0.497	0.182	5.59993e-235
FB.01.PDGFRA	CAPRIN2	2.16085e-183	60.4332	0.315	0.082	7.41799e-179
FB.01.PDGFRA	ABL2	6.13042e-76	60.3838	0.388	0.209	2.10451e-71
FB.01.PDGFRA	MTHFD1L	0	60.2783	0.588	0.177	0
FB.01.PDGFRA	TBX15	2.38002e-109	59.3587	0.508	0.259	8.17036e-105
FB.01.PDGFRA	MICAL2	0	59.1508	0.693	0.274	0
FB.01.PDGFRA	PACS1	2.63253e-104	59.1503	0.513	0.293	9.0372e-100
FB.01.PDGFRA	ATP13A3	7.92709e-194	59.0283	0.533	0.232	2.72129e-189
FB.01.PDGFRA	NCAM2	4.68715e-296	59.0086	0.304	0.043	1.60905e-291
FB.01.PDGFRA	CELF2	0	58.9721	0.617	0.18	0
FB.01.PDGFRA	HNRNPU	2.00402e-18	58.5545	0.571	0.496	6.87959e-14
FB.01.PDGFRA	SYNDIG1	0	58.461	0.316	0.031	0
FB.01.PDGFRA	SLIT2	2.7761e-215	58.3864	0.411	0.128	9.53006e-211
FB.01.PDGFRA	MACF1	1.84048e-182	58.2679	0.865	0.651	6.31818e-178
FB.01.PDGFRA	EGFR	1.11394e-139	57.9763	0.524	0.271	3.82406e-135
FB.01.PDGFRA	ITSN1	1.54457e-240	57.9743	0.67	0.331	5.30236e-236
FB.01.PDGFRA	APP	7.08513e-10	57.9646	0.513	0.602	2.43226e-05
FB.01.PDGFRA	WDR35	2.70107e-65	57.1094	0.256	0.112	9.27249e-61
FB.01.PDGFRA	ABCA9	0	56.6425	0.549	0.096	0
FB.01.PDGFRA	ARID5B	8.63172e-09	56.6292	0.543	0.501	0.000296318
FB.01.PDGFRA	FNIP2	1.76317e-84	56.5317	0.462	0.266	6.05278e-80
FB.01.PDGFRA	FLRT2	0	56.3357	0.544	0.066	0
FB.01.PDGFRA	ANK2	5.65441e-231	55.9975	0.383	0.103	1.9411e-226
FB.01.PDGFRA	PCCA	0	55.8732	0.733	0.332	0
FB.01.PDGFRA	DMXL2	6.49148e-131	55.7026	0.386	0.158	2.22846e-126
FB.01.PDGFRA	MTUS1	1.61206e-28	55.4652	0.281	0.403	5.53405e-24
FB.01.PDGFRA	KIAA1328	1.12259e-69	54.8758	0.366	0.192	3.85375e-65
FB.01.PDGFRA	COL5A2	5.7928e-152	54.6101	0.834	0.66	1.98861e-147
FB.01.PDGFRA	SETD5	5.77488e-103	54.5821	0.609	0.382	1.98246e-98
FB.01.PDGFRA	ITGAV	1.19961e-90	54.461	0.647	0.463	4.11813e-86
FB.01.PDGFRA	LARP4	1.007e-139	53.8616	0.445	0.194	3.45693e-135
FB.01.PDGFRA	PCNX4	9.36942e-232	53.6894	0.599	0.261	3.21643e-227
FB.01.PDGFRA	PCNX1	1.86915e-238	53.6431	0.611	0.272	6.41661e-234
FB.01.PDGFRA	PCMTD1	5.04526e-51	53.5395	0.439	0.29	1.73199e-46
FB.01.PDGFRA	CWC27	1.38621e-49	52.6802	0.329	0.186	4.75874e-45
FB.01.PDGFRA	MEG3	0	52.356	0.751	0.3	0
FB.01.PDGFRA	EMP1	7.01334e-123	52.2404	0.412	0.184	2.40761e-118
FB.01.PDGFRA	MIR34AHG	4.09067e-259	51.9929	0.367	0.083	1.40429e-254
FB.01.PDGFRA	RNF220	0	51.8814	0.557	0.14	0
FB.01.PDGFRA	BTAF1	6.62668e-163	51.5435	0.487	0.208	2.27487e-158
FB.01.PDGFRA	ARHGAP29	0.0833867	51.1563	0.561	0.562	1
FB.01.PDGFRA	GLS	8.81478e-93	51.1352	0.606	0.393	3.02602e-88
FB.01.PDGFRA	MEF2A	3.9741e-154	51.0146	0.565	0.312	1.36427e-149
FB.01.PDGFRA	PHLDB2	3.51675e-41	50.7928	0.487	0.341	1.20726e-36
FB.01.PDGFRA	F3	2.3398e-188	50.7609	0.584	0.316	8.03229e-184
FB.01.PDGFRA	SUMO1	1.44697e-81	50.7609	0.1	0.29	4.9673e-77
FB.01.PDGFRA	CADPS2	0	50.7364	0.596	0.156	0
FB.01.PDGFRA	MAP3K5	8.42185e-215	50.7362	0.621	0.288	2.89114e-210
FB.01.PDGFRA	YBX3	0.218393	50.579	0.288	0.281	1
FB.01.PDGFRA	FLVCR2	0	50.5238	0.469	0.086	0
FB.01.PDGFRA	NPHP3	2.76362e-94	50.4993	0.384	0.181	9.48723e-90
FB.01.PDGFRA	FAF1	8.72972e-84	49.8684	0.526	0.322	2.99683e-79
FB.01.PDGFRA	MSI2	2.31238e-204	49.476	0.573	0.268	7.93818e-200
FB.01.PDGFRA	ZRANB2	2.25101e-214	49.3925	0.664	0.34	7.72749e-210
FB.01.PDGFRA	SERINC5	6.10308e-126	49.1592	0.454	0.222	2.09513e-121
FB.01.PDGFRA	PHF10	1.75373e-120	48.3423	0.277	0.091	6.02038e-116
FB.01.PDGFRA	IRAK3	1.50517e-232	48.3069	0.444	0.146	5.16711e-228
FB.01.PDGFRA	ABL1	6.59029e-160	48.2748	0.572	0.289	2.26238e-155
FB.01.PDGFRA	GFPT2	1.91463e-298	48.1702	0.415	0.095	6.57275e-294
FB.01.PDGFRA	USP15	5.78231e-103	47.9415	0.514	0.29	1.98501e-98
FB.01.PDGFRA	LTBP1	0	47.8742	0.69	0.278	0
FB.01.PDGFRA	HIVEP2	1.21262e-126	47.8329	0.547	0.291	4.1628e-122
FB.01.PDGFRA	KCNQ3	1.20439e-20	47.5596	0.331	0.242	4.13454e-16
FB.01.PDGFRA	BICD1	0	47.5019	0.693	0.256	0
FB.01.PDGFRA	SFPQ	5.08299e-139	47.342	0.704	0.444	1.74494e-134
FB.01.PDGFRA	MAN1A1	5.81284e-148	47.1954	0.433	0.187	1.99549e-143
FB.01.PDGFRA	BOC	0	47.1089	0.32	0.041	0
FB.01.PDGFRA	PLSCR1	1.45252e-13	46.5171	0.401	0.33	4.98634e-09
FB.01.PDGFRA	ERCC6	1.21978e-145	46.5161	0.316	0.1	4.18739e-141
FB.01.PDGFRA	DDR2	1.3801e-137	46.4328	0.555	0.303	4.73774e-133
FB.01.PDGFRA	RANBP2	3.97811e-33	46.4328	0.343	0.228	1.36564e-28
FB.01.PDGFRA	ARMC9	2.93394e-277	46.4173	0.491	0.149	1.00719e-272
FB.01.PDGFRA	NCOA1	1.20602e-138	45.9924	0.61	0.351	4.14016e-134
FB.01.PDGFRA	RANBP3L	6.12197e-237	45.8626	0.327	0.072	2.10161e-232
FB.01.PDGFRA	SH3PXD2B	0	45.7306	0.493	0.132	0
FB.01.PDGFRA	NOX4	0	45.3473	0.543	0.072	0
FB.01.PDGFRA	COL4A5	5.32862e-276	45.1958	0.351	0.07	1.82926e-271
FB.01.PDGFRA	GLUD1	0.832995	45.152	0.298	0.293	1
FB.01.PDGFRA	PAWR	1.8237e-13	44.7136	0.368	0.301	6.26057e-09
FB.01.PDGFRA	ST5	7.94259e-133	44.5549	0.344	0.125	2.72661e-128
FB.01.PDGFRA	PGM2L1	8.27415e-103	44.4395	0.277	0.104	2.84043e-98
FB.01.PDGFRA	PARD3B	0	44.0001	0.778	0.393	0
FB.01.PDGFRA	PRICKLE1	0	43.9995	0.504	0.082	0
FB.01.PDGFRA	NBEA	0	43.6758	0.504	0.108	0
FB.01.PDGFRA	EIF4G3	2.16203e-274	43.5812	0.773	0.425	7.42203e-270
FB.01.PDGFRA	FNDC3A	6.84506e-161	43.5474	0.619	0.341	2.34984e-156
FB.01.PDGFRA	IGF1R	1.134e-94	43.3013	0.468	0.264	3.8929e-90
FB.01.PDGFRA	PRKD1	0	43.277	0.629	0.188	0
FB.01.PDGFRA	PRICKLE2	0	43.1928	0.637	0.209	0
FB.01.PDGFRA	ROR2	0	42.964	0.588	0.058	0
FB.01.PDGFRA	ROCK2	7.74636e-43	42.7486	0.564	0.415	2.65925e-38
FB.01.PDGFRA	COL7A1	2.10354e-229	42.4945	0.377	0.104	7.22125e-225
FB.01.PDGFRA	ARL15	1.63843e-149	42.4752	0.462	0.202	5.62456e-145
FB.01.PDGFRA	ARHGEF7	0.00434975	42.1047	0.492	0.42	1
FB.01.PDGFRA	RAD51B	1.27021e-72	42.1047	0.42	0.232	4.36051e-68
FB.01.PDGFRA	SGCD	0	42.0785	0.414	0.031	0
FB.01.PDGFRA	PTPN13	0	41.9041	0.679	0.289	0
FB.01.PDGFRA	ADGRD1	1.91069e-47	41.6171	0.257	0.134	6.55921e-43
FB.01.PDGFRA	MCL1	5.20682e-33	40.662	0.532	0.423	1.78745e-28
FB.01.PDGFRA	BBS9	4.12065e-293	40.5884	0.766	0.375	1.41458e-288
FB.01.PDGFRA	ANO6	1.62515e-41	40.3177	0.51	0.355	5.57897e-37
FB.01.PDGFRA	KDM5B	9.13312e-53	40.3161	0.359	0.21	3.13531e-48
FB.01.PDGFRA	ZBTB1	7.26858e-107	39.9406	0.43	0.209	2.49523e-102
FB.01.PDGFRA	GAREM1	1.25544e-125	39.84	0.311	0.111	4.30979e-121
FB.01.PDGFRA	DIAPH2	1.73408e-123	39.2696	0.61	0.357	5.95293e-119
FB.01.PDGFRA	MAN2A1	1.18331e-278	39.2579	0.617	0.259	4.06219e-274
FB.01.PDGFRA	KLF12	1.76365e-118	39.2193	0.648	0.403	6.05442e-114
FB.01.PDGFRA	TGFBR3	1.08612e-187	39.2096	0.339	0.097	3.72855e-183
FB.01.PDGFRA	UBXN4	1.26766e-07	39.1544	0.496	0.441	0.00435173
FB.01.PDGFRA	RASA2	5.06713e-116	38.7277	0.456	0.229	1.73949e-111
FB.01.PDGFRA	YAF2	4.08909e-109	38.4515	0.47	0.24	1.40374e-104
FB.01.PDGFRA	FGD4	0.000889252	38.192	0.31	0.275	1
FB.01.PDGFRA	REPS1	2.32573e-170	37.8258	0.416	0.154	7.98398e-166
FB.01.PDGFRA	NTM	1.39072e-149	37.7768	0.619	0.358	4.7742e-145
FB.01.PDGFRA	SH3RF3	8.05431e-244	37.7734	0.56	0.21	2.76496e-239
FB.01.PDGFRA	PACSIN2	6.06509e-29	37.7283	0.297	0.421	2.08208e-24
FB.01.PDGFRA	UVRAG	3.09374e-124	37.6029	0.505	0.254	1.06205e-119
FB.01.PDGFRA	FAM168A	6.95535e-76	37.5318	0.413	0.229	2.3877e-71
FB.01.PDGFRA	ACADVL	1.01257e-22	37.5107	0.398	0.291	3.47604e-18
FB.01.PDGFRA	PFKFB3	1.61394e-91	37.3284	0.33	0.148	5.5405e-87
FB.01.PDGFRA	AHCYL2	1.07588e-108	37.1646	0.317	0.128	3.69338e-104
FB.01.PDGFRA	MDFIC	2.15765e-243	37.0903	0.551	0.207	7.40701e-239
FB.01.PDGFRA	SPRED2	1.13549e-112	36.9623	0.468	0.235	3.89803e-108
FB.01.PDGFRA	CALCRL	2.51893e-53	36.9514	0.309	0.168	8.64724e-49
FB.01.PDGFRA	ATXN7	8.4859e-112	36.8347	0.403	0.182	2.91312e-107
FB.01.PDGFRA	PCGF5	0	36.7851	0.558	0.166	0
FB.01.PDGFRA	ETNK1	9.26609e-83	36.5264	0.448	0.251	3.18095e-78
FB.01.PDGFRA	FGFR1	5.34893e-90	36.3069	0.333	0.144	1.83623e-85
FB.01.PDGFRA	SETD2	5.92093e-91	36.2031	0.512	0.291	2.0326e-86
FB.01.PDGFRA	HECTD2	2.3076e-222	36.1948	0.409	0.121	7.92175e-218
FB.01.PDGFRA	NCOR2	9.17896e-203	36.0489	0.623	0.308	3.15105e-198
FB.01.PDGFRA	TMEM45A	4.89617e-101	35.786	0.314	0.129	1.68081e-96
FB.01.PDGFRA	PRELID2	8.50116e-227	35.7435	0.313	0.065	2.91836e-222
FB.01.PDGFRA	ATXN7L1	1.76852e-116	35.6212	0.416	0.188	6.07115e-112
FB.01.PDGFRA	USP25	2.30022e-134	35.458	0.495	0.236	7.89641e-130
FB.01.PDGFRA	NPAS2	1.32328e-162	35.4433	0.441	0.175	4.54268e-158
FB.01.PDGFRA	HDAC4	2.96954e-208	35.3721	0.44	0.149	1.01941e-203
FB.01.PDGFRA	MAPK14	2.53687e-98	35.3341	0.352	0.158	8.70884e-94
FB.01.PDGFRA	STK24	5.93405e-55	35.0796	0.447	0.289	2.0371e-50
FB.01.PDGFRA	TSPAN5	0	34.8088	0.602	0.219	0
FB.01.PDGFRA	RAPGEF4	2.21148e-108	34.6062	0.465	0.238	7.59179e-104
FB.01.PDGFRA	USP13	9.57581e-43	34.1795	0.357	0.216	3.28728e-38
FB.01.PDGFRA	ABHD5	6.34544e-96	33.7786	0.285	0.114	2.17833e-91
FB.01.PDGFRA	ZFHX4	1.22842e-276	33.5748	0.307	0.047	4.21706e-272
FB.01.PDGFRA	ATM	2.38972e-191	33.5713	0.568	0.26	8.20367e-187
FB.01.PDGFRA	SDK1	3.67494e-67	33.4486	0.264	0.121	1.26157e-62
FB.01.PDGFRA	SPTBN1	1.33472e-92	33.4485	0.772	0.632	4.58198e-88
FB.01.PDGFRA	CGNL1	1.99415e-261	33.4482	0.257	0.032	6.84572e-257
FB.01.PDGFRA	EMP2	7.00884e-36	32.99	0.144	0.264	2.40607e-31
FB.01.PDGFRA	ABCA1	2.69594e-193	32.5867	0.475	0.192	9.25491e-189
FB.01.PDGFRA	ZHX2	1.65218e-54	32.3566	0.312	0.171	5.67175e-50
FB.01.PDGFRA	YAP1	6.7645e-185	32.3538	0.624	0.329	2.32218e-180
FB.01.PDGFRA	SNED1	0	32.0058	0.46	0.068	0
FB.01.PDGFRA	VCAN	0	32.0058	0.706	0.238	0
FB.01.PDGFRA	ARNT2	0	31.992	0.36	0.056	0
FB.01.PDGFRA	STXBP4	1.31836e-129	31.9789	0.474	0.224	4.5258e-125
FB.01.PDGFRA	TTC19	1.66418e-27	31.874	0.335	0.225	5.71296e-23
FB.01.PDGFRA	FAT4	1.42014e-196	31.7566	0.282	0.061	4.87521e-192
FB.01.PDGFRA	RRAS2	4.0086e-68	31.7395	0.289	0.134	1.37611e-63
FB.01.PDGFRA	MBOAT2	1.12664e-179	31.6385	0.448	0.179	3.86764e-175
FB.01.PDGFRA	ADAMTS6	2.57525e-135	31.5453	0.305	0.103	8.84059e-131
FB.01.PDGFRA	TMTC1	6.87679e-113	31.4781	0.48	0.251	2.36073e-108
FB.01.PDGFRA	GPC6	0	31.3849	0.699	0.264	0
FB.01.PDGFRA	MAN1A2	2.78029e-16	31.2251	0.355	0.277	9.54446e-12
FB.01.PDGFRA	CEP120	9.79184e-89	31.2164	0.251	0.093	3.36144e-84
FB.01.PDGFRA	PALM2-AKAP2	3.63383e-70	31.143	0.29	0.128	1.24746e-65
FB.01.PDGFRA	PCBP3	1.08139e-33	30.7462	0.311	0.199	3.7123e-29
FB.01.PDGFRA	SLC22A23	3.74018e-188	30.7443	0.365	0.113	1.28397e-183
FB.01.PDGFRA	SLC39A14	2.8649e-111	30.5286	0.295	0.112	9.83493e-107
FB.01.PDGFRA	CENPP	5.4051e-140	30.4828	0.434	0.189	1.85552e-135
FB.01.PDGFRA	CTNNB1	1.00895e-69	30.0795	0.572	0.41	3.46362e-65
FB.01.PDGFRA	MED23	2.12474e-53	29.9657	0.272	0.136	7.29403e-49
FB.01.PDGFRA	SBF2	5.68741e-182	29.8643	0.705	0.401	1.95243e-177
FB.01.PDGFRA	NOVA1	2.66651e-177	29.827	0.281	0.069	9.15385e-173
FB.01.PDGFRA	ZNF532	5.65763e-56	29.814	0.43	0.263	1.94221e-51
FB.01.PDGFRA	VAPB	4.99643e-30	29.8111	0.273	0.167	1.71523e-25
FB.01.PDGFRA	PER1	3.05445e-56	29.4324	0.335	0.182	1.04856e-51
FB.01.PDGFRA	ZMYND8	9.02496e-51	29.4192	0.329	0.185	3.09818e-46
FB.01.PDGFRA	KPNA4	3.08368e-11	29.2717	0.31	0.242	1.0586e-06
FB.01.PDGFRA	SPSB1	9.71658e-172	29.1334	0.386	0.132	3.3356e-167
FB.01.PDGFRA	HSPA1B	4.78041e-102	29.1204	0.098	0.326	1.64107e-97
FB.01.PDGFRA	RUNX1	8.27783e-280	29.1204	0.699	0.341	2.8417e-275
FB.01.PDGFRA	SYNE1	5.34846e-193	29.1107	0.668	0.36	1.83607e-188
FB.01.PDGFRA	DIXDC1	6.4319e-133	29.0014	0.293	0.094	2.20801e-128
FB.01.PDGFRA	PHLDA1	0.541367	28.84	0.425	0.441	1
FB.01.PDGFRA	ADAM10	2.61265e-58	28.6946	0.549	0.378	8.96898e-54
FB.01.PDGFRA	MAN1C1	3.07482e-188	28.2906	0.308	0.077	1.05555e-183
FB.01.PDGFRA	SNHG14	1.91611e-187	28.2432	0.577	0.269	6.57781e-183
FB.01.PDGFRA	MAP4K3	1.35396e-216	28.2117	0.626	0.3	4.64802e-212
FB.01.PDGFRA	FARP1	1.88483e-14	28.1937	0.54	0.456	6.47042e-10
FB.01.PDGFRA	HTT	2.55989e-97	28.1077	0.436	0.219	8.78785e-93
FB.01.PDGFRA	SIPA1L1	0	28.0743	0.725	0.259	0
FB.01.PDGFRA	CCDC3	1.43068e-98	27.9876	0.108	0.33	4.91138e-94
FB.01.PDGFRA	TMEM164	1.85597e-130	27.9003	0.295	0.096	6.37134e-126
FB.01.PDGFRA	ANTXR1	5.00191e-133	27.6779	0.635	0.381	1.71711e-128
FB.01.PDGFRA	STARD13	1.06218e-85	27.6777	0.614	0.388	3.64636e-81
FB.01.PDGFRA	CHD2	6.64026e-100	27.6777	0.554	0.338	2.27954e-95
FB.01.PDGFRA	SMARCA2	2.04568e-59	27.6757	0.436	0.271	7.02263e-55
FB.01.PDGFRA	PHF20L1	4.07181e-85	27.489	0.481	0.274	1.39781e-80
FB.01.PDGFRA	PTAR1	1.5051e-36	27.421	0.284	0.173	5.16684e-32
FB.01.PDGFRA	GLI3	3.92246e-202	27.3277	0.512	0.204	1.34654e-197
FB.01.PDGFRA	SUSD6	1.48029e-174	27.205	0.54	0.263	5.08167e-170
FB.01.PDGFRA	AFF4	4.86648e-106	27.1829	0.623	0.393	1.67061e-101
FB.01.PDGFRA	TNIK	1.54662e-266	27.1135	0.45	0.127	5.30941e-262
FB.01.PDGFRA	DOCK5	7.89934e-294	26.969	0.614	0.239	2.71176e-289
FB.01.PDGFRA	ABCC4	0	26.85	0.386	0.062	0
FB.01.PDGFRA	SEC14L1	2.51888e-33	26.8052	0.356	0.239	8.64707e-29
FB.01.PDGFRA	PALLD	1.87505e-114	26.796	0.604	0.393	6.43686e-110
FB.01.PDGFRA	ARRDC3	7.00899e-68	26.5534	0.287	0.141	2.40612e-63
FB.01.PDGFRA	NCOA3	5.15864e-75	26.491	0.474	0.278	1.77091e-70
FB.01.PDGFRA	HNRNPLL	1.98175e-55	26.3472	0.329	0.179	6.80314e-51
FB.01.PDGFRA	TUT4	5.72116e-106	26.338	0.48	0.25	1.96402e-101
FB.01.PDGFRA	KIAA0825	1.3455e-238	26.2408	0.457	0.142	4.61897e-234
FB.01.PDGFRA	CTIF	1.45878e-270	26.2353	0.494	0.156	5.00786e-266
FB.01.PDGFRA	GUCY1A1	0.00738568	26.2335	0.336	0.314	1
FB.01.PDGFRA	ARHGAP31	7.31053e-204	26.202	0.364	0.105	2.50963e-199
FB.01.PDGFRA	SLC9A9	9.79798e-128	26.1566	0.484	0.235	3.36355e-123
FB.01.PDGFRA	RESF1	7.70454e-30	26.1211	0.307	0.2	2.64489e-25
FB.01.PDGFRA	TNKS	9.62883e-206	25.9658	0.619	0.29	3.30548e-201
FB.01.PDGFRA	LPGAT1	5.52603e-17	25.8564	0.288	0.208	1.89703e-12
FB.01.PDGFRA	TANK	3.00873e-111	25.7316	0.449	0.23	1.03287e-106
FB.01.PDGFRA	TPST1	0	25.6238	0.557	0.182	0
FB.01.PDGFRA	RASSF8	2.18304e-264	25.4217	0.47	0.147	7.49416e-260
FB.01.PDGFRA	SLC44A1	7.62097e-151	25.2965	0.485	0.227	2.6162e-146
FB.01.PDGFRA	ATP10D	5.18725e-271	24.9347	0.646	0.293	1.78073e-266
FB.01.PDGFRA	NFE2L2	8.12078e-73	24.9177	0.483	0.294	2.78778e-68
FB.01.PDGFRA	RAP1B	1.71211e-19	24.8256	0.561	0.466	5.87752e-15
FB.01.PDGFRA	ABCA8	4.55212e-247	24.8185	0.388	0.103	1.5627e-242
FB.01.PDGFRA	ATP10A	6.84784e-50	24.7928	0.459	0.298	2.3508e-45
FB.01.PDGFRA	MTSS1	3.85513e-151	24.7923	0.401	0.163	1.32343e-146
FB.01.PDGFRA	CCDC91	8.39729e-173	24.6482	0.573	0.281	2.88271e-168
FB.01.PDGFRA	IFNGR1	6.31578e-25	24.5175	0.361	0.258	2.16814e-20
FB.01.PDGFRA	ANKS1A	1.28174e-55	24.3587	0.282	0.146	4.40008e-51
FB.01.PDGFRA	PLXDC2	0	24.3004	0.776	0.333	0
FB.01.PDGFRA	BMERB1	1.52969e-149	24.2434	0.315	0.098	5.25127e-145
FB.01.PDGFRA	ZBTB16	5.65557e-236	24.1674	0.677	0.35	1.9415e-231
FB.01.PDGFRA	CHD1	5.09982e-49	24.0741	0.397	0.246	1.75072e-44
FB.01.PDGFRA	APPL2	0	23.9469	0.604	0.168	0
FB.01.PDGFRA	RIN2	0	23.9292	0.57	0.189	0
FB.01.PDGFRA	OSBPL10	6.69236e-205	23.8818	0.449	0.157	2.29742e-200
FB.01.PDGFRA	FHIT	3.24264e-157	23.8805	0.418	0.172	1.11317e-152
FB.01.PDGFRA	ZNF423	3.47426e-111	23.8273	0.331	0.131	1.19268e-106
FB.01.PDGFRA	ATP9B	6.33601e-153	23.8016	0.513	0.231	2.17509e-148
FB.01.PDGFRA	CAMK1D	1.00695e-105	23.69	0.483	0.267	3.45675e-101
FB.01.PDGFRA	PPM1H	6.08545e-243	23.4502	0.426	0.129	2.08907e-238
FB.01.PDGFRA	IL6ST	1.94617e-74	23.3497	0.617	0.45	6.681e-70
FB.01.PDGFRA	MAP3K8	7.42319e-32	23.2996	0.251	0.148	2.54831e-27
FB.01.PDGFRA	KMT2C	3.76602e-99	23.2694	0.595	0.381	1.29284e-94
FB.01.PDGFRA	AHI1	0	23.2116	0.697	0.294	0
FB.01.PDGFRA	TJP1	8.57063e-105	23.1062	0.739	0.557	2.94221e-100
FB.01.PDGFRA	THADA	1.69833e-205	22.9051	0.509	0.198	5.83019e-201
FB.01.PDGFRA	PBX3	2.68541e-178	22.8966	0.497	0.206	9.21873e-174
FB.01.PDGFRA	ARMC8	1.30595e-114	22.884	0.455	0.219	4.48318e-110
FB.01.PDGFRA	GOLIM4	5.14288e-06	22.8535	0.395	0.349	0.17655
FB.01.PDGFRA	NALCN	2.97195e-277	22.6004	0.261	0.03	1.02024e-272
FB.01.PDGFRA	ATXN1	1.6875e-195	22.5522	0.668	0.377	5.79301e-191
FB.01.PDGFRA	KAZN	9.82063e-180	22.3799	0.46	0.201	3.37132e-175
FB.01.PDGFRA	DDX17	8.15199e-269	22.3605	0.858	0.57	2.7985e-264
FB.01.PDGFRA	EOGT	1.08935e-117	22.3541	0.266	0.085	3.73962e-113
FB.01.PDGFRA	TEAD1	1.59163e-227	22.242	0.745	0.426	5.46391e-223
FB.01.PDGFRA	PLAGL1	0	22.2006	0.564	0.179	0
FB.01.PDGFRA	ABCD3	1.42916e-121	22.1591	0.389	0.167	4.90616e-117
FB.01.PDGFRA	PIAS1	4.11521e-179	22.1021	0.614	0.32	1.41271e-174
FB.01.PDGFRA	LPAR1	0	21.988	0.432	0.066	0
FB.01.PDGFRA	LDLRAD4	0	21.9777	0.544	0.171	0
FB.01.PDGFRA	BHLHE40	2.63305e-45	21.9387	0.272	0.154	9.03899e-41
FB.01.PDGFRA	AFDN	6.62605e-205	21.9129	0.318	0.078	2.27466e-200
FB.01.PDGFRA	RTN4	0.0349519	21.907	0.553	0.608	1
FB.01.PDGFRA	TNS1	1.39773e-56	21.907	0.617	0.437	4.79828e-52
FB.01.PDGFRA	LRRFIP2	1.79505e-13	21.907	0.415	0.339	6.16222e-09
FB.01.PDGFRA	CAMSAP2	1.11741e-83	21.8325	0.485	0.276	3.83596e-79
FB.01.PDGFRA	NUMB	1.64378e-185	21.7241	0.596	0.291	5.64294e-181
FB.01.PDGFRA	CRADD	4.43373e-90	21.6729	0.339	0.155	1.52205e-85
FB.01.PDGFRA	PTPRM	0	21.6148	0.783	0.331	0
FB.01.PDGFRA	AKT3	1.93026e-195	21.4891	0.743	0.443	6.62641e-191
FB.01.PDGFRA	KIF1B	8.95699e-108	21.4479	0.515	0.286	3.07484e-103
FB.01.PDGFRA	GK5	0	21.3444	0.395	0.075	0
FB.01.PDGFRA	UBR4	5.58744e-181	21.1933	0.585	0.277	1.91811e-176
FB.01.PDGFRA	YTHDC2	6.98048e-175	21.1267	0.516	0.224	2.39633e-170
FB.01.PDGFRA	WSB1	2.11129e-293	21.1074	0.802	0.471	7.24785e-289
FB.01.PDGFRA	SKI	5.86743e-151	21.0493	0.459	0.198	2.01423e-146
FB.01.PDGFRA	ATG7	2.65676e-181	21.0238	0.529	0.232	9.12039e-177
FB.01.PDGFRA	SAMD5	3.07261e-270	20.9999	0.359	0.076	1.0548e-265
FB.01.PDGFRA	TTLL5	9.28103e-250	20.938	0.513	0.179	3.18609e-245
FB.01.PDGFRA	CHIC2	0	20.9021	0.562	0.144	0
FB.01.PDGFRA	CARMIL1	6.10777e-190	20.9005	0.415	0.143	2.09674e-185
FB.01.PDGFRA	MCC	0	20.5903	0.571	0.16	0
FB.01.PDGFRA	CPM	7.76817e-143	20.5392	0.132	0.435	2.66674e-138
FB.01.PDGFRA	PICALM	1.64503e-114	20.5354	0.712	0.471	5.64721e-110
FB.01.PDGFRA	PMEPA1	1.236e-07	20.4643	0.359	0.422	0.00424305
FB.01.PDGFRA	EIF1AX	1.2903e-90	20.4643	0.105	0.312	4.42949e-86
FB.01.PDGFRA	NFAT5	6.64433e-114	20.4463	0.601	0.364	2.28093e-109
FB.01.PDGFRA	ABLIM3	1.03854e-191	20.4342	0.281	0.062	3.56519e-187
FB.01.PDGFRA	MITF	5.14453e-175	20.391	0.36	0.114	1.76607e-170
FB.01.PDGFRA	TTC39B	3.81642e-177	20.2739	0.447	0.174	1.31014e-172
FB.01.PDGFRA	DYNC1LI2	1.95213e-06	20.2516	0.335	0.28	0.0670146
FB.01.PDGFRA	KANSL1	1.28453e-247	20.187	0.699	0.347	4.40968e-243
FB.01.PDGFRA	ARHGAP12	8.09145e-129	20.1862	0.435	0.202	2.77771e-124
FB.01.PDGFRA	TNFRSF21	1.4205e-37	19.9744	0.133	0.259	4.87644e-33
FB.01.PDGFRA	PPP3CC	2.11875e-108	19.9744	0.496	0.26	7.27346e-104
FB.01.PDGFRA	IL4R	3.66182e-169	19.7421	0.431	0.169	1.25707e-164
FB.01.PDGFRA	GABRE	2.70954e-223	19.705	0.255	0.04	9.30158e-219
FB.01.PDGFRA	DSE	3.43619e-125	19.5928	0.544	0.297	1.17961e-120
FB.01.PDGFRA	FAM118A	7.15153e-25	19.5357	0.304	0.201	2.45505e-20
FB.01.PDGFRA	MCTP2	4.57551e-265	19.4643	0.305	0.049	1.57073e-260
FB.01.PDGFRA	ECPAS	5.32144e-160	19.443	0.544	0.262	1.8268e-155
FB.01.PDGFRA	ADAMTS2	4.74027e-204	19.386	0.579	0.259	1.62729e-199
FB.01.PDGFRA	PPFIBP1	1.56029e-288	19.3434	0.764	0.421	5.35631e-284
FB.01.PDGFRA	NKTR	4.25273e-130	19.2466	0.576	0.335	1.45992e-125
FB.01.PDGFRA	ANK3	2.55406e-97	19.1179	0.267	0.102	8.76782e-93
FB.01.PDGFRA	DENND4A	2.6658e-168	19.0448	0.48	0.201	9.15142e-164
FB.01.PDGFRA	GGNBP2	9.71249e-45	19.0441	0.403	0.255	3.3342e-40
FB.01.PDGFRA	DDX60L	5.39538e-60	19.0173	0.318	0.163	1.85218e-55
FB.01.PDGFRA	SRSF10	1.61387e-11	18.9768	0.398	0.316	5.54024e-07
FB.01.PDGFRA	INTS6	8.05996e-86	18.9688	0.424	0.222	2.7669e-81
FB.01.PDGFRA	ARHGDIA	7.71574e-50	18.9508	0.159	0.304	2.64874e-45
FB.01.PDGFRA	DCLK2	6.44859e-37	18.9504	0.31	0.185	2.21374e-32
FB.01.PDGFRA	CLASP2	2.04795e-31	18.8221	0.403	0.28	7.0304e-27
FB.01.PDGFRA	GPD2	9.78799e-110	18.7879	0.327	0.131	3.36012e-105
FB.01.PDGFRA	FIGN	8.37926e-57	18.6415	0.27	0.134	2.87652e-52
FB.01.PDGFRA	MON2	0	18.6298	0.715	0.313	0
FB.01.PDGFRA	HEG1	1.42465e-47	18.5706	0.387	0.238	4.89068e-43
FB.01.PDGFRA	SEC24D	1.89836e-297	18.5309	0.661	0.289	6.51688e-293
FB.01.PDGFRA	ZBTB20	8.46397e-229	18.4557	0.845	0.572	2.9056e-224
FB.01.PDGFRA	TWIST1	1.21482e-119	18.3725	0.308	0.114	4.17035e-115
FB.01.PDGFRA	WNT5A	1.43602e-209	18.3426	0.262	0.047	4.9297e-205
FB.01.PDGFRA	ARFGAP3	7.19471e-11	18.3399	0.308	0.244	2.46987e-06
FB.01.PDGFRA	CDH11	0	18.2659	0.892	0.531	0
FB.01.PDGFRA	STK17B	5.27386e-69	18.2163	0.319	0.158	1.81046e-64
FB.01.PDGFRA	ULK4	8.6376e-171	18.0261	0.424	0.156	2.9652e-166
FB.01.PDGFRA	ARL5A	1.58908e-12	17.9743	0.292	0.224	5.45515e-08
FB.01.PDGFRA	GPR176	1.2321e-25	17.9691	0.273	0.175	4.22966e-21
FB.01.PDGFRA	ZNF10	1.22451e-46	17.9635	0.257	0.131	4.20361e-42
FB.01.PDGFRA	PLA2R1	0	17.882	0.649	0.21	0
FB.01.PDGFRA	UQCRC2	0.00850251	17.8397	0.265	0.291	1
FB.01.PDGFRA	SPON1	0	17.7877	0.315	0.042	0
FB.01.PDGFRA	FBXO11	6.8202e-76	17.7091	0.462	0.268	2.34131e-71
FB.01.PDGFRA	GASK1B	1.2093e-207	17.6724	0.259	0.046	4.15142e-203
FB.01.PDGFRA	DZIP1L	3.60279e-186	17.6504	0.382	0.121	1.2368e-181
FB.01.PDGFRA	PIK3CA	6.18077e-109	17.6497	0.484	0.252	2.1218e-104
FB.01.PDGFRA	NAALADL2	0	17.6068	0.561	0.11	0
FB.01.PDGFRA	NPAS3	1.84505e-130	17.5841	0.254	0.074	6.33387e-126
FB.01.PDGFRA	VPS13B	5.91094e-274	17.5658	0.742	0.365	2.02917e-269
FB.01.PDGFRA	JAK1	7.71418e-52	17.5268	0.699	0.582	2.6482e-47
FB.01.PDGFRA	CFAP69	2.09831e-187	17.4783	0.271	0.059	7.20327e-183
FB.01.PDGFRA	ZNF521	6.85051e-201	17.4604	0.26	0.049	2.35171e-196
FB.01.PDGFRA	TBCK	3.69823e-213	17.3228	0.573	0.24	1.26956e-208
FB.01.PDGFRA	DOCK7	7.64497e-76	17.2788	0.372	0.195	2.62444e-71
FB.01.PDGFRA	ITGA5	1.00837e-61	17.2516	0.333	0.174	3.46165e-57
FB.01.PDGFRA	PRPF4B	6.88219e-26	17.23	0.369	0.262	2.36259e-21
FB.01.PDGFRA	RABGEF1	6.86071e-192	17.2033	0.534	0.23	2.35521e-187
FB.01.PDGFRA	TSHZ3	5.22456e-261	17.1236	0.37	0.083	1.79354e-256
FB.01.PDGFRA	GXYLT2	0	16.9738	0.333	0.046	0
FB.01.PDGFRA	DICER1	2.10125e-95	16.9138	0.544	0.317	7.21339e-91
FB.01.PDGFRA	INPP5A	2.17851e-28	16.7897	0.284	0.177	7.47859e-24
FB.01.PDGFRA	ZMYM2	1.11581e-180	16.7583	0.637	0.334	3.83046e-176
FB.01.PDGFRA	RAP1GDS1	5.71321e-48	16.6982	0.394	0.24	1.96129e-43
FB.01.PDGFRA	TBC1D16	6.57897e-82	16.5495	0.351	0.168	2.25849e-77
FB.01.PDGFRA	INHBA	2.93073e-64	16.5244	0.297	0.149	1.00609e-59
FB.01.PDGFRA	IQSEC1	1.3642e-98	16.4911	0.526	0.308	4.68315e-94
FB.01.PDGFRA	COL5A1	6.40541e-292	16.4557	0.772	0.403	2.19891e-287
FB.01.PDGFRA	ZFYVE16	3.76745e-80	16.4013	0.474	0.274	1.29333e-75
FB.01.PDGFRA	ALDH7A1	3.52461e-53	16.3588	0.297	0.157	1.20996e-48
FB.01.PDGFRA	CCNL1	2.62136e-55	16.3234	0.49	0.322	8.99888e-51
FB.01.PDGFRA	FMNL3	8.69413e-68	16.3226	0.334	0.167	2.98461e-63
FB.01.PDGFRA	CRYBG3	4.12011e-151	16.3019	0.433	0.18	1.41439e-146
FB.01.PDGFRA	USP24	1.1221e-105	16.2938	0.451	0.223	3.85207e-101
FB.01.PDGFRA	STAT3	1.9668e-60	16.2876	0.55	0.389	6.75183e-56
FB.01.PDGFRA	GNB1	3.57747e-13	16.2463	0.511	0.43	1.22811e-08
FB.01.PDGFRA	EP400	1.08181e-113	16.1558	0.41	0.185	3.71376e-109
FB.01.PDGFRA	NEDD9	6.82918e-77	16.141	0.399	0.222	2.34439e-72
FB.01.PDGFRA	BCL6	3.80218e-113	16.0994	0.455	0.224	1.30525e-108
FB.01.PDGFRA	STAT2	1.20694e-174	15.9136	0.559	0.265	4.1433e-170
FB.01.PDGFRA	USP12	3.41265e-61	15.8972	0.366	0.204	1.17153e-56
FB.01.PDGFRA	JAZF1	3.20719e-126	15.7538	0.481	0.233	1.101e-121
FB.01.PDGFRA	RAB11FIP3	3.4315e-91	15.6769	0.283	0.111	1.178e-86
FB.01.PDGFRA	CEP57L1	4.19226e-51	15.6538	0.27	0.137	1.43916e-46
FB.01.PDGFRA	FAM13A	1.43645e-98	15.642	0.493	0.271	4.9312e-94
FB.01.PDGFRA	CLASP1	4.41697e-190	15.6385	0.611	0.298	1.5163e-185
FB.01.PDGFRA	FOXK1	3.44931e-37	15.6333	0.289	0.169	1.18411e-32
FB.01.PDGFRA	CREB1	1.35932e-16	15.5924	0.272	0.195	4.66642e-12
FB.01.PDGFRA	GALNT10	1.13969e-240	15.5627	0.449	0.139	3.91244e-236
FB.01.PDGFRA	TFPI	0.361061	15.5173	0.582	0.579	1
FB.01.PDGFRA	SSH1	2.65333e-279	15.4137	0.586	0.227	9.10863e-275
FB.01.PDGFRA	PARP14	1.34226e-119	15.3647	0.585	0.338	4.60784e-115
FB.01.PDGFRA	CYP20A1	1.80938e-15	15.3487	0.297	0.214	6.21144e-11
FB.01.PDGFRA	TRPC4AP	2.6891e-134	15.2643	0.527	0.266	9.23141e-130
FB.01.PDGFRA	KLF9	3.46852e-36	15.2361	0.455	0.318	1.19071e-31
FB.01.PDGFRA	SLC39A11	1.1515e-163	15.1377	0.437	0.175	3.95299e-159
FB.01.PDGFRA	PXDC1	1.96654e-93	15.0525	0.27	0.103	6.75094e-89
FB.01.PDGFRA	PHF20	2.51811e-13	14.9709	0.358	0.279	8.64442e-09
FB.01.PDGFRA	ARHGEF10	2.27487e-200	14.9686	0.409	0.129	7.80939e-196
FB.01.PDGFRA	LMBR1	3.61928e-31	14.9385	0.286	0.178	1.24246e-26
FB.01.PDGFRA	FAM110B	5.89867e-40	14.9224	0.269	0.152	2.02496e-35
FB.01.PDGFRA	AL158152.1	6.37494e-118	14.8865	0.273	0.09	2.18845e-113
FB.01.PDGFRA	COL4A1	1.68986e-66	14.8428	0.677	0.838	5.80113e-62
FB.01.PDGFRA	NCKAP1	4.78253e-80	14.8043	0.583	0.389	1.64179e-75
FB.01.PDGFRA	DMD	4.03136e-14	14.7374	0.443	0.386	1.38392e-09
FB.01.PDGFRA	MED13L	6.58644e-239	14.731	0.804	0.476	2.26106e-234
FB.01.PDGFRA	NR2F1-AS1	2.11304e-200	14.6957	0.365	0.106	7.25384e-196
FB.01.PDGFRA	PDGFC	4.06042e-201	14.6956	0.385	0.118	1.3939e-196
FB.01.PDGFRA	ADAM19	1.14108e-31	14.6936	0.269	0.165	3.91721e-27
FB.01.PDGFRA	GPCPD1	8.53578e-17	14.6935	0.41	0.314	2.93025e-12
FB.01.PDGFRA	LARGE1	9.07862e-24	14.6932	0.357	0.253	3.1166e-19
FB.01.PDGFRA	HIP1	1.89183e-05	14.6903	0.382	0.413	0.649447
FB.01.PDGFRA	CSNK1G1	1.27025e-73	14.6863	0.39	0.203	4.36065e-69
FB.01.PDGFRA	TENT5A	6.91514e-206	14.6842	0.501	0.2	2.3739e-201
FB.01.PDGFRA	RNF145	3.12443e-18	14.5349	0.378	0.289	1.07259e-13
FB.01.PDGFRA	RFTN1	1.26671e-13	14.4638	0.469	0.384	4.34851e-09
FB.01.PDGFRA	ITCH	1.85404e-132	14.3664	0.566	0.306	6.36474e-128
FB.01.PDGFRA	KDM7A	1.69597e-258	14.3598	0.377	0.088	5.82209e-254
FB.01.PDGFRA	SRRM2	2.46724e-118	14.3536	0.751	0.562	8.4698e-114
FB.01.PDGFRA	SLC25A37	4.07753e-277	14.2913	0.487	0.15	1.39977e-272
FB.01.PDGFRA	EML4	3.18983e-22	14.1325	0.426	0.334	1.09504e-17
FB.01.PDGFRA	GPATCH2	3.09099e-128	14.0908	0.467	0.219	1.06111e-123
FB.01.PDGFRA	WDPCP	9.53562e-143	14.0027	0.442	0.191	3.27348e-138
FB.01.PDGFRA	LRP6	4.40219e-130	13.9232	0.368	0.143	1.51123e-125
FB.01.PDGFRA	PHF21A	5.83422e-237	13.8712	0.603	0.265	2.00283e-232
FB.01.PDGFRA	OSMR-AS1	1.43066e-157	13.8514	0.253	0.06	4.91131e-153
FB.01.PDGFRA	CCDC14	5.93647e-75	13.8467	0.377	0.201	2.03793e-70
FB.01.PDGFRA	PTPDC1	4.16789e-270	13.8268	0.396	0.093	1.4308e-265
FB.01.PDGFRA	PPM1B	7.71918e-20	13.7543	0.257	0.173	2.64992e-15
FB.01.PDGFRA	HDGFL3	1.32282e-64	13.7367	0.383	0.216	4.54109e-60
FB.01.PDGFRA	RBBP6	1.8264e-17	13.7269	0.325	0.241	6.26986e-13
FB.01.PDGFRA	ARIH1	7.40799e-73	13.7203	0.575	0.371	2.54309e-68
FB.01.PDGFRA	VEGFA	1.73033e-64	13.6439	0.269	0.128	5.94006e-60
FB.01.PDGFRA	GANC	8.5903e-91	13.6435	0.285	0.113	2.94896e-86
FB.01.PDGFRA	ZNF609	1.54688e-147	13.5813	0.555	0.271	5.31028e-143
FB.01.PDGFRA	NUTM2A-AS1	4.32134e-95	13.5725	0.269	0.098	1.48347e-90
FB.01.PDGFRA	ERRFI1	1.18346e-131	13.539	0.36	0.146	4.06268e-127
FB.01.PDGFRA	RAB7A	0.920274	13.511	0.424	0.424	1
FB.01.PDGFRA	ANO10	5.62387e-21	13.4537	0.293	0.206	1.93062e-16
FB.01.PDGFRA	ZNF704	4.42157e-68	13.4491	0.317	0.163	1.51788e-63
FB.01.PDGFRA	STRA6	1.41703e-221	13.4276	0.275	0.049	4.86452e-217
FB.01.PDGFRA	DMTF1	3.8649e-196	13.3199	0.579	0.252	1.32678e-191
FB.01.PDGFRA	IFRD1	1.11176e-08	13.2544	0.313	0.256	0.000381657
FB.01.PDGFRA	PPP3CA	2.09026e-252	13.2509	0.626	0.292	7.17565e-248
FB.01.PDGFRA	SYNJ2	1.66897e-173	13.1937	0.271	0.065	5.72942e-169
FB.01.PDGFRA	SYTL4	3.09358e-240	13.0781	0.31	0.06	1.06199e-235
FB.01.PDGFRA	C20orf194	7.96729e-119	12.9384	0.286	0.095	2.73509e-114
FB.01.PDGFRA	TANC1	7.52836e-92	12.9318	0.533	0.318	2.58441e-87
FB.01.PDGFRA	SLC35F5	3.39425e-105	12.8925	0.476	0.249	1.16521e-100
FB.01.PDGFRA	EPC1	1.00423e-85	12.8417	0.549	0.344	3.44743e-81
FB.01.PDGFRA	DNMBP	5.23489e-109	12.8048	0.339	0.136	1.79708e-104
FB.01.PDGFRA	STK38	1.84929e-73	12.8002	0.39	0.217	6.34843e-69
FB.01.PDGFRA	SGPL1	1.46794e-34	12.7794	0.326	0.207	5.03928e-30
FB.01.PDGFRA	MYOF	5.56913e-97	12.7691	0.623	0.415	1.91183e-92
FB.01.PDGFRA	RGL1	6.99345e-40	12.7618	0.302	0.178	2.40078e-35
FB.01.PDGFRA	ANGPT1	6.00468e-32	12.7483	0.3	0.191	2.06134e-27
FB.01.PDGFRA	PTPRE	2.6935e-204	12.6971	0.511	0.212	9.24651e-200
FB.01.PDGFRA	FHL2	6.77713e-141	12.5332	0.567	0.315	2.32652e-136
FB.01.PDGFRA	DDX42	7.49228e-34	12.5321	0.332	0.212	2.57203e-29
FB.01.PDGFRA	GAB2	2.21298e-113	12.5228	0.384	0.169	7.59693e-109
FB.01.PDGFRA	IKZF2	1.11232e-164	12.4956	0.263	0.063	3.81848e-160
FB.01.PDGFRA	MICOS10	2.32229e-64	12.4593	0.179	0.349	7.9722e-60
FB.01.PDGFRA	TSPAN9	4.18764e-65	12.3864	0.434	0.268	1.43757e-60
FB.01.PDGFRA	CREM	4.88309e-39	12.3751	0.296	0.179	1.67632e-34
FB.01.PDGFRA	UNC13B	2.94714e-92	12.3689	0.385	0.187	1.01172e-87
FB.01.PDGFRA	ADAM17	1.25301e-74	12.3287	0.498	0.314	4.30147e-70
FB.01.PDGFRA	DRAM1	2.65945e-132	12.2683	0.322	0.115	9.12962e-128
FB.01.PDGFRA	USP33	2.72838e-149	12.2615	0.542	0.278	9.36627e-145
FB.01.PDGFRA	SMURF2	1.79735e-76	12.2487	0.382	0.203	6.17013e-72
FB.01.PDGFRA	FTO	1.6881e-288	12.2395	0.699	0.308	5.79507e-284
FB.01.PDGFRA	DCBLD1	1.99267e-30	12.2088	0.295	0.186	6.84063e-26
FB.01.PDGFRA	ITPRID2	1.29828e-34	12.1757	0.37	0.25	4.45687e-30
FB.01.PDGFRA	TRIB2	1.90694e-06	12.1753	0.266	0.216	0.0654632
FB.01.PDGFRA	ATG5	4.6854e-28	12.1735	0.298	0.195	1.60845e-23
FB.01.PDGFRA	NUP214	4.86867e-62	12.0886	0.359	0.194	1.67136e-57
FB.01.PDGFRA	SVEP1	8.16158e-118	12.0643	0.311	0.113	2.80179e-113
FB.01.PDGFRA	URB1	3.62136e-200	12.0532	0.332	0.084	1.24318e-195
FB.01.PDGFRA	MAMDC2	6.08434e-295	11.9867	0.335	0.058	2.08869e-290
FB.01.PDGFRA	BBX	3.5218e-16	11.8526	0.475	0.405	1.209e-11
FB.01.PDGFRA	LUC7L2	2.64784e-65	11.838	0.54	0.365	9.08978e-61
FB.01.PDGFRA	CDK14	6.0017e-255	11.8081	0.696	0.33	2.06032e-250
FB.01.PDGFRA	TCEAL4	6.87901e-23	11.8081	0.193	0.281	2.36149e-18
FB.01.PDGFRA	ACBD6	5.18358e-67	11.8079	0.435	0.258	1.77947e-62
FB.01.PDGFRA	LPP	7.83702e-47	11.805	0.725	0.668	2.69037e-42
FB.01.PDGFRA	PTPRK	1.53617e-11	11.8045	0.451	0.506	5.27353e-07
FB.01.PDGFRA	TRMT11	1.96188e-193	11.7955	0.503	0.201	6.73493e-189
FB.01.PDGFRA	RANBP17	3.61268e-67	11.7813	0.276	0.127	1.2402e-62
FB.01.PDGFRA	WDR60	3.45215e-143	11.7811	0.264	0.072	1.18509e-138
FB.01.PDGFRA	CAMK2D	5.90658e-159	11.7368	0.705	0.424	2.02767e-154
FB.01.PDGFRA	RIMKLB	3.03692e-26	11.6896	0.299	0.195	1.04254e-21
FB.01.PDGFRA	LRRC17	6.33987e-150	11.6708	0.264	0.07	2.17642e-145
FB.01.PDGFRA	DHX36	1.35565e-19	11.659	0.351	0.258	4.65381e-15
FB.01.PDGFRA	TRAF5	4.74456e-110	11.6532	0.377	0.166	1.62876e-105
FB.01.PDGFRA	GALK2	9.48433e-143	11.6218	0.405	0.162	3.25587e-138
FB.01.PDGFRA	DNM1L	5.01141e-38	11.6089	0.34	0.212	1.72037e-33
FB.01.PDGFRA	MDM2	1.64918e-117	11.5969	0.473	0.238	5.66148e-113
FB.01.PDGFRA	TMEM135	2.4211e-151	11.5171	0.479	0.207	8.3114e-147
FB.01.PDGFRA	ZNF438	5.24106e-146	11.4824	0.392	0.152	1.7992e-141
FB.01.PDGFRA	PAPLN	1.87989e-219	11.4719	0.263	0.045	6.45347e-215
FB.01.PDGFRA	SUCO	8.01276e-27	11.3884	0.268	0.169	2.7507e-22
FB.01.PDGFRA	AP3B1	4.24368e-148	11.3539	0.316	0.1	1.45681e-143
FB.01.PDGFRA	CHD6	2.15537e-87	11.3503	0.487	0.277	7.39917e-83
FB.01.PDGFRA	ODF2L	8.0308e-279	11.2789	0.667	0.293	2.75689e-274
FB.01.PDGFRA	WASF3	3.48909e-237	11.1812	0.368	0.093	1.19777e-232
FB.01.PDGFRA	MED27	2.94534e-138	11.1497	0.434	0.189	1.01111e-133
FB.01.PDGFRA	ZMAT3	1.30895e-101	11.1093	0.412	0.204	4.49349e-97
FB.01.PDGFRA	CSGALNACT2	3.85559e-115	11.1063	0.39	0.174	1.32359e-110
FB.01.PDGFRA	PARP8	4.43315e-143	11.0656	0.449	0.195	1.52186e-138
FB.01.PDGFRA	ZCCHC14	2.32528e-69	11.0452	0.306	0.147	7.98245e-65
FB.01.PDGFRA	RYK	4.12062e-71	11.0422	0.4	0.223	1.41457e-66
FB.01.PDGFRA	USP40	5.62447e-185	10.9423	0.43	0.154	1.93082e-180
FB.01.PDGFRA	APOLD1	2.56977e-34	10.8855	0.165	0.297	8.82176e-30
FB.01.PDGFRA	NHSL2	1.58414e-133	10.8343	0.465	0.208	5.43821e-129
FB.01.PDGFRA	RUNX1T1	1.2265e-211	10.8326	0.543	0.224	4.21045e-207
FB.01.PDGFRA	PTK2	9.67504e-59	10.676	0.672	0.539	3.32134e-54
FB.01.PDGFRA	MNAT1	2.92718e-155	10.6699	0.621	0.339	1.00487e-150
FB.01.PDGFRA	TBC1D22A	3.03609e-232	10.6526	0.617	0.269	1.04226e-227
FB.01.PDGFRA	ARHGAP6	3.12656e-27	10.5993	0.203	0.318	1.07332e-22
FB.01.PDGFRA	ZNF516	9.16192e-108	10.549	0.329	0.13	3.1452e-103
FB.01.PDGFRA	ITGA11	1.86092e-222	10.5438	0.507	0.195	6.38837e-218
FB.01.PDGFRA	PAXBP1	8.24186e-71	10.5067	0.325	0.16	2.82935e-66
FB.01.PDGFRA	KIF16B	4.46165e-60	10.4785	0.292	0.148	1.53164e-55
FB.01.PDGFRA	ENAH	5.72889e-44	10.478	0.425	0.296	1.96667e-39
FB.01.PDGFRA	SOBP	1.76922e-105	10.4142	0.389	0.177	6.07355e-101
FB.01.PDGFRA	ARID1B	1.39901e-203	10.3825	0.766	0.455	4.80267e-199
FB.01.PDGFRA	SLC4A7	8.75097e-222	10.3659	0.486	0.183	3.00412e-217
FB.01.PDGFRA	FRMD6	1.15148e-188	10.3654	0.552	0.263	3.9529e-184
FB.01.PDGFRA	KLF7	9.50911e-114	10.3652	0.546	0.301	3.26438e-109
FB.01.PDGFRA	ETS1	3.2636e-20	10.3453	0.287	0.387	1.12036e-15
FB.01.PDGFRA	APPBP2	7.77345e-58	10.3259	0.387	0.222	2.66855e-53
FB.01.PDGFRA	RHOJ	1.42476e-93	10.3176	0.454	0.242	4.89104e-89
FB.01.PDGFRA	AGFG1	1.99119e-85	10.2993	0.383	0.191	6.83555e-81
FB.01.PDGFRA	CLMP	0	10.2761	0.357	0.035	0
FB.01.PDGFRA	BASP1	6.22188e-63	10.207	0.288	0.139	2.13591e-58
FB.01.PDGFRA	ADARB1	9.63516e-86	10.1738	0.326	0.146	3.30766e-81
FB.01.PDGFRA	ITGA10	7.80139e-123	10.1672	0.401	0.175	2.67814e-118
FB.01.PDGFRA	COG5	1.36154e-150	10.0732	0.508	0.244	4.67405e-146
FB.01.PDGFRA	SSH2	5.685e-72	10.0315	0.524	0.331	1.9516e-67
FB.01.PDGFRA	WASF2	0.033028	9.94962	0.427	0.445	1
FB.01.PDGFRA	METTL15	1.35049e-207	9.94791	0.57	0.247	4.6361e-203
FB.01.PDGFRA	AEBP2	2.99537e-56	9.91418	0.408	0.247	1.02828e-51
FB.01.PDGFRA	HCG18	2.28548e-107	9.90645	0.317	0.124	7.84583e-103
FB.01.PDGFRA	MYCBP2	3.27989e-143	9.88618	0.655	0.385	1.12595e-138
FB.01.PDGFRA	UST	5.92143e-83	9.85095	0.394	0.2	2.03277e-78
FB.01.PDGFRA	SACS	2.6025e-80	9.76355	0.318	0.145	8.93412e-76
FB.01.PDGFRA	ZCCHC24	6.83811e-192	9.67052	0.399	0.131	2.34746e-187
FB.01.PDGFRA	ADAMTS9-AS2	1.09015e-114	9.65828	0.268	0.087	3.74237e-110
FB.01.PDGFRA	MYO5A	5.56171e-99	9.59843	0.321	0.134	1.90928e-94
FB.01.PDGFRA	KCNQ1OT1	4.75716e-249	9.58357	0.509	0.177	1.63309e-244
FB.01.PDGFRA	MLXIP	5.98428e-128	9.51064	0.348	0.131	2.05434e-123
FB.01.PDGFRA	COL13A1	0	9.48372	0.424	0.071	0
FB.01.PDGFRA	LRRK1	4.8089e-194	9.43926	0.281	0.06	1.65085e-189
FB.01.PDGFRA	TENT2	1.5549e-172	9.43492	0.562	0.263	5.33781e-168
FB.01.PDGFRA	PTPN9	2.20626e-87	9.40167	0.443	0.236	7.57388e-83
FB.01.PDGFRA	SLC1A1	6.70323e-111	9.29347	0.273	0.095	2.30115e-106
FB.01.PDGFRA	EPS15	3.06863e-138	9.2641	0.588	0.315	1.05343e-133
FB.01.PDGFRA	NINL	2.47828e-193	9.20431	0.379	0.113	8.50768e-189
FB.01.PDGFRA	OGA	4.73091e-114	9.18979	0.588	0.347	1.62408e-109
FB.01.PDGFRA	TEX41	4.34276e-25	9.18751	0.273	0.174	1.49083e-20
FB.01.PDGFRA	UHRF2	1.72282e-93	9.10541	0.384	0.182	5.91427e-89
FB.01.PDGFRA	KSR1	1.54918e-123	9.03991	0.373	0.155	5.3182e-119
FB.01.PDGFRA	USP32	1.57585e-191	8.97742	0.526	0.224	5.40972e-187
FB.01.PDGFRA	NDEL1	1.41652e-85	8.96965	0.312	0.137	4.86278e-81
FB.01.PDGFRA	KANSL1L	2.20383e-122	8.96194	0.499	0.254	7.56552e-118
FB.01.PDGFRA	PKP2	1.23243e-213	8.93526	0.258	0.045	4.2308e-209
FB.01.PDGFRA	PVT1	4.98152e-153	8.92134	0.375	0.136	1.71011e-148
FB.01.PDGFRA	SPPL3	6.78829e-15	8.91821	0.301	0.225	2.33035e-10
FB.01.PDGFRA	PDS5B	8.54797e-80	8.91028	0.552	0.351	2.93443e-75
FB.01.PDGFRA	YME1L1	1.14112e-14	8.90011	0.348	0.271	3.91734e-10
FB.01.PDGFRA	RAPGEF6	5.87304e-90	8.878	0.404	0.204	2.01616e-85
FB.01.PDGFRA	MIS18BP1	1.03544e-40	8.84497	0.304	0.177	3.55456e-36
FB.01.PDGFRA	CPLANE1	2.82032e-196	8.83613	0.589	0.269	9.68189e-192
FB.01.PDGFRA	PPP4R2	6.10928e-56	8.78765	0.384	0.221	2.09725e-51
FB.01.PDGFRA	SARNP	1.86565e-21	8.78367	0.315	0.217	6.4046e-17
FB.01.PDGFRA	POU2F1	1.05493e-133	8.75839	0.478	0.227	3.62146e-129
FB.01.PDGFRA	SHOC2	6.12751e-42	8.75726	0.386	0.245	2.10351e-37
FB.01.PDGFRA	CDYL	7.14091e-40	8.73701	0.282	0.162	2.4514e-35
FB.01.PDGFRA	SLC39A10	4.72582e-59	8.71922	0.31	0.162	1.62233e-54
FB.01.PDGFRA	SMG7	0.00293048	8.61949	0.258	0.228	1
FB.01.PDGFRA	CLK4	2.18349e-162	8.55924	0.388	0.136	7.49571e-158
FB.01.PDGFRA	ECE1	0.492311	8.5577	0.459	0.466	1
FB.01.PDGFRA	HIPK3	1.39804e-144	8.46977	0.553	0.291	4.79935e-140
FB.01.PDGFRA	SCFD2	2.58215e-261	8.46974	0.539	0.185	8.86428e-257
FB.01.PDGFRA	PPM1K	1.30419e-18	8.44948	0.251	0.17	4.47716e-14
FB.01.PDGFRA	FAM214A	3.49472e-151	8.43264	0.263	0.068	1.1997e-146
FB.01.PDGFRA	GATAD2B	5.24968e-47	8.37609	0.348	0.208	1.80216e-42
FB.01.PDGFRA	SLC46A3	2.53018e-141	8.36975	0.268	0.077	8.68586e-137
FB.01.PDGFRA	INSIG2	1.92317e-101	8.36646	0.289	0.111	6.60206e-97
FB.01.PDGFRA	SENP6	1.17896e-112	8.3379	0.599	0.365	4.04725e-108
FB.01.PDGFRA	SAMD9L	2.07832e-35	8.16924	0.29	0.174	7.13468e-31
FB.01.PDGFRA	TMEM260	4.55987e-161	8.09667	0.365	0.125	1.56536e-156
FB.01.PDGFRA	XAF1	1.23124e-135	8.08227	0.531	0.271	4.22673e-131
FB.01.PDGFRA	EPHA3	5.23132e-212	8.07122	0.524	0.213	1.79586e-207
FB.01.PDGFRA	BTRC	4.58257e-158	8.06181	0.466	0.193	1.57315e-153
FB.01.PDGFRA	VPS41	4.88524e-131	8.05979	0.477	0.23	1.67705e-126
FB.01.PDGFRA	STAU2	1.22481e-11	8.04727	0.29	0.225	4.20464e-07
FB.01.PDGFRA	LOXL2	5.2449e-25	8.01883	0.385	0.276	1.80052e-20
FB.01.PDGFRA	FGGY	6.3172e-164	8.00307	0.293	0.081	2.16863e-159
FB.01.PDGFRA	RANBP9	2.08815e-125	7.9434	0.403	0.175	7.16841e-121
FB.01.PDGFRA	CAPN7	9.41788e-151	7.92222	0.449	0.189	3.23306e-146
FB.01.PDGFRA	SLC38A6	2.23468e-173	7.91584	0.465	0.184	7.67144e-169
FB.01.PDGFRA	ITSN2	2.18479e-38	7.90997	0.31	0.188	7.50016e-34
FB.01.PDGFRA	DYNC2H1	6.45368e-297	7.90449	0.569	0.195	2.21548e-292
FB.01.PDGFRA	HEATR5A	6.52815e-143	7.89998	0.414	0.169	2.24105e-138
FB.01.PDGFRA	AGO2	3.8115e-18	7.87542	0.33	0.244	1.30845e-13
FB.01.PDGFRA	LIMA1	1.93753e-96	7.87308	0.623	0.417	6.65136e-92
FB.01.PDGFRA	MOB1B	2.82606e-08	7.80781	0.252	0.194	0.000970158
FB.01.PDGFRA	SPATA6	7.01494e-263	7.78483	0.536	0.191	2.40816e-258
FB.01.PDGFRA	WDR7	1.20901e-107	7.76853	0.437	0.21	4.1504e-103
FB.01.PDGFRA	FBXO42	2.76651e-153	7.75714	0.404	0.154	9.49717e-149
FB.01.PDGFRA	DZIP1	7.6484e-141	7.74758	0.386	0.151	2.62562e-136
FB.01.PDGFRA	STXBP5	0	7.72173	0.656	0.235	0
FB.01.PDGFRA	LENG8	7.66543e-215	7.71746	0.52	0.202	2.63147e-210
FB.01.PDGFRA	ZIC1	4.13287e-55	7.61866	0.507	0.346	1.41877e-50
FB.01.PDGFRA	PRDM2	1.84342e-155	7.61434	0.481	0.211	6.32827e-151
FB.01.PDGFRA	FAM172A	1.92386e-208	7.59381	0.651	0.323	6.60442e-204
FB.01.PDGFRA	JARID2	2.64972e-06	7.54994	0.265	0.221	0.0909622
FB.01.PDGFRA	PNISR	9.36662e-86	7.53791	0.64	0.436	3.21547e-81
FB.01.PDGFRA	ALDH1L2	1.29936e-202	7.52608	0.312	0.074	4.46056e-198
FB.01.PDGFRA	FIP1L1	3.0762e-141	7.50304	0.406	0.164	1.05603e-136
FB.01.PDGFRA	XRN1	9.85176e-148	7.4799	0.574	0.305	3.38201e-143
FB.01.PDGFRA	CEP170	2.3697e-83	7.41703	0.494	0.286	8.13493e-79
FB.01.PDGFRA	ANKRD12	6.47708e-31	7.41364	0.494	0.372	2.22352e-26
FB.01.PDGFRA	MAPKAPK2	6.59732e-30	7.40649	0.327	0.213	2.26479e-25
FB.01.PDGFRA	YTHDC1	1.48354e-14	7.40503	0.36	0.275	5.09286e-10
FB.01.PDGFRA	CSMD2	5.05582e-265	7.39831	0.27	0.035	1.73561e-260
FB.01.PDGFRA	MSRB3	3.65003e-61	7.38427	0.493	0.329	1.25302e-56
FB.01.PDGFRA	OLA1	0.002409	7.3813	0.285	0.258	1
FB.01.PDGFRA	PRKN	7.06823e-148	7.35185	0.507	0.237	2.42645e-143
FB.01.PDGFRA	FAM20C	8.09804e-30	7.3358	0.259	0.16	2.77998e-25
FB.01.PDGFRA	CFDP1	4.65057e-16	7.29511	0.404	0.324	1.59649e-11
FB.01.PDGFRA	STRN3	5.2961e-63	7.2883	0.481	0.296	1.8181e-58
FB.01.PDGFRA	SFXN5	3.89e-183	7.25782	0.34	0.097	1.3354e-178
FB.01.PDGFRA	PXK	2.57791e-83	7.25288	0.31	0.136	8.84972e-79
FB.01.PDGFRA	USP48	2.75313e-86	7.23873	0.485	0.278	9.45121e-82
FB.01.PDGFRA	DCTN4	4.26797e-81	7.22501	0.353	0.173	1.46515e-76
FB.01.PDGFRA	BCKDHB	1.33641e-109	7.21858	0.333	0.133	4.58776e-105
FB.01.PDGFRA	PXYLP1	2.08542e-77	7.19403	0.267	0.114	7.15904e-73
FB.01.PDGFRA	TAB2	4.34751e-163	7.09539	0.441	0.176	1.49246e-158
FB.01.PDGFRA	WBP1L	1.32936e-107	7.08987	0.38	0.172	4.56357e-103
FB.01.PDGFRA	TFG	5.33242e-85	7.06529	0.459	0.266	1.83056e-80
FB.01.PDGFRA	PUM2	1.64821e-59	7.04896	0.497	0.319	5.65814e-55
FB.01.PDGFRA	ATP9A	2.10188e-138	7.04683	0.351	0.129	7.21554e-134
FB.01.PDGFRA	ARFGEF1	8.20447e-71	7.04657	0.483	0.296	2.81651e-66
FB.01.PDGFRA	GBF1	1.50393e-127	7.03936	0.512	0.26	5.16286e-123
FB.01.PDGFRA	EFHC1	5.09537e-74	6.97474	0.332	0.161	1.74919e-69
FB.01.PDGFRA	TRPC1	3.31843e-157	6.95754	0.468	0.197	1.13919e-152
FB.01.PDGFRA	CCDC7	4.70409e-183	6.92322	0.428	0.152	1.61487e-178
FB.01.PDGFRA	CHD9	2.31281e-286	6.91983	0.814	0.483	7.93964e-282
FB.01.PDGFRA	NIBAN2	7.7948e-17	6.91803	0.254	0.179	2.67588e-12
FB.01.PDGFRA	AP3S1	1.18698e-129	6.91768	0.263	0.078	4.07479e-125
FB.01.PDGFRA	PRDM5	7.7219e-294	6.89818	0.368	0.071	2.65085e-289
FB.01.PDGFRA	CCDC88A	4.03669e-58	6.74257	0.426	0.256	1.38576e-53
FB.01.PDGFRA	ZNF292	2.74288e-74	6.73074	0.46	0.279	9.41604e-70
FB.01.PDGFRA	SUPT3H	3.47072e-138	6.68889	0.473	0.22	1.19146e-133
FB.01.PDGFRA	PMM2	1.32114e-177	6.63852	0.432	0.157	4.53536e-173
FB.01.PDGFRA	EVC2	6.08848e-231	6.6184	0.353	0.084	2.09011e-226
FB.01.PDGFRA	SH3D19	0	6.55824	0.661	0.249	0
FB.01.PDGFRA	AZI2	5.03166e-66	6.5358	0.3	0.147	1.72732e-61
FB.01.PDGFRA	QKI	8.00984e-35	6.52235	0.611	0.488	2.7497e-30
FB.01.PDGFRA	DENND5B	6.43821e-144	6.51042	0.292	0.089	2.21017e-139
FB.01.PDGFRA	APC	2.06947e-40	6.44763	0.371	0.232	7.10428e-36
FB.01.PDGFRA	PDGFA	2.56824e-38	6.42943	0.153	0.279	8.81653e-34
FB.01.PDGFRA	HERC2	7.34203e-167	6.42022	0.641	0.349	2.52045e-162
FB.01.PDGFRA	OXSR1	2.37279e-42	6.37915	0.265	0.146	8.14554e-38
FB.01.PDGFRA	MCPH1	2.1731e-130	6.3485	0.439	0.194	7.46002e-126
FB.01.PDGFRA	COG6	8.55741e-190	6.34418	0.398	0.13	2.93767e-185
FB.01.PDGFRA	CEMIP2	1.16516e-81	6.33632	0.402	0.213	3.99988e-77
FB.01.PDGFRA	NEO1	9.07914e-135	6.30572	0.4	0.165	3.11678e-130
FB.01.PDGFRA	CHST15	3.195e-266	6.29688	0.42	0.109	1.09681e-261
FB.01.PDGFRA	SLC2A13	1.57242e-126	6.28519	0.344	0.131	5.39798e-122
FB.01.PDGFRA	TTC21B	6.34652e-75	6.27996	0.348	0.167	2.1787e-70
FB.01.PDGFRA	RAB5A	7.47328e-10	6.26051	0.284	0.219	2.5655e-05
FB.01.PDGFRA	TNFRSF19	2.81975e-130	6.24375	0.313	0.107	9.67992e-126
FB.01.PDGFRA	NDUFAF2	2.19691e-44	6.22694	0.313	0.182	7.54177e-40
FB.01.PDGFRA	XPO6	7.75366e-37	6.22585	0.271	0.155	2.66176e-32
FB.01.PDGFRA	MINDY3	2.9447e-124	6.19671	0.41	0.178	1.01089e-119
FB.01.PDGFRA	RSRC1	2.06082e-36	6.18666	0.361	0.235	7.07461e-32
FB.01.PDGFRA	CLCN3	6.10727e-28	6.17513	0.278	0.175	2.09656e-23
FB.01.PDGFRA	BMPR2	1.09539e-116	6.13444	0.609	0.378	3.76036e-112
FB.01.PDGFRA	PLEKHG1	1.81041e-205	6.07451	0.528	0.217	6.21496e-201
FB.01.PDGFRA	TRAPPC9	5.76672e-51	6.07445	0.37	0.218	1.97966e-46
FB.01.PDGFRA	RUSC2	1.25411e-154	6.07438	0.474	0.203	4.30524e-150
FB.01.PDGFRA	ANKLE2	1.28818e-40	6.05737	0.366	0.227	4.42221e-36
FB.01.PDGFRA	SLC2A3	9.76061e-06	6.03729	0.316	0.28	0.335072
FB.01.PDGFRA	AGAP1	1.02484e-13	6.03374	0.536	0.433	3.51817e-09
FB.01.PDGFRA	FYN	5.81886e-82	6.03016	0.538	0.342	1.99756e-77
FB.01.PDGFRA	RAB21	2.1804e-38	6.00959	0.307	0.186	7.4851e-34
FB.01.PDGFRA	PIK3R1	1.16581e-55	5.97937	0.483	0.329	4.00209e-51
FB.01.PDGFRA	LRIG3	1.9354e-175	5.9791	0.292	0.074	6.64402e-171
FB.01.PDGFRA	PDE5A	4.49184e-05	5.97302	0.475	0.408	1
FB.01.PDGFRA	CTBP2	7.22621e-09	5.91594	0.371	0.311	0.000248069
FB.01.PDGFRA	ZNF148	1.11489e-64	5.91292	0.501	0.318	3.82732e-60
FB.01.PDGFRA	SLC12A6	1.69001e-112	5.91041	0.263	0.087	5.80165e-108
FB.01.PDGFRA	TBC1D19	1.25688e-204	5.88685	0.482	0.179	4.31474e-200
FB.01.PDGFRA	SNX9	1.01922e-247	5.85756	0.546	0.217	3.49889e-243
FB.01.PDGFRA	AGPS	7.16303e-114	5.84519	0.395	0.177	2.459e-109
FB.01.PDGFRA	RAP1A	2.99477e-47	5.83469	0.463	0.315	1.02807e-42
FB.01.PDGFRA	TLE4	2.91299e-25	5.80974	0.348	0.244	1e-20
FB.01.PDGFRA	CLK1	1.89616e-75	5.80775	0.464	0.269	6.50933e-71
FB.01.PDGFRA	ARHGAP18	3.44049e-24	5.78453	0.263	0.17	1.18109e-19
FB.01.PDGFRA	CPNE8	1.67839e-115	5.74645	0.325	0.124	5.76175e-111
FB.01.PDGFRA	USP31	5.56019e-75	5.7058	0.265	0.113	1.90876e-70
FB.01.PDGFRA	INVS	1.42727e-116	5.69343	0.497	0.25	4.89968e-112
FB.01.PDGFRA	ALDH18A1	9.07279e-111	5.6806	0.269	0.09	3.1146e-106
FB.01.PDGFRA	HGSNAT	1.8892e-42	5.64878	0.353	0.22	6.48542e-38
FB.01.PDGFRA	PDZD8	1.05108e-35	5.64864	0.288	0.169	3.60825e-31
FB.01.PDGFRA	RFTN2	3.97313e-114	5.64372	0.417	0.192	1.36394e-109
FB.01.PDGFRA	PRKCE	2.93314e-118	5.61876	0.437	0.206	1.00692e-113
FB.01.PDGFRA	RCL1	1.5754e-177	5.58669	0.325	0.091	5.4082e-173
FB.01.PDGFRA	EEA1	3.28809e-128	5.5469	0.549	0.297	1.12877e-123
FB.01.PDGFRA	XIST	4.73512e-75	5.5403	0.526	0.388	1.62552e-70
FB.01.PDGFRA	GNA12	2.83104e-76	5.52446	0.385	0.201	9.71869e-72
FB.01.PDGFRA	ACSS3	1.81687e-260	5.5191	0.581	0.23	6.23713e-256
FB.01.PDGFRA	UBR2	3.81476e-122	5.462	0.523	0.274	1.30957e-117
FB.01.PDGFRA	PARP12	2.99504e-74	5.44633	0.269	0.114	1.02817e-69
FB.01.PDGFRA	VPS37A	7.16845e-54	5.42605	0.307	0.161	2.46086e-49
FB.01.PDGFRA	CNOT4	4.55131e-54	5.41423	0.435	0.268	1.56242e-49
FB.01.PDGFRA	RALGAPB	6.24589e-96	5.40563	0.41	0.199	2.14415e-91
FB.01.PDGFRA	AGPAT4	5.44532e-66	5.40227	0.253	0.111	1.86933e-61
FB.01.PDGFRA	EHBP1	3.07073e-155	5.40097	0.484	0.221	1.05415e-150
FB.01.PDGFRA	RALGAPA2	1.95872e-125	5.31775	0.368	0.148	6.72408e-121
FB.01.PDGFRA	AC118549.1	7.00754e-97	5.31236	0.258	0.091	2.40562e-92
FB.01.PDGFRA	DDHD1	2.86223e-141	5.27609	0.374	0.141	9.82574e-137
FB.01.PDGFRA	EVA1C	1.75908e-84	5.27482	0.383	0.194	6.03874e-80
FB.01.PDGFRA	CDKL1	1.11331e-74	5.2703	0.263	0.112	3.82188e-70
FB.01.PDGFRA	C1RL	5.86317e-240	5.23168	0.412	0.114	2.01277e-235
FB.01.PDGFRA	PPP3CB	2.73698e-164	5.22538	0.512	0.227	9.39576e-160
FB.01.PDGFRA	SMARCA5	1.25017e-09	5.18869	0.319	0.253	4.29171e-05
FB.01.PDGFRA	CDK5RAP2	4.96885e-42	5.18542	0.286	0.16	1.70576e-37
FB.01.PDGFRA	ZNF638	2.3721e-256	5.16008	0.751	0.392	8.14318e-252
FB.01.PDGFRA	WDR11	4.88554e-145	5.14676	0.409	0.163	1.67716e-140
FB.01.PDGFRA	ANKAR	2.02067e-131	5.1416	0.353	0.131	6.93677e-127
FB.01.PDGFRA	TBC1D32	3.72891e-145	5.14151	0.34	0.117	1.2801e-140
FB.01.PDGFRA	TARBP1	1.49666e-93	5.07825	0.26	0.096	5.13789e-89
FB.01.PDGFRA	TTC7A	1.60534e-167	5.05978	0.345	0.108	5.51097e-163
FB.01.PDGFRA	PTK7	2.24488e-66	5.02871	0.316	0.157	7.70646e-62
FB.01.PDGFRA	CGGBP1	0.526539	5.02531	0.253	0.247	1
FB.01.PDGFRA	GARS-DT	5.90886e-146	5.01897	0.281	0.08	2.02845e-141
FB.01.PDGFRA	XPC	6.25415e-86	5.00055	0.33	0.149	2.14699e-81
FB.01.PDGFRA	CCSER2	2.26995e-26	4.9925	0.459	0.345	7.79251e-22
FB.01.PDGFRA	SETD7	6.13299e-114	4.98907	0.316	0.119	2.1054e-109
FB.01.PDGFRA	POM121	2.67916e-33	4.98523	0.287	0.173	9.19729e-29
FB.01.PDGFRA	PLEKHM3	9.62804e-83	4.97315	0.263	0.104	3.30521e-78
FB.01.PDGFRA	STIM2	1.53258e-77	4.9695	0.318	0.148	5.2612e-73
FB.01.PDGFRA	MAST2	2.37079e-94	4.96542	0.385	0.182	8.13867e-90
FB.01.PDGFRA	PTPN12	5.10424e-64	4.95769	0.575	0.394	1.75224e-59
FB.01.PDGFRA	SPG11	1.38231e-127	4.94981	0.47	0.218	4.74534e-123
FB.01.PDGFRA	TRPM7	4.60043e-231	4.88623	0.567	0.233	1.57928e-226
FB.01.PDGFRA	PHLPP1	5.03162e-11	4.85825	0.287	0.22	1.72731e-06
FB.01.PDGFRA	FUT8	6.2345e-138	4.822	0.46	0.209	2.14024e-133
FB.01.PDGFRA	CEP126	2.11726e-230	4.81375	0.353	0.086	7.26835e-226
FB.01.PDGFRA	GAK	1.09455e-42	4.81364	0.266	0.144	3.75749e-38
FB.01.PDGFRA	CEP85L	2.10652e-76	4.79604	0.428	0.236	7.23146e-72
FB.01.PDGFRA	FAM120B	1.23648e-231	4.78065	0.57	0.225	4.2447e-227
FB.01.PDGFRA	PHF14	6.3739e-148	4.76541	0.607	0.335	2.1881e-143
FB.01.PDGFRA	RAB8B	8.42354e-33	4.74757	0.296	0.182	2.89172e-28
FB.01.PDGFRA	FARS2	3.71043e-108	4.73376	0.475	0.241	1.27375e-103
FB.01.PDGFRA	STAG1	1.96229e-168	4.73047	0.674	0.383	6.73635e-164
FB.01.PDGFRA	IFI44	6.09586e-72	4.7262	0.441	0.255	2.09265e-67
FB.01.PDGFRA	ARFGEF2	1.49758e-51	4.72539	0.322	0.18	5.14103e-47
FB.01.PDGFRA	BRD4	5.01805e-58	4.69228	0.504	0.335	1.72265e-53
FB.01.PDGFRA	ETV1	5.46448e-56	4.66991	0.312	0.171	1.8759e-51
FB.01.PDGFRA	MBD5	2.33506e-254	4.66899	0.737	0.376	8.01604e-250
FB.01.PDGFRA	MLLT10	1.33551e-179	4.63744	0.574	0.271	4.58467e-175
FB.01.PDGFRA	DNAJC13	2.17763e-70	4.62642	0.389	0.21	7.4756e-66
FB.01.PDGFRA	PBX1	3.88414e-96	4.62128	0.474	0.273	1.33339e-91
FB.01.PDGFRA	CPED1	1.05886e-165	4.60785	0.408	0.154	3.63497e-161
FB.01.PDGFRA	RNF144A	1.3189e-142	4.60318	0.328	0.113	4.52765e-138
FB.01.PDGFRA	RNF213	7.48095e-48	4.59542	0.57	0.411	2.56813e-43
FB.01.PDGFRA	CLIP1	4.12464e-36	4.59462	0.345	0.223	1.41595e-31
FB.01.PDGFRA	ZFAND3	1.00684e-110	4.59368	0.688	0.469	3.45638e-106
FB.01.PDGFRA	KCTD3	3.36669e-133	4.59342	0.368	0.142	1.15575e-128
FB.01.PDGFRA	CSPP1	4.96825e-42	4.5655	0.318	0.188	1.70555e-37
FB.01.PDGFRA	KDM4C	3.33295e-131	4.5573	0.445	0.2	1.14417e-126
FB.01.PDGFRA	MAP4K3-DT	2.64764e-96	4.55682	0.311	0.13	9.08908e-92
FB.01.PDGFRA	MINDY4	1.36396e-192	4.52834	0.285	0.063	4.68235e-188
FB.01.PDGFRA	RLF	6.79334e-68	4.49275	0.388	0.21	2.33209e-63
FB.01.PDGFRA	MED15	1.46198e-56	4.48985	0.336	0.182	5.01882e-52
FB.01.PDGFRA	BMP1	1.81692e-10	4.48059	0.353	0.283	6.2373e-06
FB.01.PDGFRA	DHX15	3.55031e-37	4.47336	0.353	0.224	1.21879e-32
FB.01.PDGFRA	RBM6	6.98782e-120	4.47264	0.626	0.367	2.39885e-115
FB.01.PDGFRA	TMEM263	2.05807e-74	4.4467	0.402	0.222	7.06515e-70
FB.01.PDGFRA	ZNF420	9.48536e-111	4.43725	0.289	0.102	3.25623e-106
FB.01.PDGFRA	PGM3	2.37385e-150	4.40602	0.334	0.108	8.14917e-146
FB.01.PDGFRA	STIM1	1.0109e-110	4.4038	0.456	0.23	3.4703e-106
FB.01.PDGFRA	MKLN1	1.34445e-125	4.37291	0.69	0.427	4.61537e-121
FB.01.PDGFRA	PNPLA8	1.132e-29	4.36566	0.301	0.193	3.88606e-25
FB.01.PDGFRA	TPCN1	7.54034e-121	4.36061	0.395	0.17	2.58852e-116
FB.01.PDGFRA	ROCK1	2.20575e-50	4.34271	0.594	0.423	7.5721e-46
FB.01.PDGFRA	HERC1	1.87679e-183	4.33607	0.617	0.308	6.44285e-179
FB.01.PDGFRA	ZFYVE9	1.51493e-135	4.32225	0.374	0.141	5.20061e-131
FB.01.PDGFRA	SOS2	3.18355e-114	4.28545	0.519	0.269	1.09288e-109
FB.01.PDGFRA	PPP1R10	2.35086e-25	4.27102	0.356	0.243	8.07028e-21
FB.01.PDGFRA	ZNF518A	8.94716e-27	4.25597	0.293	0.192	3.07147e-22
FB.01.PDGFRA	RAB28	2.38027e-115	4.24977	0.431	0.204	8.17124e-111
FB.01.PDGFRA	EWSR1	6.48941e-50	4.23631	0.458	0.299	2.22775e-45
FB.01.PDGFRA	RASA1	5.44928e-107	4.2123	0.495	0.264	1.87068e-102
FB.01.PDGFRA	CSPG4	3.27507e-127	4.17274	0.067	0.308	1.1243e-122
FB.01.PDGFRA	NOD1	1.02495e-142	4.15507	0.276	0.079	3.51856e-138
FB.01.PDGFRA	PPP6R3	4.18858e-68	4.12811	0.517	0.325	1.4379e-63
FB.01.PDGFRA	TVP23C	8.54638e-183	4.11178	0.41	0.14	2.93389e-178
FB.01.PDGFRA	PPP2R2A	9.24162e-17	4.08528	0.351	0.267	3.17256e-12
FB.01.PDGFRA	TTC28	0	4.07158	0.772	0.354	0
FB.01.PDGFRA	PTBP3	1.21589e-25	4.05878	0.372	0.266	4.17404e-21
FB.01.PDGFRA	STAM	1.63267e-96	4.04433	0.291	0.114	5.60478e-92
FB.01.PDGFRA	SMC5	1.61251e-107	4.02468	0.557	0.317	5.53559e-103
FB.01.PDGFRA	LARP4B	9.98644e-78	4.0193	0.405	0.22	3.42824e-73
FB.01.PDGFRA	SLK	1.10847e-72	4.01589	0.349	0.177	3.80527e-68
FB.01.PDGFRA	CREB3L2	8.74058e-77	4.01528	0.447	0.273	3.00055e-72
FB.01.PDGFRA	TRAPPC12	3.2705e-112	4.002	0.407	0.185	1.12273e-107
FB.01.PDGFRA	GMDS-DT	3.32062e-171	3.98467	0.505	0.218	1.13994e-166
FB.01.PDGFRA	TRERF1	1.49466e-61	3.95984	0.298	0.148	5.13103e-57
FB.01.PDGFRA	CEP95	5.35953e-65	3.95868	0.315	0.158	1.83987e-60
FB.01.PDGFRA	TRAPPC8	1.13802e-70	3.92507	0.334	0.165	3.9067e-66
FB.01.PDGFRA	MSH3	4.06633e-135	3.92206	0.404	0.164	1.39593e-130
FB.01.PDGFRA	SGMS1	3.07473e-34	3.90455	0.388	0.258	1.05552e-29
FB.01.PDGFRA	KPNA3	9.47553e-63	3.87668	0.354	0.189	3.25285e-58
FB.01.PDGFRA	NUP58	3.68714e-62	3.87419	0.337	0.177	1.26576e-57
FB.01.PDGFRA	MYO6	2.1229e-38	3.86946	0.491	0.355	7.28772e-34
FB.01.PDGFRA	TTC8	2.30567e-159	3.86743	0.348	0.114	7.91514e-155
FB.01.PDGFRA	NSD1	1.32411e-64	3.86681	0.491	0.312	4.54554e-60
FB.01.PDGFRA	CEP83	2.18402e-90	3.86169	0.263	0.101	7.49752e-86
FB.01.PDGFRA	SNX24	2.63219e-172	3.85959	0.39	0.134	9.03604e-168
FB.01.PDGFRA	NECTIN3	1.35743e-120	3.85007	0.353	0.141	4.65991e-116
FB.01.PDGFRA	KDM2A	1.49059e-86	3.79911	0.478	0.273	5.11704e-82
FB.01.PDGFRA	TOM1L2	7.57043e-132	3.79709	0.385	0.154	2.59885e-127
FB.01.PDGFRA	CBFA2T2	5.94113e-52	3.7869	0.311	0.17	2.03953e-47
FB.01.PDGFRA	CASC4	4.71346e-129	3.76709	0.264	0.079	1.61809e-124
FB.01.PDGFRA	GPR173	5.00837e-188	3.7641	0.349	0.1	1.71932e-183
FB.01.PDGFRA	CDC14B	6.90174e-41	3.74783	0.348	0.214	2.3693e-36
FB.01.PDGFRA	TERF2IP	0.904103	3.73653	0.277	0.274	1
FB.01.PDGFRA	UBE2Q2	1.57543e-51	3.73465	0.353	0.206	5.4083e-47
FB.01.PDGFRA	ZNF280D	1.8444e-97	3.70805	0.492	0.27	6.33165e-93
FB.01.PDGFRA	USO1	7.73706e-136	3.70113	0.526	0.264	2.65606e-131
FB.01.PDGFRA	XPO7	7.80434e-68	3.68077	0.295	0.14	2.67915e-63
FB.01.PDGFRA	TRAPPC10	5.89492e-89	3.66485	0.421	0.213	2.02367e-84
FB.01.PDGFRA	MBD2	1.6255e-75	3.65525	0.38	0.196	5.58017e-71
FB.01.PDGFRA	VPS13A	3.22256e-126	3.6392	0.382	0.156	1.10627e-121
FB.01.PDGFRA	EMSY	1.117e-51	3.62361	0.304	0.162	3.83456e-47
FB.01.PDGFRA	FOXJ3	1.80418e-88	3.59499	0.454	0.245	6.19357e-84
FB.01.PDGFRA	ALG13	2.19644e-116	3.58662	0.469	0.233	7.54016e-112
FB.01.PDGFRA	NHS	2.28941e-122	3.58644	0.507	0.256	7.85932e-118
FB.01.PDGFRA	NBAS	5.0067e-264	3.58606	0.637	0.275	1.71875e-259
FB.01.PDGFRA	DLGAP4	9.63677e-14	3.56363	0.354	0.274	3.30821e-09
FB.01.PDGFRA	ERI3	1.47511e-29	3.51859	0.322	0.21	5.06391e-25
FB.01.PDGFRA	DENND1A	1.47202e-83	3.51189	0.417	0.219	5.0533e-79
FB.01.PDGFRA	ZNF451	2.76334e-138	3.46745	0.456	0.203	9.48629e-134
FB.01.PDGFRA	ATG2B	5.93541e-141	3.44761	0.406	0.161	2.03757e-136
FB.01.PDGFRA	POT1	1.11769e-87	3.43182	0.282	0.115	3.8369e-83
FB.01.PDGFRA	ATP11C	2.47542e-36	3.4259	0.297	0.18	8.49787e-32
FB.01.PDGFRA	TDRD3	9.78647e-127	3.41685	0.388	0.16	3.3596e-122
FB.01.PDGFRA	SGK3	1.65259e-110	3.41382	0.321	0.126	5.67317e-106
FB.01.PDGFRA	SEPTIN10	7.33411e-30	3.41115	0.328	0.217	2.51773e-25
FB.01.PDGFRA	GABBR1	9.54174e-28	3.40917	0.283	0.181	3.27559e-23
FB.01.PDGFRA	SFT2D2	1.30365e-22	3.3622	0.267	0.18	4.4753e-18
FB.01.PDGFRA	ZMYM4	2.74028e-122	3.34406	0.567	0.311	9.40711e-118
FB.01.PDGFRA	CUL4B	4.05371e-44	3.3353	0.277	0.149	1.3916e-39
FB.01.PDGFRA	NADK2	6.20938e-149	3.33461	0.292	0.085	2.13162e-144
FB.01.PDGFRA	ZNF83	2.25097e-182	3.3328	0.51	0.212	7.72734e-178
FB.01.PDGFRA	MAX	3.08699e-33	3.31609	0.36	0.237	1.05973e-28
FB.01.PDGFRA	RREB1	5.91369e-88	3.29704	0.392	0.195	2.03011e-83
FB.01.PDGFRA	IFT88	2.05652e-111	3.2831	0.315	0.119	7.05982e-107
FB.01.PDGFRA	KDM4B	8.23854e-153	3.26288	0.406	0.156	2.82821e-148
FB.01.PDGFRA	CUL5	1.9486e-67	3.22504	0.43	0.245	6.68936e-63
FB.01.PDGFRA	KIDINS220	5.57292e-64	3.21627	0.468	0.286	1.91313e-59
FB.01.PDGFRA	CTTNBP2NL	1.32721e-25	3.21577	0.292	0.19	4.55618e-21
FB.01.PDGFRA	HNRNPH1	3.05027e-31	3.20422	0.565	0.432	1.04713e-26
FB.01.PDGFRA	ARHGAP32	5.38136e-110	3.20352	0.483	0.25	1.84737e-105
FB.01.PDGFRA	TMEM39A	6.07819e-147	3.18901	0.374	0.136	2.08658e-142
FB.01.PDGFRA	DNM1	9.70461e-265	3.18826	0.305	0.05	3.3315e-260
FB.01.PDGFRA	CPEB2	7.17338e-240	3.18426	0.46	0.148	2.46255e-235
FB.01.PDGFRA	WDR27	5.63494e-308	3.17517	0.462	0.115	1.93442e-303
FB.01.PDGFRA	SORT1	0.941396	3.17457	0.412	0.419	1
FB.01.PDGFRA	ASAP2	1.41892e-51	3.16161	0.453	0.292	4.871e-47
FB.01.PDGFRA	DOCK10	3.42725e-81	3.1558	0.526	0.311	1.17654e-76
FB.01.PDGFRA	GPBP1	3.9444e-36	3.15326	0.511	0.373	1.35407e-31
FB.01.PDGFRA	GCC2	1.31101e-46	3.15192	0.424	0.274	4.50058e-42
FB.01.PDGFRA	PDE4D	1.57251e-05	3.15061	0.437	0.378	0.539827
FB.01.PDGFRA	PPIP5K2	6.93786e-184	3.14975	0.5	0.203	2.3817e-179
FB.01.PDGFRA	SESTD1	1.58618e-91	3.14956	0.409	0.215	5.44521e-87
FB.01.PDGFRA	NCOA2	7.96475e-77	3.14138	0.48	0.286	2.73422e-72
FB.01.PDGFRA	FZD6	1.72523e-164	3.13913	0.292	0.079	5.92256e-160
FB.01.PDGFRA	GOLGB1	4.36614e-121	3.12291	0.585	0.337	1.49885e-116
FB.01.PDGFRA	PHC3	4.9084e-107	3.11047	0.497	0.263	1.68501e-102
FB.01.PDGFRA	MIER1	1.75345e-25	3.10972	0.438	0.326	6.01942e-21
FB.01.PDGFRA	VTI1A	2.07534e-184	3.10064	0.596	0.281	7.12444e-180
FB.01.PDGFRA	TNFRSF1A	5.67059e-18	3.09629	0.248	0.331	1.94666e-13
FB.01.PDGFRA	NR2C1	7.46289e-144	3.09059	0.367	0.136	2.56194e-139
FB.01.PDGFRA	USP3	2.28864e-71	3.07291	0.399	0.217	7.85668e-67
FB.01.PDGFRA	DMXL1	1.07556e-118	3.06538	0.475	0.232	3.6923e-114
FB.01.PDGFRA	VRK2	7.28449e-45	3.04722	0.275	0.148	2.50069e-40
FB.01.PDGFRA	PRORP	3.12539e-117	3.00975	0.341	0.131	1.07291e-112
FB.01.PDGFRA	WRN	7.1896e-111	3.00295	0.38	0.165	2.46812e-106
FB.01.PDGFRA	HDAC7	2.68398e-81	3.00271	0.361	0.176	9.21384e-77
FB.01.PDGFRA	TTC14	8.19461e-151	2.97506	0.497	0.224	2.81313e-146
FB.01.PDGFRA	IKBKB	2.29748e-59	2.9731	0.254	0.116	7.88702e-55
FB.01.PDGFRA	UBE2K	1.10577e-48	2.9657	0.497	0.343	3.79601e-44
FB.01.PDGFRA	TUSC3	1.0863e-10	2.96308	0.373	0.304	3.72914e-06
FB.01.PDGFRA	KCTD9	1.6545e-106	2.9442	0.33	0.133	5.67972e-102
FB.01.PDGFRA	LPIN2	3.44375e-79	2.93406	0.355	0.174	1.1822e-74
FB.01.PDGFRA	ATE1	3.53924e-85	2.92344	0.427	0.225	1.21499e-80
FB.01.PDGFRA	C2CD5	2.48441e-130	2.88549	0.409	0.171	8.52873e-126
FB.01.PDGFRA	ZZEF1	3.55307e-142	2.87939	0.454	0.2	1.21973e-137
FB.01.PDGFRA	EPS15L1	1.00319e-57	2.85958	0.298	0.151	3.44387e-53
FB.01.PDGFRA	CSNK1G3	8.42445e-100	2.85121	0.404	0.193	2.89203e-95
FB.01.PDGFRA	N4BP1	9.94103e-50	2.85055	0.281	0.148	3.41266e-45
FB.01.PDGFRA	TNRC6B	8.89429e-79	2.84734	0.582	0.395	3.05332e-74
FB.01.PDGFRA	GTF3C1	2.05275e-46	2.84412	0.313	0.174	7.04688e-42
FB.01.PDGFRA	LBH	3.09027e-74	2.83259	0.109	0.293	1.06086e-69
FB.01.PDGFRA	DNM3OS	5.69591e-101	2.82605	0.27	0.098	1.95535e-96
FB.01.PDGFRA	MIR29B2CHG	1.7865e-52	2.8218	0.324	0.176	6.13287e-48
FB.01.PDGFRA	BACE2	2.18425e-100	2.82016	0.419	0.213	7.4983e-96
FB.01.PDGFRA	VPS53	2.39586e-105	2.81047	0.386	0.174	8.22473e-101
FB.01.PDGFRA	PAPSS2	1.15511e-42	2.80821	0.465	0.328	3.96536e-38
FB.01.PDGFRA	ANKRD28	8.7994e-79	2.79581	0.447	0.254	3.02075e-74
FB.01.PDGFRA	LONP2	3.61377e-67	2.79185	0.43	0.257	1.24057e-62
FB.01.PDGFRA	RAB27A	9.68711e-95	2.78556	0.275	0.106	3.32549e-90
FB.01.PDGFRA	PPFIA1	1.74062e-52	2.76883	0.355	0.21	5.97538e-48
FB.01.PDGFRA	ANKHD1	6.42916e-82	2.76522	0.489	0.278	2.20706e-77
FB.01.PDGFRA	MTERF1	4.97978e-128	2.75604	0.318	0.112	1.70951e-123
FB.01.PDGFRA	SCAF11	2.50296e-61	2.74813	0.533	0.361	8.5924e-57
FB.01.PDGFRA	NID2	9.63222e-48	2.74747	0.336	0.192	3.30664e-43
FB.01.PDGFRA	SUGP2	1.58392e-124	2.73401	0.426	0.189	5.43745e-120
FB.01.PDGFRA	VGLL4	4.26828e-65	2.72382	0.444	0.28	1.46526e-60
FB.01.PDGFRA	PDSS2	1.57329e-81	2.70103	0.351	0.171	5.40096e-77
FB.01.PDGFRA	KMT2A	4.475e-64	2.69923	0.488	0.308	1.53622e-59
FB.01.PDGFRA	TCF4	1.43177e-115	2.67774	0.749	0.575	4.91511e-111
FB.01.PDGFRA	ACVR1	2.93248e-79	2.6539	0.37	0.188	1.00669e-74
FB.01.PDGFRA	SLC35D1	6.5004e-94	2.65143	0.251	0.089	2.23152e-89
FB.01.PDGFRA	CEP162	9.13149e-77	2.64689	0.295	0.132	3.13475e-72
FB.01.PDGFRA	NRP2	3.26678e-27	2.64681	0.398	0.274	1.12145e-22
FB.01.PDGFRA	OGT	1.38292e-176	2.62003	0.556	0.252	4.74743e-172
FB.01.PDGFRA	PRRC1	4.69481e-67	2.61335	0.304	0.147	1.61168e-62
FB.01.PDGFRA	KAT6A	2.86244e-51	2.61327	0.432	0.265	9.82646e-47
FB.01.PDGFRA	LATS2	3.2915e-95	2.60566	0.348	0.155	1.12994e-90
FB.01.PDGFRA	ZNF254	3.19441e-77	2.59699	0.331	0.156	1.09661e-72
FB.01.PDGFRA	CPEB3	1.06532e-161	2.58881	0.399	0.145	3.65712e-157
FB.01.PDGFRA	FOXN3	1.05204e-136	2.58573	0.561	0.305	3.61154e-132
FB.01.PDGFRA	TMEM87B	5.01576e-85	2.57589	0.388	0.198	1.72186e-80
FB.01.PDGFRA	ACAD11	1.4348e-157	2.56122	0.395	0.144	4.92552e-153
FB.01.PDGFRA	CBFB	1.52363e-113	2.55696	0.389	0.171	5.23046e-109
FB.01.PDGFRA	ARHGAP5	2.7177e-40	2.55194	0.384	0.247	9.3296e-36
FB.01.PDGFRA	SFXN1	1.75819e-59	2.54109	0.282	0.137	6.0357e-55
FB.01.PDGFRA	CECR2	4.59137e-63	2.50413	0.263	0.12	1.57617e-58
FB.01.PDGFRA	RAD23B	1.10039e-08	2.50179	0.335	0.279	0.000377753
FB.01.PDGFRA	CHM	3.06975e-30	2.48108	0.377	0.257	1.05381e-25
FB.01.PDGFRA	SHPRH	2.58676e-103	2.47693	0.445	0.221	8.88008e-99
FB.01.PDGFRA	NIN	1.98894e-34	2.47002	0.379	0.247	6.82784e-30
FB.01.PDGFRA	ASB3	3.61818e-90	2.46793	0.39	0.19	1.24209e-85
FB.01.PDGFRA	PPP4R1	5.24716e-81	2.452	0.404	0.208	1.8013e-76
FB.01.PDGFRA	CLEC16A	5.1124e-106	2.43178	0.357	0.152	1.75504e-101
FB.01.PDGFRA	SFSWAP	7.89568e-90	2.42726	0.424	0.214	2.71051e-85
FB.01.PDGFRA	ANKIB1	3.71438e-86	2.40135	0.472	0.273	1.27511e-81
FB.01.PDGFRA	ATF7	2.28737e-74	2.38642	0.431	0.236	7.85232e-70
FB.01.PDGFRA	ABHD2	1.70814e-20	2.36382	0.343	0.254	5.86388e-16
FB.01.PDGFRA	MDM4	1.21538e-45	2.35392	0.424	0.271	4.17229e-41
FB.01.PDGFRA	FBXL4	5.83484e-105	2.33564	0.338	0.139	2.00304e-100
FB.01.PDGFRA	SEPTIN9	0.455636	2.33138	0.253	0.251	1
FB.01.PDGFRA	DDX10	4.05913e-103	2.3113	0.383	0.175	1.39346e-98
FB.01.PDGFRA	CFAP44	6.16991e-148	2.30758	0.289	0.083	2.11807e-143
FB.01.PDGFRA	TFB1M	4.84596e-56	2.29684	0.254	0.12	1.66357e-51
FB.01.PDGFRA	ZNF160	3.86747e-62	2.29603	0.303	0.145	1.32766e-57
FB.01.PDGFRA	ANKRD26	3.542e-100	2.28929	0.355	0.153	1.21593e-95
FB.01.PDGFRA	FRA10AC1	1.83174e-86	2.27632	0.317	0.139	6.28817e-82
FB.01.PDGFRA	UBAP2	4.96354e-17	2.27494	0.271	0.189	1.70393e-12
FB.01.PDGFRA	GOPC	9.25763e-48	2.26123	0.385	0.235	3.17805e-43
FB.01.PDGFRA	FUBP1	4.25753e-62	2.25939	0.435	0.256	1.46157e-57
FB.01.PDGFRA	STX16	1.88582e-167	2.25242	0.517	0.229	6.47381e-163
FB.01.PDGFRA	MFN1	1.36586e-60	2.24803	0.306	0.154	4.68884e-56
FB.01.PDGFRA	ZNF407	1.26048e-127	2.24758	0.468	0.215	4.3271e-123
FB.01.PDGFRA	PPP3R1	7.96627e-30	2.23931	0.323	0.209	2.73474e-25
FB.01.PDGFRA	CUL3	4.38061e-68	2.23249	0.451	0.264	1.50382e-63
FB.01.PDGFRA	CSNK1D	3.01672e-37	2.21316	0.328	0.2	1.03561e-32
FB.01.PDGFRA	TTC17	7.00614e-119	2.20173	0.589	0.338	2.40514e-114
FB.01.PDGFRA	ATXN2	2.82115e-114	2.20018	0.559	0.314	9.68472e-110
FB.01.PDGFRA	GPATCH8	5.91402e-148	2.18716	0.58	0.309	2.03022e-143
FB.01.PDGFRA	MIRLET7BHG	7.85155e-141	2.18424	0.432	0.18	2.69536e-136
FB.01.PDGFRA	TNKS2	1.71417e-95	2.18421	0.438	0.225	5.88457e-91
FB.01.PDGFRA	SHLD2	5.34239e-73	2.18069	0.37	0.19	1.83399e-68
FB.01.PDGFRA	LCOR	4.46612e-147	2.16873	0.525	0.247	1.53317e-142
FB.01.PDGFRA	HOOK3	2.65603e-80	2.16614	0.546	0.336	9.11788e-76
FB.01.PDGFRA	ENTPD4	7.30401e-145	2.15869	0.412	0.166	2.50739e-140
FB.01.PDGFRA	GIT2	5.09991e-101	2.15337	0.373	0.169	1.75075e-96
FB.01.PDGFRA	SF1	1.87398e-31	2.14228	0.52	0.392	6.43317e-27
FB.01.PDGFRA	USP22	3.22482e-12	2.14157	0.398	0.323	1.10705e-07
FB.01.PDGFRA	UBA6	7.34611e-50	2.13825	0.319	0.181	2.52185e-45
FB.01.PDGFRA	TMEM165	5.70065e-22	2.13339	0.605	0.508	1.95698e-17
FB.01.PDGFRA	CCDC57	6.90994e-161	2.12522	0.341	0.107	2.37211e-156
FB.01.PDGFRA	SLC35B3	9.46835e-39	2.09953	0.265	0.148	3.25039e-34
FB.01.PDGFRA	UNC5B	8.07417e-18	2.09839	0.284	0.203	2.77178e-13
FB.01.PDGFRA	PPP1CC	5.62117e-08	2.08029	0.234	0.284	0.00192969
FB.01.PDGFRA	CHIC1	3.22559e-102	2.07441	0.287	0.106	1.10731e-97
FB.01.PDGFRA	IP6K2	8.37161e-18	2.07371	0.334	0.243	2.87389e-13
FB.01.PDGFRA	SNTB2	1.17441e-53	2.07089	0.269	0.134	4.03163e-49
FB.01.PDGFRA	SRGAP2C	1.03573e-73	2.06851	0.278	0.122	3.55557e-69
FB.01.PDGFRA	HERC4	5.10065e-180	2.06775	0.626	0.316	1.751e-175
FB.01.PDGFRA	EVC	3.16699e-188	2.05386	0.332	0.089	1.0872e-183
FB.01.PDGFRA	CREBBP	4.35258e-79	2.04217	0.49	0.288	1.4942e-74
FB.01.PDGFRA	MCM9	4.38761e-69	2.03533	0.255	0.111	1.50622e-64
FB.01.PDGFRA	PRKAR2A	2.77309e-21	2.03432	0.295	0.205	9.51974e-17
FB.01.PDGFRA	LATS1	1.64586e-68	2.03362	0.317	0.152	5.65007e-64
FB.01.PDGFRA	PIKFYVE	4.53072e-116	2.0032	0.427	0.195	1.55535e-111
FB.01.PDGFRA	L3HYPDH	4.17158e-87	1.9937	0.273	0.108	1.43206e-82
FB.01.PDGFRA	SULF2	1.11533e-237	1.99337	0.405	0.112	3.8288e-233
FB.01.PDGFRA	STAM2	8.69166e-76	1.9894	0.307	0.142	2.98376e-71
FB.01.PDGFRA	ZNF326	5.65832e-28	1.96879	0.273	0.172	1.94245e-23
FB.01.PDGFRA	DIP2A	5.11369e-43	1.96715	0.255	0.137	1.75548e-38
FB.01.PDGFRA	HELZ	7.7403e-115	1.96408	0.494	0.256	2.65717e-110
FB.01.PDGFRA	TASOR2	1.34383e-100	1.96338	0.485	0.256	4.61324e-96
FB.01.PDGFRA	FBXL20	4.84179e-82	1.95942	0.385	0.189	1.66214e-77
FB.01.PDGFRA	INTU	1.62773e-166	1.95883	0.282	0.071	5.58784e-162
FB.01.PDGFRA	SLC30A7	3.2245e-102	1.9542	0.412	0.202	1.10694e-97
FB.01.PDGFRA	PPP6R2	9.05348e-90	1.93675	0.371	0.175	3.10797e-85
FB.01.PDGFRA	SECISBP2	8.35042e-62	1.93528	0.402	0.232	2.86661e-57
FB.01.PDGFRA	UBE3A	1.06698e-56	1.93285	0.486	0.313	3.66283e-52
FB.01.PDGFRA	AKAP10	2.69152e-75	1.93275	0.335	0.16	9.23972e-71
FB.01.PDGFRA	CABIN1	3.79575e-111	1.92076	0.418	0.194	1.30304e-106
FB.01.PDGFRA	UBE3C	4.36185e-104	1.91786	0.482	0.254	1.49738e-99
FB.01.PDGFRA	METTL25	9.36509e-85	1.91452	0.251	0.095	3.21494e-80
FB.01.PDGFRA	NBPF15	3.59635e-123	1.89607	0.359	0.14	1.23459e-118
FB.01.PDGFRA	CDRT4	1.11777e-171	1.89105	0.259	0.057	3.83719e-167
FB.01.PDGFRA	UGCG	5.83454e-07	1.88606	0.354	0.303	0.0200294
FB.01.PDGFRA	ZNHIT6	7.61503e-101	1.86179	0.299	0.116	2.61416e-96
FB.01.PDGFRA	AHCTF1	7.84044e-43	1.85855	0.32	0.19	2.69155e-38
FB.01.PDGFRA	SLC25A32	2.78931e-79	1.85454	0.263	0.108	9.57541e-75
FB.01.PDGFRA	COG3	2.96814e-166	1.84735	0.393	0.137	1.01893e-161
FB.01.PDGFRA	ANKFY1	4.51571e-90	1.84159	0.351	0.162	1.5502e-85
FB.01.PDGFRA	MTMR2	5.17615e-97	1.83003	0.447	0.232	1.77692e-92
FB.01.PDGFRA	CALCOCO1	3.14946e-91	1.82963	0.314	0.134	1.08118e-86
FB.01.PDGFRA	GOLPH3	1.43686e-05	1.82945	0.311	0.275	0.493261
FB.01.PDGFRA	EIF2AK2	0.00671448	1.81675	0.302	0.277	1
FB.01.PDGFRA	SESN3	3.4234e-21	1.80383	0.37	0.275	1.17522e-16
FB.01.PDGFRA	CCNL2	2.56592e-227	1.78999	0.62	0.276	8.80855e-223
FB.01.PDGFRA	FOSL2	9.26389e-34	1.77937	0.259	0.154	3.1802e-29
FB.01.PDGFRA	SMARCAD1	2.66551e-86	1.77381	0.386	0.19	9.15043e-82
FB.01.PDGFRA	ABCC5	4.00924e-83	1.75916	0.301	0.129	1.37633e-78
FB.01.PDGFRA	RERE	1.33116e-219	1.75175	0.728	0.405	4.56973e-215
FB.01.PDGFRA	EPN2	1.30754e-07	1.74791	0.269	0.214	0.00448864
FB.01.PDGFRA	PI4KA	9.06168e-35	1.74751	0.305	0.189	3.11079e-30
FB.01.PDGFRA	NISCH	7.16465e-68	1.74671	0.285	0.13	2.45955e-63
FB.01.PDGFRA	PHYKPL	6.17057e-97	1.74341	0.359	0.16	2.11829e-92
FB.01.PDGFRA	SUPT20H	5.09366e-112	1.74306	0.404	0.18	1.7486e-107
FB.01.PDGFRA	PDXDC1	3.45081e-119	1.73017	0.448	0.217	1.18463e-114
FB.01.PDGFRA	RBMX	0.870582	1.72863	0.345	0.338	1
FB.01.PDGFRA	RNF121	3.1767e-88	1.72732	0.272	0.107	1.09053e-83
FB.01.PDGFRA	SLC7A6	1.85233e-152	1.71821	0.313	0.095	6.35886e-148
FB.01.PDGFRA	GLCE	6.79999e-110	1.71409	0.25	0.081	2.33437e-105
FB.01.PDGFRA	LUC7L	8.85883e-136	1.71388	0.532	0.267	3.04115e-131
FB.01.PDGFRA	NFKBIZ	1.271e-220	1.71287	0.504	0.197	4.36323e-216
FB.01.PDGFRA	PML	3.36176e-27	1.71227	0.325	0.213	1.15406e-22
FB.01.PDGFRA	TBC1D5	6.40471e-110	1.7094	0.57	0.338	2.19867e-105
FB.01.PDGFRA	UQCR10	1.57324e-197	1.70929	0.038	0.355	5.40077e-193
FB.01.PDGFRA	RALGAPA1	4.09042e-89	1.70707	0.542	0.319	1.4042e-84
FB.01.PDGFRA	PKN2	8.87395e-68	1.70595	0.501	0.311	3.04634e-63
FB.01.PDGFRA	AFF1	8.99612e-202	1.70559	0.678	0.358	3.08828e-197
FB.01.PDGFRA	TM9SF3	3.59938e-20	1.70525	0.466	0.364	1.23563e-15
FB.01.PDGFRA	USP9X	3.40295e-34	1.70411	0.481	0.35	1.1682e-29
FB.01.PDGFRA	RSRP1	4.81688e-74	1.67124	0.531	0.331	1.65359e-69
FB.01.PDGFRA	CREBRF	5.43444e-21	1.66901	0.281	0.187	1.86559e-16
FB.01.PDGFRA	TCF7L2	1.10528e-51	1.65383	0.436	0.276	3.79432e-47
FB.01.PDGFRA	SAMD4B	7.48375e-49	1.65235	0.336	0.194	2.5691e-44
FB.01.PDGFRA	CSAD	3.22601e-177	1.65087	0.401	0.138	1.10746e-172
FB.01.PDGFRA	SREK1	1.18126e-76	1.64482	0.5	0.297	4.05515e-72
FB.01.PDGFRA	MAP2K4	1.26549e-117	1.63333	0.433	0.2	4.34431e-113
FB.01.PDGFRA	FRS2	7.26207e-94	1.62933	0.402	0.196	2.493e-89
FB.01.PDGFRA	PCF11	4.38374e-28	1.62777	0.291	0.184	1.50489e-23
FB.01.PDGFRA	AGO4	1.23196e-81	1.62211	0.324	0.147	4.22918e-77
FB.01.PDGFRA	ACACA	7.59603e-81	1.60765	0.333	0.16	2.60764e-76
FB.01.PDGFRA	TOP2B	1.15334e-58	1.58744	0.365	0.204	3.95928e-54
FB.01.PDGFRA	ZDHHC17	2.30348e-76	1.58672	0.394	0.203	7.90763e-72
FB.01.PDGFRA	WWP1	1.47432e-55	1.57916	0.302	0.16	5.06118e-51
FB.01.PDGFRA	CELF1	1.93044e-80	1.57302	0.519	0.317	6.62701e-76
FB.01.PDGFRA	RBM26	2.98625e-85	1.57231	0.471	0.264	1.02515e-80
FB.01.PDGFRA	DENND6A	4.53419e-73	1.57099	0.382	0.2	1.55654e-68
FB.01.PDGFRA	RNF111	6.11199e-91	1.57063	0.424	0.212	2.09818e-86
FB.01.PDGFRA	ZC3H14	5.46644e-76	1.5706	0.357	0.176	1.87658e-71
FB.01.PDGFRA	CERT1	4.74111e-77	1.56384	0.396	0.208	1.62758e-72
FB.01.PDGFRA	SMAP1	0.141943	1.56003	0.255	0.248	1
FB.01.PDGFRA	ANKRD13C	6.28738e-89	1.55686	0.368	0.175	2.1584e-84
FB.01.PDGFRA	SP110	1.98782e-20	1.55246	0.283	0.192	6.82397e-16
FB.01.PDGFRA	TAF15	3.12628e-66	1.54658	0.459	0.271	1.07322e-61
FB.01.PDGFRA	SPATA13	2.86275e-149	1.54474	0.359	0.129	9.82752e-145
FB.01.PDGFRA	PKD1	7.63152e-99	1.54394	0.35	0.152	2.61983e-94
FB.01.PDGFRA	ELP3	9.91838e-75	1.54051	0.276	0.118	3.40488e-70
FB.01.PDGFRA	TMEM50B	3.22494e-19	1.53595	0.312	0.223	1.10709e-14
FB.01.PDGFRA	TUT7	0	1.53248	0.576	0.199	0
FB.01.PDGFRA	ARFGAP1	1.4078e-85	1.51806	0.266	0.105	4.83282e-81
FB.01.PDGFRA	UBE2R2	0.00168504	1.51799	0.302	0.274	1
FB.01.PDGFRA	ARMH3	1.37251e-81	1.50563	0.339	0.158	4.71167e-77
FB.01.PDGFRA	RPAP2	4.96675e-95	1.50524	0.405	0.2	1.70504e-90
FB.01.PDGFRA	PRKD3	6.03898e-74	1.50202	0.361	0.186	2.07312e-69
FB.01.PDGFRA	IQCB1	1.12532e-65	1.49655	0.262	0.116	3.86312e-61
FB.01.PDGFRA	SLC25A46	2.1429e-63	1.48804	0.319	0.162	7.35635e-59
FB.01.PDGFRA	CTDSP2	2.23245e-27	1.48202	0.322	0.213	7.66379e-23
FB.01.PDGFRA	MGA	8.30754e-107	1.48105	0.396	0.18	2.8519e-102
FB.01.PDGFRA	NBPF1	3.40475e-103	1.47736	0.266	0.092	1.16882e-98
FB.01.PDGFRA	TRRAP	1.35129e-70	1.47384	0.393	0.21	4.63883e-66
FB.01.PDGFRA	EXOC6B	3.17514e-163	1.47144	0.6	0.308	1.08999e-158
FB.01.PDGFRA	UBA5	6.34161e-72	1.46653	0.274	0.12	2.17701e-67
FB.01.PDGFRA	FGFR1OP2	9.50186e-32	1.45883	0.325	0.211	3.26189e-27
FB.01.PDGFRA	SLF2	9.30617e-114	1.45847	0.384	0.166	3.19471e-109
FB.01.PDGFRA	NR2F1	3.24439e-43	1.44967	0.412	0.268	1.11377e-38
FB.01.PDGFRA	NPLOC4	1.48099e-28	1.44028	0.273	0.171	5.0841e-24
FB.01.PDGFRA	CDK12	1.58031e-62	1.43184	0.379	0.209	5.42506e-58
FB.01.PDGFRA	HEATR5B	3.44706e-72	1.43043	0.303	0.139	1.18334e-67
FB.01.PDGFRA	NR2F2-AS1	4.21363e-52	1.42965	0.26	0.124	1.4465e-47
FB.01.PDGFRA	RNPC3	6.60798e-98	1.42406	0.377	0.169	2.26845e-93
FB.01.PDGFRA	ASXL2	4.48175e-16	1.42282	0.251	0.178	1.53854e-11
FB.01.PDGFRA	TAOK1	7.5296e-60	1.4172	0.507	0.331	2.58484e-55
FB.01.PDGFRA	ZNF75D	1.79622e-68	1.41116	0.266	0.116	6.16626e-64
FB.01.PDGFRA	SENP7	8.5015e-72	1.40939	0.423	0.234	2.91848e-67
FB.01.PDGFRA	NUBPL	6.07716e-50	1.40621	0.309	0.166	2.08623e-45
FB.01.PDGFRA	MAPK1	1.33745e-16	1.39484	0.342	0.264	4.59132e-12
FB.01.PDGFRA	TAOK3	5.01558e-22	1.39346	0.399	0.302	1.7218e-17
FB.01.PDGFRA	PTPRS	3.21901e-32	1.391	0.298	0.182	1.10506e-27
FB.01.PDGFRA	PARN	2.69404e-78	1.38253	0.363	0.182	9.24836e-74
FB.01.PDGFRA	ENOSF1	1.48029e-75	1.38182	0.298	0.138	5.08168e-71
FB.01.PDGFRA	TBRG1	4.50102e-39	1.36805	0.307	0.182	1.54515e-34
FB.01.PDGFRA	TUG1	2.94842e-18	1.36659	0.307	0.224	1.01216e-13
FB.01.PDGFRA	PRPF39	2.26466e-81	1.36611	0.306	0.134	7.77435e-77
FB.01.PDGFRA	RARS2	1.59105e-157	1.36393	0.47	0.204	5.46191e-153
FB.01.PDGFRA	CYFIP1	1.39183e-08	1.36349	0.344	0.275	0.000477801
FB.01.PDGFRA	DPY19L3	4.88234e-117	1.35775	0.336	0.13	1.67606e-112
FB.01.PDGFRA	SIN3B	1.66651e-98	1.3538	0.314	0.127	5.72097e-94
FB.01.PDGFRA	TTLL3	3.92069e-139	1.35256	0.32	0.106	1.34593e-134
FB.01.PDGFRA	PMS1	3.05553e-93	1.34986	0.325	0.14	1.04893e-88
FB.01.PDGFRA	ZNF236	7.9611e-86	1.33945	0.295	0.124	2.73297e-81
FB.01.PDGFRA	SLC35A3	1.25703e-37	1.31572	0.25	0.135	4.31525e-33
FB.01.PDGFRA	UBE4B	7.8928e-89	1.31384	0.382	0.185	2.70952e-84
FB.01.PDGFRA	ORMDL1	5.2691e-18	1.31188	0.354	0.263	1.80883e-13
FB.01.PDGFRA	TRIM38	1.67171e-39	1.30605	0.308	0.183	5.73881e-35
FB.01.PDGFRA	TLN2	9.4148e-252	1.29786	0.371	0.089	3.23201e-247
FB.01.PDGFRA	MTG1	1.86624e-79	1.29459	0.331	0.154	6.40662e-75
FB.01.PDGFRA	LUZP1	3.77222e-60	1.2941	0.36	0.201	1.29497e-55
FB.01.PDGFRA	TNRC18	1.19745e-73	1.28824	0.386	0.202	4.11072e-69
FB.01.PDGFRA	SUN1	1.13411e-13	1.28743	0.269	0.199	3.8933e-09
FB.01.PDGFRA	CCDC144A	1.04278e-64	1.2664	0.287	0.137	3.57977e-60
FB.01.PDGFRA	NIPAL2	3.16047e-101	1.26393	0.322	0.13	1.08496e-96
FB.01.PDGFRA	LNPK	2.40463e-14	1.25868	0.252	0.181	8.25487e-10
FB.01.PDGFRA	NUDT4	0.822643	1.2569	0.268	0.267	1
FB.01.PDGFRA	FAM120A	4.82962e-36	1.25533	0.411	0.272	1.65796e-31
FB.01.PDGFRA	WASL	0.0126113	1.25324	0.314	0.29	1
FB.01.PDGFRA	KDM1A	2.20169e-88	1.25084	0.313	0.136	7.55817e-84
FB.01.PDGFRA	GAPVD1	7.11128e-51	1.24579	0.369	0.214	2.44123e-46
FB.01.PDGFRA	RAD50	1.73486e-88	1.24232	0.401	0.204	5.95561e-84
FB.01.PDGFRA	POGZ	8.31588e-53	1.23223	0.409	0.252	2.85476e-48
FB.01.PDGFRA	URI1	8.66838e-67	1.22597	0.384	0.212	2.97577e-62
FB.01.PDGFRA	TIA1	2.38203e-74	1.22118	0.392	0.206	8.17726e-70
FB.01.PDGFRA	RPGRIP1L	2.98711e-136	1.214	0.271	0.079	1.02545e-131
FB.01.PDGFRA	DEK	2.17886e-39	1.21026	0.195	0.33	7.47981e-35
FB.01.PDGFRA	SP140L	2.20329e-59	1.19787	0.303	0.154	7.56367e-55
FB.01.PDGFRA	ELP1	7.86439e-65	1.19177	0.255	0.113	2.69977e-60
FB.01.PDGFRA	INO80	1.80065e-82	1.18572	0.369	0.182	6.18145e-78
FB.01.PDGFRA	AKAP11	6.96237e-108	1.1846	0.397	0.184	2.39011e-103
FB.01.PDGFRA	MAP2K5	2.0181e-136	1.17883	0.444	0.194	6.92794e-132
FB.01.PDGFRA	MLH3	1.43582e-47	1.17632	0.278	0.148	4.92904e-43
FB.01.PDGFRA	SIMC1	2.2007e-120	1.17106	0.269	0.085	7.55477e-116
FB.01.PDGFRA	NOL10	1.36318e-34	1.16822	0.263	0.154	4.67967e-30
FB.01.PDGFRA	WDR19	3.99893e-130	1.16774	0.286	0.09	1.37279e-125
FB.01.PDGFRA	SRSF11	1.1393e-154	1.16203	0.78	0.547	3.9111e-150
FB.01.PDGFRA	BCAT1	3.22031e-72	1.15675	0.314	0.15	1.1055e-67
FB.01.PDGFRA	PACRGL	2.19335e-87	1.14996	0.257	0.097	7.52956e-83
FB.01.PDGFRA	DAAM1	1.09723e-89	1.14622	0.402	0.203	3.76667e-85
FB.01.PDGFRA	TRIM56	3.34894e-44	1.14609	0.284	0.153	1.14966e-39
FB.01.PDGFRA	ZMYM6	8.89868e-102	1.14432	0.283	0.104	3.05483e-97
FB.01.PDGFRA	DCP2	4.98658e-40	1.13856	0.282	0.161	1.71184e-35
FB.01.PDGFRA	SYNCRIP	0.000964152	1.12717	0.297	0.264	1
FB.01.PDGFRA	ERCC5	1.66665e-86	1.12192	0.278	0.111	5.72143e-82
FB.01.PDGFRA	IREB2	1.13699e-44	1.11068	0.335	0.195	3.90317e-40
FB.01.PDGFRA	MSC-AS1	2.09882e-142	1.10927	0.327	0.107	7.20502e-138
FB.01.PDGFRA	ATP11B	7.7921e-37	1.10892	0.335	0.211	2.67495e-32
FB.01.PDGFRA	TLK2	1.27711e-80	1.10666	0.406	0.215	4.38419e-76
FB.01.PDGFRA	RNF216	1.48253e-154	1.10441	0.509	0.234	5.08938e-150
FB.01.PDGFRA	CCDC66	1.00504e-57	1.10401	0.325	0.173	3.4502e-53
FB.01.PDGFRA	REV1	1.70311e-80	1.09906	0.334	0.157	5.8466e-76
FB.01.PDGFRA	MSANTD2	2.57657e-64	1.09678	0.278	0.127	8.84511e-60
FB.01.PDGFRA	UBP1	4.67805e-37	1.0954	0.269	0.153	1.60593e-32
FB.01.PDGFRA	CBR4	5.68044e-61	1.09093	0.355	0.192	1.95004e-56
FB.01.PDGFRA	TASOR	5.81556e-53	1.08727	0.369	0.213	1.99642e-48
FB.01.PDGFRA	PURA	3.59132e-29	1.08621	0.301	0.192	1.23286e-24
FB.01.PDGFRA	SP3	2.39454e-06	1.08278	0.3	0.253	0.0822021
FB.01.PDGFRA	MAPK8IP3	1.18596e-113	1.08261	0.337	0.13	4.07129e-109
FB.01.PDGFRA	ATF2	3.84841e-50	1.07347	0.398	0.239	1.32112e-45
FB.01.PDGFRA	KIAA2026	5.82574e-35	1.07243	0.365	0.237	1.99992e-30
FB.01.PDGFRA	SAFB	1.27303e-35	1.07058	0.317	0.194	4.37018e-31
FB.01.PDGFRA	HERPUD2	5.49616e-33	1.07038	0.301	0.185	1.88678e-28
FB.01.PDGFRA	SPEN	2.34827e-05	1.07003	0.297	0.257	0.806137
FB.01.PDGFRA	SUMF1	8.24866e-51	1.06808	0.367	0.221	2.83168e-46
FB.01.PDGFRA	DIDO1	7.54757e-69	1.06522	0.36	0.186	2.591e-64
FB.01.PDGFRA	INTS3	5.00027e-51	1.06498	0.251	0.123	1.71654e-46
FB.01.PDGFRA	KRIT1	2.94763e-66	1.0631	0.406	0.224	1.01189e-61
FB.01.PDGFRA	INO80D	3.80082e-39	1.04963	0.317	0.188	1.30478e-34
FB.01.PDGFRA	PHTF1	6.91906e-45	1.04961	0.256	0.133	2.37524e-40
FB.01.PDGFRA	CDC16	5.96769e-57	1.04094	0.297	0.151	2.04865e-52
FB.01.PDGFRA	LMF1	6.35124e-76	1.03441	0.267	0.113	2.18032e-71
FB.01.PDGFRA	PARP6	6.19973e-95	1.03186	0.32	0.133	2.12831e-90
FB.01.PDGFRA	TOGARAM1	5.51503e-66	1.02917	0.308	0.15	1.89326e-61
FB.01.PDGFRA	PLCL1	7.20784e-09	1.01571	0.273	0.332	0.000247438
FB.01.PDGFRA	SLC30A9	9.21732e-62	1.00712	0.393	0.224	3.16421e-57
FB.01.PDGFRA	AMBRA1	1.83015e-97	0.998008	0.412	0.2	6.28273e-93
FB.01.PDGFRA	BTBD10	3.85107e-61	0.994184	0.278	0.133	1.32203e-56
FB.01.PDGFRA	SNX19	6.02146e-64	0.985122	0.327	0.165	2.06711e-59
FB.01.PDGFRA	S100PBP	2.24082e-59	0.984026	0.308	0.157	7.69251e-55
FB.01.PDGFRA	BICRAL	1.38682e-104	0.983725	0.326	0.13	4.76083e-100
FB.01.PDGFRA	SEC24A	5.16801e-83	0.981177	0.313	0.138	1.77413e-78
FB.01.PDGFRA	CHFR	4.73992e-66	0.975301	0.33	0.166	1.62717e-61
FB.01.PDGFRA	UQCC1	2.70512e-62	0.974042	0.282	0.134	9.28641e-58
FB.01.PDGFRA	TRIM44	1.04563e-25	0.968258	0.442	0.328	3.58953e-21
FB.01.PDGFRA	NUP160	1.67295e-52	0.963737	0.282	0.145	5.74306e-48
FB.01.PDGFRA	MBTD1	9.52452e-54	0.955564	0.28	0.141	3.26967e-49
FB.01.PDGFRA	SMAD4	1.80901e-55	0.951211	0.381	0.219	6.21014e-51
FB.01.PDGFRA	BLCAP	2.51331e-14	0.921817	0.297	0.216	8.62793e-10
FB.01.PDGFRA	BCL2L1	3.56014e-10	0.918983	0.274	0.212	1.22216e-05
FB.01.PDGFRA	ZNF37A	4.98448e-77	0.914025	0.363	0.181	1.71112e-72
FB.01.PDGFRA	FAM13B	1.77127e-87	0.908451	0.422	0.217	6.08061e-83
FB.01.PDGFRA	IDE	1.46322e-73	0.908012	0.269	0.116	5.02308e-69
FB.01.PDGFRA	ZNF506	4.91934e-49	0.905889	0.266	0.135	1.68876e-44
FB.01.PDGFRA	GOLGA8A	7.71154e-140	0.905695	0.275	0.079	2.64729e-135
FB.01.PDGFRA	NFX1	4.94144e-68	0.901337	0.333	0.17	1.69635e-63
FB.01.PDGFRA	DDX6	1.83368e-21	0.892062	0.357	0.255	6.29483e-17
FB.01.PDGFRA	GALNT11	2.36897e-36	0.884914	0.275	0.162	8.13243e-32
FB.01.PDGFRA	QSER1	7.73003e-34	0.874249	0.271	0.162	2.65364e-29
FB.01.PDGFRA	ZNF654	4.63392e-58	0.872192	0.31	0.158	1.59078e-53
FB.01.PDGFRA	SUPT6H	1.30546e-47	0.869542	0.309	0.169	4.4815e-43
FB.01.PDGFRA	GSK3B	1.36033e-66	0.864686	0.527	0.331	4.66989e-62
FB.01.PDGFRA	TIAL1	3.58735e-49	0.864545	0.431	0.271	1.2315e-44
FB.01.PDGFRA	LSM14A	7.43458e-26	0.862363	0.444	0.327	2.55222e-21
FB.01.PDGFRA	TECPR2	8.65189e-50	0.862198	0.254	0.126	2.97011e-45
FB.01.PDGFRA	GTF2H1	1.56811e-63	0.858692	0.266	0.122	5.38317e-59
FB.01.PDGFRA	PARG	1.35249e-46	0.852565	0.251	0.127	4.64298e-42
FB.01.PDGFRA	KIZ	1.67938e-85	0.850009	0.257	0.099	5.76514e-81
FB.01.PDGFRA	PPWD1	1.14071e-87	0.845022	0.304	0.126	3.91593e-83
FB.01.PDGFRA	FBH1	2.42353e-51	0.838353	0.299	0.159	8.31972e-47
FB.01.PDGFRA	EXOC1	9.4056e-72	0.836782	0.363	0.186	3.22885e-67
FB.01.PDGFRA	CDK13	2.04034e-232	0.830947	0.641	0.287	7.00427e-228
FB.01.PDGFRA	ZNF587B	2.65463e-108	0.825447	0.25	0.08	9.11309e-104
FB.01.PDGFRA	RBM33	4.11961e-134	0.821952	0.536	0.268	1.41422e-129
FB.01.PDGFRA	FUBP3	8.5822e-39	0.819554	0.285	0.162	2.94618e-34
FB.01.PDGFRA	DCAF5	2.65717e-117	0.816876	0.429	0.198	9.1218e-113
FB.01.PDGFRA	FARP2	3.8222e-48	0.816561	0.313	0.17	1.31212e-43
FB.01.PDGFRA	UBN2	3.20393e-89	0.813225	0.365	0.169	1.09988e-84
FB.01.PDGFRA	PRMT3	2.54779e-75	0.806691	0.287	0.126	8.74631e-71
FB.01.PDGFRA	MTOR	3.40882e-47	0.806475	0.286	0.152	1.17021e-42
FB.01.PDGFRA	MTREX	3.01774e-73	0.804653	0.368	0.187	1.03596e-68
FB.01.PDGFRA	ZNF875	5.03555e-46	0.797111	0.25	0.127	1.72866e-41
FB.01.PDGFRA	SEC23IP	1.21381e-58	0.796072	0.279	0.136	4.16689e-54
FB.01.PDGFRA	RUFY1	3.19067e-33	0.794143	0.266	0.154	1.09532e-28
FB.01.PDGFRA	INTS10	2.29556e-61	0.7914	0.284	0.137	7.88043e-57
FB.01.PDGFRA	HMGXB3	1.51305e-91	0.787152	0.354	0.163	5.19413e-87
FB.01.PDGFRA	KIAA0753	4.17176e-101	0.782007	0.269	0.096	1.43212e-96
FB.01.PDGFRA	PDPR	1.38357e-97	0.778553	0.269	0.098	4.74967e-93
FB.01.PDGFRA	CEP164	1.73952e-69	0.77327	0.267	0.117	5.97159e-65
FB.01.PDGFRA	STX2	3.90698e-54	0.767499	0.271	0.134	1.34123e-49
FB.01.PDGFRA	PIGL	3.76422e-97	0.766075	0.302	0.12	1.29222e-92
FB.01.PDGFRA	TNKS1BP1	1.70627e-25	0.765511	0.307	0.198	5.85747e-21
FB.01.PDGFRA	IFT81	2.52023e-84	0.760563	0.318	0.14	8.65169e-80
FB.01.PDGFRA	TMEM245	2.34863e-37	0.758482	0.358	0.227	8.06262e-33
FB.01.PDGFRA	AGK	5.86136e-64	0.747192	0.258	0.115	2.01214e-59
FB.01.PDGFRA	SLC25A26	5.01952e-42	0.73062	0.25	0.133	1.72315e-37
FB.01.PDGFRA	KLHDC10	1.11392e-33	0.73027	0.295	0.185	3.82398e-29
FB.01.PDGFRA	ARIH2	3.99328e-34	0.726816	0.316	0.196	1.37085e-29
FB.01.PDGFRA	CCDC93	5.10966e-68	0.725808	0.28	0.128	1.7541e-63
FB.01.PDGFRA	FNTA	3.39751e-26	0.722903	0.292	0.189	1.16633e-21
FB.01.PDGFRA	KANSL3	4.95284e-65	0.722611	0.287	0.136	1.70026e-60
FB.01.PDGFRA	MDN1	3.06156e-74	0.718634	0.284	0.127	1.051e-69
FB.01.PDGFRA	SNX14	7.01895e-54	0.718404	0.441	0.276	2.40953e-49
FB.01.PDGFRA	DOP1A	1.56195e-135	0.71451	0.372	0.142	5.36202e-131
FB.01.PDGFRA	FCHO2	7.86676e-150	0.711825	0.475	0.211	2.70058e-145
FB.01.PDGFRA	VPS39	9.8905e-77	0.707042	0.303	0.135	3.39531e-72
FB.01.PDGFRA	ARMCX4	8.80767e-88	0.704147	0.341	0.154	3.02358e-83
FB.01.PDGFRA	EXOSC10	4.1513e-58	0.702694	0.283	0.138	1.4251e-53
FB.01.PDGFRA	MCM3AP	3.43541e-51	0.699928	0.283	0.145	1.17934e-46
FB.01.PDGFRA	KIF13A	1.61541e-125	0.69988	0.566	0.314	5.54553e-121
FB.01.PDGFRA	SLC25A12	8.47402e-82	0.699713	0.331	0.154	2.90905e-77
FB.01.PDGFRA	CEP350	9.25563e-82	0.697588	0.542	0.333	3.17737e-77
FB.01.PDGFRA	DPY19L1	3.74066e-54	0.694116	0.254	0.122	1.28413e-49
FB.01.PDGFRA	NHLRC2	7.66017e-31	0.69245	0.252	0.149	2.62966e-26
FB.01.PDGFRA	UBE4A	2.96391e-35	0.692228	0.278	0.162	1.01748e-30
FB.01.PDGFRA	TSC1	8.20561e-74	0.689526	0.277	0.121	2.8169e-69
FB.01.PDGFRA	LRIG2	7.79489e-67	0.685958	0.269	0.119	2.67591e-62
FB.01.PDGFRA	PWWP3A	1.09024e-56	0.680914	0.282	0.139	3.74269e-52
FB.01.PDGFRA	SZT2	2.82073e-79	0.678619	0.257	0.102	9.68328e-75
FB.01.PDGFRA	HBS1L	7.19117e-36	0.674213	0.251	0.141	2.46866e-31
FB.01.PDGFRA	CNOT1	1.44148e-31	0.671442	0.327	0.212	4.94845e-27
FB.01.PDGFRA	GATAD1	2.347e-60	0.668883	0.307	0.155	8.05702e-56
FB.01.PDGFRA	ATG4B	1.93565e-26	0.665205	0.256	0.158	6.64489e-22
FB.01.PDGFRA	DAZAP1	2.73465e-62	0.658337	0.307	0.151	9.3878e-58
FB.01.PDGFRA	RIPK1	1.19731e-27	0.65768	0.282	0.178	4.11023e-23
FB.01.PDGFRA	USP8	3.0355e-38	0.650927	0.363	0.23	1.04206e-33
FB.01.PDGFRA	SLC38A9	2.10681e-53	0.650525	0.269	0.133	7.23248e-49
FB.01.PDGFRA	NCBP3	1.13647e-59	0.640858	0.331	0.172	3.9014e-55
FB.01.PDGFRA	ANAPC4	9.91554e-107	0.640306	0.333	0.133	3.40391e-102
FB.01.PDGFRA	LINC01278	2.76125e-92	0.638433	0.275	0.104	9.47911e-88
FB.01.PDGFRA	LTN1	2.94166e-33	0.63715	0.265	0.156	1.00984e-28
FB.01.PDGFRA	FAR1	1.93129e-136	0.635669	0.485	0.229	6.62991e-132
FB.01.PDGFRA	ICE1	4.49182e-35	0.634935	0.32	0.197	1.542e-30
FB.01.PDGFRA	MAP3K3	1.92759e-52	0.628225	0.281	0.142	6.61722e-48
FB.01.PDGFRA	TRAPPC11	2.30059e-88	0.62188	0.295	0.119	7.89771e-84
FB.01.PDGFRA	PPP4R3A	5.07937e-51	0.61753	0.339	0.189	1.7437e-46
FB.01.PDGFRA	MSL1	5.26981e-35	0.616334	0.26	0.148	1.80907e-30
FB.01.PDGFRA	MMS19	2.99987e-88	0.61459	0.278	0.109	1.02983e-83
FB.01.PDGFRA	ATP2B4	0.117458	0.611522	0.316	0.334	1
FB.01.PDGFRA	INPP5B	3.08926e-90	0.606822	0.298	0.121	1.06051e-85
FB.01.PDGFRA	CC2D2A	1.31956e-47	0.597689	0.3	0.163	4.52991e-43
FB.01.PDGFRA	GCN1	2.21065e-63	0.591605	0.25	0.109	7.58894e-59
FB.01.PDGFRA	LARP1B	1.3311e-82	0.590043	0.325	0.149	4.56952e-78
FB.01.PDGFRA	DDX46	2.08304e-09	0.587197	0.394	0.319	7.15087e-05
FB.01.PDGFRA	DYNC2LI1	6.82334e-58	0.578483	0.257	0.12	2.34238e-53
FB.01.PDGFRA	RPRD2	4.36512e-25	0.571746	0.281	0.185	1.4985e-20
FB.01.PDGFRA	STXBP3	5.80907e-38	0.570873	0.306	0.181	1.9942e-33
FB.01.PDGFRA	PRPF40A	2.64879e-07	0.569233	0.359	0.303	0.00909302
FB.01.PDGFRA	ILKAP	4.99318e-55	0.562071	0.298	0.152	1.71411e-50
FB.01.PDGFRA	FBXO9	1.33994e-28	0.557869	0.295	0.187	4.59988e-24
FB.01.PDGFRA	UBE2E1	4.35581e-31	0.552723	0.447	0.325	1.49531e-26
FB.01.PDGFRA	ABHD18	3.15335e-73	0.549632	0.262	0.11	1.08251e-68
FB.01.PDGFRA	SLC10A7	3.67615e-61	0.547318	0.312	0.159	1.26199e-56
FB.01.PDGFRA	VPS35L	4.05119e-79	0.545693	0.364	0.179	1.39073e-74
FB.01.PDGFRA	MICALL2	9.4363e-105	0.541634	0.341	0.144	3.23939e-100
FB.01.PDGFRA	PCED1A	9.21448e-23	0.541353	0.251	0.157	3.16324e-18
FB.01.PDGFRA	DDHD2	8.06984e-96	0.540764	0.289	0.112	2.77029e-91
FB.01.PDGFRA	ZNF586	7.09407e-68	0.532893	0.259	0.112	2.43532e-63
FB.01.PDGFRA	TTC37	4.14845e-142	0.532648	0.295	0.09	1.42412e-137
FB.01.PDGFRA	CDC27	9.27217e-63	0.53087	0.459	0.276	3.18304e-58
FB.01.PDGFRA	STRN	1.68694e-25	0.530417	0.266	0.172	5.79108e-21
FB.01.PDGFRA	IST1	5.62041e-16	0.526342	0.288	0.208	1.92943e-11
FB.01.PDGFRA	GTF2E2	9.43026e-22	0.52478	0.253	0.163	3.23731e-17
FB.01.PDGFRA	WIPF1	2.31422e-176	0.520882	0.512	0.227	7.94448e-172
FB.01.PDGFRA	BIRC2	1.64604e-17	0.508523	0.253	0.175	5.65069e-13
FB.01.PDGFRA	TMEM181	1.79709e-75	0.507735	0.322	0.153	6.16923e-71
FB.01.PDGFRA	USP45	7.10191e-64	0.501543	0.262	0.118	2.43802e-59
FB.01.PDGFRA	HK1	5.5415e-36	0.500604	0.369	0.237	1.90234e-31
FB.01.PDGFRA	LRCH3	5.88876e-121	0.498598	0.495	0.246	2.02155e-116
FB.01.PDGFRA	CD2AP	9.46619e-14	0.492085	0.266	0.199	3.24965e-09
FB.01.PDGFRA	ADPGK	6.38742e-37	0.482989	0.294	0.171	2.19274e-32
FB.01.PDGFRA	NCOA6	9.03492e-57	0.482273	0.344	0.186	3.1016e-52
FB.01.PDGFRA	COMMD10	8.5109e-57	0.481834	0.414	0.252	2.92171e-52
FB.01.PDGFRA	G2E3	1.65134e-62	0.480012	0.272	0.127	5.66888e-58
FB.01.PDGFRA	PWWP2A	1.7869e-37	0.478716	0.291	0.169	6.13424e-33
FB.01.PDGFRA	NUDCD3	3.24234e-39	0.47493	0.304	0.176	1.11306e-34
FB.01.PDGFRA	BAZ2A	2.00763e-40	0.473126	0.349	0.212	6.89199e-36
FB.01.PDGFRA	TBK1	1.52803e-45	0.46696	0.299	0.165	5.24559e-41
FB.01.PDGFRA	EXOC2	6.25057e-55	0.464888	0.347	0.191	2.14576e-50
FB.01.PDGFRA	ATG10	2.69793e-74	0.464514	0.333	0.16	9.26172e-70
FB.01.PDGFRA	HNRNPD	0.202522	0.462671	0.346	0.334	1
FB.01.PDGFRA	POLI	1.63648e-84	0.461539	0.25	0.095	5.61786e-80
FB.01.PDGFRA	WDR37	3.15108e-100	0.459357	0.299	0.117	1.08173e-95
FB.01.PDGFRA	SNX4	1.33162e-33	0.44887	0.288	0.171	4.5713e-29
FB.01.PDGFRA	PRPSAP1	2.68985e-26	0.441736	0.28	0.179	9.23399e-22
FB.01.PDGFRA	CHD8	7.72828e-37	0.432973	0.292	0.171	2.65304e-32
FB.01.PDGFRA	BRAF	3.19003e-102	0.432885	0.519	0.287	1.09511e-97
FB.01.PDGFRA	KLHL42	1.1763e-24	0.426351	0.257	0.162	4.03814e-20
FB.01.PDGFRA	ARHGAP35	3.24248e-15	0.421113	0.339	0.252	1.11311e-10
FB.01.PDGFRA	KPNA1	1.82342e-47	0.421047	0.382	0.227	6.2596e-43
FB.01.PDGFRA	USP7	1.91956e-21	0.41811	0.266	0.175	6.58965e-17
FB.01.PDGFRA	MAP3K2	9.60905e-97	0.416868	0.491	0.277	3.29869e-92
FB.01.PDGFRA	WDR20	1.41691e-39	0.409377	0.278	0.155	4.8641e-35
FB.01.PDGFRA	HMBOX1	8.70449e-97	0.399521	0.464	0.242	2.98817e-92
FB.01.PDGFRA	AKAP8L	6.83881e-36	0.398164	0.311	0.187	2.34769e-31
FB.01.PDGFRA	FAM193B	4.40415e-69	0.396161	0.287	0.129	1.5119e-64
FB.01.PDGFRA	R3HDM2	8.67796e-54	0.392984	0.479	0.305	2.97906e-49
FB.01.PDGFRA	TM2D1	2.96923e-12	0.389846	0.297	0.224	1.01931e-07
FB.01.PDGFRA	FAF2	7.7395e-16	0.385122	0.252	0.174	2.65689e-11
FB.01.PDGFRA	ANKRD36B	2.69917e-103	0.384782	0.26	0.09	9.26599e-99
FB.01.PDGFRA	DANT2	1.37457e-305	0.38074	0.385	0.075	4.71878e-301
FB.01.PDGFRA	CWF19L2	2.05755e-34	0.380194	0.284	0.167	7.06338e-30
FB.01.PDGFRA	RALY	5.14086e-12	0.380114	0.267	0.343	1.7648e-07
FB.01.PDGFRA	PBRM1	3.27644e-35	0.374087	0.415	0.284	1.12477e-30
FB.01.PDGFRA	GOLGA2	4.42433e-16	0.370519	0.299	0.215	1.51883e-11
FB.01.PDGFRA	SPOP	1.57749e-25	0.356559	0.315	0.211	5.41538e-21
FB.01.PDGFRA	CPSF7	6.15484e-36	0.355564	0.266	0.15	2.1129e-31
FB.01.PDGFRA	SETX	4.89345e-132	0.346142	0.599	0.326	1.67987e-127
FB.01.PDGFRA	NR2C2	9.4123e-46	0.340748	0.31	0.174	3.23115e-41
FB.01.PDGFRA	WDR33	1.37881e-33	0.338719	0.396	0.264	4.73333e-29
FB.01.PDGFRA	FGD6	0	0.337231	0.447	0.101	0
FB.01.PDGFRA	RHBDD1	2.75282e-54	0.33579	0.251	0.121	9.45016e-50
FB.01.PDGFRA	BTBD7	6.73706e-34	0.312937	0.344	0.22	2.31277e-29
FB.01.PDGFRA	ERP44	0.00273916	0.306409	0.246	0.276	1
FB.01.PDGFRA	RARB	6.76411e-203	0.295745	0.523	0.213	2.32205e-198
FB.01.PDGFRA	CPSF6	4.76062e-69	0.290172	0.471	0.281	1.63427e-64
FB.01.PDGFRA	SCAMP1	5.50302e-20	0.268828	0.25	0.166	1.88913e-15
FB.01.PDGFRA	CDKAL1	6.13817e-113	0.266532	0.52	0.284	2.10717e-108
FB.01.PDGFRA	MIR181A1HG	2.31871e-84	0.266532	0.439	0.23	7.95991e-80
FB.01.PDGFRA	LRRC41	5.49762e-31	0.252826	0.259	0.152	1.88728e-26
FB.02.COL1A1	CYP1B1	1.87796e-190	#NUM!	0.568	0.147	6.44687e-186
FB.02.COL1A1	IGKC	4.64094e-172	#NUM!	0.423	0.09	1.59319e-167
FB.02.COL1A1	IGHG3	4.32993e-169	#NUM!	0.256	0.03	1.48642e-164
FB.02.COL1A1	COL3A1	8.26832e-120	#NUM!	0.918	0.719	2.83843e-115
FB.02.COL1A1	COL1A1	1.80832e-119	#NUM!	0.903	0.691	6.2078e-115
FB.02.COL1A1	CST3	3.16676e-104	#NUM!	0.827	0.57	1.08712e-99
FB.02.COL1A1	FBLN1	7.07532e-89	#NUM!	0.69	0.39	2.42889e-84
FB.02.COL1A1	HLA-C	1.00717e-19	#NUM!	0.69	0.584	3.4575e-15
FB.02.COL1A1	ITM2B	1.62983e-17	#NUM!	0.784	0.683	5.59503e-13
FB.02.COL1A1	ANXA2	1.99357e-17	#NUM!	0.66	0.554	6.84372e-13
FB.02.COL1A1	RPL37A	3.32845e-14	#NUM!	0.545	0.445	1.14263e-09
FB.02.COL1A1	RPS16	4.56985e-06	#NUM!	0.544	0.489	0.156878
FB.02.COL1A1	IFITM1	0.00660002	#NUM!	0.508	0.446	1
FB.02.COL1A1	RBP1	2.81571e-55	660.224	0.443	0.21	9.66605e-51
FB.02.COL1A1	IGFBP2	8.50532e-123	541.923	0.827	0.521	2.91979e-118
FB.02.COL1A1	COL1A2	2.30962e-104	511.853	0.954	0.84	7.92868e-100
FB.02.COL1A1	ATP5MG	0.0299515	507.298	0.364	0.336	1
FB.02.COL1A1	SVIL	0.000583111	465.898	0.404	0.434	1
FB.02.COL1A1	TMBIM6	0.0739958	423.619	0.52	0.502	1
FB.02.COL1A1	GNG5	0.00684029	378.898	0.338	0.298	1
FB.02.COL1A1	AIG1	1.44061e-16	375.918	0.162	0.315	4.94548e-12
FB.02.COL1A1	CTNNA1	1.56432e-15	355.814	0.313	0.461	5.37016e-11
FB.02.COL1A1	SSR4	1.60647e-28	342.761	0.528	0.36	5.51484e-24
FB.02.COL1A1	SFRP2	2.14745e-109	337.393	0.253	0.046	7.37198e-105
FB.02.COL1A1	SLC25A6	0.000283674	321.19	0.459	0.406	1
FB.02.COL1A1	TMEM59	3.65409e-07	303.878	0.517	0.451	0.0125441
FB.02.COL1A1	EFEMP2	2.39421e-43	302.434	0.455	0.245	8.21908e-39
FB.02.COL1A1	VAMP5	1.66979e-73	295.222	0.481	0.212	5.73222e-69
FB.02.COL1A1	CCL2	1.28998e-74	283.68	0.298	0.086	4.42838e-70
FB.02.COL1A1	SOD1	2.38881e-08	282.237	0.413	0.323	0.000820056
FB.02.COL1A1	SNU13	5.58622e-14	273.581	0.371	0.251	1.91769e-09
FB.02.COL1A1	PABPN1	4.13465e-07	273.581	0.197	0.287	0.0141938
FB.02.COL1A1	COMT	0.000127229	272.139	0.396	0.336	1
FB.02.COL1A1	PSMB1	0.000192136	259.154	0.455	0.4	1
FB.02.COL1A1	IL32	1.25999e-27	244.727	0.341	0.179	4.32542e-23
FB.02.COL1A1	HMGB1	0.574874	241.39	0.544	0.584	1
FB.02.COL1A1	PDIA3	9.19016e-15	236.071	0.562	0.441	3.15489e-10
FB.02.COL1A1	ATP5F1A	0.697475	236.071	0.273	0.266	1
FB.02.COL1A1	SERPINE1	0.134429	234.628	0.422	0.359	1
FB.02.COL1A1	VDAC3	0.155617	230.6	0.23	0.255	1
FB.02.COL1A1	RPL22L1	1.23705e-44	228.858	0.326	0.142	4.24666e-40
FB.02.COL1A1	RHOBTB3	0.573481	223.087	0.356	0.342	1
FB.02.COL1A1	EID1	5.07772e-24	223.087	0.526	0.356	1.74313e-19
FB.02.COL1A1	TTC3	0.0640142	220.202	0.461	0.463	1
FB.02.COL1A1	CLIC1	0.776644	220.018	0.392	0.391	1
FB.02.COL1A1	CNPY2	1.69894e-09	219.71	0.365	0.276	5.8323e-05
FB.02.COL1A1	ATF7IP	4.24813e-16	218.402	0.207	0.353	1.45834e-11
FB.02.COL1A1	PSMB9	2.05052e-22	215.874	0.298	0.164	7.03923e-18
FB.02.COL1A1	PCM1	2.32056e-24	205.939	0.311	0.51	7.96626e-20
FB.02.COL1A1	PLD3	2.82044e-26	200.004	0.478	0.313	9.68229e-22
FB.02.COL1A1	CLEC11A	6.65645e-31	200.004	0.419	0.244	2.28509e-26
FB.02.COL1A1	RPL23	7.77688e-12	197.118	0.495	0.393	2.66973e-07
FB.02.COL1A1	ERGIC3	4.71269e-09	195.676	0.335	0.249	0.000161782
FB.02.COL1A1	UFC1	5.17318e-08	189.905	0.25	0.174	0.0017759
FB.02.COL1A1	FRZB	4.03511e-05	187.02	0.435	0.371	1
FB.02.COL1A1	TFDP2	2.53527e-06	184.848	0.176	0.251	0.0870334
FB.02.COL1A1	PSAP	8.3872e-46	184.134	0.739	0.518	2.87924e-41
FB.02.COL1A1	KDELR3	3.87151e-45	181.249	0.267	0.097	1.32905e-40
FB.02.COL1A1	C12orf57	4.12558e-15	181.248	0.452	0.314	1.41627e-10
FB.02.COL1A1	NUCB2	9.94552e-30	176.921	0.34	0.175	3.4142e-25
FB.02.COL1A1	THOC2	5.57198e-18	172.593	0.255	0.412	1.9128e-13
FB.02.COL1A1	CRTAP	0.0499638	172.593	0.282	0.252	1
FB.02.COL1A1	SCFD1	2.1887e-18	171.487	0.228	0.388	7.51359e-14
FB.02.COL1A1	KDM5A	6.17765e-11	167.798	0.225	0.342	2.12072e-06
FB.02.COL1A1	COX7A2	4.29669e-05	166.822	0.42	0.351	1
FB.02.COL1A1	TUBB6	7.11417e-09	165.379	0.186	0.288	0.000244222
FB.02.COL1A1	BCAP29	3.24982e-07	161.051	0.258	0.348	0.0111563
FB.02.COL1A1	SERPINF1	1.70871e-101	159.608	0.376	0.104	5.86585e-97
FB.02.COL1A1	CLTA	0.756519	153.838	0.387	0.387	1
FB.02.COL1A1	TBCB	0.160507	149.51	0.259	0.239	1
FB.02.COL1A1	TBCA	0.215544	146.624	0.392	0.434	1
FB.02.COL1A1	PRELP	9.082e-33	146.598	0.376	0.206	3.11776e-28
FB.02.COL1A1	TCN2	3.93932e-91	146.173	0.297	0.074	1.35233e-86
FB.02.COL1A1	COL6A1	1.03575e-46	143.739	0.779	0.632	3.55563e-42
FB.02.COL1A1	ARF1	2.0924e-08	143.543	0.462	0.362	0.000718299
FB.02.COL1A1	TMED9	3.70561e-15	137.968	0.434	0.295	1.2721e-10
FB.02.COL1A1	UQCRQ	1.04736e-17	135.083	0.411	0.283	3.59547e-13
FB.02.COL1A1	SELENOF	0.0508146	133.64	0.364	0.338	1
FB.02.COL1A1	GSN	4.27276e-19	130.755	0.626	0.509	1.4668e-14
FB.02.COL1A1	PPIG	8.02588e-08	123.254	0.216	0.32	0.00275521
FB.02.COL1A1	VPS54	1.3415e-19	120.505	0.104	0.262	4.60525e-15
FB.02.COL1A1	YBX1	2.54657e-06	116.328	0.505	0.434	0.0874211
FB.02.COL1A1	HNRNPDL	1.32894e-14	114.922	0.441	0.589	4.56212e-10
FB.02.COL1A1	RPL14	1.45881e-08	114.885	0.534	0.461	0.000500796
FB.02.COL1A1	NDUFS8	2.41902e-10	111.999	0.31	0.212	8.30425e-06
FB.02.COL1A1	ATOX1	5.91328e-14	111.999	0.347	0.237	2.02997e-09
FB.02.COL1A1	SCPEP1	2.62305e-16	111.999	0.39	0.266	9.00466e-12
FB.02.COL1A1	EPB41L2	8.67855e-12	111.999	0.362	0.479	2.97926e-07
FB.02.COL1A1	TMEM258	2.25514e-17	111.191	0.396	0.277	7.74167e-13
FB.02.COL1A1	PRNP	1.91902e-26	109.114	0.294	0.138	6.5878e-22
FB.02.COL1A1	PPIB	6.46925e-41	109.111	0.721	0.53	2.22083e-36
FB.02.COL1A1	UBE2H	0.000727924	107.789	0.289	0.342	1
FB.02.COL1A1	MDK	8.16384e-30	106.229	0.411	0.233	2.80257e-25
FB.02.COL1A1	RALA	0.686291	103.343	0.25	0.256	1
FB.02.COL1A1	SDCCAG8	8.97783e-21	103.265	0.17	0.342	3.082e-16
FB.02.COL1A1	PTMA	0.000296762	99.0152	0.63	0.566	1
FB.02.COL1A1	SELENOM	4.87025e-11	99.0152	0.461	0.358	1.67191e-06
FB.02.COL1A1	RNASEH2C	0.00927532	97.5725	0.25	0.213	1
FB.02.COL1A1	SERPING1	4.56114e-54	96.1298	0.663	0.424	1.56579e-49
FB.02.COL1A1	TUBA1A	0.25261	93.2444	0.346	0.365	1
FB.02.COL1A1	EMC7	2.42977e-06	91.8017	0.28	0.21	0.0834116
FB.02.COL1A1	CTSD	2.33282e-18	91.8017	0.48	0.321	8.00835e-14
FB.02.COL1A1	LRPAP1	5.09322e-19	91.8016	0.389	0.247	1.74845e-14
FB.02.COL1A1	GGT5	7.22487e-13	83.1585	0.523	0.403	2.48023e-08
FB.02.COL1A1	ISLR	0	80.2602	0.693	0.148	0
FB.02.COL1A1	EEF1B2	7.59598e-11	77.3748	0.44	0.325	2.60762e-06
FB.02.COL1A1	SH3PXD2A	4.10401e-08	75.7257	0.182	0.275	0.00140887
FB.02.COL1A1	OGN	5.23148e-133	74.8457	0.258	0.04	1.79592e-128
FB.02.COL1A1	STRAP	0.188561	74.4894	0.244	0.27	1
FB.02.COL1A1	COL6A2	1.56779e-60	73.4836	0.842	0.673	5.38206e-56
FB.02.COL1A1	C4orf48	5.94743e-34	71.8955	0.306	0.139	2.04169e-29
FB.02.COL1A1	SLTM	5.87688e-09	71.6039	0.252	0.36	0.000201747
FB.02.COL1A1	CAPN2	0.49336	70.1516	0.316	0.301	1
FB.02.COL1A1	IFI27	7.50578e-20	68.7186	0.539	0.396	2.57666e-15
FB.02.COL1A1	SPECC1L	1.11807e-21	68.7186	0.167	0.338	3.83823e-17
FB.02.COL1A1	TAPBP	4.96109e-05	67.2759	0.371	0.3	1
FB.02.COL1A1	PHF3	1.48076e-17	67.0742	0.185	0.341	5.08329e-13
FB.02.COL1A1	CHMP5	0.000277766	65.8332	0.297	0.241	1
FB.02.COL1A1	SEM1	0.00779034	64.3893	0.356	0.422	1
FB.02.COL1A1	NME1	8.13294e-19	62.9478	0.252	0.132	2.79196e-14
FB.02.COL1A1	LAPTM4A	9.31889e-13	58.6197	0.61	0.512	3.19908e-08
FB.02.COL1A1	TSPAN4	3.32395e-06	56.7224	0.286	0.215	0.114108
FB.02.COL1A1	SNRPD2	8.81226e-11	55.7344	0.358	0.268	3.02516e-06
FB.02.COL1A1	GYPC	1.13549e-09	55.7343	0.303	0.218	3.89803e-05
FB.02.COL1A1	UBE2G2	5.95877e-06	54.4047	0.179	0.256	0.204558
FB.02.COL1A1	CFH	1.96499e-19	52.849	0.693	0.542	6.74562e-15
FB.02.COL1A1	CCDC85B	7.48308e-11	52.849	0.283	0.184	2.56887e-06
FB.02.COL1A1	C1orf122	8.66755e-06	49.2441	0.295	0.227	0.297548
FB.02.COL1A1	PDCD5	0.0253658	48.5209	0.276	0.248	1
FB.02.COL1A1	SPAG9	8.11694e-13	48.5209	0.297	0.429	2.78646e-08
FB.02.COL1A1	KANK2	0.719106	48.5209	0.274	0.276	1
FB.02.COL1A1	CLMN	5.67596e-35	48.5204	0.089	0.313	1.9485e-30
FB.02.COL1A1	LAMC1	2.50259e-06	48.0124	0.477	0.558	0.0859112
FB.02.COL1A1	NOTCH3	8.09944e-26	47.0781	0.319	0.521	2.78046e-21
FB.02.COL1A1	COL4A2	1.45736e-26	46.6475	0.684	0.831	5.00297e-22
FB.02.COL1A1	VPS13C	5.0444e-22	45.6355	0.23	0.416	1.73169e-17
FB.02.COL1A1	AEBP1	1.01395e-97	45.6355	0.724	0.387	3.48079e-93
FB.02.COL1A1	SGCE	0.0326158	42.7501	0.232	0.266	1
FB.02.COL1A1	SFRP4	2.78551e-186	42.7501	0.417	0.078	9.56239e-182
FB.02.COL1A1	ARPC1B	5.3148e-08	41.3074	0.398	0.309	0.00182452
FB.02.COL1A1	RBPJ	0.0136525	40.8609	0.246	0.289	1
FB.02.COL1A1	INAFM1	4.9446e-06	39.4019	0.264	0.194	0.169743
FB.02.COL1A1	FSTL1	9.65191e-11	38.422	0.736	0.628	3.3134e-06
FB.02.COL1A1	AGRN	1.5987e-08	37.6809	0.179	0.279	0.000548818
FB.02.COL1A1	BTF3	6.30276e-06	36.9793	0.459	0.4	0.216367
FB.02.COL1A1	DYNC1H1	1.0053e-05	36.9793	0.395	0.465	0.34511
FB.02.COL1A1	COL6A3	1.6853e-85	36.9793	0.769	0.387	5.78547e-81
FB.02.COL1A1	MRFAP1	0.00593042	32.6512	0.291	0.248	1
FB.02.COL1A1	SEC61G	8.22771e-10	32.6374	0.407	0.308	2.82449e-05
FB.02.COL1A1	VEZT	2.43008e-08	31.7838	0.201	0.295	0.000834222
FB.02.COL1A1	KIRREL1	3.33851e-18	31.2085	0.198	0.362	1.14608e-13
FB.02.COL1A1	OST4	2.73403e-25	31.1984	0.48	0.32	9.38565e-21
FB.02.COL1A1	XBP1	2.66509e-22	31.1439	0.331	0.186	9.14899e-18
FB.02.COL1A1	ATP5F1E	0.00126887	30.0418	0.399	0.349	1
FB.02.COL1A1	LTBP4	1.84758e-09	28.352	0.268	0.182	6.34256e-05
FB.02.COL1A1	PSME2	5.07198e-08	28.3232	0.314	0.235	0.00174116
FB.02.COL1A1	NDUFA13	0.000254758	26.8805	0.438	0.374	1
FB.02.COL1A1	APOL1	1.94597e-57	26.8805	0.325	0.117	6.68033e-53
FB.02.COL1A1	MAP1LC3A	2.74378e-08	26.8805	0.235	0.337	0.000941911
FB.02.COL1A1	LTBP2	5.45069e-74	26.6977	0.572	0.263	1.87117e-69
FB.02.COL1A1	ATP6V1G1	0.0134756	26.2552	0.404	0.348	1
FB.02.COL1A1	YWHAG	0.000168092	25.7942	0.207	0.273	1
FB.02.COL1A1	PLAC9	0.418029	25.4377	0.28	0.268	1
FB.02.COL1A1	DDX39B	3.00065e-23	24.9722	0.17	0.355	1.03009e-18
FB.02.COL1A1	PRDX4	1.58298e-39	23.9951	0.44	0.234	5.4342e-35
FB.02.COL1A1	STAT1	3.89241e-05	23.9951	0.443	0.377	1
FB.02.COL1A1	AHCYL1	0.286544	23.8054	0.235	0.25	1
FB.02.COL1A1	CLDN11	3.62866e-98	23.524	0.465	0.161	1.24568e-93
FB.02.COL1A1	LAMP2	0.0132566	23.4771	0.253	0.29	1
FB.02.COL1A1	PSMA2	1.71175e-05	22.5524	0.356	0.287	0.587626
FB.02.COL1A1	FIS1	2.57041e-05	19.667	0.308	0.244	0.882395
FB.02.COL1A1	KAT6B	8.90802e-18	18.2011	0.151	0.305	3.05803e-13
FB.02.COL1A1	KHDRBS1	3.36484e-13	18.0471	0.264	0.403	1.15512e-08
FB.02.COL1A1	KPNB1	0.849639	16.7816	0.295	0.291	1
FB.02.COL1A1	SUSD2	8.34368e-57	16.1871	0.295	0.102	2.8643e-52
FB.02.COL1A1	USP34	1.78174e-33	15.6447	0.279	0.51	6.11653e-29
FB.02.COL1A1	COPS9	1.70313e-07	14.953	0.28	0.203	0.00584668
FB.02.COL1A1	VPS29	0.0982597	14.8756	0.259	0.29	1
FB.02.COL1A1	PAFAH1B1	9.70796e-21	13.591	0.291	0.467	3.33265e-16
FB.02.COL1A1	R3HDM1	1.675e-16	13.5756	0.121	0.264	5.75012e-12
FB.02.COL1A1	NDUFA1	3.99226e-11	12.4534	0.382	0.267	1.3705e-06
FB.02.COL1A1	RWDD1	0.000326098	12.3429	0.304	0.248	1
FB.02.COL1A1	GALNT1	0.859188	12.1761	0.285	0.283	1
FB.02.COL1A1	NEK1	3.84031e-14	12.0593	0.156	0.284	1.31834e-09
FB.02.COL1A1	FMOD	1.28783e-159	11.9444	0.355	0.064	4.42099e-155
FB.02.COL1A1	PPDPF	2.32291e-29	11.5629	0.49	0.31	7.97431e-25
FB.02.COL1A1	CDC42BPB	3.23393e-11	11.3238	0.201	0.32	1.11018e-06
FB.02.COL1A1	LRP1	3.32781e-31	11.0108	0.611	0.425	1.1424e-26
FB.02.COL1A1	GSTP1	5.61622e-17	11.0072	0.492	0.35	1.92799e-12
FB.02.COL1A1	CPXM1	1.0293e-48	10.9681	0.291	0.109	3.53349e-44
FB.02.COL1A1	PLAAT4	6.39438e-80	10.1431	0.304	0.086	2.19513e-75
FB.02.COL1A1	EIF2S2	4.08057e-06	10.0288	0.347	0.28	0.140082
FB.02.COL1A1	CCN1	0.0169296	9.82024	0.395	0.365	1
FB.02.COL1A1	TMEM147	1.46964e-10	9.78904	0.297	0.199	5.04514e-06
FB.02.COL1A1	ERP29	0.0103243	9.76646	0.268	0.227	1
FB.02.COL1A1	TXNDC5	5.36469e-17	9.69029	0.258	0.146	1.84165e-12
FB.02.COL1A1	PMP22	2.74737e-25	9.57773	0.539	0.369	9.43146e-21
FB.02.COL1A1	CTSA	2.11554e-16	9.56812	0.343	0.219	7.26242e-12
FB.02.COL1A1	NDUFB7	1.26311e-05	9.56812	0.346	0.271	0.433612
FB.02.COL1A1	CSDE1	0.18932	9.56812	0.347	0.37	1
FB.02.COL1A1	PHLDB1	3.68094e-05	9.37666	0.267	0.336	1
FB.02.COL1A1	NID1	0.0179044	8.67702	0.531	0.569	1
FB.02.COL1A1	UBE2N	0.00916095	8.51976	0.206	0.255	1
FB.02.COL1A1	MXRA5	3.7824e-18	8.47875	0.34	0.204	1.29846e-13
FB.02.COL1A1	UACA	1.41253e-36	8.12494	0.538	0.728	4.84907e-32
FB.02.COL1A1	COX6B1	3.491e-09	8.11559	0.434	0.326	0.000119843
FB.02.COL1A1	PNRC1	0.962026	8.0483	0.367	0.36	1
FB.02.COL1A1	ZC3H13	9.75112e-05	7.55583	0.212	0.281	1
FB.02.COL1A1	GPX8	7.84121e-24	7.2919	0.303	0.158	2.69181e-19
FB.02.COL1A1	NASP	0.000556508	7.22602	0.207	0.268	1
FB.02.COL1A1	DGUOK	0.212677	6.98933	0.262	0.244	1
FB.02.COL1A1	ERLEC1	1.5923e-07	6.86106	0.328	0.245	0.00546622
FB.02.COL1A1	CD248	2.53635e-10	6.8045	0.343	0.237	8.70702e-06
FB.02.COL1A1	WWTR1	0.0184724	6.68273	0.325	0.357	1
FB.02.COL1A1	EIF5B	0.0022966	6.68263	0.316	0.27	1
FB.02.COL1A1	HMGN3	0.149937	6.6768	0.317	0.347	1
FB.02.COL1A1	GATAD2A	6.72152e-08	6.65286	0.158	0.25	0.00230743
FB.02.COL1A1	SCARB2	0.175886	6.5376	0.416	0.385	1
FB.02.COL1A1	STX8	1.27835e-09	6.47693	0.201	0.306	4.38846e-05
FB.02.COL1A1	CPNE1	0.0759165	6.44047	0.218	0.25	1
FB.02.COL1A1	IGFBP4	2.70702e-11	6.21925	0.744	0.612	9.29293e-07
FB.02.COL1A1	PPIC	9.81084e-49	5.81636	0.356	0.149	3.36796e-44
FB.02.COL1A1	GPC1	1.61653e-06	5.50145	0.259	0.189	0.0554938
FB.02.COL1A1	RTRAF	0.519495	5.23981	0.276	0.27	1
FB.02.COL1A1	CSNK2B	0.422584	5.07216	0.288	0.276	1
FB.02.COL1A1	SH3GLB1	0.287047	5.03978	0.328	0.345	1
FB.02.COL1A1	NPEPPS	6.77373e-13	4.92622	0.24	0.368	2.32535e-08
FB.02.COL1A1	LOXL1	1.83286e-27	4.55501	0.314	0.159	6.29202e-23
FB.02.COL1A1	WASHC4	2.01342e-27	4.2347	0.182	0.388	6.91186e-23
FB.02.COL1A1	WDFY3	1.39998e-50	4.16715	0.197	0.489	4.80601e-46
FB.02.COL1A1	NR2F1	6.97866e-41	3.91259	0.501	0.287	2.3957e-36
FB.02.COL1A1	HTRA1	1.5869e-35	3.77997	0.355	0.174	5.44768e-31
FB.02.COL1A1	CKAP4	3.41147e-33	3.70428	0.37	0.19	1.17112e-28
FB.02.COL1A1	MAP3K2	2.15286e-17	3.43018	0.185	0.338	7.39055e-13
FB.02.COL1A1	ATP5IF1	1.47851e-06	3.35296	0.301	0.23	0.0507557
FB.02.COL1A1	CHPF	4.67205e-16	3.18568	0.274	0.157	1.60387e-11
FB.02.COL1A1	ABHD2	0.000345704	3.14255	0.215	0.279	1
FB.02.COL1A1	CCNL2	1.14877e-17	2.84289	0.215	0.367	3.94361e-13
FB.02.COL1A1	SLC25A36	7.77026e-18	2.65064	0.143	0.299	2.66745e-13
FB.02.COL1A1	TYMP	3.0236e-21	2.46201	0.331	0.194	1.03797e-16
FB.02.COL1A1	COPA	0.000588656	2.35464	0.35	0.405	1
FB.02.COL1A1	CLTB	9.9605e-13	2.22935	0.338	0.23	3.41934e-08
FB.02.COL1A1	SF1	2.09106e-11	2.21063	0.314	0.43	7.17841e-07
FB.02.COL1A1	SNRPB2	1.85363e-05	2.08454	0.289	0.222	0.636334
FB.02.COL1A1	LSM7	2.68942e-05	2.00828	0.265	0.205	0.92325
FB.02.COL1A1	NDUFB4	8.17181e-07	1.88045	0.322	0.247	0.028053
FB.02.COL1A1	SF3B5	1.80473e-10	1.85633	0.304	0.207	6.19545e-06
FB.02.COL1A1	UBE2L3	0.0111216	1.82965	0.297	0.258	1
FB.02.COL1A1	TIMM8B	7.02417e-19	1.81003	0.285	0.161	2.41133e-14
FB.02.COL1A1	CMTM3	5.02827e-11	1.80529	0.265	0.17	1.72615e-06
FB.02.COL1A1	MRPL41	3.41867e-07	1.70889	0.274	0.201	0.0117359
FB.02.COL1A1	MZT2B	5.27165e-07	1.69622	0.334	0.259	0.018097
FB.02.COL1A1	MRPL20	0.00517317	1.67499	0.274	0.24	1
FB.02.COL1A1	GTF2H5	6.74016e-10	1.63112	0.253	0.167	2.31383e-05
FB.02.COL1A1	SRM	3.6319e-16	1.59699	0.277	0.163	1.24679e-11
FB.02.COL1A1	CTSF	6.67586e-30	1.56059	0.262	0.118	2.29176e-25
FB.02.COL1A1	CREB3L2	7.63323e-05	1.49129	0.255	0.318	1
FB.02.COL1A1	ARHGAP35	4.90195e-15	1.48584	0.142	0.282	1.68279e-10
FB.02.COL1A1	MPG	3.94242e-07	1.25644	0.28	0.205	0.0135339
FB.02.COL1A1	GSK3B	7.77656e-22	1.2386	0.212	0.389	2.66961e-17
FB.02.COL1A1	NDUFB9	1.11407e-08	1.18322	0.35	0.257	0.000382448
FB.02.COL1A1	HNRNPA0	7.40068e-07	1.17931	0.288	0.209	0.0254058
FB.02.COL1A1	DRAP1	1.20035e-13	1.16384	0.352	0.232	4.12069e-09
FB.02.COL1A1	GRINA	9.43387e-09	1.04018	0.273	0.187	0.000323855
FB.02.COL1A1	VAMP2	0.00466992	0.92467	0.32	0.275	1
FB.02.COL1A1	CLIP1	3.29066e-07	0.911948	0.171	0.257	0.0112965
FB.02.COL1A1	OCIAD1	0.0688524	0.911948	0.311	0.347	1
FB.02.COL1A1	RNF181	8.45987e-15	0.886743	0.279	0.166	2.90419e-10
FB.02.COL1A1	DOCK4	2.65464e-18	0.823721	0.122	0.275	9.11313e-14
FB.02.COL1A1	PFDN2	1.90582e-08	0.801395	0.308	0.223	0.000654249
FB.02.COL1A1	PDLIM4	9.55459e-42	0.768908	0.282	0.111	3.27999e-37
FB.02.COL1A1	CSPG4	1.77061e-27	0.744045	0.076	0.264	6.07833e-23
FB.02.COL1A1	BANF1	1.6692e-06	0.739815	0.306	0.228	0.057302
FB.02.COL1A1	MARCKS	1.65169e-08	0.721705	0.444	0.339	0.00056701
FB.02.COL1A1	SLC39A7	3.0967e-09	0.460478	0.268	0.184	0.000106307
FB.02.COL1A1	GNAI3	1.17603e-06	0.386691	0.185	0.271	0.0403721
FB.02.COL1A1	LAMP1	1.16999e-14	0.329612	0.443	0.307	4.01647e-10
FB.02.COL1A1	ATP6V0B	7.34624e-06	0.262671	0.368	0.29	0.252189
FB.03.MMP14	DIAPH3	5.06819e-169	261.071	0.26	0.043	1.73986e-164
FB.03.MMP14	PTPN14	1.51805e-138	247.966	0.509	0.2	5.21133e-134
FB.03.MMP14	NAV1	9.14605e-46	194.553	0.549	0.337	3.13975e-41
FB.03.MMP14	SMYD3	9.89431e-35	190.443	0.258	0.472	3.39662e-30
FB.03.MMP14	ATRN	0.012518	178.059	0.254	0.22	1
FB.03.MMP14	PLCB4	1.07822e-36	136.879	0.136	0.323	3.70141e-32
FB.03.MMP14	RNF24	0.631949	120.469	0.273	0.278	1
FB.03.MMP14	ANKRD10	6.10719e-35	112.019	0.32	0.531	2.09654e-30
FB.03.MMP14	GALNT2	1.57189e-37	106.7	0.458	0.285	5.39613e-33
FB.03.MMP14	KDM6A	0.00102308	97.9084	0.287	0.346	1
FB.03.MMP14	PTPRA	6.29372e-26	97.0762	0.281	0.425	2.16057e-21
FB.03.MMP14	ST6GALNAC5	0	90.8965	0.399	0.012	0
FB.03.MMP14	RPS6KC1	1.3468e-24	89.4504	0.162	0.31	4.62342e-20
FB.03.MMP14	TASP1	5.42779e-51	76.2836	0.066	0.267	1.86331e-46
FB.03.MMP14	SLC9A7	7.41322e-273	70.3516	0.307	0.035	2.54488e-268
FB.03.MMP14	SCCPDH	9.89147e-27	68.6217	0.259	0.145	3.39564e-22
FB.03.MMP14	BCAR3	2.6505e-50	67.8133	0.263	0.114	9.09889e-46
FB.03.MMP14	TENM2	0	59.3144	0.541	0.023	0
FB.03.MMP14	NEK7	3.54115e-05	58.3202	0.361	0.307	1
FB.03.MMP14	TM4SF1	0	54.774	0.741	0.169	0
FB.03.MMP14	WDFY2	1.22424e-39	45.7509	0.11	0.293	4.20269e-35
FB.03.MMP14	CANX	0	43.2878	0.841	0.348	0
FB.03.MMP14	RABGAP1L	2.08346e-60	42.2511	0.162	0.415	7.15232e-56
FB.03.MMP14	HSPA5	0	41.845	0.795	0.323	0
FB.03.MMP14	PDE4DIP	3.09967e-44	40.1691	0.389	0.211	1.06409e-39
FB.03.MMP14	EPSTI1	0.824222	39.5434	0.337	0.344	1
FB.03.MMP14	CDC42BPA	2.55518e-94	39.0671	0.278	0.578	8.77169e-90
FB.03.MMP14	PLS3	7.77086e-59	38.9597	0.612	0.396	2.66766e-54
FB.03.MMP14	ZC3HAV1	0.0107657	38.9597	0.27	0.247	1
FB.03.MMP14	SRGAP2	3.11411e-21	38.8305	0.136	0.269	1.06904e-16
FB.03.MMP14	AHNAK	3.40087e-222	38.4664	0.765	0.384	1.16749e-217
FB.03.MMP14	N4BP2L2	7.31804e-131	37.3013	0.209	0.612	2.51221e-126
FB.03.MMP14	PLAUR	0	35.6488	0.685	0.104	0
FB.03.MMP14	SCD	0	35.2479	0.548	0.053	0
FB.03.MMP14	ARID4B	2.82665e-56	34.4784	0.227	0.476	9.7036e-52
FB.03.MMP14	EZR	0	33.8612	0.715	0.186	0
FB.03.MMP14	CLU	2.98576e-61	33.1889	0.29	0.115	1.02498e-56
FB.03.MMP14	MTAP	8.75771e-05	32.9779	0.274	0.232	1
FB.03.MMP14	DYRK1A	1.50735e-56	31.4543	0.124	0.353	5.17459e-52
FB.03.MMP14	TIMP2	4.96754e-225	31.29	0.767	0.397	1.70531e-220
FB.03.MMP14	JPX	1.15451e-11	31.2223	0.271	0.413	3.96331e-07
FB.03.MMP14	MAPK9	1.53628e-290	28.3902	0.452	0.085	5.27389e-286
FB.03.MMP14	IPO5	1.50295e-32	28.0781	0.262	0.135	5.15947e-28
FB.03.MMP14	RNF115	8.73598e-49	27.3813	0.158	0.371	2.99897e-44
FB.03.MMP14	TRIM24	9.47754e-47	25.9683	0.331	0.169	3.25354e-42
FB.03.MMP14	SDC4	0	25.6248	0.452	0.054	0
FB.03.MMP14	KRT8	0	25.4882	0.675	0.107	0
FB.03.MMP14	NT5C2	0.710551	25.1327	0.289	0.289	1
FB.03.MMP14	ATP1B1	4.12391e-140	24.3596	0.315	0.078	1.4157e-135
FB.03.MMP14	PIK3C3	7.47488e-55	23.6717	0.058	0.264	2.56605e-50
FB.03.MMP14	BRWD1	1.69832e-38	23.3734	0.147	0.334	5.83017e-34
FB.03.MMP14	MT-ND6	0	23.09	0.874	0.169	0
FB.03.MMP14	CDH1	0	22.8016	0.357	0.023	0
FB.03.MMP14	ZNF675	1.3344e-233	22.6841	0.334	0.055	4.58087e-229
FB.03.MMP14	EXOC4	2.66955e-91	22.2322	0.183	0.51	9.1643e-87
FB.03.MMP14	PRRG1	4.30268e-28	22.0413	0.254	0.138	1.47707e-23
FB.03.MMP14	PXDN	5.76778e-178	21.6128	0.698	0.349	1.98002e-173
FB.03.MMP14	CNTLN	1.1109e-10	21.4804	0.206	0.308	3.81359e-06
FB.03.MMP14	ITPR1	7.88947e-112	21.1905	0.024	0.352	2.70838e-107
FB.03.MMP14	TBL1X	2.07701e-08	20.017	0.182	0.259	0.000713017
FB.03.MMP14	DYSF	0	19.9647	0.291	0.016	0
FB.03.MMP14	MFAP5	0	19.5547	0.654	0.022	0
FB.03.MMP14	PUM3	9.08284e-21	18.762	0.352	0.244	3.11805e-16
FB.03.MMP14	PLAC8	0	18.6238	0.395	0.006	0
FB.03.MMP14	RIC1	7.13875e-09	18.5097	0.242	0.336	0.000245066
FB.03.MMP14	TENM3	1.01572e-150	18.189	0.427	0.125	3.48687e-146
FB.03.MMP14	WWC3	6.25947e-66	17.8223	0.327	0.136	2.14881e-61
FB.03.MMP14	TNFSF10	1.53825e-206	17.7968	0.361	0.072	5.28065e-202
FB.03.MMP14	DHRSX	2.71549e-07	17.7567	0.313	0.25	0.00932202
FB.03.MMP14	FER	3.25797e-51	17.2931	0.199	0.435	1.11843e-46
FB.03.MMP14	TIAM2	3.29615e-17	16.4773	0.136	0.253	1.13154e-12
FB.03.MMP14	ARGLU1	7.05382e-117	15.7662	0.206	0.58	2.42151e-112
FB.03.MMP14	MMP14	0	15.6287	0.73	0.242	0
FB.03.MMP14	VWA8	7.65064e-52	14.705	0.105	0.324	2.62639e-47
FB.03.MMP14	PAN3	6.55509e-89	14.4276	0.12	0.427	2.2503e-84
FB.03.MMP14	CALB2	0	14.2892	0.302	0.009	0
FB.03.MMP14	CDC73	1.37476e-15	13.907	0.183	0.29	4.7194e-11
FB.03.MMP14	HSPG2	7.12888e-175	13.7442	0.569	0.221	2.44727e-170
FB.03.MMP14	GAS6	0	13.7072	0.794	0.113	0
FB.03.MMP14	AFAP1	5.72008e-10	12.9614	0.404	0.31	1.96365e-05
FB.03.MMP14	SPIDR	2.35344e-62	12.7863	0.189	0.461	8.07913e-58
FB.03.MMP14	FKBP10	0.0421849	12.5285	0.326	0.352	1
FB.03.MMP14	SMG1	4.22252e-09	12.4989	0.406	0.316	0.000144955
FB.03.MMP14	ACSL4	4.23238e-22	11.9857	0.375	0.247	1.45293e-17
FB.03.MMP14	NOTCH2	2.58378e-40	11.7819	0.134	0.323	8.86985e-36
FB.03.MMP14	ZFP30	8.30294e-129	11.5689	0.314	0.087	2.85031e-124
FB.03.MMP14	TEK	0	11.5574	0.413	0.031	0
FB.03.MMP14	ANKRD36	8.07121e-20	11.346	0.141	0.267	2.77077e-15
FB.03.MMP14	RFX3	1.9961e-24	11.3314	0.134	0.277	6.85241e-20
FB.03.MMP14	BRD2	0.000292591	11.0154	0.207	0.254	1
FB.03.MMP14	ANXA3	0	10.9557	0.279	0.011	0
FB.03.MMP14	DISC1	5.05697e-93	10.8027	0.041	0.335	1.73601e-88
FB.03.MMP14	PLEC	6.16475e-276	10.378	0.662	0.225	2.1163e-271
FB.03.MMP14	CDCP1	0	10.2074	0.348	0.019	0
FB.03.MMP14	MSN	5.5224e-120	10.1058	0.672	0.372	1.89578e-115
FB.03.MMP14	UBA1	2.46489e-19	9.98839	0.322	0.213	8.46174e-15
FB.03.MMP14	ZNF676	4.44652e-236	9.96909	0.251	0.026	1.52645e-231
FB.03.MMP14	AXL	2.51406e-67	9.67932	0.582	0.371	8.63051e-63
FB.03.MMP14	COLGALT1	4.12656e-113	9.62087	0.418	0.165	1.41661e-108
FB.03.MMP14	GON4L	5.34444e-30	9.0984	0.124	0.279	1.83469e-25
FB.03.MMP14	SNX25	0.0153272	8.94281	0.222	0.26	1
FB.03.MMP14	TXNRD1	0	8.74034	0.677	0.16	0
FB.03.MMP14	DCAF6	8.56063e-64	8.67719	0.113	0.36	2.93878e-59
FB.03.MMP14	ROR1	3.22857e-69	8.66132	0.334	0.137	1.10834e-64
FB.03.MMP14	CD274	0	8.64263	0.251	0.011	0
FB.03.MMP14	COBLL1	8.82132e-39	8.64234	0.358	0.566	3.02827e-34
[truncated: 2,440 more rows]

## Sheet: Vascular
celltype	gene	p_val	avg_log2FC	pct.1	pct.2	p_val_adj
Art.01.EFNB2	SPARC	0.000949263	136.139	0.597	0.79	1
Art.01.EFNB2	NKAIN2	3.46089e-46	131.783	0.282	0.032	1.18809e-41
Art.01.EFNB2	AC019197.1	6.71102e-54	97.186	0.25	0.02	2.30383e-49
Art.01.EFNB2	TACC1	1.69204e-08	92.858	0.847	0.797	0.000580861
Art.01.EFNB2	DKK2	1.27619e-138	90.8965	0.403	0.017	4.38105e-134
Art.01.EFNB2	RNF144B	2.51467e-09	73.4292	0.629	0.419	8.63262e-05
Art.01.EFNB2	SCN2A	1.2101e-46	63.1853	0.323	0.041	4.15415e-42
Art.01.EFNB2	ERO1A	0.000595228	58.0232	0.347	0.226	1
Art.01.EFNB2	ARL15	5.14475e-31	55.3479	0.911	0.693	1.76614e-26
Art.01.EFNB2	ENG	0.0825413	53.1244	0.702	0.669	1
Art.01.EFNB2	CP	9.36277e-29	48.1344	0.315	0.061	3.21414e-24
Art.01.EFNB2	PDZRN3	5.96123e-28	48.1344	0.468	0.14	2.04643e-23
Art.01.EFNB2	PODXL	2.7066e-06	46.6881	0.895	0.759	0.0929147
Art.01.EFNB2	PCSK5	1.14897e-30	46.5978	0.556	0.172	3.94429e-26
Art.01.EFNB2	GSN	1.51794e-07	43.8063	0.839	0.644	0.00521093
Art.01.EFNB2	HYAL2	4.41657e-05	43.5365	0.694	0.543	1
Art.01.EFNB2	SLC45A4	1.18479e-36	36.5839	0.5	0.117	4.06727e-32
Art.01.EFNB2	CAMK2D	1.31611e-07	33.7075	0.573	0.374	0.00451806
Art.01.EFNB2	RALGAPA1	9.40531e-09	33.6327	0.702	0.531	0.000322875
Art.01.EFNB2	PECAM1	8.38047e-12	33.3942	0.96	0.785	2.87693e-07
Art.01.EFNB2	COL8A1	8.26985e-50	30.8221	0.5	0.092	2.83896e-45
Art.01.EFNB2	CXCL2	1.52529e-23	29.1962	0.331	0.079	5.23616e-19
Art.01.EFNB2	CCSER2	0.100235	28.9908	0.524	0.49	1
Art.01.EFNB2	HSPA8	0.0503096	28.8858	0.532	0.466	1
Art.01.EFNB2	MECOM	1.93678e-16	27.8664	0.903	0.763	6.64877e-12
Art.01.EFNB2	BTG2	0.00156826	27.787	0.427	0.301	1
Art.01.EFNB2	SESN3	0.000237438	27.7257	0.274	0.165	1
Art.01.EFNB2	SEMA3G	2.20905e-86	25.293	0.669	0.104	7.58345e-82
Art.01.EFNB2	ELN	5.03013e-57	25.0513	0.427	0.061	1.72679e-52
Art.01.EFNB2	KCTD12	1.576e-18	24.8494	0.5	0.205	5.41027e-14
Art.01.EFNB2	SPECC1	2.56155e-35	22.6219	0.339	0.06	8.79354e-31
Art.01.EFNB2	CDC27	0.670236	22.5621	0.444	0.433	1
Art.01.EFNB2	SEMA3F	0.0875455	21.4457	0.363	0.313	1
Art.01.EFNB2	GRN	0.24522	21.2928	0.371	0.346	1
Art.01.EFNB2	ESAM	0.843359	20.2846	0.613	0.626	1
Art.01.EFNB2	FBLN5	1.76366e-214	20.2708	0.556	0.02	6.05445e-210
Art.01.EFNB2	KIF13B	6.9771e-11	19.9832	0.524	0.289	2.39517e-06
Art.01.EFNB2	TRA2B	0.0251133	19.5467	0.387	0.492	1
Art.01.EFNB2	RAPGEF1	6.17253e-06	19.2805	0.75	0.621	0.211897
Art.01.EFNB2	CTNNB1	0.384281	19.2249	0.758	0.761	1
Art.01.EFNB2	ICAM2	4.29536e-06	19.2023	0.597	0.397	0.147455
Art.01.EFNB2	ACSL3	0.395515	18.28	0.379	0.427	1
Art.01.EFNB2	RPS6KA5	8.55303e-17	18.2566	0.46	0.182	2.93617e-12
Art.01.EFNB2	CD34	7.4985e-05	17.8115	0.726	0.572	1
Art.01.EFNB2	SLC7A11	0.115617	17.5048	0.411	0.373	1
Art.01.EFNB2	SMURF2	0.0133366	17.0541	0.573	0.46	1
Art.01.EFNB2	ATP13A3	3.0256e-12	16.5628	0.476	0.235	1.03866e-07
Art.01.EFNB2	PLOD1	2.25906e-05	16.4586	0.331	0.194	0.775513
Art.01.EFNB2	PDCD4	3.56006e-05	16.391	0.653	0.48	1
Art.01.EFNB2	RCAN1	5.67723e-05	16.3003	0.315	0.186	1
Art.01.EFNB2	AHR	5.93598e-05	15.8063	0.452	0.291	1
Art.01.EFNB2	CFH	5.2801e-30	15.6911	0.782	0.382	1.8126e-25
Art.01.EFNB2	CDH5	4.9765e-07	15.2752	0.702	0.539	0.0170838
Art.01.EFNB2	CRIP2	0.126103	14.674	0.589	0.516	1
Art.01.EFNB2	TBC1D1	1.80064e-06	14.3545	0.581	0.423	0.061814
Art.01.EFNB2	TGM2	5.91774e-07	13.4983	0.661	0.485	0.020315
Art.01.EFNB2	ARID5A	6.68525e-07	13.4755	0.306	0.154	0.0229498
Art.01.EFNB2	PTPRJ	1.01986e-13	13.3259	0.315	0.109	3.50108e-09
Art.01.EFNB2	FUT8	3.09566e-20	13.3242	0.629	0.279	1.06271e-15
Art.01.EFNB2	TAGLN2	0.84957	13.0149	0.452	0.475	1
Art.01.EFNB2	CTTNBP2NL	1.05273e-06	12.904	0.71	0.525	0.0361392
Art.01.EFNB2	DENND1A	0.723575	12.857	0.484	0.488	1
Art.01.EFNB2	COL18A1	0.00162337	12.6259	0.621	0.465	1
Art.01.EFNB2	IGF1R	5.79108e-07	12.4053	0.726	0.489	0.0198802
Art.01.EFNB2	HTRA1	0.471555	12.065	0.411	0.448	1
Art.01.EFNB2	ACACB	9.31936e-10	11.9179	0.452	0.239	3.19924e-05
Art.01.EFNB2	MMP2	0.000330402	11.8696	0.282	0.168	1
Art.01.EFNB2	PPP1R12A	0.740201	11.723	0.548	0.532	1
Art.01.EFNB2	MAP2	2.80687e-17	11.4453	0.403	0.139	9.63569e-13
Art.01.EFNB2	ECE1	0.000378837	10.8718	0.669	0.518	1
Art.01.EFNB2	ITGA9	1.10122e-10	10.6641	0.492	0.244	3.78039e-06
Art.01.EFNB2	ATP11C	0.00406001	10.6241	0.379	0.257	1
Art.01.EFNB2	MYO9A	0.540501	10.5293	0.427	0.411	1
Art.01.EFNB2	NEBL	1.98513e-08	10.5237	0.573	0.387	0.000681476
Art.01.EFNB2	JAG2	3.50449e-23	10.3539	0.597	0.235	1.20306e-18
Art.01.EFNB2	IFITM2	0.761319	10.3393	0.468	0.445	1
Art.01.EFNB2	TINAGL1	0.00108733	10.3256	0.315	0.204	1
Art.01.EFNB2	SNX9	0.00460849	10.2536	0.476	0.374	1
Art.01.EFNB2	HSD17B4	0.400243	10.015	0.266	0.244	1
Art.01.EFNB2	LAMP1	0.0140913	9.99532	0.435	0.349	1
Art.01.EFNB2	NOS1AP	7.6982e-11	9.79625	0.331	0.135	2.64272e-06
Art.01.EFNB2	CEP85L	0.0943843	9.68541	0.347	0.273	1
Art.01.EFNB2	LAMA3	1.59583e-13	9.18165	0.306	0.102	5.47832e-09
Art.01.EFNB2	CAVIN1	0.00178671	9.14643	0.484	0.382	1
Art.01.EFNB2	ITSN2	0.00014198	9.12956	0.645	0.484	1
Art.01.EFNB2	OTUD7B	0.00119183	9.06443	0.274	0.167	1
Art.01.EFNB2	DCHS1	0.0778547	9.05234	0.274	0.216	1
Art.01.EFNB2	TRAPPC9	0.00156151	9.01775	0.508	0.362	1
Art.01.EFNB2	TCN2	0.484873	8.96528	0.298	0.289	1
Art.01.EFNB2	TMEM117	0.552406	8.87993	0.282	0.249	1
Art.01.EFNB2	ATP2A3	1.00841e-67	8.41151	0.298	0.022	3.46178e-63
Art.01.EFNB2	NFE2L1	4.75521e-05	8.3682	0.339	0.196	1
Art.01.EFNB2	EGFL8	1.20519e-40	8.2962	0.694	0.204	4.1373e-36
Art.01.EFNB2	MMRN2	4.69684e-16	8.28602	0.613	0.309	1.61238e-11
Art.01.EFNB2	ADAM15	1.58521e-07	7.8862	0.476	0.29	0.00544188
Art.01.EFNB2	GFOD1	5.43579e-15	7.73895	0.782	0.478	1.86605e-10
Art.01.EFNB2	DSTN	0.386592	7.72726	0.556	0.547	1
Art.01.EFNB2	RPS6KA2	1.04933e-06	7.53277	0.677	0.536	0.0360225
Art.01.EFNB2	EXOC6B	0.00436283	7.48701	0.645	0.545	1
Art.01.EFNB2	MRTFA	0.0312627	7.36584	0.476	0.385	1
Art.01.EFNB2	SLC44A2	0.000612344	7.29046	0.419	0.305	1
Art.01.EFNB2	PALM2AKAP2	0.0108908	7.2868	0.315	0.218	1
Art.01.EFNB2	TIMP2	4.20649e-05	7.2855	0.387	0.235	1
Art.01.EFNB2	NUCB1	0.15537	7.20347	0.347	0.297	1
Art.01.EFNB2	MLLT3	0.0203214	7.09267	0.371	0.277	1
Art.01.EFNB2	PARP9	0.221959	6.97621	0.282	0.239	1
Art.01.EFNB2	MIDN	5.48425e-06	6.95449	0.492	0.315	0.188269
Art.01.EFNB2	SMAD7	2.99786e-08	6.86925	0.258	0.106	0.00102913
Art.01.EFNB2	PTMS	0.228266	6.83707	0.387	0.336	1
Art.01.EFNB2	PPIG	0.0855267	6.79815	0.282	0.365	1
Art.01.EFNB2	PRKX	4.12303e-14	6.64102	0.484	0.232	1.41539e-09
Art.01.EFNB2	SOX13	1.98637e-08	6.61126	0.331	0.156	0.000681902
Art.01.EFNB2	PCDH1	7.27094e-13	6.5946	0.516	0.242	2.49604e-08
Art.01.EFNB2	PIK3C2B	1.36555e-19	6.57496	0.621	0.279	4.68778e-15
Art.01.EFNB2	SORT1	0.521717	6.51692	0.427	0.445	1
Art.01.EFNB2	HEY1	0.000208995	6.40385	0.29	0.169	1
Art.01.EFNB2	DNAJB6	0.579051	6.40057	0.427	0.477	1
Art.01.EFNB2	JCAD	0.115632	6.31217	0.46	0.526	1
Art.01.EFNB2	PRRG1	0.447378	6.13779	0.25	0.273	1
Art.01.EFNB2	TXNRD1	0.145496	6.12662	0.29	0.238	1
Art.01.EFNB2	STOM	2.17917e-16	6.07744	0.823	0.549	7.48089e-12
Art.01.EFNB2	MRPS28	0.116028	6.05666	0.323	0.264	1
Art.01.EFNB2	TNFRSF1A	0.211688	5.96741	0.29	0.252	1
Art.01.EFNB2	KLHL20	0.389725	5.84187	0.298	0.266	1
Art.01.EFNB2	SERPINH1	0.848895	5.76937	0.411	0.406	1
Art.01.EFNB2	DNAJA1	0.0877888	5.73351	0.395	0.471	1
Art.01.EFNB2	PPA1	8.62414e-05	5.65474	0.46	0.307	1
Art.01.EFNB2	CD151	0.071079	5.56724	0.395	0.351	1
Art.01.EFNB2	ITGA8	8.97451e-06	5.54272	0.073	0.25	0.308086
Art.01.EFNB2	DENND5B	0.301431	5.50369	0.25	0.219	1
Art.01.EFNB2	LRPAP1	0.0883004	5.37538	0.258	0.203	1
Art.01.EFNB2	CNDP2	7.95546e-05	5.35012	0.355	0.209	1
Art.01.EFNB2	CSPP1	0.011256	5.28211	0.315	0.228	1
Art.01.EFNB2	ADGRG1	0.00165843	5.24257	0.395	0.287	1
Art.01.EFNB2	ITPR1	1.56189e-26	5.19389	0.468	0.143	5.36181e-22
Art.01.EFNB2	SH3GLB1	0.802974	5.18473	0.444	0.433	1
Art.01.EFNB2	EXOC2	1.70709e-06	4.87933	0.556	0.364	0.0586027
Art.01.EFNB2	PXDC1	0.12783	4.87922	0.298	0.244	1
Art.01.EFNB2	DEPP1	6.71703e-27	4.85355	0.573	0.201	2.30589e-22
Art.01.EFNB2	ABCD3	0.873708	4.8482	0.29	0.301	1
Art.01.EFNB2	CMSS1	0.370815	4.8054	0.298	0.259	1
Art.01.EFNB2	LRRC8A	0.0931826	4.76047	0.355	0.307	1
Art.01.EFNB2	MAP1LC3B	0.00121907	4.74811	0.218	0.369	1
Art.01.EFNB2	OS9	0.0252196	4.58424	0.331	0.255	1
Art.01.EFNB2	GNS	0.875562	4.5749	0.25	0.256	1
Art.01.EFNB2	TRAM2	0.0440554	4.41664	0.29	0.212	1
Art.01.EFNB2	SFT2D2	0.00356304	4.33901	0.323	0.214	1
Art.01.EFNB2	STAU2	0.0168492	4.33384	0.573	0.464	1
Art.01.EFNB2	CCSER1	0.069773	4.33236	0.25	0.194	1
Art.01.EFNB2	AGRN	0.0944893	4.31327	0.331	0.259	1
Art.01.EFNB2	AC004889.1	0.00503318	4.14703	0.25	0.164	1
Art.01.EFNB2	TOP2B	0.33349	4.14692	0.266	0.321	1
Art.01.EFNB2	ABL1	0.0428916	4.14512	0.46	0.376	1
Art.01.EFNB2	S1PR1	2.64891e-06	4.11997	0.581	0.415	0.0909346
Art.01.EFNB2	CD93	0.00514154	4.09329	0.661	0.501	1
Art.01.EFNB2	TIAM2	0.395555	4.06986	0.266	0.232	1
Art.01.EFNB2	SULF2	7.95633e-13	3.98312	0.556	0.286	2.73133e-08
Art.01.EFNB2	PPP3CC	0.681912	3.94704	0.435	0.461	1
Art.01.EFNB2	BCAM	2.92022e-06	3.92512	0.492	0.32	0.100248
Art.01.EFNB2	SYNJ2	7.93698e-49	3.8802	0.685	0.191	2.72469e-44
Art.01.EFNB2	WNT2B	1.93771e-06	3.80869	0.403	0.231	0.0665197
Art.01.EFNB2	S100A10	0.976534	3.73872	0.435	0.417	1
Art.01.EFNB2	SESN1	0.14868	3.72931	0.25	0.205	1
Art.01.EFNB2	UBE2R2	0.11926	3.72333	0.419	0.346	1
Art.01.EFNB2	FKBP9	0.846871	3.65147	0.331	0.349	1
Art.01.EFNB2	HIP1R	0.0847006	3.60018	0.298	0.244	1
Art.01.EFNB2	DHRS7B	0.00563286	3.5983	0.274	0.181	1
Art.01.EFNB2	RNF13	0.381259	3.55256	0.282	0.324	1
Art.01.EFNB2	CYB5R3	0.00012004	3.53529	0.508	0.367	1
Art.01.EFNB2	TNFRSF1B	1.12985e-06	3.49715	0.379	0.202	0.0387867
Art.01.EFNB2	TASOR2	0.196832	3.49246	0.395	0.336	1
Art.01.EFNB2	EMP2	3.40034e-06	3.46833	0.54	0.367	0.11673
Art.01.EFNB2	PELI1	7.45217e-06	3.4022	0.653	0.483	0.255825
Art.01.EFNB2	DELE1	0.436724	3.33516	0.282	0.255	1
Art.01.EFNB2	CAST	0.108182	3.27282	0.565	0.5	1
Art.01.EFNB2	ERC1	1.99983e-08	3.25532	0.782	0.531	0.000686523
Art.01.EFNB2	TMEM59	0.00485322	3.23573	0.355	0.483	1
Art.01.EFNB2	MOSMO	0.00357714	3.19361	0.419	0.307	1
Art.01.EFNB2	SCAMP1	0.0599392	3.17929	0.25	0.329	1
Art.01.EFNB2	FZD6	0.000444059	3.1404	0.427	0.294	1
Art.01.EFNB2	ARHGAP4	6.7732e-12	3.11872	0.25	0.078	2.32517e-07
Art.01.EFNB2	APOL3	9.34598e-05	3.11637	0.266	0.143	1
Art.01.EFNB2	CSDE1	0.660351	3.01122	0.427	0.445	1
Art.01.EFNB2	MAN1A2	0.193007	2.98609	0.476	0.399	1
Art.01.EFNB2	SCP2	0.684786	2.97784	0.387	0.351	1
Art.01.EFNB2	CDR2	0.109019	2.9553	0.315	0.242	1
Art.01.EFNB2	UPP1	0.0305804	2.87731	0.315	0.389	1
Art.01.EFNB2	NOD1	0.00219247	2.82797	0.46	0.326	1
Art.01.EFNB2	TM6SF1	8.70274e-05	2.82726	0.395	0.247	1
Art.01.EFNB2	ATN1	7.0659e-05	2.79066	0.315	0.18	1
Art.01.EFNB2	ABR	3.94481e-06	2.7667	0.484	0.315	0.135422
Art.01.EFNB2	CC2D2B	0.000258871	2.75383	0.403	0.262	1
Art.01.EFNB2	TRAM1	0.843928	2.67086	0.371	0.374	1
Art.01.EFNB2	MMP28	0.0728894	2.64682	0.29	0.221	1
Art.01.EFNB2	SOX18	0.0144569	2.61972	0.403	0.31	1
Art.01.EFNB2	ZNF91	0.0350473	2.61558	0.194	0.292	1
Art.01.EFNB2	MAST4	2.77209e-13	2.61528	0.823	0.537	9.5163e-09
Art.01.EFNB2	CAPN2	0.0260346	2.61424	0.379	0.297	1
Art.01.EFNB2	EFR3B	7.84334e-08	2.60232	0.331	0.159	0.00269254
Art.01.EFNB2	ARHGAP23	3.6651e-08	2.60224	0.411	0.217	0.00125819
Art.01.EFNB2	LRRC8C	0.795972	2.56942	0.476	0.468	1
Art.01.EFNB2	RUFY3	0.0241868	2.55636	0.395	0.312	1
Art.01.EFNB2	IL13RA1	0.322907	2.53342	0.331	0.293	1
Art.01.EFNB2	AIF1L	0.000706222	2.51545	0.258	0.152	1
Art.01.EFNB2	BGN	1.14128e-06	2.51239	0.347	0.185	0.0391789
Art.01.EFNB2	HNRNPM	0.823149	2.51178	0.435	0.452	1
Art.01.EFNB2	TMEM131	0.672783	2.50352	0.411	0.375	1
Art.01.EFNB2	ALPK1	2.01793e-05	2.50007	0.29	0.154	0.692737
Art.01.EFNB2	PEA15	0.0256599	2.48352	0.355	0.273	1
Art.01.EFNB2	RELL1	6.30636e-06	2.40775	0.637	0.455	0.216491
Art.01.EFNB2	FBLN2	4.4121e-27	2.39413	0.258	0.044	1.51463e-22
Art.01.EFNB2	FAM13B	0.690058	2.39038	0.331	0.323	1
Art.01.EFNB2	TCF7L1	3.57775e-13	2.37206	0.573	0.289	1.22821e-08
Art.01.EFNB2	SPTAN1	1.29975e-05	2.35762	0.613	0.458	0.446192
Art.01.EFNB2	TBC1D4	0.0213532	2.33883	0.5	0.634	1
Art.01.EFNB2	UBR4	0.550141	2.33685	0.347	0.326	1
Art.01.EFNB2	CCNYL1	0.0400577	2.32823	0.282	0.212	1
Art.01.EFNB2	ANKRD29	7.39788e-10	2.31944	0.25	0.091	2.53962e-05
Art.01.EFNB2	DNAJC13	0.986618	2.27584	0.258	0.246	1
Art.01.EFNB2	DDX24	0.276161	2.27343	0.355	0.326	1
Art.01.EFNB2	RAB3GAP2	0.819932	2.16196	0.29	0.298	1
Art.01.EFNB2	ORMDL1	0.506517	2.15016	0.298	0.331	1
Art.01.EFNB2	SDF4	0.519675	2.11294	0.274	0.25	1
Art.01.EFNB2	TAPBP	0.0115456	2.09123	0.395	0.289	1
Art.01.EFNB2	SOX17	4.89709e-06	2.0604	0.315	0.172	0.168112
Art.01.EFNB2	EHD2	4.43592e-13	2.05668	0.25	0.074	1.52281e-08
Art.01.EFNB2	ARHGAP17	6.23032e-07	2.03446	0.524	0.321	0.0213881
Art.01.EFNB2	SRSF3	0.093477	2.02874	0.411	0.475	1
Art.01.EFNB2	RAB14	0.987819	1.99393	0.29	0.305	1
Art.01.EFNB2	EPAS1	1.14577e-10	1.97786	1	0.865	3.93333e-06
Art.01.EFNB2	HSPB1	0.147188	1.96817	0.476	0.43	1
Art.01.EFNB2	MT-ND6	8.44319e-07	1.96816	0.403	0.218	0.0289846
Art.01.EFNB2	ABLIM3	0.176811	1.96537	0.355	0.3	1
Art.01.EFNB2	FBXO11	0.219931	1.94887	0.508	0.454	1
Art.01.EFNB2	EIF2AK4	0.521364	1.93713	0.274	0.255	1
Art.01.EFNB2	SCAPER	0.195035	1.92609	0.419	0.365	1
Art.01.EFNB2	IGFBP2	2.28435e-14	1.91981	0.29	0.09	7.84195e-10
Art.01.EFNB2	CALU	0.00818373	1.90103	0.427	0.323	1
Art.01.EFNB2	TPM3	0.75669	1.89053	0.548	0.581	1
Art.01.EFNB2	IPO7	0.436008	1.89025	0.29	0.266	1
Art.01.EFNB2	GJA4	2.80543e-38	1.86897	0.339	0.054	9.63076e-34
Art.01.EFNB2	SDCBP	0.429242	1.83065	0.452	0.439	1
Art.01.EFNB2	LAPTM4A	0.0224181	1.8304	0.435	0.518	1
Art.01.EFNB2	UBAP1	0.0236948	1.80621	0.306	0.224	1
Art.01.EFNB2	DMXL1	0.389816	1.80527	0.323	0.3	1
Art.01.EFNB2	PROS1	0.0527686	1.79954	0.331	0.268	1
Art.01.EFNB2	SEPTIN7	0.021512	1.7934	0.46	0.59	1
Art.01.EFNB2	SMAP2	0.100985	1.78835	0.266	0.212	1
Art.01.EFNB2	PUM3	0.162898	1.78795	0.29	0.239	1
Art.01.EFNB2	TEAD4	0.0993822	1.78596	0.315	0.255	1
Art.01.EFNB2	CHIC2	0.835706	1.78141	0.403	0.399	1
Art.01.EFNB2	KAT6B	0.567778	1.77337	0.29	0.311	1
Art.01.EFNB2	CSNK1G3	0.930148	1.77029	0.355	0.36	1
Art.01.EFNB2	SPEN	2.34546e-05	1.76346	0.492	0.317	0.805174
Art.01.EFNB2	PHC3	0.93573	1.73339	0.331	0.341	1
Art.01.EFNB2	RIPOR1	0.00079883	1.72665	0.315	0.199	1
Art.01.EFNB2	CAPN7	0.74375	1.72138	0.258	0.258	1
Art.01.EFNB2	STXBP1	0.0844689	1.71254	0.306	0.243	1
Art.01.EFNB2	SSR2	0.618419	1.70325	0.282	0.311	1
Art.01.EFNB2	IKBKB	0.00497849	1.68793	0.46	0.355	1
Art.01.EFNB2	TLK1	0.0204333	1.66282	0.476	0.372	1
Art.01.EFNB2	RASA2	0.274736	1.65006	0.411	0.362	1
Art.01.EFNB2	USP15	0.358874	1.62997	0.435	0.46	1
Art.01.EFNB2	NUFIP2	0.808538	1.62194	0.403	0.384	1
Art.01.EFNB2	MTR	0.0152817	1.62053	0.371	0.27	1
Art.01.EFNB2	NPTN	2.63585e-06	1.61456	0.54	0.354	0.0904861
Art.01.EFNB2	MKNK2	0.000438542	1.60953	0.323	0.203	1
Art.01.EFNB2	TMEM165	0.650458	1.59959	0.5	0.493	1
Art.01.EFNB2	UBE2D3	0.350138	1.57884	0.653	0.635	1
Art.01.EFNB2	SET	0.303063	1.55319	0.411	0.354	1
Art.01.EFNB2	FURIN	8.04716e-05	1.5113	0.274	0.151	1
Art.01.EFNB2	DCTN1	0.0131295	1.50177	0.25	0.169	1
Art.01.EFNB2	SAMD4B	0.0434463	1.49639	0.266	0.19	1
Art.01.EFNB2	ZYX	0.0183044	1.47034	0.266	0.185	1
Art.01.EFNB2	CYTH3	1.19847e-09	1.46792	0.524	0.291	4.11421e-05
Art.01.EFNB2	PRKAR2A	0.23866	1.45889	0.274	0.228	1
Art.01.EFNB2	LRRC32	6.44303e-14	1.45543	0.419	0.168	2.21183e-09
Art.01.EFNB2	RBX1	0.564532	1.44763	0.339	0.354	1
Art.01.EFNB2	CX3CL1	0.180275	1.44022	0.25	0.207	1
Art.01.EFNB2	AZIN1	0.000991088	1.43642	0.306	0.196	1
Art.01.EFNB2	DHRS3	0.0855963	1.42887	0.363	0.305	1
Art.01.EFNB2	SELENON	1.93649e-05	1.41477	0.339	0.189	0.664778
Art.01.EFNB2	CHM	0.13841	1.4114	0.258	0.321	1
Art.01.EFNB2	CDC42EP3	0.00652029	1.39254	0.411	0.297	1
Art.01.EFNB2	PML	0.351446	1.38931	0.29	0.255	1
Art.01.EFNB2	IGFBP3	1.9488e-12	1.38416	0.702	0.443	6.69004e-08
Art.01.EFNB2	PRRC2C	0.920211	1.38217	0.597	0.574	1
Art.01.EFNB2	SMC6	0.000711674	1.37189	0.355	0.225	1
Art.01.EFNB2	RASIP1	0.0315985	1.36524	0.411	0.335	1
Art.01.EFNB2	TRIM38	0.907068	1.3423	0.25	0.248	1
Art.01.EFNB2	ARPC5L	0.749337	1.33709	0.25	0.248	1
Art.01.EFNB2	CDC73	0.206835	1.33185	0.411	0.363	1
Art.01.EFNB2	ANGEL1	0.000429485	1.32659	0.315	0.191	1
Art.01.EFNB2	SERINC3	0.175497	1.29886	0.411	0.365	1
Art.01.EFNB2	TOM1L2	0.030931	1.26948	0.282	0.2	1
Art.01.EFNB2	IREB2	0.215829	1.24673	0.202	0.253	1
Art.01.EFNB2	VAMP2	0.050329	1.22936	0.177	0.258	1
Art.01.EFNB2	LSS	0.630849	1.2261	0.258	0.27	1
Art.01.EFNB2	LTBP4	7.82285e-59	1.22353	0.25	0.018	2.68551e-54
Art.01.EFNB2	ILK	0.415097	1.22216	0.226	0.266	1
Art.01.EFNB2	ANXA5	0.20237	1.21942	0.444	0.401	1
Art.01.EFNB2	FAM89A	0.00455008	1.21786	0.323	0.212	1
Art.01.EFNB2	PHF10	0.0285198	1.19511	0.298	0.227	1
Art.01.EFNB2	REV1	0.867766	1.19377	0.282	0.279	1
Art.01.EFNB2	STIM1	9.78345e-06	1.15805	0.315	0.171	0.335856
Art.01.EFNB2	STX12	0.190111	1.14916	0.468	0.454	1
Art.01.EFNB2	YME1L1	0.25849	1.1197	0.29	0.339	1
Art.01.EFNB2	ACYP2	0.0971283	1.11322	0.323	0.261	1
Art.01.EFNB2	TGFB1	0.624961	1.11024	0.274	0.266	1
Art.01.EFNB2	LAMB2	6.93223e-05	1.10191	0.411	0.259	1
Art.01.EFNB2	POLR2A	0.285258	1.10037	0.339	0.293	1
Art.01.EFNB2	TMEM43	7.68208e-08	1.09789	0.282	0.126	0.00263718
Art.01.EFNB2	UGGT1	0.186769	1.0758	0.266	0.215	1
Art.01.EFNB2	SECISBP2	0.552917	1.07322	0.387	0.357	1
Art.01.EFNB2	GIMAP4	0.132572	1.05777	0.274	0.337	1
Art.01.EFNB2	FLT4	0.737979	1.03244	0.331	0.305	1
Art.01.EFNB2	CFDP1	0.0204544	1.03057	0.46	0.362	1
Art.01.EFNB2	MBD2	0.000490706	1.02969	0.435	0.299	1
Art.01.EFNB2	SNX1	0.393113	1.02614	0.274	0.246	1
Art.01.EFNB2	TXNDC5	2.77718e-06	1.01966	0.274	0.136	0.095338
Art.01.EFNB2	SHE	2.7964e-11	1.0087	0.468	0.227	9.59976e-07
Art.01.EFNB2	EP300	0.943207	1.00152	0.298	0.3	1
Art.01.EFNB2	PPP1R10	0.168405	0.987386	0.387	0.339	1
Art.01.EFNB2	RCN1	8.25479e-06	0.978048	0.323	0.172	0.283379
Art.01.EFNB2	PRKAR1A	0.936883	0.976123	0.323	0.333	1
Art.01.EFNB2	GAS5	0.0865379	0.973614	0.282	0.348	1
Art.01.EFNB2	CFI	0.0126136	0.972308	0.395	0.295	1
Art.01.EFNB2	KDELR1	0.60898	0.967973	0.298	0.279	1
Art.01.EFNB2	SNX19	0.479958	0.960801	0.25	0.222	1
Art.01.EFNB2	KDM3A	0.0513749	0.957042	0.306	0.235	1
Art.01.EFNB2	MALT1	0.085014	0.955898	0.29	0.236	1
Art.01.EFNB2	PARVA	0.0925427	0.945428	0.323	0.254	1
Art.01.EFNB2	TRA2A	0.722634	0.943339	0.5	0.471	1
Art.01.EFNB2	CSRNP1	9.38118e-06	0.936107	0.323	0.178	0.322047
Art.01.EFNB2	WIPF2	0.00688502	0.935757	0.274	0.181	1
Art.01.EFNB2	MYO1C	8.43328e-05	0.933645	0.29	0.163	1
Art.01.EFNB2	PPP1R13B	0.0783311	0.927873	0.387	0.452	1
Art.01.EFNB2	TRAPPC8	0.0271192	0.909726	0.363	0.268	1
Art.01.EFNB2	PTP4A3	0.0337304	0.901308	0.355	0.271	1
Art.01.EFNB2	NUP160	0.0066329	0.896652	0.25	0.158	1
Art.01.EFNB2	LMO2	0.431453	0.895118	0.508	0.483	1
Art.01.EFNB2	RNH1	0.0398264	0.888802	0.274	0.203	1
Art.01.EFNB2	MAGT1	0.351487	0.888347	0.29	0.253	1
Art.01.EFNB2	PKN3	4.15321e-10	0.884405	0.371	0.167	1.42576e-05
Art.01.EFNB2	ARHGEF2	0.00443554	0.878731	0.274	0.179	1
Art.01.EFNB2	CYB5B	0.002208	0.866955	0.339	0.229	1
Art.01.EFNB2	IL3RA	3.37848e-07	0.857267	0.435	0.267	0.011598
Art.01.EFNB2	NDFIP1	0.650598	0.856478	0.355	0.374	1
Art.01.EFNB2	SLC26A2	0.00924472	0.84919	0.323	0.235	1
Art.01.EFNB2	TLN2	5.78197e-12	0.825396	0.282	0.095	1.98489e-07
Art.01.EFNB2	F11R	0.000860275	0.82424	0.29	0.186	1
Art.01.EFNB2	RALY	0.474316	0.816891	0.379	0.371	1
Art.01.EFNB2	STX8	0.901184	0.807578	0.347	0.364	1
Art.01.EFNB2	PIGN	0.0547427	0.806912	0.25	0.189	1
Art.01.EFNB2	PSMB1	0.0420317	0.797352	0.315	0.399	1
Art.01.EFNB2	RNF130	0.134326	0.794309	0.387	0.326	1
Art.01.EFNB2	YWHAG	0.0615714	0.79151	0.387	0.309	1
Art.01.EFNB2	FDPS	0.385226	0.790321	0.315	0.347	1
Art.01.EFNB2	PSEN1	0.0415738	0.788263	0.306	0.227	1
Art.01.EFNB2	CMPK1	0.81212	0.781346	0.323	0.312	1
Art.01.EFNB2	TMBIM6	0.0100313	0.77826	0.435	0.554	1
Art.01.EFNB2	SPATS2	0.049406	0.775867	0.29	0.375	1
Art.01.EFNB2	TAP1	0.000162546	0.772508	0.298	0.172	1
Art.01.EFNB2	EIF4A1	0.407465	0.760537	0.532	0.481	1
Art.01.EFNB2	RAPGEF3	0.0992406	0.751955	0.282	0.229	1
Art.01.EFNB2	SELENOF	0.0295428	0.744665	0.218	0.309	1
Art.01.EFNB2	MDM4	0.0880682	0.741052	0.387	0.327	1
Art.01.EFNB2	CRK	7.40256e-06	0.738778	0.516	0.336	0.254122
Art.01.EFNB2	RNF10	0.0624704	0.737341	0.274	0.213	1
Art.01.EFNB2	PJA2	0.0380541	0.730314	0.444	0.349	1
Art.01.EFNB2	MAP2K4	0.144843	0.730303	0.242	0.297	1
Art.01.EFNB2	ARL6IP5	0.000823161	0.728399	0.331	0.212	1
Art.01.EFNB2	SEMA6B	0.00011412	0.717194	0.395	0.25	1
Art.01.EFNB2	SLC16A14	0.000527702	0.697485	0.282	0.171	1
Art.01.EFNB2	TNRC6C	0.000937957	0.695255	0.274	0.167	1
Art.01.EFNB2	CTSZ	0.196333	0.68273	0.266	0.225	1
Art.01.EFNB2	ADGRA2	0.00179402	0.680324	0.298	0.196	1
Art.01.EFNB2	VSIR	0.0326748	0.673133	0.315	0.244	1
Art.01.EFNB2	ITCH	0.540829	0.669035	0.371	0.408	1
Art.01.EFNB2	FBH1	0.133895	0.657785	0.29	0.24	1
Art.01.EFNB2	ECI2	0.646754	0.65393	0.258	0.247	1
Art.01.EFNB2	TMEM109	0.00185957	0.652478	0.306	0.202	1
Art.01.EFNB2	KLC1	0.644611	0.641631	0.492	0.478	1
Art.01.EFNB2	SLC5A4	0.002705	0.628599	0.379	0.254	1
Art.01.EFNB2	PCGF2	0.0406928	0.625793	0.258	0.192	1
Art.01.EFNB2	CLSTN1	0.014231	0.62185	0.403	0.312	1
Art.01.EFNB2	CCDC47	0.908433	0.618264	0.242	0.253	1
Art.01.EFNB2	NOL10	0.514077	0.615597	0.282	0.245	1
Art.01.EFNB2	ADD1	3.03565e-12	0.595678	0.79	0.558	1.04211e-07
Art.01.EFNB2	PHF11	0.0719786	0.592719	0.25	0.187	1
Art.01.EFNB2	MAPK1IP1L	0.826382	0.589191	0.298	0.283	1
Art.01.EFNB2	FOXN2	0.000117288	0.579084	0.347	0.204	1
Art.01.EFNB2	HNRNPA3	0.701966	0.578531	0.556	0.558	1
Art.01.EFNB2	KLF9	0.00371978	0.575858	0.548	0.431	1
Art.01.EFNB2	SAFB	0.00838456	0.568891	0.347	0.237	1
Art.01.EFNB2	RAB21	0.0726771	0.568402	0.331	0.265	1
Art.01.EFNB2	CYB5A	0.227152	0.568337	0.282	0.237	1
Art.01.EFNB2	MXD4	0.0253969	0.567058	0.435	0.343	1
Art.01.EFNB2	MYEF2	0.001276	0.559449	0.306	0.199	1
Art.01.EFNB2	DDX46	0.804771	0.557867	0.379	0.35	1
Art.01.EFNB2	LPGAT1	0.0366453	0.556318	0.315	0.231	1
Art.01.EFNB2	DBNL	0.00547365	0.549477	0.306	0.209	1
Art.01.EFNB2	PSMC6	0.511798	0.541243	0.234	0.275	1
Art.01.EFNB2	ARRB1	0.0273534	0.532126	0.25	0.173	1
Art.01.EFNB2	TM2D1	0.00980925	0.530324	0.363	0.264	1
Art.01.EFNB2	MGAT1	0.0567821	0.526369	0.371	0.303	1
Art.01.EFNB2	GLUL	6.6721e-17	0.52595	0.468	0.192	2.29046e-12
Art.01.EFNB2	EXOC6	2.39833e-15	0.525476	0.621	0.339	8.23322e-11
Art.01.EFNB2	GBE1	0.594091	0.525416	0.371	0.354	1
Art.01.EFNB2	ATP6AP2	0.069059	0.525219	0.282	0.215	1
Art.01.EFNB2	NEDD4L	0.406646	0.52517	0.298	0.272	1
Art.01.EFNB2	PACS2	0.285782	0.525048	0.258	0.224	1
Art.01.EFNB2	SUN1	2.3763e-05	0.522085	0.411	0.258	0.815762
Art.01.EFNB2	CDKN1A	0.00148382	0.518854	0.347	0.232	1
Art.01.EFNB2	CCAR1	0.86763	0.507681	0.371	0.358	1
Art.01.EFNB2	VPS39	0.162108	0.505477	0.258	0.218	1
Art.01.EFNB2	BRD2	0.0697791	0.504968	0.347	0.273	1
Art.01.EFNB2	OAZ1	0.00848753	0.504568	0.355	0.473	1
Art.01.EFNB2	BRI3	0.46212	0.499123	0.452	0.423	1
Art.01.EFNB2	EIF3B	0.0305808	0.49082	0.258	0.19	1
Art.01.EFNB2	TGOLN2	0.455317	0.489849	0.395	0.364	1
Art.01.EFNB2	TMEM245	0.174873	0.48651	0.339	0.295	1
Art.01.EFNB2	RAP2A	0.27222	0.479797	0.258	0.319	1
Art.01.EFNB2	ATF6B	0.00202713	0.477554	0.274	0.175	1
Art.01.EFNB2	TRAPPC12	0.487192	0.477312	0.218	0.253	1
Art.01.EFNB2	SBNO1	0.0617891	0.474867	0.274	0.208	1
Art.01.EFNB2	CDS2	0.892754	0.468129	0.274	0.274	1
Art.01.EFNB2	NR2C2	0.243328	0.466339	0.258	0.295	1
Art.01.EFNB2	NBEAL2	2.40493e-07	0.454873	0.355	0.178	0.0082559
Art.01.EFNB2	MBTPS1	0.583429	0.453973	0.298	0.283	1
Art.01.EFNB2	ATP5F1C	0.877883	0.453848	0.331	0.324	1
Art.01.EFNB2	TCF7L2	0.00470661	0.453197	0.548	0.432	1
Art.01.EFNB2	ELK4	0.156315	0.446517	0.282	0.233	1
Art.01.EFNB2	MLLT6	0.000236876	0.445879	0.323	0.19	1
Art.01.EFNB2	SUN2	0.00152167	0.44497	0.29	0.184	1
Art.01.EFNB2	LRRFIP2	0.018236	0.432047	0.476	0.375	1
Art.01.EFNB2	DCAF8	0.0688496	0.419661	0.355	0.281	1
Art.01.EFNB2	NPEPPS	0.497948	0.417337	0.355	0.324	1
Art.01.EFNB2	CSNK1E	0.514957	0.417053	0.282	0.253	1
Art.01.EFNB2	GSTK1	0.356076	0.416698	0.258	0.226	1
Art.01.EFNB2	PLEC	0.00332299	0.413912	0.395	0.29	1
Art.01.EFNB2	SP110	1.40204e-05	0.412988	0.29	0.149	0.481308
Art.01.EFNB2	UBE2V1	0.347332	0.412489	0.306	0.271	1
Art.01.EFNB2	APPL1	0.522346	0.401041	0.266	0.246	1
Art.01.EFNB2	HLA-E	0.331895	0.399125	0.742	0.784	1
Art.01.EFNB2	CMTM6	0.245837	0.397123	0.274	0.23	1
Art.01.EFNB2	LARP4	0.222155	0.390285	0.331	0.271	1
Art.01.EFNB2	PPP1R21	0.00224118	0.384506	0.282	0.175	1
Art.01.EFNB2	AMFR	0.0383522	0.381248	0.25	0.18	1
Art.01.EFNB2	XPO7	0.365528	0.380534	0.274	0.235	1
Art.01.EFNB2	NPC1	0.0339947	0.376235	0.25	0.183	1
Art.01.EFNB2	SLCO4A1	1.4961e-13	0.371184	0.395	0.157	5.13598e-09
Art.01.EFNB2	MICU1	0.303068	0.370469	0.298	0.259	1
Art.01.EFNB2	ARFGAP3	0.475996	0.369168	0.274	0.26	1
Art.01.EFNB2	OSBPL9	0.713108	0.362319	0.355	0.369	1
Art.01.EFNB2	SRSF2	0.709178	0.361724	0.363	0.362	1
Art.01.EFNB2	MTREX	0.52059	0.360727	0.315	0.282	1
Art.01.EFNB2	COLGALT1	0.216523	0.352219	0.29	0.24	1
Art.01.EFNB2	SKI	0.0206377	0.350358	0.387	0.309	1
Art.01.EFNB2	DGLUCY	0.00014109	0.349706	0.419	0.274	1
Art.01.EFNB2	LMAN2	0.144139	0.348955	0.29	0.239	1
Art.01.EFNB2	CHCHD3	0.0933408	0.347598	0.298	0.368	1
Art.01.EFNB2	FXYD5	0.110497	0.321272	0.29	0.376	1
Art.01.EFNB2	LARP1	0.0176873	0.318172	0.323	0.239	1
Art.01.EFNB2	DCP2	0.136079	0.317756	0.21	0.284	1
Art.01.EFNB2	UPF3A	0.347378	0.306691	0.419	0.384	1
Art.01.EFNB2	GALNT2	0.00981908	0.302591	0.315	0.218	1
Art.01.EFNB2	SEC23A	0.468639	0.300857	0.306	0.285	1
Art.01.EFNB2	FBXW8	0.00915158	0.300068	0.274	0.178	1
Art.01.EFNB2	NBR1	0.000193362	0.29546	0.315	0.181	1
Art.01.EFNB2	TMEM259	0.0120755	0.28769	0.331	0.243	1
Art.01.EFNB2	FGFR1OP2	0.0274214	0.280364	0.21	0.308	1
Art.01.EFNB2	SUPT6H	0.327719	0.280238	0.298	0.259	1
Art.01.EFNB2	GPD2	0.0193122	0.278896	0.25	0.172	1
Art.01.EFNB2	ERP44	0.364743	0.274148	0.347	0.315	1
Art.01.EFNB2	CRLF3	9.37225e-05	0.272788	0.25	0.127	1
Art.01.EFNB2	RCOR3	0.621411	0.272506	0.266	0.281	1
Art.01.EFNB2	HNRNPL	0.00200633	0.264312	0.331	0.216	1
Art.01.EFNB2	RILPL2	0.00136549	0.263993	0.355	0.241	1
Art.01.EFNB2	LONRF1	0.00148541	0.262655	0.274	0.166	1
Art.01.EFNB2	SIGIRR	0.0119697	0.259351	0.274	0.189	1
Art.01.EFNB2	TNKS1BP1	0.0437709	0.250409	0.258	0.189	1
Ven.01.TSHZ2	FLT1	4.85731e-130	428.57	0.91	0.812	1.66747e-125
Ven.01.TSHZ2	MTRNR2L12	1.01114e-234	428.569	0.499	0.026	3.47114e-230
Ven.01.TSHZ2	NEAT1	1.20285e-264	363.649	0.97	0.829	4.12926e-260
Ven.01.TSHZ2	TCF4	1.65388e-268	261.118	0.963	0.813	5.67759e-264
Ven.01.TSHZ2	ESM1	1.09759e-48	251.118	0.314	0.121	3.76791e-44
Ven.01.TSHZ2	GRB10	0	212.166	0.924	0.536	0
Ven.01.TSHZ2	ARHGEF7	1.25733e-188	207.435	0.745	0.347	4.31629e-184
Ven.01.TSHZ2	MCTP1	1.90679e-162	200.623	0.61	0.194	6.54581e-158
Ven.01.TSHZ2	CALCRL	1.14006e-251	199.182	0.859	0.546	3.91372e-247
Ven.01.TSHZ2	RCAN2	1.59563e-148	197.662	0.424	0.07	5.47765e-144
Ven.01.TSHZ2	CBLB	6.65321e-279	196.549	0.737	0.225	2.28398e-274
Ven.01.TSHZ2	RORA	1.59785e-53	191.46	0.649	0.447	5.48527e-49
Ven.01.TSHZ2	CDH13	3.82721e-125	190.434	0.4	0.085	1.31384e-120
Ven.01.TSHZ2	PLPP3	1.64796e-168	184.221	0.598	0.202	5.65727e-164
Ven.01.TSHZ2	RAPGEF4	8.97685e-230	181.868	0.837	0.44	3.08166e-225
Ven.01.TSHZ2	PDE4D	1.09874e-285	179.542	0.879	0.473	3.77188e-281
Ven.01.TSHZ2	A2M	0.000577064	177.541	0.849	0.901	1
Ven.01.TSHZ2	LHFPL6	4.33362e-10	169.301	0.743	0.635	1.48769e-05
Ven.01.TSHZ2	NOX4	1.09719e-296	168.248	0.688	0.122	3.76656e-292
Ven.01.TSHZ2	CACNA1C	0	164.557	0.722	0.107	0
Ven.01.TSHZ2	KCNQ3	1.20988e-117	164.553	0.347	0.055	4.15339e-113
Ven.01.TSHZ2	PTPRE	1.43034e-254	152.32	0.708	0.195	4.91022e-250
Ven.01.TSHZ2	ANO2	2.71032e-306	151.569	0.844	0.348	9.30426e-302
Ven.01.TSHZ2	GALNT18	2.54741e-280	150.13	0.913	0.599	8.74499e-276
Ven.01.TSHZ2	ADGRL2	5.23871e-220	149.681	0.861	0.547	1.7984e-215
Ven.01.TSHZ2	CDH11	2.71653e-29	147.224	0.37	0.229	9.32557e-25
Ven.01.TSHZ2	DOCK4	0	146.696	0.913	0.436	0
Ven.01.TSHZ2	ARHGAP24	3.5476e-69	140.03	0.308	0.088	1.21786e-64
Ven.01.TSHZ2	PDGFD	3.96382e-209	140.005	0.535	0.091	1.36074e-204
Ven.01.TSHZ2	ADGRL4	3.50863e-206	139.814	0.904	0.712	1.20448e-201
Ven.01.TSHZ2	MIR31HG	1.87909e-148	139.128	0.313	0.004	6.45072e-144
Ven.01.TSHZ2	PTPRM	6.5743e-291	138.594	0.94	0.663	2.25689e-286
Ven.01.TSHZ2	ARHGAP26	1.93282e-98	138.588	0.77	0.497	6.63519e-94
Ven.01.TSHZ2	TSHZ2	2.01894e-231	138.405	0.731	0.264	6.93081e-227
Ven.01.TSHZ2	ADAMTS9	8.71139e-203	136.138	0.677	0.229	2.99053e-198
Ven.01.TSHZ2	SNTG2	2.58599e-103	135.602	0.316	0.047	8.87743e-99
Ven.01.TSHZ2	PIK3R3	2.51646e-211	133.67	0.823	0.447	8.63876e-207
Ven.01.TSHZ2	FYN	3.38995e-246	132.958	0.861	0.513	1.16374e-241
Ven.01.TSHZ2	ABCB1	3.76243e-39	132.817	0.862	0.732	1.2916e-34
Ven.01.TSHZ2	LDB2	0	129.862	0.87	0.397	0
Ven.01.TSHZ2	NRP1	1.86448e-241	129.82	0.844	0.485	6.40057e-237
Ven.01.TSHZ2	HECW2	0	128.517	0.78	0.256	0
Ven.01.TSHZ2	SPRED1	1.85571e-228	128.293	0.639	0.163	6.37046e-224
Ven.01.TSHZ2	NAMPT	0.264	125.486	0.598	0.615	1
Ven.01.TSHZ2	PALM2-AKAP2	3.37613e-236	122.644	0.486	0.018	1.15899e-231
Ven.01.TSHZ2	ITGA1	9.06779e-190	119.434	0.82	0.532	3.11288e-185
Ven.01.TSHZ2	NAV2	8.06727e-94	118.395	0.563	0.268	2.76941e-89
Ven.01.TSHZ2	FNDC3B	1.42211e-243	118.005	0.802	0.391	4.88195e-239
Ven.01.TSHZ2	KIAA1217	2.50195e-270	117.011	0.65	0.121	8.58895e-266
Ven.01.TSHZ2	ZNF521	7.31631e-235	115.517	0.673	0.187	2.51161e-230
Ven.01.TSHZ2	EMCN	2.74711e-97	115.505	0.762	0.554	9.43055e-93
Ven.01.TSHZ2	CALD1	6.1703e-67	115.3	0.704	0.498	2.1182e-62
Ven.01.TSHZ2	CEMIP2	3.75379e-127	114.062	0.789	0.514	1.28864e-122
Ven.01.TSHZ2	THBS1	6.70467e-86	113.226	0.332	0.078	2.30165e-81
Ven.01.TSHZ2	PLPP1	2.6007e-144	112.62	0.821	0.604	8.92793e-140
Ven.01.TSHZ2	AL356124.1	4.41519e-201	112.594	0.412	0.009	1.51569e-196
Ven.01.TSHZ2	DOCK9	8.869e-189	111.177	0.945	0.751	3.04464e-184
Ven.01.TSHZ2	MYO1B	5.60078e-243	110.618	0.769	0.321	1.92269e-238
Ven.01.TSHZ2	PLCB1	0	110.432	0.889	0.368	0
Ven.01.TSHZ2	RALGAPA2	2.66229e-227	110.42	0.709	0.226	9.13936e-223
Ven.01.TSHZ2	INSR	7.4734e-248	109.846	0.889	0.624	2.56554e-243
Ven.01.TSHZ2	PTPRK	1.2521e-247	109.734	0.841	0.495	4.29832e-243
Ven.01.TSHZ2	ZEB1	0	109.271	0.898	0.475	0
Ven.01.TSHZ2	FBXL7	0	109.136	0.819	0.273	0
Ven.01.TSHZ2	SYT1	6.78173e-56	108.282	0.258	0.072	2.3281e-51
Ven.01.TSHZ2	NFIA	9.249e-108	106.826	0.776	0.545	3.17509e-103
Ven.01.TSHZ2	PTCHD4	2.55567e-152	106.296	0.446	0.078	8.77338e-148
Ven.01.TSHZ2	SNTB1	6.49172e-248	106.289	0.578	0.076	2.22854e-243
Ven.01.TSHZ2	DDX60L	1.09292e-83	106.006	0.526	0.238	3.75188e-79
Ven.01.TSHZ2	RAI14	8.13427e-284	104.843	0.771	0.244	2.79241e-279
Ven.01.TSHZ2	NCOA7	5.38602e-46	104.593	0.54	0.35	1.84897e-41
Ven.01.TSHZ2	COL4A2	4.01944e-246	103.77	0.855	0.454	1.37983e-241
Ven.01.TSHZ2	HSPG2	1.49617e-254	101.85	0.878	0.468	5.1362e-250
Ven.01.TSHZ2	NDRG1	7.25867e-21	99.6077	0.316	0.186	2.49183e-16
Ven.01.TSHZ2	MRTFB	8.3804e-196	99.5557	0.864	0.557	2.87691e-191
Ven.01.TSHZ2	PITPNC1	0	99.4865	0.821	0.288	0
Ven.01.TSHZ2	ADAMTS6	2.30947e-99	98.9763	0.478	0.167	7.92817e-95
Ven.01.TSHZ2	FOLH1	5.79921e-113	98.9382	0.357	0.062	1.99081e-108
Ven.01.TSHZ2	CADPS2	4.53587e-269	98.1928	0.87	0.483	1.55712e-264
Ven.01.TSHZ2	PCDH17	1.94077e-181	97.9953	0.598	0.164	6.66247e-177
Ven.01.TSHZ2	CDC14A	1.35619e-77	97.4878	0.55	0.279	4.65567e-73
Ven.01.TSHZ2	AKAP12	7.43295e-15	95.3072	0.154	0.259	2.55166e-10
Ven.01.TSHZ2	FAM155A	1.86533e-254	95.3058	0.514	0.018	6.40349e-250
Ven.01.TSHZ2	FBXW7	3.66175e-146	95.2617	0.632	0.256	1.25704e-141
Ven.01.TSHZ2	CRIM1	1.88291e-18	95.247	0.651	0.564	6.46383e-14
Ven.01.TSHZ2	CNKSR3	7.16562e-59	94.8206	0.48	0.255	2.45988e-54
Ven.01.TSHZ2	HIVEP1	4.52523e-76	93.6293	0.463	0.201	1.55347e-71
Ven.01.TSHZ2	MYO1E	2.72243e-248	93.2568	0.834	0.371	9.34585e-244
Ven.01.TSHZ2	SHROOM4	1.07592e-228	92.4219	0.761	0.323	3.69352e-224
Ven.01.TSHZ2	IVNS1ABP	1.06467e-189	88.9746	0.742	0.372	3.65491e-185
Ven.01.TSHZ2	BAZ2B	9.44647e-206	88.4919	0.828	0.465	3.24288e-201
Ven.01.TSHZ2	PDLIM5	9.05373e-79	88.0937	0.586	0.337	3.10805e-74
Ven.01.TSHZ2	HSPH1	3.49806e-36	87.6274	0.326	0.514	1.20085e-31
Ven.01.TSHZ2	ST6GALNAC3	3.54353e-233	87.0939	0.95	0.684	1.21646e-228
Ven.01.TSHZ2	VMP1	3.21091e-62	86.8036	0.585	0.356	1.10227e-57
Ven.01.TSHZ2	FBN1	9.00269e-111	86.468	0.389	0.078	3.09053e-106
Ven.01.TSHZ2	GNAQ	6.67581e-184	85.4688	0.851	0.543	2.29174e-179
Ven.01.TSHZ2	NR5A2	6.32648e-305	84.606	0.647	0.071	2.17182e-300
Ven.01.TSHZ2	ADAMTS5	3.88632e-105	84.5233	0.358	0.07	1.33414e-100
Ven.01.TSHZ2	MAML3	4.5209e-212	83.9	0.747	0.315	1.55198e-207
Ven.01.TSHZ2	LAMA4	1.63366e-183	83.7642	0.725	0.348	5.60818e-179
Ven.01.TSHZ2	PDE7B	5.09116e-235	83.6699	0.594	0.101	1.74774e-230
Ven.01.TSHZ2	DACH1	1.14261e-08	83.4003	0.43	0.367	0.000392246
Ven.01.TSHZ2	RAPGEF5	6.64165e-250	82.4348	0.785	0.325	2.28001e-245
Ven.01.TSHZ2	IL6ST	1.95245e-79	82.3591	0.827	0.665	6.70258e-75
Ven.01.TSHZ2	WWTR1	4.00468e-143	82.3231	0.835	0.607	1.37477e-138
Ven.01.TSHZ2	SORBS2	0.000753939	82.3213	0.639	0.62	1
Ven.01.TSHZ2	CDH2	0.18877	80.8804	0.329	0.34	1
Ven.01.TSHZ2	RASAL2	5.48099e-247	80.8799	0.882	0.544	1.88157e-242
Ven.01.TSHZ2	NRIP1	6.58924e-210	80.7232	0.662	0.206	2.26202e-205
Ven.01.TSHZ2	RBMS3	2.01682e-240	78.7585	0.923	0.622	6.92356e-236
Ven.01.TSHZ2	RAPGEF2	7.14978e-193	78.0842	0.873	0.537	2.45445e-188
Ven.01.TSHZ2	MAOA	0.000234642	78.0677	0.235	0.291	1
Ven.01.TSHZ2	HERC2	6.00039e-194	76.8519	0.732	0.309	2.05988e-189
Ven.01.TSHZ2	SLCO2A1	5.03377e-129	75.5883	0.583	0.231	1.72804e-124
Ven.01.TSHZ2	PLCB4	1.18216e-33	75.1096	0.582	0.412	4.05825e-29
Ven.01.TSHZ2	RIMKLB	1.65948e-34	75.0395	0.528	0.33	5.69683e-30
Ven.01.TSHZ2	PLEKHG1	3.92672e-232	74.6824	0.927	0.624	1.348e-227
Ven.01.TSHZ2	SORBS1	9.27102e-49	74.048	0.651	0.442	3.18265e-44
Ven.01.TSHZ2	ABLIM1	1.29105e-19	74.0199	0.667	0.581	4.43203e-15
Ven.01.TSHZ2	LAMC1	7.73273e-153	73.6669	0.681	0.284	2.65457e-148
Ven.01.TSHZ2	EPB41L4A	2.15929e-301	73.6669	0.822	0.313	7.41263e-297
Ven.01.TSHZ2	NEDD9	2.07537e-122	72.861	0.795	0.532	7.12454e-118
Ven.01.TSHZ2	LAMB1	2.26091e-281	72.7248	0.708	0.163	7.76147e-277
Ven.01.TSHZ2	AFF3	1.29606e-46	72.4105	0.098	0.284	4.44924e-42
Ven.01.TSHZ2	HMCN1	1.65773e-100	72.0038	0.543	0.235	5.69083e-96
Ven.01.TSHZ2	ELOVL7	1.2918e-09	71.4286	0.349	0.479	4.43463e-05
Ven.01.TSHZ2	COL4A1	6.11477e-239	71.2424	0.845	0.425	2.09914e-234
Ven.01.TSHZ2	VWF	9.73856e-185	70.7815	0.92	0.722	3.34315e-180
Ven.01.TSHZ2	ATXN1	2.62831e-110	70.7551	0.691	0.392	9.02274e-106
Ven.01.TSHZ2	APBB2	1.53966e-291	70.3998	0.89	0.468	5.28549e-287
Ven.01.TSHZ2	MACF1	6.22053e-298	70.3171	0.948	0.657	2.13545e-293
Ven.01.TSHZ2	AFAP1L1	2.99749e-248	69.9482	0.727	0.243	1.02901e-243
Ven.01.TSHZ2	TIMP3	7.12992e-10	69.084	0.799	0.78	2.44763e-05
Ven.01.TSHZ2	OSBPL8	1.89065e-50	68.5511	0.488	0.279	6.49041e-46
Ven.01.TSHZ2	TLL1	4.00385e-161	68.3388	0.367	0.02	1.37448e-156
Ven.01.TSHZ2	SMAD1	7.24576e-137	68.3114	0.648	0.283	2.4874e-132
Ven.01.TSHZ2	DIPK2B	4.98073e-175	67.6872	0.784	0.446	1.70983e-170
Ven.01.TSHZ2	CPM	7.78682e-90	67.3574	0.372	0.106	2.67314e-85
Ven.01.TSHZ2	CYYR1	3.93849e-153	66.7074	0.775	0.507	1.35205e-148
Ven.01.TSHZ2	FILIP1	2.12192e-114	66.4535	0.47	0.145	7.28435e-110
Ven.01.TSHZ2	RHOA	9.72877e-35	65.9962	0.54	0.696	3.33979e-30
Ven.01.TSHZ2	IL4R	6.1766e-164	65.5744	0.656	0.252	2.12037e-159
Ven.01.TSHZ2	VCL	1.16125e-45	65.0103	0.452	0.244	3.98645e-41
Ven.01.TSHZ2	CASC15	1.12138e-68	64.9636	0.348	0.119	3.8496e-64
Ven.01.TSHZ2	MIR4435-2HG	8.36263e-207	63.6421	0.691	0.25	2.87081e-202
Ven.01.TSHZ2	PTPRG	9.18868e-294	63.5681	0.972	0.766	3.15438e-289
Ven.01.TSHZ2	THSD7A	3.68204e-148	62.9634	0.686	0.324	1.26401e-143
Ven.01.TSHZ2	SLC4A7	2.09621e-185	62.0973	0.583	0.149	7.19608e-181
Ven.01.TSHZ2	CCDC50	1.42357e-71	61.8247	0.715	0.525	4.88696e-67
Ven.01.TSHZ2	ADGRF5	5.76364e-95	61.5547	0.863	0.707	1.9786e-90
Ven.01.TSHZ2	ASAP1	0	61.5338	0.929	0.597	0
Ven.01.TSHZ2	JAK2	3.41235e-65	61.2333	0.429	0.181	1.17143e-60
Ven.01.TSHZ2	FMNL2	2.22525e-95	60.8703	0.575	0.281	7.63907e-91
Ven.01.TSHZ2	CREB3L2	1.79826e-74	60.689	0.418	0.162	6.17325e-70
Ven.01.TSHZ2	EPHA4	2.70742e-58	60.6827	0.613	0.403	9.2943e-54
Ven.01.TSHZ2	TGFBR2	1.0986e-124	60.5286	0.803	0.565	3.77139e-120
Ven.01.TSHZ2	BDKRB2	3.2555e-123	60.3145	0.345	0.043	1.11758e-118
Ven.01.TSHZ2	VAV3	0	60.2144	0.671	0.082	0
Ven.01.TSHZ2	MKLN1	7.41111e-155	59.8014	0.753	0.407	2.54416e-150
Ven.01.TSHZ2	OSMR	2.44978e-39	59.5959	0.535	0.35	8.40985e-35
Ven.01.TSHZ2	DENND3	9.53278e-110	59.5291	0.521	0.199	3.27251e-105
Ven.01.TSHZ2	CCNY	3.82474e-63	59.2356	0.809	0.614	1.31299e-58
Ven.01.TSHZ2	ITGAV	7.85725e-76	58.1401	0.622	0.357	2.69731e-71
Ven.01.TSHZ2	PREX2	7.04455e-237	57.8154	0.899	0.568	2.41832e-232
Ven.01.TSHZ2	MBNL1	9.80221e-116	57.7973	0.803	0.606	3.365e-111
Ven.01.TSHZ2	EFNB2	3.09618e-64	57.7902	0.558	0.333	1.06289e-59
Ven.01.TSHZ2	STARD13	1.06579e-177	57.6155	0.8	0.453	3.65877e-173
Ven.01.TSHZ2	KALRN	0	56.9212	0.854	0.281	0
Ven.01.TSHZ2	PKD1L1	6.97729e-163	56.7736	0.398	0.036	2.39523e-158
Ven.01.TSHZ2	DGKH	1.59618e-270	56.609	0.83	0.39	5.47953e-266
Ven.01.TSHZ2	C2orf27A	4.41243e-143	56.572	0.432	0.078	1.51474e-138
Ven.01.TSHZ2	PRKCE	1.74405e-123	56.5523	0.604	0.244	5.98716e-119
Ven.01.TSHZ2	RP1	2.28448e-67	56.5209	0.274	0.065	7.84241e-63
Ven.01.TSHZ2	PICALM	6.64035e-204	56.3548	0.898	0.637	2.27957e-199
Ven.01.TSHZ2	BAG3	0.15873	56.3546	0.312	0.32	1
Ven.01.TSHZ2	HSP90AA1	3.9449e-143	56.3524	0.499	0.838	1.35424e-138
Ven.01.TSHZ2	NCOA1	2.06982e-108	56.3471	0.786	0.531	7.10547e-104
Ven.01.TSHZ2	ITPR2	4.85626e-128	56.3284	0.535	0.188	1.66711e-123
Ven.01.TSHZ2	FLI1	6.16661e-216	56.0742	0.852	0.463	2.11693e-211
Ven.01.TSHZ2	MARCH3	0	55.8591	0.576	0.012	0
Ven.01.TSHZ2	ALCAM	2.75043e-92	54.9137	0.397	0.122	9.44194e-88
Ven.01.TSHZ2	EBF1	1.03675e-84	54.5166	0.653	0.387	3.55906e-80
Ven.01.TSHZ2	GPCPD1	8.87682e-39	54.2722	0.711	0.536	3.04732e-34
Ven.01.TSHZ2	RBPJ	3.15126e-28	54.0026	0.354	0.203	1.0818e-23
Ven.01.TSHZ2	SOX5	2.5605e-104	53.9743	0.595	0.301	8.78993e-100
Ven.01.TSHZ2	RASGRP3	5.09528e-252	53.8262	0.797	0.37	1.74916e-247
Ven.01.TSHZ2	MAGI3	4.65874e-42	53.7465	0.424	0.227	1.5993e-37
Ven.01.TSHZ2	PLD1	3.29252e-193	53.4817	0.506	0.076	1.13029e-188
Ven.01.TSHZ2	MEF2A	1.0232e-136	53.4744	0.785	0.546	3.51256e-132
Ven.01.TSHZ2	SLC7A1	2.63498e-41	53.2607	0.28	0.498	9.04564e-37
Ven.01.TSHZ2	DYSF	1.20438e-256	53.007	0.687	0.176	4.13451e-252
Ven.01.TSHZ2	EDNRB	8.73141e-63	52.8883	0.378	0.149	2.99741e-58
Ven.01.TSHZ2	RHOJ	9.33232e-254	52.8823	0.771	0.291	3.20369e-249
Ven.01.TSHZ2	PAPSS2	1.44188e-10	52.8143	0.485	0.407	4.94983e-06
Ven.01.TSHZ2	RAPGEF6	3.56766e-134	52.7629	0.567	0.193	1.22474e-129
Ven.01.TSHZ2	MCL1	0.984214	52.6226	0.56	0.571	1
Ven.01.TSHZ2	ARHGAP6	1.24692e-114	52.5499	0.299	0.029	4.28057e-110
Ven.01.TSHZ2	EXT1	1.11971e-201	52.0529	0.684	0.246	3.84384e-197
Ven.01.TSHZ2	TPM4	4.93125e-05	52.0256	0.574	0.534	1
Ven.01.TSHZ2	UBE2E2	2.35239e-230	52.009	0.685	0.208	8.07552e-226
Ven.01.TSHZ2	ELMO1	1.02838e-302	51.8395	0.889	0.472	3.53033e-298
Ven.01.TSHZ2	MBNL2	5.34713e-122	51.8364	0.717	0.426	1.83562e-117
Ven.01.TSHZ2	FOXP1	7.32008e-56	51.8088	0.765	0.626	2.51291e-51
Ven.01.TSHZ2	XIST	3.31986e-120	51.7532	0.68	0.482	1.13967e-115
Ven.01.TSHZ2	FKBP5	3.86409e-78	50.5838	0.682	0.493	1.3265e-73
Ven.01.TSHZ2	HMBOX1	1.58136e-190	50.551	0.667	0.229	5.42866e-186
Ven.01.TSHZ2	CHSY3	3.50473e-203	50.5321	0.491	0.056	1.20314e-198
Ven.01.TSHZ2	KHDRBS2	6.48244e-112	50.3826	0.303	0.032	2.22536e-107
Ven.01.TSHZ2	AC002070.1	7.44494e-271	50.2968	0.523	0.012	2.55577e-266
Ven.01.TSHZ2	FAM214A	2.05028e-259	50.2763	0.524	0.02	7.03839e-255
Ven.01.TSHZ2	ABCG1	2.12524e-55	50.2736	0.492	0.263	7.29572e-51
Ven.01.TSHZ2	LINC00472	6.82166e-224	50.2293	0.484	0.026	2.34181e-219
Ven.01.TSHZ2	CDC42BPA	4.481e-172	49.8188	0.772	0.423	1.53828e-167
Ven.01.TSHZ2	SH3RF3	1.26794e-262	49.6647	0.676	0.142	4.3527e-258
Ven.01.TSHZ2	PHACTR2	2.84959e-136	49.4841	0.634	0.285	9.78237e-132
Ven.01.TSHZ2	PALMD	1.60898e-37	49.1406	0.681	0.55	5.52347e-33
Ven.01.TSHZ2	TTC28	5.59821e-257	49.1396	0.863	0.449	1.92181e-252
Ven.01.TSHZ2	UACA	6.18812e-121	49.1376	0.765	0.484	2.12432e-116
Ven.01.TSHZ2	ERG	3.84451e-201	49.1314	0.846	0.525	1.31978e-196
Ven.01.TSHZ2	ZSWIM6	2.09597e-208	49.1269	0.786	0.354	7.19524e-204
Ven.01.TSHZ2	YBX3	0.545948	49.1263	0.52	0.53	1
Ven.01.TSHZ2	ITIH5	0.00225081	49.0362	0.403	0.383	1
Ven.01.TSHZ2	TMTC1	1.13038e-32	48.6328	0.37	0.207	3.88049e-28
Ven.01.TSHZ2	TNS1	7.3635e-25	48.4388	0.407	0.251	2.52782e-20
Ven.01.TSHZ2	PRKD1	8.99268e-234	48.052	0.707	0.225	3.0871e-229
Ven.01.TSHZ2	NFIB	8.86523e-156	47.8901	0.866	0.704	3.04334e-151
Ven.01.TSHZ2	ZFAND5	0.0351438	47.8273	0.483	0.458	1
Ven.01.TSHZ2	TCF12	1.1298e-248	47.5565	0.874	0.507	3.87849e-244
Ven.01.TSHZ2	SLC9A9	1.40545e-182	47.4318	0.492	0.079	4.82476e-178
Ven.01.TSHZ2	NOSTRIN	3.98269e-96	47.2821	0.799	0.578	1.36722e-91
Ven.01.TSHZ2	PLXNA2	5.64992e-242	47.2764	0.793	0.34	1.93956e-237
Ven.01.TSHZ2	PRICKLE2	0.0717535	47.0403	0.358	0.337	1
Ven.01.TSHZ2	PLXDC2	1.06938e-55	46.2557	0.375	0.166	3.67106e-51
Ven.01.TSHZ2	CNOT6L	7.59276e-41	46.2554	0.625	0.434	2.60652e-36
Ven.01.TSHZ2	SAMD4A	8.69117e-75	46.2532	0.373	0.122	2.98359e-70
Ven.01.TSHZ2	JAG1	2.62e-81	46.215	0.524	0.252	8.9942e-77
Ven.01.TSHZ2	PTPRB	1.85493e-186	46.1847	0.909	0.7	6.36779e-182
Ven.01.TSHZ2	OSBPL3	0	46.1127	0.674	0.097	0
Ven.01.TSHZ2	CYTOR	1.98531e-104	46.1116	0.545	0.222	6.81536e-100
Ven.01.TSHZ2	LEF1	7.43661e-88	45.7897	0.747	0.515	2.55291e-83
Ven.01.TSHZ2	PTPN14	6.90747e-172	45.0263	0.719	0.345	2.37127e-167
Ven.01.TSHZ2	USP13	7.29089e-142	44.9913	0.461	0.101	2.50289e-137
Ven.01.TSHZ2	AC114757.1	1.63054e-294	44.8089	0.563	0.014	5.59748e-290
Ven.01.TSHZ2	ETS1	3.60555e-234	44.7775	0.831	0.456	1.23775e-229
Ven.01.TSHZ2	SPARCL1	7.19885e-08	44.7691	0.842	0.909	0.00247129
Ven.01.TSHZ2	SLC12A2	8.80457e-40	44.7298	0.528	0.353	3.02252e-35
Ven.01.TSHZ2	PIP4K2A	3.81734e-112	44.5433	0.553	0.228	1.31045e-107
Ven.01.TSHZ2	MT-ND5	0.000849504	44.4569	0.676	0.727	1
Ven.01.TSHZ2	SMAD3	5.89406e-49	43.9758	0.347	0.146	2.02337e-44
Ven.01.TSHZ2	CGNL1	3.49723e-28	43.9186	0.215	0.392	1.20056e-23
Ven.01.TSHZ2	ATP11A	1.12565e-174	43.4484	0.723	0.337	3.86425e-170
Ven.01.TSHZ2	MYRIP	0.00398596	43.3703	0.535	0.552	1
Ven.01.TSHZ2	CCN1	0.000391655	43.3655	0.337	0.294	1
Ven.01.TSHZ2	ARHGEF28	4.74949e-141	43.3614	0.529	0.154	1.63045e-136
Ven.01.TSHZ2	ERBIN	5.4443e-180	43.342	0.74	0.359	1.86897e-175
Ven.01.TSHZ2	ZBTB16	6.22773e-143	43.3171	0.838	0.586	2.13792e-138
Ven.01.TSHZ2	ANKH	2.52744e-48	43.3041	0.453	0.255	8.67645e-44
Ven.01.TSHZ2	CA2	1.45237e-42	43.3006	0.559	0.381	4.98583e-38
Ven.01.TSHZ2	PCNX1	1.28716e-150	43.2788	0.632	0.242	4.4187e-146
Ven.01.TSHZ2	FOXO1	3.15674e-119	43.2517	0.677	0.346	1.08368e-114
Ven.01.TSHZ2	PDE10A	1.91991e-174	42.9514	0.686	0.275	6.59086e-170
Ven.01.TSHZ2	DLC1	1.49291e-99	42.873	0.719	0.444	5.125e-95
Ven.01.TSHZ2	NUDT4	6.94781e-24	42.8375	0.277	0.142	2.38512e-19
Ven.01.TSHZ2	TANC2	1.33506e-161	42.7177	0.597	0.206	4.58314e-157
Ven.01.TSHZ2	CMTM8	1.16273e-110	42.3405	0.681	0.382	3.99154e-106
Ven.01.TSHZ2	KIF5C	3.60702e-118	42.2084	0.363	0.063	1.23825e-113
Ven.01.TSHZ2	BMP2K	2.30861e-114	42.2044	0.58	0.248	7.92524e-110
Ven.01.TSHZ2	SNRK	1.82565e-229	42.0537	0.716	0.256	6.26727e-225
Ven.01.TSHZ2	TBL1XR1	5.71666e-137	41.927	0.696	0.374	1.96247e-132
Ven.01.TSHZ2	PARP14	1.47685e-60	41.9202	0.63	0.393	5.06987e-56
Ven.01.TSHZ2	LTBP1	1.70007e-85	41.7357	0.371	0.108	5.83616e-81
Ven.01.TSHZ2	WSB1	6.41226e-48	41.3478	0.778	0.592	2.20126e-43
Ven.01.TSHZ2	PKP4	6.15989e-234	41.1505	0.865	0.491	2.11463e-229
Ven.01.TSHZ2	KCNE3	3.38749e-84	40.988	0.298	0.061	1.16289e-79
Ven.01.TSHZ2	BMPR2	2.97649e-220	40.6711	0.893	0.594	1.0218e-215
Ven.01.TSHZ2	PRIM2	4.43628e-47	40.5585	0.259	0.085	1.52293e-42
Ven.01.TSHZ2	ZBTB20	5.64921e-148	40.5111	0.873	0.644	1.93932e-143
Ven.01.TSHZ2	CCDC3	2.15396e-68	40.4974	0.292	0.076	7.39431e-64
Ven.01.TSHZ2	DLEU2	2.56897e-254	40.4892	0.8	0.349	8.81902e-250
Ven.01.TSHZ2	JMJD1C	6.37193e-208	40.4865	0.925	0.689	2.18742e-203
Ven.01.TSHZ2	FCHSD2	1.83784e-191	40.4592	0.824	0.462	6.30913e-187
Ven.01.TSHZ2	UVRAG	5.75185e-235	40.4159	0.786	0.35	1.97455e-230
Ven.01.TSHZ2	KIF13A	1.23616e-85	40.137	0.595	0.3	4.2436e-81
Ven.01.TSHZ2	MT-ND4L	1.35326e-57	39.9653	0.52	0.349	4.64562e-53
Ven.01.TSHZ2	PDLIM1	1.02122e-68	39.7955	0.518	0.241	3.50575e-64
Ven.01.TSHZ2	ARHGEF12	2.483e-218	39.5201	0.837	0.474	8.52391e-214
Ven.01.TSHZ2	FCHO2	4.92746e-194	39.0816	0.796	0.417	1.69155e-189
Ven.01.TSHZ2	IQSEC1	2.16929e-246	39.0703	0.793	0.337	7.44696e-242
Ven.01.TSHZ2	CSGALNACT1	5.25285e-200	39.0422	0.683	0.235	1.80325e-195
Ven.01.TSHZ2	UTRN	3.53651e-228	39.0324	0.93	0.663	1.21405e-223
Ven.01.TSHZ2	GMDS	2.44296e-85	38.9569	0.651	0.397	8.38645e-81
Ven.01.TSHZ2	PEAK1	1.08481e-186	38.8647	0.713	0.298	3.72405e-182
Ven.01.TSHZ2	ITGA2	9.14116e-112	38.7274	0.449	0.131	3.13807e-107
Ven.01.TSHZ2	NUAK1	2.91192e-174	38.6859	0.602	0.183	9.99634e-170
Ven.01.TSHZ2	ZC3HAV1	5.88159e-14	38.6242	0.472	0.338	2.01909e-09
Ven.01.TSHZ2	GNG2	1.36066e-94	38.6188	0.299	0.048	4.67102e-90
Ven.01.TSHZ2	MSN	4.72822e-28	38.6111	0.662	0.52	1.62315e-23
Ven.01.TSHZ2	ITFG1	3.50062e-119	38.5799	0.651	0.335	1.20173e-114
Ven.01.TSHZ2	RGL1	4.07402e-212	38.2348	0.555	0.096	1.39857e-207
Ven.01.TSHZ2	RERE	6.77257e-213	37.9757	0.826	0.475	2.32496e-208
Ven.01.TSHZ2	MIR181A1HG	5.74144e-222	37.7258	0.682	0.212	1.97098e-217
Ven.01.TSHZ2	KIAA0355	3.576e-240	37.7108	0.49	0.016	1.2276e-235
Ven.01.TSHZ2	LIMS1	5.7001e-83	37.5995	0.622	0.378	1.95679e-78
Ven.01.TSHZ2	TBCD	2.19316e-267	37.578	0.746	0.224	7.52892e-263
Ven.01.TSHZ2	FTX	8.91335e-239	37.4165	0.872	0.493	3.05986e-234
Ven.01.TSHZ2	KITLG	4.30834e-64	37.3557	0.287	0.078	1.47901e-59
Ven.01.TSHZ2	PPFIBP1	2.2938e-52	37.2008	0.82	0.664	7.8744e-48
Ven.01.TSHZ2	KLHL29	8.21653e-74	37.1703	0.28	0.06	2.82065e-69
Ven.01.TSHZ2	LDLRAD4	2.28269e-48	37.1159	0.562	0.386	7.83623e-44
Ven.01.TSHZ2	DLG1	3.87633e-106	37.0602	0.612	0.307	1.33071e-101
Ven.01.TSHZ2	DENND11	3.66459e-180	37.0594	0.548	0.127	1.25802e-175
Ven.01.TSHZ2	ZNF532	2.52159e-139	36.9748	0.587	0.217	8.65635e-135
Ven.01.TSHZ2	AC119674.1	1.01568e-219	36.7949	0.447	0.012	3.48672e-215
Ven.01.TSHZ2	ZFPM2	5.42266e-107	36.7362	0.643	0.332	1.86154e-102
Ven.01.TSHZ2	CLIC4	9.01044e-55	36.6994	0.734	0.578	3.09319e-50
Ven.01.TSHZ2	MAN1A1	2.43033e-52	36.6714	0.326	0.124	8.34309e-48
Ven.01.TSHZ2	COBLL1	0.283588	36.152	0.599	0.585	1
Ven.01.TSHZ2	EPS8	8.95784e-08	36.1027	0.376	0.313	0.00307514
Ven.01.TSHZ2	KDR	1.17265e-115	36.0729	0.645	0.342	4.02559e-111
Ven.01.TSHZ2	MCF2L	2.06057e-242	35.958	0.794	0.375	7.07372e-238
Ven.01.TSHZ2	PCED1B	6.03668e-181	35.9056	0.437	0.041	2.07233e-176
Ven.01.TSHZ2	FRMD4A	1.56442e-94	35.8484	0.51	0.217	5.37048e-90
Ven.01.TSHZ2	ARHGAP29	1.13284e-163	35.6235	0.872	0.647	3.88892e-159
Ven.01.TSHZ2	APOLD1	0.0619276	35.5658	0.701	0.672	1
Ven.01.TSHZ2	LMBR1	6.13879e-190	35.3265	0.839	0.523	2.10738e-185
Ven.01.TSHZ2	SAMD5	1.54345e-163	35.0887	0.425	0.053	5.2985e-159
Ven.01.TSHZ2	ELL2	6.35712e-68	35.0657	0.539	0.299	2.18234e-63
Ven.01.TSHZ2	NOVA1	1.35456e-106	35.0564	0.607	0.3	4.65007e-102
Ven.01.TSHZ2	CHST15	2.86007e-150	34.9126	0.48	0.109	9.81832e-146
Ven.01.TSHZ2	SLC20A1	3.80509e-91	34.8341	0.485	0.187	1.30625e-86
Ven.01.TSHZ2	SLC2A3	9.43751e-06	34.8246	0.469	0.375	0.32398
Ven.01.TSHZ2	FAM171A1	1.16572e-55	34.8131	0.339	0.131	4.0018e-51
Ven.01.TSHZ2	CDK17	4.83809e-286	34.751	0.828	0.333	1.66087e-281
Ven.01.TSHZ2	WNK1	2.93304e-61	34.7413	0.574	0.343	1.00688e-56
Ven.01.TSHZ2	HEG1	6.72521e-32	34.7141	0.721	0.593	2.3087e-27
Ven.01.TSHZ2	ZMYND8	6.0167e-39	34.7076	0.485	0.288	2.06547e-34
Ven.01.TSHZ2	EMP1	1.81748e-84	34.688	0.622	0.317	6.23922e-80
Ven.01.TSHZ2	PELI2	1.54268e-86	34.6229	0.47	0.185	5.29588e-82
Ven.01.TSHZ2	KLF7	2.01112e-113	34.5756	0.678	0.367	6.90398e-109
Ven.01.TSHZ2	ARID1B	6.84057e-197	34.5429	0.824	0.468	2.3483e-192
Ven.01.TSHZ2	DYRK1A	4.82052e-126	34.3316	0.648	0.301	1.65483e-121
Ven.01.TSHZ2	NAV3	9.18293e-74	34.2709	0.267	0.054	3.15241e-69
Ven.01.TSHZ2	SFMBT2	1.17325e-188	34.258	0.653	0.214	4.02764e-184
Ven.01.TSHZ2	ATP8B1	5.02647e-239	34.0577	0.696	0.188	1.72554e-234
Ven.01.TSHZ2	NHSL1	5.42247e-149	33.9796	0.546	0.165	1.86148e-144
Ven.01.TSHZ2	NRCAM	2.20458e-153	33.8991	0.449	0.083	7.56812e-149
Ven.01.TSHZ2	ST8SIA4	1.97788e-160	33.7188	0.574	0.184	6.78988e-156
Ven.01.TSHZ2	PLCL1	1.27085e-200	33.6049	0.568	0.124	4.36272e-196
Ven.01.TSHZ2	OSBPL10	4.80347e-163	33.5172	0.541	0.134	1.64898e-158
Ven.01.TSHZ2	EHD4	1.19232e-195	33.3774	0.694	0.262	4.09311e-191
Ven.01.TSHZ2	MTSS1	1.01344e-114	33.3705	0.672	0.366	3.47902e-110
Ven.01.TSHZ2	SAMD12	0.74844	33.2977	0.425	0.471	1
Ven.01.TSHZ2	ANKRD28	1.59372e-131	33.2851	0.642	0.302	5.47109e-127
Ven.01.TSHZ2	LRMDA	9.58692e-283	33.2727	0.874	0.434	3.29109e-278
Ven.01.TSHZ2	GLIS3	1.43615e-51	33.2714	0.43	0.215	4.93016e-47
Ven.01.TSHZ2	ZNF608	6.20498e-131	33.263	0.435	0.093	2.13011e-126
Ven.01.TSHZ2	SPRY4	4.00487e-194	33.2177	0.533	0.094	1.37483e-189
Ven.01.TSHZ2	RABGAP1L	5.39343e-142	33.2145	0.692	0.355	1.85151e-137
Ven.01.TSHZ2	ARHGAP18	3.19633e-87	33.1858	0.596	0.329	1.09727e-82
Ven.01.TSHZ2	RFX3	2.03323e-230	33.1458	0.783	0.338	6.97989e-226
Ven.01.TSHZ2	TEK	1.49503e-71	33.0748	0.561	0.303	5.13228e-67
Ven.01.TSHZ2	PLCL2	1.66713e-215	32.7753	0.583	0.116	5.72308e-211
Ven.01.TSHZ2	RASGRF2	5.95798e-254	32.7363	0.799	0.351	2.04532e-249
Ven.01.TSHZ2	EGLN1	2.75179e-124	32.7202	0.579	0.233	9.44662e-120
Ven.01.TSHZ2	PAM	3.51327e-140	32.4735	0.82	0.548	1.20607e-135
Ven.01.TSHZ2	PPP1R15A	1.57781e-46	32.1055	0.222	0.419	5.41647e-42
Ven.01.TSHZ2	EML1	3.28623e-145	32.0895	0.577	0.193	1.12813e-140
Ven.01.TSHZ2	MYO1D	0	32.076	0.713	0.126	0
Ven.01.TSHZ2	STC1	9.64149e-35	31.9904	0.331	0.156	3.30983e-30
Ven.01.TSHZ2	SH3BGRL2	4.52433e-28	31.9597	0.353	0.201	1.55316e-23
Ven.01.TSHZ2	SPSB1	7.61125e-120	31.8705	0.382	0.07	2.61286e-115
Ven.01.TSHZ2	SIK2	5.09077e-111	31.8603	0.564	0.232	1.74761e-106
Ven.01.TSHZ2	DIAPH2	5.73395e-266	31.8336	0.699	0.178	1.96841e-261
Ven.01.TSHZ2	DISP1	1.06187e-91	31.8194	0.435	0.151	3.64531e-87
Ven.01.TSHZ2	AC090630.1	1.14785e-163	31.8111	0.35	0.009	3.94044e-159
Ven.01.TSHZ2	FAM126A	4.45549e-154	31.7822	0.341	0.012	1.52953e-149
Ven.01.TSHZ2	CD55	9.27592e-16	31.59	0.353	0.244	3.18433e-11
Ven.01.TSHZ2	IFI44	1.61496e-78	31.582	0.584	0.325	5.54399e-74
Ven.01.TSHZ2	AGPAT4	6.12864e-75	31.3871	0.36	0.109	2.1039e-70
Ven.01.TSHZ2	STOX2	2.58961e-64	31.3236	0.411	0.172	8.88988e-60
Ven.01.TSHZ2	ST3GAL6	1.34737e-128	31.2758	0.559	0.218	4.6254e-124
Ven.01.TSHZ2	FNIP2	1.25767e-54	31.1557	0.518	0.288	4.31747e-50
Ven.01.TSHZ2	AL033504.1	7.41867e-145	31.1077	0.299	0.001	2.54676e-140
Ven.01.TSHZ2	PHLPP1	2.16439e-100	30.9663	0.545	0.245	7.43013e-96
Ven.01.TSHZ2	FAM172A	1.73848e-162	30.7872	0.716	0.336	5.96803e-158
Ven.01.TSHZ2	HIF1A	1.82073e-89	30.7794	0.565	0.278	6.25037e-85
Ven.01.TSHZ2	AFDN	7.69116e-139	30.7293	0.793	0.488	2.6403e-134
Ven.01.TSHZ2	SEC14L1	5.36151e-113	30.7236	0.871	0.733	1.84055e-108
Ven.01.TSHZ2	RBMS1	4.31599e-199	30.7089	0.765	0.38	1.48164e-194
Ven.01.TSHZ2	GAB1	5.07057e-109	30.5106	0.594	0.267	1.74068e-104
Ven.01.TSHZ2	FAM171B	9.33017e-27	30.5025	0.27	0.134	3.20295e-22
Ven.01.TSHZ2	AGTPBP1	8.91842e-114	30.4733	0.538	0.2	3.06161e-109
Ven.01.TSHZ2	NLK	6.08306e-193	30.3842	0.735	0.321	2.08825e-188
Ven.01.TSHZ2	ARHGEF10	7.76598e-173	30.3724	0.652	0.232	2.66598e-168
Ven.01.TSHZ2	ABCG2	1.04997e-51	30.316	0.505	0.698	3.60444e-47
Ven.01.TSHZ2	CACHD1	2.95603e-240	30.3047	0.589	0.086	1.01477e-235
Ven.01.TSHZ2	SLC7A5	3.07848e-64	30.1952	0.291	0.567	1.05681e-59
Ven.01.TSHZ2	STT3B	3.77833e-128	30.1902	0.54	0.192	1.29706e-123
Ven.01.TSHZ2	MMRN1	5.32746e-109	30.186	0.363	0.071	1.82886e-104
Ven.01.TSHZ2	MED13L	4.21523e-172	29.9563	0.811	0.476	1.44705e-167
Ven.01.TSHZ2	DCBLD1	1.33983e-78	29.9236	0.401	0.133	4.59949e-74
Ven.01.TSHZ2	MYO6	2.2736e-181	29.7612	0.788	0.436	7.80503e-177
Ven.01.TSHZ2	AL353138.1	4.18694e-164	29.7062	0.343	0.005	1.43734e-159
Ven.01.TSHZ2	FGD6	5.36467e-135	29.6601	0.68	0.322	1.84164e-130
Ven.01.TSHZ2	SH3TC1	2.90081e-125	29.49	0.422	0.092	9.95818e-121
Ven.01.TSHZ2	FAR2	2.99274e-139	29.4482	0.434	0.084	1.02738e-134
Ven.01.TSHZ2	TMOD2	6.12936e-203	29.4445	0.608	0.154	2.10415e-198
Ven.01.TSHZ2	PIK3C2A	5.19392e-182	29.4442	0.8	0.425	1.78302e-177
Ven.01.TSHZ2	RDX	5.08644e-82	29.0947	0.716	0.475	1.74612e-77
Ven.01.TSHZ2	RFX2	2.38906e-72	29.0333	0.254	0.046	8.20139e-68
Ven.01.TSHZ2	TGFBR3	1.13882e-79	28.9814	0.486	0.216	3.90945e-75
Ven.01.TSHZ2	THSD4	0.209308	28.9531	0.467	0.461	1
Ven.01.TSHZ2	MT-ATP8	6.59939e-31	28.9434	0.344	0.188	2.2655e-26
Ven.01.TSHZ2	ATP1A1	0.583854	28.9434	0.367	0.363	1
Ven.01.TSHZ2	COL15A1	5.15834e-112	28.9433	0.457	0.123	1.77081e-107
Ven.01.TSHZ2	ITGA6	9.62279e-49	28.9239	0.726	0.579	3.30341e-44
Ven.01.TSHZ2	ANKRD11	1.2442e-194	28.7866	0.748	0.347	4.27121e-190
Ven.01.TSHZ2	INPP5D	1.39273e-126	28.6127	0.638	0.278	4.7811e-122
Ven.01.TSHZ2	JAZF1	4.10977e-208	28.5509	0.608	0.143	1.41084e-203
Ven.01.TSHZ2	GRK5	5.35078e-193	28.4041	0.595	0.144	1.83687e-188
Ven.01.TSHZ2	YPEL2	1.15465e-96	28.3851	0.474	0.171	3.96381e-92
Ven.01.TSHZ2	AKAP13	1.44145e-272	28.3464	0.845	0.411	4.94836e-268
Ven.01.TSHZ2	CDKAL1	8.41957e-113	28.2963	0.621	0.309	2.89036e-108
Ven.01.TSHZ2	MGAT4A	1.76416e-243	28.2635	0.751	0.283	6.05619e-239
Ven.01.TSHZ2	AL049828.1	3.70164e-117	28.1468	0.27	0.01	1.27074e-112
Ven.01.TSHZ2	PARD3	0.709165	28.135	0.312	0.315	1
Ven.01.TSHZ2	IRAK3	8.96124e-52	28.1325	0.683	0.455	3.0763e-47
Ven.01.TSHZ2	ARGLU1	2.34531e-140	27.9394	0.848	0.574	8.05121e-136
Ven.01.TSHZ2	ARHGEF6	8.62311e-84	27.8329	0.359	0.097	2.96023e-79
Ven.01.TSHZ2	BCAT1	8.11886e-79	27.7908	0.301	0.067	2.78712e-74
Ven.01.TSHZ2	SPTBN1	1.74454e-138	27.7298	0.93	0.793	5.98884e-134
Ven.01.TSHZ2	UHRF2	2.34475e-165	27.5993	0.578	0.161	8.0493e-161
Ven.01.TSHZ2	PRKCH	9.75521e-290	27.5007	0.913	0.55	3.34887e-285
Ven.01.TSHZ2	MSRB3	2.34413e-76	27.4873	0.565	0.307	8.04717e-72
Ven.01.TSHZ2	SASH1	3.21399e-146	27.4687	0.797	0.48	1.10333e-141
Ven.01.TSHZ2	AKT3	4.05936e-178	27.4606	0.897	0.604	1.39354e-173
Ven.01.TSHZ2	SHANK3	5.42792e-294	27.4208	0.796	0.272	1.86335e-289
Ven.01.TSHZ2	TBC1D9	2.61526e-112	27.3212	0.519	0.181	8.97792e-108
Ven.01.TSHZ2	ADAM17	2.46658e-34	27.2601	0.401	0.229	8.46751e-30
Ven.01.TSHZ2	DMXL2	1.52401e-80	27.1758	0.281	0.053	5.23178e-76
Ven.01.TSHZ2	CD46	2.66593e-18	27.0836	0.616	0.494	9.15186e-14
Ven.01.TSHZ2	BRAF	4.52845e-142	27.0791	0.678	0.297	1.55457e-137
Ven.01.TSHZ2	BTNL9	4.15562e-15	27.0673	0.525	0.434	1.42658e-10
Ven.01.TSHZ2	USP9X	4.43402e-124	26.7537	0.61	0.269	1.52216e-119
Ven.01.TSHZ2	KCNQ1	1.41007e-210	26.7255	0.549	0.094	4.84063e-206
Ven.01.TSHZ2	CD200	4.98022e-98	26.7222	0.426	0.129	1.70966e-93
Ven.01.TSHZ2	EIF4G3	2.33374e-293	26.6752	0.874	0.415	8.01148e-289
Ven.01.TSHZ2	MCU	8.76816e-99	26.6352	0.45	0.145	3.01002e-94
Ven.01.TSHZ2	NCOA3	2.48743e-206	26.6017	0.739	0.306	8.5391e-202
Ven.01.TSHZ2	CRPPA	3.84427e-140	26.5557	0.402	0.063	1.3197e-135
Ven.01.TSHZ2	COL21A1	4.63013e-110	26.514	0.301	0.033	1.58948e-105
Ven.01.TSHZ2	AC016831.7	5.45489e-113	26.4071	0.271	0.014	1.87261e-108
Ven.01.TSHZ2	MEF2C	8.01812e-208	26.2441	0.85	0.546	2.75254e-203
Ven.01.TSHZ2	DLEU1	7.69021e-26	26.2348	0.303	0.166	2.63997e-21
Ven.01.TSHZ2	CNTNAP3B	1.46457e-67	26.1934	0.344	0.111	5.02771e-63
Ven.01.TSHZ2	GRAMD1A	6.9692e-109	26.1594	0.53	0.19	2.39246e-104
Ven.01.TSHZ2	PPM1H	1.58432e-15	26.0745	0.385	0.276	5.43882e-11
Ven.01.TSHZ2	SPRY1	3.77526e-133	26.0713	0.702	0.298	1.29601e-128
Ven.01.TSHZ2	RNF213	3.57943e-79	26.0612	0.625	0.355	1.22878e-74
Ven.01.TSHZ2	MSI2	1.47298e-97	26.03	0.697	0.415	5.0566e-93
Ven.01.TSHZ2	RANBP17	4.10431e-108	25.7833	0.464	0.156	1.40897e-103
Ven.01.TSHZ2	CTNND1	1.37849e-150	25.7024	0.8	0.513	4.7322e-146
Ven.01.TSHZ2	AFF1	6.44812e-213	25.6527	0.848	0.472	2.21358e-208
Ven.01.TSHZ2	PDZD2	8.28921e-08	25.6044	0.307	0.389	0.0028456
Ven.01.TSHZ2	JAK1	2.39881e-123	25.6037	0.829	0.627	8.23488e-119
Ven.01.TSHZ2	PDK4	9.31573e-07	25.561	0.23	0.296	0.03198
Ven.01.TSHZ2	MDM2	6.25368e-85	25.5264	0.421	0.141	2.14682e-80
Ven.01.TSHZ2	ITPRID2	6.05017e-71	25.4205	0.554	0.288	2.07696e-66
Ven.01.TSHZ2	RIN2	2.60226e-139	25.4006	0.798	0.508	8.9333e-135
Ven.01.TSHZ2	ITPKB	6.39789e-86	25.3478	0.457	0.171	2.19633e-81
Ven.01.TSHZ2	ZMIZ1	8.05611e-86	25.2034	0.496	0.208	2.76558e-81
Ven.01.TSHZ2	RUNX1T1	5.61181e-51	25.1617	0.434	0.224	1.92648e-46
Ven.01.TSHZ2	ENTPD1	1.65534e-138	25.0918	0.727	0.406	5.68261e-134
Ven.01.TSHZ2	ELOVL5	5.70176e-78	25.0581	0.551	0.275	1.95736e-73
Ven.01.TSHZ2	SEMA6D	2.14543e-75	25.0418	0.263	0.049	7.36505e-71
Ven.01.TSHZ2	TNS3	8.80609e-77	24.9432	0.297	0.068	3.02304e-72
Ven.01.TSHZ2	AGAP1	8.53455e-75	24.6625	0.629	0.395	2.92982e-70
Ven.01.TSHZ2	LIFR	0.00479921	24.6153	0.404	0.448	1
Ven.01.TSHZ2	RTN1	8.81265e-27	24.6153	0.313	0.171	3.02529e-22
Ven.01.TSHZ2	PHACTR1	8.0124e-178	24.6151	0.687	0.262	2.75058e-173
Ven.01.TSHZ2	FLVCR2	7.37438e-47	24.5869	0.355	0.154	2.53155e-42
Ven.01.TSHZ2	DGKD	1.61646e-210	24.5846	0.543	0.084	5.54913e-206
Ven.01.TSHZ2	SLCO2B1	6.13061e-18	24.5451	0.313	0.47	2.10458e-13
Ven.01.TSHZ2	SNED1	9.66879e-105	24.5322	0.718	0.418	3.3192e-100
Ven.01.TSHZ2	DISC1	5.36199e-283	24.4925	0.758	0.218	1.84072e-278
Ven.01.TSHZ2	LYST	1.93055e-74	24.4614	0.506	0.233	6.6274e-70
Ven.01.TSHZ2	LDLRAD3	5.86192e-96	24.4496	0.652	0.374	2.01234e-91
Ven.01.TSHZ2	FOXO3	0.00017038	24.4124	0.495	0.441	1
Ven.01.TSHZ2	EVA1C	1.71296e-41	24.3419	0.464	0.26	5.88041e-37
Ven.01.TSHZ2	CHST11	1.6231e-163	24.3267	0.593	0.194	5.57194e-159
Ven.01.TSHZ2	DPYD	7.26769e-64	24.2485	0.524	0.282	2.49493e-59
Ven.01.TSHZ2	AOPEP	6.60653e-142	24.1654	0.655	0.276	2.26796e-137
Ven.01.TSHZ2	LOXL2	1.15783e-84	24.1597	0.413	0.138	3.97471e-80
Ven.01.TSHZ2	PACS1	5.27981e-129	24.1038	0.57	0.224	1.81251e-124
Ven.01.TSHZ2	VEGFC	2.39618e-28	24.1027	0.274	0.134	8.22586e-24
Ven.01.TSHZ2	UGCG	6.09729e-50	23.9969	0.371	0.161	2.09314e-45
Ven.01.TSHZ2	PREX1	2.77428e-209	23.9736	0.723	0.299	9.52382e-205
Ven.01.TSHZ2	AHI1	2.83065e-65	23.9035	0.446	0.206	9.71732e-61
Ven.01.TSHZ2	AC007319.1	1.65273e-199	23.8209	0.416	0.012	5.67366e-195
Ven.01.TSHZ2	CFLAR	2.50596e-131	23.6372	0.795	0.507	8.60271e-127
Ven.01.TSHZ2	ITGA5	2.18608e-122	23.5909	0.614	0.25	7.50458e-118
Ven.01.TSHZ2	BNC2	3.74464e-70	23.5426	0.311	0.085	1.2855e-65
Ven.01.TSHZ2	PPP1R16B	6.05832e-122	23.511	0.521	0.174	2.07976e-117
Ven.01.TSHZ2	IFNGR1	9.55981e-20	23.3469	0.566	0.658	3.28179e-15
Ven.01.TSHZ2	TSC22D3	7.2349e-23	23.337	0.519	0.643	2.48367e-18
Ven.01.TSHZ2	ARID5B	3.20987e-43	23.3348	0.304	0.125	1.10192e-38
Ven.01.TSHZ2	ATP2B1	3.93443e-103	23.2741	0.478	0.167	1.35065e-98
Ven.01.TSHZ2	SGIP1	4.52538e-93	23.249	0.27	0.034	1.55352e-88
Ven.01.TSHZ2	PLS3	1.1448e-23	23.2348	0.418	0.278	3.92997e-19
Ven.01.TSHZ2	MTUS1	9.7696e-11	23.2073	0.768	0.715	3.3538e-06
Ven.01.TSHZ2	EGR1	9.52358e-23	23.195	0.229	0.384	3.26935e-18
Ven.01.TSHZ2	MAP4K4	1.97289e-179	23.1878	0.756	0.381	6.77275e-175
Ven.01.TSHZ2	RAP1B	3.91206e-60	23.1817	0.7	0.498	1.34297e-55
Ven.01.TSHZ2	WWOX	3.19607e-128	23.1724	0.678	0.343	1.09718e-123
Ven.01.TSHZ2	C22orf34	1.03215e-182	23.1599	0.403	0.017	3.54327e-178
Ven.01.TSHZ2	ROCK2	4.4913e-178	23.1585	0.688	0.28	1.54182e-173
Ven.01.TSHZ2	NUMB	4.94157e-218	23.1303	0.753	0.314	1.69639e-213
Ven.01.TSHZ2	SEMA6A	1.06453e-88	23.1154	0.537	0.242	3.65444e-84
Ven.01.TSHZ2	SLC46A3	1.66153e-44	23.0381	0.316	0.13	5.70386e-40
Ven.01.TSHZ2	SCLT1	5.58616e-182	22.9984	0.563	0.135	1.91767e-177
Ven.01.TSHZ2	SIPA1L1	2.57313e-75	22.9761	0.487	0.221	8.83329e-71
Ven.01.TSHZ2	FHIT	2.67636e-23	22.8941	0.368	0.245	9.18767e-19
Ven.01.TSHZ2	ST3GAL1	7.49292e-79	22.8744	0.524	0.25	2.57225e-74
Ven.01.TSHZ2	PARD3B	2.01978e-162	22.7353	0.619	0.218	6.9337e-158
Ven.01.TSHZ2	XAF1	1.84587e-40	22.713	0.634	0.437	6.3367e-36
Ven.01.TSHZ2	VAPA	0.00493911	22.6748	0.55	0.54	1
Ven.01.TSHZ2	PHLDB1	1.87035e-138	22.6298	0.535	0.16	6.42072e-134
Ven.01.TSHZ2	QKI	2.83784e-56	22.5583	0.809	0.681	9.74202e-52
Ven.01.TSHZ2	PRSS23	4.98303e-40	22.5331	0.605	0.413	1.71063e-35
Ven.01.TSHZ2	NPAS2	1.96168e-105	22.5158	0.608	0.291	6.73427e-101
Ven.01.TSHZ2	ACKR3	2.13394e-64	22.4863	0.266	0.063	7.32562e-60
Ven.01.TSHZ2	JUN	1.34119e-110	22.3467	0.379	0.724	4.60418e-106
Ven.01.TSHZ2	NREP	3.71846e-131	22.2562	0.566	0.214	1.27651e-126
Ven.01.TSHZ2	NAV1	9.08521e-219	22.2383	0.709	0.24	3.11886e-214
Ven.01.TSHZ2	NFKB1	6.44942e-83	22.1701	0.515	0.232	2.21402e-78
Ven.01.TSHZ2	FAT4	3.21576e-99	22.1212	0.436	0.133	1.10394e-94
Ven.01.TSHZ2	MARK4	4.49852e-112	22.1112	0.386	0.079	1.5443e-107
Ven.01.TSHZ2	AUTS2	4.74268e-79	21.9123	0.705	0.517	1.62811e-74
Ven.01.TSHZ2	EGFL7	2.56193e-135	21.8394	0.858	0.645	8.79487e-131
Ven.01.TSHZ2	DNAJC1	3.00649e-69	21.7889	0.671	0.452	1.0321e-64
Ven.01.TSHZ2	ASCC3	7.05065e-159	21.7835	0.602	0.202	2.42042e-154
Ven.01.TSHZ2	GRPEL2	1.06121e-123	21.7759	0.405	0.078	3.64303e-119
Ven.01.TSHZ2	CEP112	7.38499e-190	21.7313	0.713	0.301	2.53519e-185
Ven.01.TSHZ2	AL365295.1	1.54722e-132	21.7275	0.298	0.01	5.31144e-128
Ven.01.TSHZ2	SUCO	3.85388e-53	21.7227	0.349	0.142	1.323e-48
Ven.01.TSHZ2	SVIL	5.39016e-136	21.7174	0.651	0.32	1.85039e-131
Ven.01.TSHZ2	BBS9	4.83342e-43	21.7172	0.678	0.48	1.65927e-38
Ven.01.TSHZ2	CLASP1	4.17085e-216	21.7145	0.742	0.297	1.43181e-211
Ven.01.TSHZ2	SPIDR	2.39974e-139	21.6793	0.682	0.345	8.23806e-135
Ven.01.TSHZ2	SH3D19	3.68895e-185	21.6666	0.633	0.199	1.26638e-180
Ven.01.TSHZ2	NCKAP1	2.88034e-122	21.6575	0.697	0.392	9.8879e-118
Ven.01.TSHZ2	FNBP1L	3.52046e-145	21.6505	0.683	0.334	1.20854e-140
Ven.01.TSHZ2	ITPRIP	3.56485e-50	21.6436	0.416	0.206	1.22378e-45
Ven.01.TSHZ2	FRMD4B	1.05722e-188	21.5657	0.704	0.28	3.62932e-184
Ven.01.TSHZ2	TMTC2	9.45263e-87	21.5502	0.438	0.162	3.24499e-82
Ven.01.TSHZ2	TANC1	7.17196e-193	21.4916	0.851	0.497	2.46206e-188
Ven.01.TSHZ2	GTDC1	4.93869e-97	21.4892	0.436	0.14	1.6954e-92
Ven.01.TSHZ2	STK38L	9.57232e-49	21.4724	0.321	0.127	3.28608e-44
Ven.01.TSHZ2	HIPK3	6.96734e-129	21.424	0.692	0.349	2.39182e-124
Ven.01.TSHZ2	ADD3	2.32706e-118	21.408	0.46	0.133	7.98857e-114
Ven.01.TSHZ2	FOXN3	3.80043e-82	21.3836	0.742	0.482	1.30465e-77
Ven.01.TSHZ2	KLHL5	1.64822e-146	21.3569	0.778	0.475	5.65819e-142
Ven.01.TSHZ2	WASF2	6.68505e-41	21.3475	0.723	0.57	2.29491e-36
Ven.01.TSHZ2	ACVR1	3.86646e-05	21.2591	0.434	0.374	1
Ven.01.TSHZ2	RGS3	1.47752e-82	21.2146	0.621	0.325	5.07219e-78
Ven.01.TSHZ2	LARGE1	6.20162e-70	21.0608	0.51	0.253	2.12895e-65
Ven.01.TSHZ2	PLK2	6.37686e-68	21.0376	0.427	0.182	2.18911e-63
Ven.01.TSHZ2	ACE	3.53934e-20	21.0289	0.265	0.145	1.21502e-15
Ven.01.TSHZ2	MLKL	4.72855e-81	21.0286	0.412	0.134	1.62326e-76
Ven.01.TSHZ2	DDX5	2.36632e-37	20.8104	0.91	0.83	8.12334e-33
Ven.01.TSHZ2	RPGR	3.29738e-183	20.7983	0.74	0.331	1.13196e-178
Ven.01.TSHZ2	MYO10	3.03785e-55	20.7289	0.776	0.574	1.04286e-50
Ven.01.TSHZ2	CHSY1	6.9103e-80	20.6687	0.619	0.354	2.37224e-75
Ven.01.TSHZ2	NF1	1.18209e-164	20.6611	0.71	0.336	4.05799e-160
Ven.01.TSHZ2	PTEN	6.94886e-68	20.575	0.549	0.304	2.38547e-63
Ven.01.TSHZ2	RNF145	1.4792e-98	20.5448	0.592	0.293	5.07793e-94
Ven.01.TSHZ2	TPD52L1	6.23599e-19	20.5384	0.304	0.189	2.14075e-14
Ven.01.TSHZ2	AFAP1	1.67078e-155	20.5134	0.525	0.131	5.73562e-151
Ven.01.TSHZ2	EDIL3	9.07163e-87	20.446	0.363	0.102	3.1142e-82
Ven.01.TSHZ2	TEAD1	4.8362e-90	20.3926	0.654	0.358	1.66022e-85
Ven.01.TSHZ2	MDFIC	1.87775e-121	20.373	0.469	0.127	6.44611e-117
Ven.01.TSHZ2	IQCJ-SCHIP1	5.74107e-156	20.3584	0.361	0.02	1.97085e-151
Ven.01.TSHZ2	SNHG14	5.93033e-185	20.3135	0.684	0.259	2.03582e-180
Ven.01.TSHZ2	SETBP1	6.05115e-84	20.2872	0.391	0.122	2.0773e-79
Ven.01.TSHZ2	ATP10A	1.19779e-55	20.2871	0.338	0.59	4.11191e-51
Ven.01.TSHZ2	SOS1	1.62399e-89	20.2736	0.729	0.466	5.575e-85
Ven.01.TSHZ2	MAP1B	2.19359e-46	20.2635	0.445	0.245	7.53038e-42
Ven.01.TSHZ2	SSH2	2.44118e-164	20.2616	0.651	0.257	8.38033e-160
Ven.01.TSHZ2	KMT2C	5.55987e-113	20.2319	0.657	0.374	1.90865e-108
Ven.01.TSHZ2	ZFHX3	3.19138e-104	20.211	0.622	0.315	1.09557e-99
Ven.01.TSHZ2	MAGI2	3.15642e-94	20.1418	0.526	0.232	1.08357e-89
Ven.01.TSHZ2	ZNF407	4.20214e-203	20.1385	0.673	0.217	1.44255e-198
Ven.01.TSHZ2	PKD2	7.47403e-132	20.1085	0.565	0.197	2.56576e-127
Ven.01.TSHZ2	ANKRD12	6.88418e-54	20.0772	0.632	0.427	2.36327e-49
Ven.01.TSHZ2	ABLIM2	2.28615e-110	20.0047	0.311	0.038	7.84813e-106
Ven.01.TSHZ2	UNC5B	1.5563e-66	19.8116	0.41	0.176	5.34263e-62
Ven.01.TSHZ2	EXOC4	1.85386e-215	19.8115	0.811	0.422	6.3641e-211
Ven.01.TSHZ2	DOCK8	6.38144e-114	19.7057	0.342	0.053	2.19069e-109
Ven.01.TSHZ2	GNAI1	3.42196e-143	19.705	0.433	0.08	1.17473e-138
Ven.01.TSHZ2	TMEM255B	1.2296e-150	19.5811	0.602	0.197	4.2211e-146
Ven.01.TSHZ2	SNCA	1.13885e-84	19.58	0.269	0.043	3.90957e-80
Ven.01.TSHZ2	ADAM10	5.34951e-136	19.4841	0.794	0.513	1.83643e-131
Ven.01.TSHZ2	ADAM19	2.10986e-91	19.3644	0.251	0.025	7.24292e-87
Ven.01.TSHZ2	PLEKHA1	1.23853e-166	19.3513	0.662	0.276	4.25176e-162
Ven.01.TSHZ2	GASK1B	2.18043e-121	19.3451	0.434	0.104	7.48519e-117
Ven.01.TSHZ2	RNF19A	4.39943e-77	19.2981	0.657	0.405	1.51028e-72
Ven.01.TSHZ2	PPP3CA	1.37112e-159	19.2456	0.795	0.461	4.70693e-155
Ven.01.TSHZ2	TDRP	4.39936e-71	19.2392	0.569	0.306	1.51025e-66
Ven.01.TSHZ2	ITSN1	9.23353e-79	19.141	0.474	0.199	3.16978e-74
Ven.01.TSHZ2	PALD1	4.4065e-100	19.138	0.593	0.294	1.51271e-95
Ven.01.TSHZ2	IQGAP2	6.60424e-74	19.0362	0.302	0.075	2.26717e-69
Ven.01.TSHZ2	INPP4A	2.40079e-113	18.9624	0.42	0.1	8.24166e-109
Ven.01.TSHZ2	ACTN4	2.05494e-06	18.9388	0.617	0.564	0.0705441
Ven.01.TSHZ2	LIMCH1	9.0771e-69	18.8445	0.814	0.633	3.11608e-64
Ven.01.TSHZ2	STAT1	0.463957	18.8435	0.305	0.321	1
Ven.01.TSHZ2	CPNE5	4.18047e-159	18.829	0.462	0.078	1.43511e-154
Ven.01.TSHZ2	PMEPA1	7.27536e-42	18.8006	0.349	0.166	2.49756e-37
Ven.01.TSHZ2	ANXA1	6.84895e-33	18.7798	0.278	0.468	2.35118e-28
Ven.01.TSHZ2	CMIP	2.50548e-196	18.7785	0.678	0.226	8.60107e-192
Ven.01.TSHZ2	ADAMTS1	2.98717e-37	18.7751	0.379	0.2	1.02547e-32
Ven.01.TSHZ2	GNA14	6.06081e-195	18.7747	0.523	0.083	2.08061e-190
Ven.01.TSHZ2	DLG2	5.46974e-13	18.7673	0.326	0.235	1.87771e-08
Ven.01.TSHZ2	ATXN7L1	4.52817e-159	18.7355	0.538	0.141	1.55447e-154
Ven.01.TSHZ2	MPZL2	8.73651e-71	18.7319	0.446	0.179	2.99916e-66
Ven.01.TSHZ2	ZBTB38	2.53391e-23	18.7147	0.615	0.496	8.69865e-19
Ven.01.TSHZ2	ZHX3	1.5269e-213	18.6912	0.658	0.181	5.24169e-209
Ven.01.TSHZ2	STIM2	2.25919e-178	18.6329	0.644	0.219	7.75556e-174
Ven.01.TSHZ2	MYOF	3.78406e-74	18.6263	0.434	0.172	1.29903e-69
Ven.01.TSHZ2	MBD5	1.78736e-197	18.6115	0.76	0.361	6.13584e-193
Ven.01.TSHZ2	CSNK1A1	1.07351e-116	18.4612	0.81	0.566	3.68526e-112
Ven.01.TSHZ2	HERC1	5.21329e-204	18.4085	0.728	0.284	1.78967e-199
Ven.01.TSHZ2	ZNF366	1.23206e-95	18.3891	0.539	0.235	4.22953e-91
Ven.01.TSHZ2	TFPI	1.93659e-138	18.38	0.521	0.15	6.6481e-134
Ven.01.TSHZ2	MAP3K13	1.93204e-21	18.3785	0.346	0.218	6.63251e-17
Ven.01.TSHZ2	SCFD2	4.24895e-164	18.3505	0.579	0.168	1.45862e-159
Ven.01.TSHZ2	PDGFB	3.94793e-70	18.1563	0.526	0.269	1.35528e-65
Ven.01.TSHZ2	ANGPT2	4.51765e-71	18.1364	0.618	0.396	1.55086e-66
Ven.01.TSHZ2	SBF2	1.78895e-186	18.0918	0.794	0.41	6.14129e-182
Ven.01.TSHZ2	RYBP	3.95347e-30	18.0828	0.455	0.296	1.35719e-25
Ven.01.TSHZ2	NAP1L1	0.407484	18.0791	0.48	0.472	1
Ven.01.TSHZ2	AC246817.1	3.31501e-124	18.0323	0.264	0.002	1.13801e-119
Ven.01.TSHZ2	PKIG	3.64067e-28	18.0238	0.421	0.258	1.24981e-23
Ven.01.TSHZ2	NOS3	2.12707e-64	17.7976	0.347	0.118	7.302e-60
Ven.01.TSHZ2	CPNE8	1.49013e-117	17.722	0.698	0.392	5.11547e-113
Ven.01.TSHZ2	YWHAQ	0.0395061	17.7068	0.415	0.39	1
Ven.01.TSHZ2	BIRC6	1.62504e-174	17.6906	0.765	0.435	5.5786e-170
Ven.01.TSHZ2	ARHGEF3	2.25067e-69	17.6662	0.44	0.192	7.72634e-65
Ven.01.TSHZ2	RASA1	4.54648e-109	17.5944	0.607	0.271	1.56076e-104
Ven.01.TSHZ2	ETS2	1.18813e-41	17.4723	0.646	0.474	4.07874e-37
Ven.01.TSHZ2	AHCYL2	1.35486e-25	17.4513	0.351	0.211	4.6511e-21
Ven.01.TSHZ2	ABCC4	1.31959e-59	17.4471	0.282	0.081	4.53001e-55
Ven.01.TSHZ2	SNTB2	1.81688e-84	17.4201	0.428	0.152	6.23718e-80
Ven.01.TSHZ2	FLNB	0.00828859	17.4016	0.466	0.432	1
Ven.01.TSHZ2	PDE8A	1.10202e-268	17.3969	0.769	0.254	3.78312e-264
Ven.01.TSHZ2	SKIL	2.73722e-61	17.3777	0.514	0.285	9.3966e-57
Ven.01.TSHZ2	HNRNPA2B1	1.19908e-76	17.3754	0.885	0.774	4.11633e-72
Ven.01.TSHZ2	FOSL2	1.2605e-44	17.3668	0.495	0.297	4.32717e-40
Ven.01.TSHZ2	ATF7IP2	9.1942e-118	17.3353	0.461	0.132	3.15628e-113
Ven.01.TSHZ2	GLCE	1.77197e-70	17.2896	0.397	0.151	6.08301e-66
Ven.01.TSHZ2	ANTXR2	1.99177e-69	17.2889	0.277	0.064	6.83755e-65
Ven.01.TSHZ2	VWA8	2.01885e-145	17.2186	0.498	0.126	6.9305e-141
Ven.01.TSHZ2	SGPP2	5.48992e-16	17.2025	0.148	0.263	1.88463e-11
Ven.01.TSHZ2	TET2	2.19814e-120	17.1958	0.479	0.137	7.546e-116
Ven.01.TSHZ2	CPEB4	5.5335e-58	17.1897	0.506	0.27	1.89959e-53
Ven.01.TSHZ2	DENND4C	4.5051e-184	17.1317	0.742	0.326	1.54656e-179
Ven.01.TSHZ2	FERMT2	1.75139e-70	17.1313	0.505	0.241	6.01235e-66
Ven.01.TSHZ2	TMEM184B	3.71878e-68	17.1087	0.472	0.209	1.27662e-63
Ven.01.TSHZ2	ETNK1	1.07669e-99	17.0969	0.585	0.286	3.69618e-95
Ven.01.TSHZ2	FAM118A	7.7911e-56	17.0566	0.333	0.121	2.67461e-51
Ven.01.TSHZ2	RB1	3.42389e-166	16.9949	0.726	0.363	1.17539e-161
Ven.01.TSHZ2	BTBD3	1.25883e-97	16.9775	0.46	0.162	4.32143e-93
Ven.01.TSHZ2	SLC38A2	3.19161e-45	16.9536	0.617	0.415	1.09565e-40
Ven.01.TSHZ2	MAN2A1	5.14117e-89	16.9179	0.493	0.206	1.76491e-84
Ven.01.TSHZ2	HIPK2	6.70961e-111	16.9172	0.575	0.259	2.30334e-106
Ven.01.TSHZ2	ARHGAP31	3.14924e-224	16.8716	0.79	0.372	1.0811e-219
Ven.01.TSHZ2	ANKS1A	4.47332e-44	16.8713	0.697	0.487	1.53565e-39
Ven.01.TSHZ2	KLF12	0.0742416	16.8375	0.379	0.404	1
Ven.01.TSHZ2	RNF220	1.79789e-55	16.7636	0.428	0.208	6.17198e-51
Ven.01.TSHZ2	ATF7IP	1.98751e-118	16.684	0.554	0.221	6.82293e-114
Ven.01.TSHZ2	DAB2	0.0182258	16.5618	0.365	0.382	1
Ven.01.TSHZ2	GABRE	1.76598e-143	16.5266	0.333	0.018	6.06243e-139
Ven.01.TSHZ2	TNKS	1.68022e-143	16.5107	0.659	0.291	5.76803e-139
Ven.01.TSHZ2	TBC1D5	6.51256e-137	16.5055	0.702	0.37	2.2357e-132
Ven.01.TSHZ2	APCDD1	0.677308	16.5021	0.274	0.279	1
Ven.01.TSHZ2	FZD4	4.02743e-156	16.4716	0.656	0.282	1.38258e-151
Ven.01.TSHZ2	TSPAN7	3.29817e-33	16.3371	0.278	0.127	1.13223e-28
Ven.01.TSHZ2	CYTH1	1.85212e-73	16.1421	0.573	0.306	6.35813e-69
Ven.01.TSHZ2	HIVEP2	1.35382e-92	16.134	0.513	0.215	4.64753e-88
Ven.01.TSHZ2	ZBTB46	3.52573e-113	16.1331	0.536	0.191	1.21035e-108
Ven.01.TSHZ2	MYO5A	3.35765e-201	16.1175	0.509	0.069	1.15265e-196
Ven.01.TSHZ2	PGM2L1	8.29948e-83	16.1115	0.386	0.122	2.84913e-78
Ven.01.TSHZ2	VOPP1	1.26057e-98	16.1069	0.614	0.317	4.32741e-94
Ven.01.TSHZ2	SLCO3A1	3.60946e-21	16.0897	0.475	0.349	1.23909e-16
Ven.01.TSHZ2	DYNC1I1	3.4518e-115	16.054	0.293	0.023	1.18497e-110
Ven.01.TSHZ2	RAP1GDS1	3.93854e-197	16.0254	0.642	0.191	1.35206e-192
Ven.01.TSHZ2	TNRC6B	1.02838e-145	16.002	0.747	0.436	3.53034e-141
Ven.01.TSHZ2	TP53I11	2.95773e-68	15.9813	0.358	0.12	1.01536e-63
Ven.01.TSHZ2	ACTN1	1.1876e-14	15.971	0.338	0.232	4.07692e-10
Ven.01.TSHZ2	MTHFD2L	1.23779e-24	15.9608	0.263	0.136	4.24922e-20
Ven.01.TSHZ2	BACH1	8.18218e-90	15.9578	0.486	0.199	2.80886e-85
Ven.01.TSHZ2	PRKN	6.44382e-95	15.9577	0.53	0.229	2.2121e-90
Ven.01.TSHZ2	ZFYVE28	7.90967e-85	15.9396	0.474	0.18	2.71531e-80
Ven.01.TSHZ2	LRCH1	1.70525e-156	15.9371	0.807	0.456	5.85395e-152
Ven.01.TSHZ2	ACSL4	2.55823e-66	15.9186	0.344	0.115	8.78214e-62
Ven.01.TSHZ2	BACE2	6.38592e-73	15.9148	0.473	0.215	2.19222e-68
Ven.01.TSHZ2	LPCAT2	1.27668e-60	15.8985	0.268	0.069	4.38272e-56
Ven.01.TSHZ2	SRGAP1	1.32827e-130	15.8574	0.459	0.115	4.55982e-126
Ven.01.TSHZ2	GOLPH3	3.65714e-75	15.8539	0.504	0.241	1.25546e-70
Ven.01.TSHZ2	ZNF609	8.64475e-163	15.8309	0.648	0.23	2.96765e-158
Ven.01.TSHZ2	GSE1	4.67858e-85	15.8072	0.416	0.141	1.60611e-80
Ven.01.TSHZ2	SMCHD1	1.53099e-48	15.6907	0.677	0.483	5.25574e-44
Ven.01.TSHZ2	GLS	1.50891e-123	15.6745	0.651	0.341	5.17994e-119
Ven.01.TSHZ2	MSRA	1.13816e-70	15.6695	0.518	0.268	3.90717e-66
Ven.01.TSHZ2	CHD6	1.57813e-85	15.6451	0.53	0.24	5.41756e-81
Ven.01.TSHZ2	KLF3	2.94995e-72	15.6329	0.532	0.274	1.01269e-67
Ven.01.TSHZ2	TGFBR1	4.14833e-90	15.6317	0.321	0.065	1.42408e-85
Ven.01.TSHZ2	RESF1	7.53521e-146	15.6099	0.537	0.16	2.58676e-141
Ven.01.TSHZ2	BZW2	3.42942e-67	15.565	0.306	0.085	1.17729e-62
Ven.01.TSHZ2	PCAT1	1.03599e-41	15.4313	0.255	0.091	3.55646e-37
Ven.01.TSHZ2	SDCCAG8	8.12267e-161	15.431	0.64	0.244	2.78843e-156
Ven.01.TSHZ2	BBX	5.59704e-52	15.3172	0.488	0.278	1.92141e-47
Ven.01.TSHZ2	PIAS1	2.16677e-39	15.3128	0.627	0.433	7.4383e-35
Ven.01.TSHZ2	SULT1B1	1.28562e-52	15.2024	0.321	0.126	4.4134e-48
Ven.01.TSHZ2	STAG1	4.5087e-139	15.1034	0.721	0.412	1.54779e-134
Ven.01.TSHZ2	HSPD1	1.96401e-34	15.0692	0.312	0.494	6.74224e-30
Ven.01.TSHZ2	SRPK2	8.70731e-82	15.0519	0.672	0.435	2.98913e-77
Ven.01.TSHZ2	RUSC2	2.88864e-88	14.9944	0.434	0.147	9.91642e-84
Ven.01.TSHZ2	RFTN1	1.12946e-156	14.9591	0.514	0.115	3.87731e-152
Ven.01.TSHZ2	CAMK1D	9.53318e-103	14.9492	0.539	0.225	3.27265e-98
Ven.01.TSHZ2	SGK1	2.09311e-16	14.9267	0.431	0.327	7.18543e-12
Ven.01.TSHZ2	VEZT	5.84842e-127	14.9259	0.669	0.335	2.00771e-122
Ven.01.TSHZ2	CNOT2	1.46305e-121	14.8775	0.642	0.306	5.02252e-117
Ven.01.TSHZ2	APP	4.21163e-173	14.8567	0.91	0.82	1.44581e-168
Ven.01.TSHZ2	CNST	1.65465e-139	14.8447	0.59	0.204	5.68025e-135
Ven.01.TSHZ2	EPC1	1.03607e-102	14.7177	0.676	0.377	3.55672e-98
Ven.01.TSHZ2	CDYL2	6.04615e-112	14.6658	0.669	0.353	2.07558e-107
Ven.01.TSHZ2	HACE1	1.76931e-71	14.6593	0.336	0.099	6.07388e-67
Ven.01.TSHZ2	ATRX	1.0164e-118	14.626	0.743	0.459	3.48919e-114
Ven.01.TSHZ2	OXR1	5.27914e-30	14.5431	0.439	0.289	1.81228e-25
Ven.01.TSHZ2	DNM3	4.89015e-62	14.5382	0.605	0.354	1.67874e-57
Ven.01.TSHZ2	TMCC3	3.91057e-103	14.5189	0.632	0.321	1.34246e-98
Ven.01.TSHZ2	ASPH	8.9736e-128	14.5166	0.607	0.252	3.08055e-123
Ven.01.TSHZ2	SMAD6	1.10191e-81	14.5153	0.37	0.107	3.78273e-77
Ven.01.TSHZ2	LMCD1	0.304411	14.5129	0.284	0.319	1
Ven.01.TSHZ2	EPC2	7.07695e-172	14.5072	0.59	0.171	2.42945e-167
Ven.01.TSHZ2	DENND4A	4.10574e-106	14.5028	0.607	0.264	1.40946e-101
Ven.01.TSHZ2	NR3C1	1.25104e-68	14.4931	0.621	0.379	4.2947e-64
Ven.01.TSHZ2	CAVIN2	5.59916e-74	14.4802	0.298	0.58	1.92214e-69
Ven.01.TSHZ2	ANKRD26	5.40936e-111	14.4685	0.446	0.124	1.85698e-106
Ven.01.TSHZ2	WWP1	2.97516e-102	14.4333	0.552	0.229	1.02134e-97
Ven.01.TSHZ2	TMEM233	2.04546e-108	14.4066	0.362	0.071	7.02186e-104
Ven.01.TSHZ2	CDK8	1.55528e-107	14.3683	0.432	0.118	5.33911e-103
Ven.01.TSHZ2	NUTM2B-AS1	2.3825e-194	14.3441	0.424	0.019	8.17889e-190
Ven.01.TSHZ2	CCDC7	9.19758e-95	14.3407	0.39	0.106	3.15744e-90
Ven.01.TSHZ2	FMNL3	2.48256e-182	14.333	0.669	0.255	8.52237e-178
Ven.01.TSHZ2	CPEB2	8.47387e-82	14.2063	0.408	0.138	2.90899e-77
Ven.01.TSHZ2	UBR3	2.52127e-164	14.1889	0.656	0.251	8.65528e-160
Ven.01.TSHZ2	INPP4B	4.47604e-78	14.181	0.27	0.05	1.53658e-73
Ven.01.TSHZ2	STARD4	2.47081e-65	14.1796	0.395	0.155	8.48205e-61
Ven.01.TSHZ2	UBE2H	6.01662e-48	14.1303	0.564	0.367	2.06544e-43
Ven.01.TSHZ2	FEM1C	3.68756e-49	14.106	0.319	0.12	1.2659e-44
Ven.01.TSHZ2	AC083855.2	1.48554e-185	14.0982	0.393	0.012	5.0997e-181
Ven.01.TSHZ2	HNRNPU	1.90663e-32	14.0128	0.609	0.48	6.54528e-28
Ven.01.TSHZ2	ARHGAP21	1.65944e-66	13.9945	0.438	0.198	5.6967e-62
Ven.01.TSHZ2	MAP4K3	7.14086e-114	13.9742	0.683	0.37	2.45139e-109
Ven.01.TSHZ2	MAP4K5	8.72211e-120	13.9732	0.586	0.242	2.99421e-115
Ven.01.TSHZ2	ZDHHC21	7.62862e-112	13.9657	0.507	0.181	2.61883e-107
Ven.01.TSHZ2	DOCK6	2.11012e-189	13.9548	0.696	0.263	7.24384e-185
Ven.01.TSHZ2	SH3BP5	7.88123e-88	13.945	0.539	0.236	2.70555e-83
Ven.01.TSHZ2	UGGT2	1.49853e-157	13.93	0.541	0.152	5.14431e-153
Ven.01.TSHZ2	SNX29	2.62188e-172	13.9185	0.608	0.189	9.00064e-168
Ven.01.TSHZ2	LRRFIP1	1.0504e-194	13.9077	0.725	0.287	3.60592e-190
Ven.01.TSHZ2	COP1	1.81281e-178	13.853	0.697	0.289	6.22321e-174
Ven.01.TSHZ2	KLF6	1.34971e-06	13.8481	0.582	0.675	0.0463343
Ven.01.TSHZ2	RNF115	2.30001e-17	13.7981	0.594	0.486	7.89572e-13
Ven.01.TSHZ2	PMAIP1	1.38106e-79	13.7873	0.037	0.258	4.74104e-75
Ven.01.TSHZ2	DEPTOR	2.85196e-63	13.7817	0.414	0.181	9.7905e-59
Ven.01.TSHZ2	ARID2	4.64832e-118	13.7708	0.604	0.259	1.59572e-113
Ven.01.TSHZ2	AP3S1	1.45435e-179	13.6169	0.385	0.012	4.99264e-175
Ven.01.TSHZ2	DAB2IP	7.57251e-65	13.6133	0.533	0.28	2.59957e-60
Ven.01.TSHZ2	ETV6	1.9404e-160	13.5506	0.684	0.315	6.66121e-156
Ven.01.TSHZ2	NOTCH4	4.20816e-219	13.5445	0.799	0.41	1.44462e-214
Ven.01.TSHZ2	ODF2L	1.5322e-117	13.5324	0.614	0.284	5.2599e-113
Ven.01.TSHZ2	PHF14	2.79924e-132	13.5173	0.661	0.339	9.6095e-128
Ven.01.TSHZ2	RBMS2	1.52637e-98	13.4965	0.71	0.407	5.23987e-94
Ven.01.TSHZ2	ELK3	3.28771e-195	13.4842	0.732	0.305	1.12864e-190
Ven.01.TSHZ2	MGAT5	3.77789e-63	13.4742	0.548	0.312	1.29691e-58
Ven.01.TSHZ2	XYLT1	1.61491e-133	13.4148	0.356	0.041	5.54384e-129
Ven.01.TSHZ2	DCLK2	2.50182e-111	13.4056	0.509	0.174	8.5885e-107
Ven.01.TSHZ2	TSC22D2	3.37258e-34	13.3456	0.481	0.299	1.15777e-29
Ven.01.TSHZ2	SPRED2	2.03097e-93	13.329	0.588	0.29	6.97212e-89
Ven.01.TSHZ2	GSK3B	8.21708e-178	13.3263	0.724	0.344	2.82084e-173
Ven.01.TSHZ2	SMAD9	4.88459e-55	13.2837	0.489	0.253	1.67683e-50
Ven.01.TSHZ2	NID2	2.6482e-45	13.2713	0.266	0.093	9.091e-41
Ven.01.TSHZ2	CEP350	5.96347e-162	13.2209	0.686	0.308	2.0472e-157
Ven.01.TSHZ2	ZNF280D	1.32717e-150	13.154	0.603	0.22	4.55606e-146
Ven.01.TSHZ2	PRCP	0.000421127	13.1385	0.274	0.227	1
Ven.01.TSHZ2	DOCK1	2.76421e-215	13.1126	0.806	0.425	9.48925e-211
Ven.01.TSHZ2	STK17A	2.19919e-35	13.1038	0.284	0.123	7.5496e-31
Ven.01.TSHZ2	SERINC5	2.42899e-05	13.0968	0.401	0.45	0.833847
Ven.01.TSHZ2	GALNT10	5.90432e-74	13.0922	0.363	0.115	2.02689e-69
Ven.01.TSHZ2	RTN4	0.0513076	12.9914	0.526	0.522	1
Ven.01.TSHZ2	ATXN2	1.19162e-123	12.9816	0.623	0.267	4.09071e-119
Ven.01.TSHZ2	ADAMTS9-AS2	9.8834e-149	12.9664	0.334	0.013	3.39287e-144
Ven.01.TSHZ2	PPP2R5C	3.34401e-99	12.9548	0.523	0.211	1.14797e-94
Ven.01.TSHZ2	FNDC3A	9.89789e-113	12.938	0.595	0.281	3.39785e-108
Ven.01.TSHZ2	PHKB	6.84421e-149	12.9086	0.703	0.342	2.34955e-144
Ven.01.TSHZ2	SKAP2	2.17183e-30	12.8926	0.341	0.187	7.45569e-26
Ven.01.TSHZ2	TTC17	4.15044e-117	12.7856	0.603	0.271	1.4248e-112
Ven.01.TSHZ2	BCR	8.27571e-120	12.7823	0.529	0.178	2.84097e-115
Ven.01.TSHZ2	SUPT3H	2.52402e-63	12.7804	0.387	0.155	8.6647e-59
Ven.01.TSHZ2	RFX7	4.63745e-126	12.7722	0.508	0.151	1.59199e-121
Ven.01.TSHZ2	PLSCR1	2.21615e-16	12.701	0.508	0.4	7.60784e-12
Ven.01.TSHZ2	REV3L	1.15187e-126	12.6982	0.613	0.264	3.95424e-122
Ven.01.TSHZ2	FGD4	1.5706e-19	12.6563	0.428	0.31	5.39171e-15
Ven.01.TSHZ2	JARID2	1.67158e-110	12.6472	0.583	0.275	5.73837e-106
Ven.01.TSHZ2	LIMS2	2.00292e-39	12.5861	0.563	0.381	6.87582e-35
Ven.01.TSHZ2	ADARB1	7.89018e-173	12.5758	0.583	0.166	2.70862e-168
Ven.01.TSHZ2	USP12	1.72435e-99	12.572	0.519	0.207	5.91953e-95
Ven.01.TSHZ2	LARP1B	1.06435e-36	12.5695	0.253	0.097	3.65379e-32
Ven.01.TSHZ2	RFTN2	2.3336e-63	12.5519	0.501	0.255	8.01101e-59
Ven.01.TSHZ2	DDX60	9.58886e-25	12.528	0.306	0.169	3.29176e-20
Ven.01.TSHZ2	ANGPTL2	6.11962e-53	12.5134	0.292	0.095	2.10081e-48
Ven.01.TSHZ2	PHF3	8.23995e-77	12.5121	0.506	0.244	2.82869e-72
Ven.01.TSHZ2	LHFPL2	6.51078e-13	12.5055	0.282	0.187	2.23509e-08
Ven.01.TSHZ2	NEK7	5.28221e-86	12.504	0.545	0.264	1.81333e-81
Ven.01.TSHZ2	KAT6A	8.20721e-167	12.4537	0.737	0.349	2.81745e-162
Ven.01.TSHZ2	OPHN1	5.03243e-85	12.438	0.461	0.175	1.72758e-80
Ven.01.TSHZ2	PFKFB3	2.4367e-62	12.4268	0.295	0.084	8.36493e-58
Ven.01.TSHZ2	MMS22L	1.81219e-54	12.4159	0.251	0.067	6.22107e-50
Ven.01.TSHZ2	STRBP	5.30945e-108	12.4047	0.407	0.106	1.82268e-103
Ven.01.TSHZ2	TUSC3	3.40218e-31	12.3752	0.27	0.123	1.16794e-26
Ven.01.TSHZ2	SLC30A7	3.54051e-121	12.3752	0.544	0.198	1.21542e-116
Ven.01.TSHZ2	NID1	1.53915e-137	12.3376	0.579	0.213	5.28376e-133
Ven.01.TSHZ2	PTBP2	1.05871e-194	12.3148	0.701	0.28	3.63446e-190
Ven.01.TSHZ2	RALA	1.44557e-42	12.2831	0.43	0.234	4.96249e-38
Ven.01.TSHZ2	TNFRSF10B	5.36603e-34	12.2732	0.363	0.184	1.8421e-29
Ven.01.TSHZ2	DMTF1	1.5208e-152	12.2631	0.583	0.192	5.22077e-148
Ven.01.TSHZ2	TTLL5	3.95089e-184	12.2212	0.61	0.172	1.3563e-179
Ven.01.TSHZ2	FTO	2.7751e-165	12.2102	0.679	0.287	9.52665e-161
Ven.01.TSHZ2	ATP11B	5.73438e-62	12.1756	0.472	0.222	1.96856e-57
Ven.01.TSHZ2	GRASP	1.15773e-136	12.124	0.326	0.018	3.97439e-132
Ven.01.TSHZ2	GPATCH2	3.98479e-136	12.0895	0.481	0.122	1.36794e-131
Ven.01.TSHZ2	RPS6KA3	2.57041e-34	12.0783	0.518	0.337	8.82398e-30
Ven.01.TSHZ2	KIAA1671	1.257e-112	12.0743	0.486	0.16	4.31517e-108
Ven.01.TSHZ2	SHROOM2	8.59628e-63	12.0468	0.401	0.159	2.95102e-58
Ven.01.TSHZ2	ZFAND3	6.18486e-171	12.0426	0.786	0.481	2.1232e-166
Ven.01.TSHZ2	HIP1	8.72445e-74	12.0151	0.542	0.27	2.99502e-69
Ven.01.TSHZ2	SIK3	8.65028e-137	12.0085	0.685	0.315	2.96956e-132
Ven.01.TSHZ2	GIMAP8	3.59243e-87	11.9936	0.492	0.198	1.23325e-82
Ven.01.TSHZ2	BTBD9	3.27684e-161	11.9827	0.642	0.251	1.12491e-156
Ven.01.TSHZ2	PPP2R2A	8.27392e-104	11.9546	0.639	0.331	2.84035e-99
Ven.01.TSHZ2	IFI16	5.3049e-19	11.9216	0.607	0.486	1.82112e-14
Ven.01.TSHZ2	LRRC8B	5.24996e-42	11.8923	0.295	0.121	1.80226e-37
Ven.01.TSHZ2	USP25	6.70577e-105	11.8897	0.486	0.168	2.30202e-100
Ven.01.TSHZ2	FAM49B	9.30871e-149	11.8808	0.342	0.017	3.19559e-144
Ven.01.TSHZ2	IFI44L	1.10846e-07	11.8457	0.318	0.419	0.00380522
Ven.01.TSHZ2	SWAP70	1.16366e-150	11.843	0.737	0.378	3.99474e-146
Ven.01.TSHZ2	ZNF638	1.83675e-186	11.83	0.766	0.394	6.3054e-182
Ven.01.TSHZ2	STXBP5	4.78674e-149	11.8154	0.575	0.185	1.64324e-144
Ven.01.TSHZ2	RAD51B	3.82242e-81	11.8113	0.522	0.253	1.3122e-76
Ven.01.TSHZ2	JPX	9.16963e-116	11.7936	0.643	0.317	3.14784e-111
Ven.01.TSHZ2	ANO6	2.39894e-134	11.7888	0.607	0.238	8.23533e-130
Ven.01.TSHZ2	CRY1	1.15722e-05	11.7541	0.282	0.22	0.39726
Ven.01.TSHZ2	MGMT	7.01755e-47	11.738	0.459	0.263	2.40905e-42
Ven.01.TSHZ2	HMGN1	3.59385e-05	11.7343	0.354	0.414	1
Ven.01.TSHZ2	VPS37A	9.34932e-83	11.7162	0.381	0.116	3.20953e-78
Ven.01.TSHZ2	HIVEP3	1.42914e-55	11.716	0.302	0.104	4.90611e-51
Ven.01.TSHZ2	ATP10D	1.25258e-109	11.7047	0.501	0.17	4.29997e-105
Ven.01.TSHZ2	SGMS1	2.78408e-43	11.7029	0.622	0.42	9.55745e-39
Ven.01.TSHZ2	XKR6	1.81097e-85	11.6765	0.423	0.154	6.21689e-81
Ven.01.TSHZ2	CHD9	8.6365e-175	11.6447	0.755	0.382	2.96482e-170
Ven.01.TSHZ2	FAP	1.20819e-175	11.6311	0.453	0.054	4.14759e-171
Ven.01.TSHZ2	MMP16	1.44015e-69	11.6311	0.259	0.055	4.94388e-65
Ven.01.TSHZ2	FGFR1	2.15281e-26	11.6297	0.326	0.174	7.39038e-22
Ven.01.TSHZ2	ARHGAP5	9.67187e-106	11.6146	0.489	0.172	3.32026e-101
Ven.01.TSHZ2	PTPN1	1.66907e-53	11.6111	0.424	0.2	5.72976e-49
Ven.01.TSHZ2	THBD	8.14678e-20	11.5777	0.254	0.133	2.79671e-15
Ven.01.TSHZ2	PIP5K1C	2.88168e-66	11.5589	0.403	0.154	9.89252e-62
Ven.01.TSHZ2	CASP10	1.66526e-60	11.5537	0.402	0.164	5.71667e-56
Ven.01.TSHZ2	WWC2	5.97857e-92	11.5398	0.609	0.317	2.05238e-87
Ven.01.TSHZ2	DYM	1.24901e-106	11.5259	0.563	0.243	4.28774e-102
Ven.01.TSHZ2	ELF2	1.30745e-167	11.5122	0.752	0.374	4.48834e-163
Ven.01.TSHZ2	PIK3R1	1.46107e-131	11.4925	0.536	0.178	5.01572e-127
Ven.01.TSHZ2	GALK2	4.85657e-107	11.4847	0.46	0.142	1.66721e-102
Ven.01.TSHZ2	SPIRE1	2.96595e-118	11.4719	0.46	0.128	1.01818e-113
Ven.01.TSHZ2	MX1	9.96833e-24	11.4413	0.165	0.308	3.42203e-19
Ven.01.TSHZ2	AC079380.1	1.51432e-122	11.4304	0.267	0.005	5.1985e-118
Ven.01.TSHZ2	SPATA5	2.0721e-140	11.3943	0.508	0.135	7.11332e-136
Ven.01.TSHZ2	MTAP	1.45717e-81	11.3792	0.423	0.16	5.00231e-77
Ven.01.TSHZ2	SENP7	1.99483e-145	11.3766	0.657	0.28	6.84804e-141
Ven.01.TSHZ2	MTHFD1L	9.48635e-86	11.3652	0.395	0.128	3.25657e-81
Ven.01.TSHZ2	CREM	4.09991e-09	11.3375	0.41	0.327	0.000140746
Ven.01.TSHZ2	FAM53B	5.20298e-76	11.3331	0.368	0.115	1.78613e-71
Ven.01.TSHZ2	CAMKMT	7.34064e-92	11.3301	0.504	0.206	2.51997e-87
Ven.01.TSHZ2	USP33	1.51582e-74	11.2736	0.471	0.201	5.20367e-70
Ven.01.TSHZ2	DIP2C	3.19035e-52	11.2663	0.388	0.179	1.09522e-47
Ven.01.TSHZ2	PTPN4	6.12899e-132	11.2326	0.543	0.185	2.10402e-127
Ven.01.TSHZ2	TBC1D22A	1.28732e-178	11.1916	0.728	0.311	4.41925e-174
Ven.01.TSHZ2	BICD1	1.00012e-120	11.1752	0.644	0.286	3.43332e-116
Ven.01.TSHZ2	CTNNA1	1.49527e-124	11.1742	0.746	0.466	5.13313e-120
Ven.01.TSHZ2	KDM6A	1.76024e-146	11.1674	0.683	0.32	6.04271e-142
Ven.01.TSHZ2	PCNX4	1.50729e-126	11.1463	0.5	0.153	5.17438e-122
Ven.01.TSHZ2	NCOA2	4.63347e-97	11.1462	0.541	0.246	1.59062e-92
Ven.01.TSHZ2	TBCK	3.97827e-149	11.1058	0.604	0.216	1.3657e-144
Ven.01.TSHZ2	PRDM1	3.64658e-26	11.1043	0.39	0.248	1.25184e-21
Ven.01.TSHZ2	RNF38	7.25128e-112	11.101	0.56	0.237	2.48929e-107
Ven.01.TSHZ2	MFAP3	4.85312e-106	11.0162	0.443	0.13	1.66603e-101
Ven.01.TSHZ2	ZMYND11	7.40411e-81	10.9892	0.491	0.218	2.54176e-76
Ven.01.TSHZ2	NPNT	8.17255e-68	10.9422	0.269	0.062	2.80556e-63
Ven.01.TSHZ2	SPNS2	1.19474e-74	10.9418	0.35	0.103	4.10142e-70
Ven.01.TSHZ2	EEA1	1.57871e-67	10.9266	0.466	0.208	5.41955e-63
Ven.01.TSHZ2	RPH3AL	2.14439e-60	10.9243	0.299	0.089	7.36149e-56
Ven.01.TSHZ2	TMEM243	3.5936e-09	10.9106	0.333	0.245	0.000123365
Ven.01.TSHZ2	VPS13A	1.53868e-135	10.8148	0.554	0.19	5.28212e-131
Ven.01.TSHZ2	GALNT1	7.90534e-92	10.8003	0.449	0.162	2.71382e-87
Ven.01.TSHZ2	PIBF1	2.32723e-125	10.7978	0.607	0.243	7.98916e-121
Ven.01.TSHZ2	ZNF704	1.58115e-12	10.7889	0.314	0.229	5.42794e-08
Ven.01.TSHZ2	PRRC2B	2.57417e-239	10.7854	0.495	0.021	8.83687e-235
Ven.01.TSHZ2	ANKRD10	8.61941e-131	10.7209	0.646	0.317	2.95896e-126
Ven.01.TSHZ2	POLA1	8.81514e-50	10.7107	0.279	0.094	3.02615e-45
Ven.01.TSHZ2	MAP4	3.50909e-61	10.6872	0.658	0.431	1.20463e-56
Ven.01.TSHZ2	SETD5	1.13853e-103	10.6858	0.678	0.399	3.90847e-99
Ven.01.TSHZ2	KIAA1109	2.79505e-265	10.6788	0.543	0.024	9.59511e-261
Ven.01.TSHZ2	GTF2I	9.53228e-90	10.6626	0.596	0.318	3.27234e-85
Ven.01.TSHZ2	CCNH	5.492e-41	10.6551	0.573	0.382	1.88535e-36
Ven.01.TSHZ2	ZNF75D	1.02854e-134	10.6465	0.422	0.08	3.53089e-130
Ven.01.TSHZ2	TMEM131L	1.39073e-146	10.6461	0.364	0.031	4.77425e-142
Ven.01.TSHZ2	ST8SIA6	0.101802	10.6358	0.227	0.256	1
Ven.01.TSHZ2	YAF2	5.21143e-82	10.6243	0.551	0.279	1.78903e-77
Ven.01.TSHZ2	BHLHE40	1.0059e-34	10.5919	0.391	0.215	3.45314e-30
Ven.01.TSHZ2	KLHL2	1.51664e-101	10.5911	0.453	0.142	5.20646e-97
Ven.01.TSHZ2	PBX3	9.1692e-94	10.5815	0.43	0.14	3.1477e-89
Ven.01.TSHZ2	ANKRD50	2.21491e-152	10.558	0.435	0.069	7.60356e-148
Ven.01.TSHZ2	DGKI	1.04391e-110	10.5539	0.418	0.105	3.58365e-106
Ven.01.TSHZ2	KMT2A	7.83466e-87	10.5322	0.543	0.248	2.68956e-82
Ven.01.TSHZ2	CBL	1.10256e-142	10.5262	0.496	0.12	3.78496e-138
Ven.01.TSHZ2	AHCTF1	7.35192e-109	10.5097	0.492	0.164	2.52384e-104
Ven.01.TSHZ2	POC1B	1.30705e-92	10.5041	0.384	0.103	4.48696e-88
Ven.01.TSHZ2	RAP1A	1.05349e-72	10.4904	0.638	0.405	3.61653e-68
Ven.01.TSHZ2	SEPTIN9	2.11997e-39	10.4296	0.416	0.231	7.27766e-35
Ven.01.TSHZ2	LENG8	3.92627e-128	10.4149	0.477	0.118	1.34785e-123
Ven.01.TSHZ2	ATG7	2.33685e-182	10.4116	0.639	0.208	8.02217e-178
Ven.01.TSHZ2	RIN3	4.42503e-185	10.4008	0.506	0.081	1.51907e-180
Ven.01.TSHZ2	TTC19	3.09718e-60	10.3958	0.503	0.264	1.06323e-55
Ven.01.TSHZ2	CDHR3	2.45068e-125	10.3931	0.33	0.032	8.41295e-121
Ven.01.TSHZ2	F2RL3	5.37053e-67	10.3822	0.255	0.053	1.84365e-62
Ven.01.TSHZ2	SPATS2L	6.57829e-15	10.3368	0.366	0.262	2.25826e-10
Ven.01.TSHZ2	GRAMD2B	3.42302e-71	10.3302	0.315	0.086	1.17509e-66
Ven.01.TSHZ2	PPARD	1.01001e-17	10.284	0.254	0.371	3.46727e-13
Ven.01.TSHZ2	ESYT2	0.686351	10.2605	0.641	0.596	1
Ven.01.TSHZ2	SLC10A7	1.2214e-139	10.2492	0.484	0.122	4.19296e-135
Ven.01.TSHZ2	COMMD10	6.07304e-154	10.2102	0.657	0.286	2.08481e-149
Ven.01.TSHZ2	SMARCA2	1.89199e-73	10.197	0.711	0.472	6.49503e-69
Ven.01.TSHZ2	CASK	1.57633e-104	10.1958	0.477	0.166	5.4114e-100
Ven.01.TSHZ2	SPAG9	5.71438e-39	10.1864	0.561	0.38	1.96169e-34
Ven.01.TSHZ2	ASAP2	3.7993e-190	10.1855	0.637	0.183	1.30426e-185
Ven.01.TSHZ2	CCNL1	9.79421e-10	10.1841	0.619	0.506	3.36225e-05
Ven.01.TSHZ2	ELF1	9.86586e-18	10.1806	0.616	0.491	3.38685e-13
Ven.01.TSHZ2	RBFOX2	1.45073e-204	10.1557	0.811	0.433	4.98022e-200
Ven.01.TSHZ2	PACSIN2	7.70587e-37	10.1536	0.428	0.248	2.64535e-32
Ven.01.TSHZ2	SMAD2	1.64684e-114	10.1439	0.561	0.225	5.65343e-110
Ven.01.TSHZ2	SH3PXD2A	1.13186e-158	10.1349	0.451	0.074	3.88556e-154
Ven.01.TSHZ2	AGPS	1.94597e-78	10.1315	0.406	0.143	6.6803e-74
Ven.01.TSHZ2	ZNF33A	3.03349e-54	10.111	0.377	0.163	1.04137e-49
Ven.01.TSHZ2	CARD8	8.11227e-179	10.0638	0.67	0.256	2.78486e-174
Ven.01.TSHZ2	INPP5A	1.05071e-154	10.0615	0.526	0.131	3.60699e-150
Ven.01.TSHZ2	MAP2K1	1.8106e-116	10.0403	0.494	0.154	6.2156e-112
Ven.01.TSHZ2	WDR7	1.48012e-135	10.0391	0.559	0.185	5.0811e-131
Ven.01.TSHZ2	CAMSAP2	2.72874e-91	10.0356	0.567	0.27	9.36749e-87
Ven.01.TSHZ2	MOB3B	6.44107e-30	9.99801	0.126	0.273	2.21115e-25
Ven.01.TSHZ2	MLEC	2.0028e-18	9.98335	0.538	0.399	6.87541e-14
Ven.01.TSHZ2	TRIM24	5.14307e-123	9.97332	0.455	0.121	1.76556e-118
Ven.01.TSHZ2	ZMYM2	2.44609e-183	9.9436	0.685	0.257	8.3972e-179
Ven.01.TSHZ2	MGLL	0.350544	9.93988	0.353	0.351	1
Ven.01.TSHZ2	SLC2A1	2.80284e-100	9.92873	0.173	0.499	9.62188e-96
Ven.01.TSHZ2	CCDC85A	1.05087e-12	9.91644	0.373	0.287	3.60752e-08
Ven.01.TSHZ2	SMAP1	8.53838e-40	9.88142	0.42	0.235	2.93114e-35
Ven.01.TSHZ2	CDC42BPB	3.3306e-168	9.87231	0.664	0.259	1.14336e-163
Ven.01.TSHZ2	CTBP2	5.99219e-53	9.87106	0.587	0.378	2.05706e-48
Ven.01.TSHZ2	DIXDC1	1.30105e-74	9.84979	0.328	0.09	4.46639e-70
Ven.01.TSHZ2	PPIP5K2	1.65982e-105	9.8375	0.47	0.15	5.69799e-101
Ven.01.TSHZ2	ROBO4	2.67907e-60	9.8195	0.627	0.41	9.19699e-56
Ven.01.TSHZ2	RNF4	8.84619e-71	9.81441	0.346	0.105	3.03681e-66
Ven.01.TSHZ2	WDPCP	2.48297e-98	9.79331	0.475	0.175	8.52379e-94
Ven.01.TSHZ2	TENT2	4.23707e-118	9.78471	0.599	0.248	1.45454e-113
Ven.01.TSHZ2	CORO1C	4.25992e-27	9.77417	0.349	0.2	1.46239e-22
Ven.01.TSHZ2	MAPK8	2.67408e-137	9.77318	0.601	0.238	9.17986e-133
Ven.01.TSHZ2	LIMD1	1.7979e-144	9.76974	0.424	0.069	6.17201e-140
Ven.01.TSHZ2	CXCL12	2.78199e-18	9.76778	0.329	0.209	9.5503e-14
Ven.01.TSHZ2	CRYBG3	5.07983e-110	9.76095	0.515	0.184	1.74386e-105
Ven.01.TSHZ2	ZNF644	4.0283e-81	9.76083	0.566	0.311	1.38287e-76
Ven.01.TSHZ2	APPL2	1.1103e-123	9.73131	0.477	0.132	3.81156e-119
Ven.01.TSHZ2	TSPAN14	3.00802e-102	9.72647	0.654	0.345	1.03262e-97
Ven.01.TSHZ2	ZC3H12C	2.50027e-121	9.72301	0.4	0.081	8.58319e-117
Ven.01.TSHZ2	ZHX2	1.23383e-52	9.709	0.365	0.158	4.23562e-48
Ven.01.TSHZ2	CAPZA2	0.000843011	9.68875	0.511	0.471	1
Ven.01.TSHZ2	SCAF8	4.81707e-98	9.68151	0.532	0.222	1.65365e-93
Ven.01.TSHZ2	SPG7	2.52022e-146	9.65089	0.611	0.224	8.65167e-142
Ven.01.TSHZ2	C20orf194	9.97655e-238	9.61285	0.49	0.018	3.42485e-233
Ven.01.TSHZ2	ADAMTSL2	2.16449e-97	9.60583	0.37	0.088	7.43049e-93
Ven.01.TSHZ2	CPD	1.02067e-11	9.60429	0.505	0.402	3.50387e-07
Ven.01.TSHZ2	PDS5B	7.0056e-110	9.58404	0.597	0.268	2.40495e-105
Ven.01.TSHZ2	TNFRSF10D	1.07054e-14	9.58082	0.484	0.333	3.67504e-10
Ven.01.TSHZ2	RBM33	6.85701e-123	9.57902	0.56	0.212	2.35394e-118
Ven.01.TSHZ2	KTN1	5.72551e-11	9.57114	0.665	0.608	1.96551e-06
Ven.01.TSHZ2	ME3	1.35404e-101	9.53373	0.469	0.158	4.64829e-97
Ven.01.TSHZ2	PCM1	9.39491e-125	9.51277	0.677	0.344	3.22518e-120
Ven.01.TSHZ2	MIR29B2CHG	2.37674e-83	9.50452	0.456	0.17	8.1591e-79
Ven.01.TSHZ2	ZNF827	6.82985e-115	9.48812	0.316	0.035	2.34462e-110
Ven.01.TSHZ2	SEC31A	2.14011e-68	9.47294	0.514	0.27	7.34679e-64
Ven.01.TSHZ2	AVL9	1.71827e-127	9.41442	0.552	0.193	5.89864e-123
Ven.01.TSHZ2	ZNF189	9.02147e-119	9.36215	0.363	0.059	3.09698e-114
Ven.01.TSHZ2	ELMSAN1	2.93721e-106	9.36155	0.25	0.01	1.00832e-101
Ven.01.TSHZ2	RICTOR	4.52511e-95	9.35599	0.589	0.289	1.55342e-90
Ven.01.TSHZ2	GULP1	4.08602e-34	9.33933	0.309	0.147	1.40269e-29
Ven.01.TSHZ2	ZMYM4	2.34244e-121	9.33416	0.584	0.242	8.04138e-117
Ven.01.TSHZ2	YES1	6.47703e-91	9.33179	0.708	0.433	2.2235e-86
Ven.01.TSHZ2	PAN3	4.00074e-182	9.31628	0.707	0.288	1.37342e-177
Ven.01.TSHZ2	PRKDC	4.05752e-57	9.30826	0.496	0.27	1.3929e-52
Ven.01.TSHZ2	ICA1	2.12056e-130	9.30795	0.656	0.306	7.27966e-126
Ven.01.TSHZ2	REEP3	2.35832e-60	9.29832	0.61	0.389	8.09588e-56
Ven.01.TSHZ2	TM9SF3	1.04848e-49	9.29824	0.565	0.359	3.59931e-45
Ven.01.TSHZ2	HS2ST1	2.56955e-111	9.28007	0.441	0.123	8.82101e-107
Ven.01.TSHZ2	PCCA	7.70405e-141	9.27654	0.747	0.386	2.64472e-136
Ven.01.TSHZ2	MAPRE2	1.87113e-82	9.27165	0.41	0.141	6.42339e-78
Ven.01.TSHZ2	CRADD	1.13369e-59	9.26643	0.418	0.188	3.89184e-55
Ven.01.TSHZ2	TAL1	9.43481e-46	9.19432	0.254	0.082	3.23888e-41
Ven.01.TSHZ2	SNX13	1.31938e-139	9.17912	0.599	0.232	4.52931e-135
Ven.01.TSHZ2	KDM4C	3.76605e-71	9.15848	0.46	0.203	1.29285e-66
Ven.01.TSHZ2	HIF3A	0.0446775	9.0759	0.28	0.255	1
Ven.01.TSHZ2	ROCK1	3.25843e-86	9.03004	0.62	0.345	1.11859e-81
Ven.01.TSHZ2	ANKRD17	1.2175e-148	9.00541	0.732	0.417	4.17955e-144
Ven.01.TSHZ2	NLRC5	5.78005e-64	9.00275	0.351	0.119	1.98423e-59
Ven.01.TSHZ2	YEATS2	8.92797e-175	8.98398	0.587	0.166	3.06488e-170
Ven.01.TSHZ2	CEP170	1.00272e-195	8.96778	0.663	0.23	3.44224e-191
Ven.01.TSHZ2	SRBD1	2.2096e-66	8.96107	0.339	0.112	7.58533e-62
Ven.01.TSHZ2	SINHCAF	8.71116e-23	8.9573	0.251	0.127	2.99045e-18
Ven.01.TSHZ2	BPTF	9.335e-84	8.95527	0.651	0.388	3.20461e-79
Ven.01.TSHZ2	RAPH1	1.09248e-72	8.93859	0.505	0.247	3.75036e-68
Ven.01.TSHZ2	TMCC1	3.46973e-108	8.92676	0.528	0.213	1.19112e-103
Ven.01.TSHZ2	CNTLN	1.06916e-94	8.90699	0.506	0.197	3.67032e-90
Ven.01.TSHZ2	ASXL2	3.50199e-90	8.86725	0.446	0.157	1.2022e-85
Ven.01.TSHZ2	EPB41L2	5.58329e-79	8.86664	0.497	0.228	1.91669e-74
Ven.01.TSHZ2	WLS	3.68796e-27	8.86046	0.346	0.198	1.26604e-22
Ven.01.TSHZ2	EML4	7.45263e-67	8.84443	0.443	0.196	2.55841e-62
Ven.01.TSHZ2	ADIPOR2	3.52888e-51	8.839	0.697	0.514	1.21143e-46
Ven.01.TSHZ2	PHLDB2	5.15216e-15	8.83021	0.304	0.2	1.76868e-10
Ven.01.TSHZ2	WIPF1	7.16518e-104	8.82176	0.445	0.134	2.45973e-99
Ven.01.TSHZ2	BABAM2	4.37294e-67	8.80925	0.561	0.325	1.50119e-62
Ven.01.TSHZ2	MARCH6	1.94409e-196	8.8023	0.43	0.02	6.67388e-192
Ven.01.TSHZ2	PLXND1	6.94573e-202	8.79876	0.712	0.275	2.3844e-197
Ven.01.TSHZ2	AP3B1	2.60694e-259	8.7986	0.528	0.022	8.94937e-255
Ven.01.TSHZ2	LINC01473	1.81013e-112	8.75168	0.28	0.019	6.214e-108
Ven.01.TSHZ2	BCAS3	7.4998e-141	8.74625	0.749	0.405	2.57461e-136
Ven.01.TSHZ2	NR4A1	0.799821	8.74575	0.349	0.354	1
Ven.01.TSHZ2	RAB7A	0.328716	8.74566	0.48	0.509	1
Ven.01.TSHZ2	NCOR2	5.19785e-75	8.74459	0.447	0.179	1.78437e-70
Ven.01.TSHZ2	ARIH1	5.38473e-73	8.73938	0.641	0.381	1.84852e-68
Ven.01.TSHZ2	PPP1R12B	2.66595e-47	8.71933	0.336	0.142	9.15196e-43
Ven.01.TSHZ2	EHMT1	2.09276e-156	8.71774	0.645	0.252	7.18423e-152
Ven.01.TSHZ2	TLK2	8.49635e-121	8.70615	0.531	0.179	2.91671e-116
Ven.01.TSHZ2	DDX17	9.10381e-201	8.69443	0.87	0.59	3.12525e-196
Ven.01.TSHZ2	OTUD4	2.1836e-66	8.69257	0.393	0.151	7.49609e-62
Ven.01.TSHZ2	LBH	6.41448e-55	8.69087	0.365	0.146	2.20203e-50
Ven.01.TSHZ2	NDEL1	1.14612e-53	8.6791	0.395	0.168	3.93453e-49
Ven.01.TSHZ2	USP48	1.85482e-130	8.67459	0.553	0.187	6.36741e-126
Ven.01.TSHZ2	ULK4	2.49146e-134	8.66826	0.495	0.134	8.55292e-130
Ven.01.TSHZ2	DYNC2H1	5.54908e-103	8.62473	0.373	0.084	1.90495e-98
Ven.01.TSHZ2	MIPOL1	1.42715e-56	8.59694	0.278	0.083	4.89926e-52
Ven.01.TSHZ2	SAMD9L	4.17966e-25	8.59352	0.322	0.179	1.43484e-20
Ven.01.TSHZ2	RBM6	4.88441e-144	8.58783	0.709	0.332	1.67677e-139
Ven.01.TSHZ2	PTBP3	4.69316e-69	8.587	0.46	0.208	1.61112e-64
Ven.01.TSHZ2	RASSF3	5.36372e-56	8.58626	0.405	0.179	1.84131e-51
Ven.01.TSHZ2	ZNF131	5.27165e-48	8.58487	0.4	0.193	1.80971e-43
Ven.01.TSHZ2	TDRD3	1.02525e-94	8.58051	0.418	0.126	3.5196e-90
Ven.01.TSHZ2	DPH6	7.50112e-62	8.56541	0.35	0.128	2.57506e-57
Ven.01.TSHZ2	PSME4	9.43921e-91	8.52607	0.492	0.201	3.24039e-86
Ven.01.TSHZ2	CAB39	5.04896e-88	8.52158	0.468	0.179	1.73326e-83
Ven.01.TSHZ2	ECPAS	5.41071e-87	8.51527	0.485	0.191	1.85744e-82
Ven.01.TSHZ2	MCC	5.09063e-36	8.51307	0.543	0.351	1.74756e-31
Ven.01.TSHZ2	SULT1C4	1.65526e-11	8.50608	0.311	0.212	5.68234e-07
Ven.01.TSHZ2	ST6GAL1	0.30247	8.50261	0.556	0.54	1
Ven.01.TSHZ2	EVI5	4.75784e-118	8.48688	0.528	0.186	1.63332e-113
Ven.01.TSHZ2	STARD8	2.34155e-37	8.47935	0.319	0.144	8.03832e-33
Ven.01.TSHZ2	ZNF710	6.84263e-156	8.47246	0.402	0.044	2.34901e-151
Ven.01.TSHZ2	CPPED1	1.75213e-78	8.44978	0.324	0.082	6.0149e-74
Ven.01.TSHZ2	KMT2E	8.83837e-109	8.43148	0.76	0.495	3.03412e-104
Ven.01.TSHZ2	IER2	2.38406e-62	8.4251	0.431	0.645	8.18425e-58
Ven.01.TSHZ2	TOX2	1.3134e-63	8.41892	0.298	0.086	4.50878e-59
Ven.01.TSHZ2	EHBP1	5.15383e-98	8.40743	0.524	0.211	1.76926e-93
Ven.01.TSHZ2	ARID4B	1.3535e-112	8.40259	0.738	0.433	4.64645e-108
Ven.01.TSHZ2	WAC	7.57573e-97	8.38482	0.682	0.404	2.60067e-92
Ven.01.TSHZ2	ALG13	6.27468e-130	8.37967	0.601	0.245	2.15404e-125
Ven.01.TSHZ2	CAV1	2.16432e-56	8.36048	0.26	0.499	7.42989e-52
Ven.01.TSHZ2	SESTD1	3.12079e-19	8.33312	0.519	0.391	1.07134e-14
Ven.01.TSHZ2	METTL15	7.05598e-105	8.32918	0.512	0.194	2.42225e-100
Ven.01.TSHZ2	KIF1B	1.97581e-129	8.27428	0.619	0.272	6.78275e-125
Ven.01.TSHZ2	BAIAP2	2.07386e-06	8.2612	0.287	0.219	0.0711937
Ven.01.TSHZ2	TRAK1	2.07572e-102	8.25525	0.479	0.158	7.12575e-98
Ven.01.TSHZ2	SLK	1.89057e-32	8.25151	0.452	0.281	6.49014e-28
Ven.01.TSHZ2	ARHGAP25	3.28415e-80	8.24839	0.311	0.071	1.12742e-75
Ven.01.TSHZ2	USP34	1.36943e-168	8.23636	0.798	0.463	4.70112e-164
Ven.01.TSHZ2	CALCOCO2	1.64615e-15	8.22775	0.453	0.325	5.65107e-11
Ven.01.TSHZ2	GALNT15	0.00929851	8.22349	0.336	0.371	1
Ven.01.TSHZ2	MCPH1	3.06907e-121	8.22322	0.558	0.203	1.05358e-116
Ven.01.TSHZ2	GIGYF2	2.95694e-91	8.22002	0.533	0.234	1.01509e-86
Ven.01.TSHZ2	OLA1	2.11977e-28	8.21438	0.393	0.243	7.27694e-24
Ven.01.TSHZ2	SHC2	7.03555e-38	8.19751	0.382	0.194	2.41523e-33
Ven.01.TSHZ2	LRATD1	7.63487e-66	8.16171	0.383	0.146	2.62097e-61
Ven.01.TSHZ2	CHD2	9.00469e-82	8.15408	0.594	0.335	3.09122e-77
Ven.01.TSHZ2	PAPOLA	3.46763e-56	8.14856	0.575	0.354	1.1904e-51
Ven.01.TSHZ2	WDFY3	5.84582e-138	8.14457	0.688	0.324	2.00681e-133
Ven.01.TSHZ2	SERPINB6	0.0188689	8.1298	0.549	0.574	1
Ven.01.TSHZ2	BRWD1	1.03409e-110	8.12695	0.593	0.268	3.54991e-106
Ven.01.TSHZ2	MYCBP2	7.47129e-123	8.12444	0.659	0.324	2.56482e-118
Ven.01.TSHZ2	AL592183.1	1.87939e-169	8.08261	0.372	0.014	6.45176e-165
Ven.01.TSHZ2	AL359220.1	9.39448e-122	8.07729	0.27	0.006	3.22503e-117
Ven.01.TSHZ2	CERT1	9.89857e-53	8.04961	0.444	0.216	3.39808e-48
Ven.01.TSHZ2	B4GALT1	0.000205702	8.02921	0.337	0.283	1
Ven.01.TSHZ2	PNP	3.34888e-18	8.01977	0.347	0.212	1.14964e-13
Ven.01.TSHZ2	ZNF423	2.58111e-110	8.01679	0.446	0.123	8.8607e-106
Ven.01.TSHZ2	MARCH7	1.52468e-269	7.97496	0.544	0.021	5.23408e-265
Ven.01.TSHZ2	FRYL	5.24452e-139	7.96605	0.795	0.495	1.80039e-134
Ven.01.TSHZ2	CLASP2	1.14833e-91	7.9621	0.613	0.32	3.94211e-87
Ven.01.TSHZ2	ZDHHC20	2.95069e-104	7.9343	0.505	0.184	1.01294e-99
Ven.01.TSHZ2	KANSL1L	1.05288e-29	7.92585	0.37	0.208	3.61443e-25
Ven.01.TSHZ2	MON2	4.12408e-131	7.92578	0.613	0.248	1.41575e-126
Ven.01.TSHZ2	GBA2	4.34413e-98	7.91056	0.388	0.1	1.4913e-93
Ven.01.TSHZ2	TACC2	1.14734e-140	7.90317	0.412	0.064	3.93872e-136
Ven.01.TSHZ2	EGFR	7.5505e-14	7.89389	0.205	0.316	2.59201e-09
Ven.01.TSHZ2	RC3H2	1.39232e-149	7.85256	0.58	0.188	4.77971e-145
Ven.01.TSHZ2	XRN1	1.40123e-79	7.84926	0.545	0.272	4.81029e-75
Ven.01.TSHZ2	SMG1	6.17964e-136	7.84116	0.582	0.218	2.12141e-131
Ven.01.TSHZ2	HRH1	4.13781e-111	7.8391	0.342	0.053	1.42047e-106
Ven.01.TSHZ2	FAM120B	1.76613e-150	7.83386	0.619	0.221	6.06294e-146
Ven.01.TSHZ2	EPS15	3.08385e-117	7.81591	0.605	0.256	1.05865e-112
Ven.01.TSHZ2	FEZ2	3.16322e-08	7.81306	0.423	0.345	0.0010859
Ven.01.TSHZ2	KIAA0825	1.55717e-94	7.81076	0.337	0.07	5.34562e-90
Ven.01.TSHZ2	STAT3	1.44446e-28	7.78271	0.648	0.499	4.95869e-24
Ven.01.TSHZ2	RCSD1	6.72542e-18	7.7809	0.306	0.195	2.30877e-13
Ven.01.TSHZ2	USP31	2.99798e-59	7.77935	0.3	0.093	1.02918e-54
Ven.01.TSHZ2	WDR27	5.46299e-164	7.76861	0.519	0.113	1.87539e-159
Ven.01.TSHZ2	KCNN3	1.00593e-178	7.7499	0.493	0.078	3.45326e-174
Ven.01.TSHZ2	PUM2	3.98059e-124	7.74587	0.661	0.321	1.3665e-119
Ven.01.TSHZ2	STK24	3.01644e-40	7.7403	0.47	0.277	1.03551e-35
Ven.01.TSHZ2	RSF1	9.42699e-77	7.72443	0.614	0.361	3.23619e-72
Ven.01.TSHZ2	HNRNPDL	8.21248e-24	7.67997	0.649	0.507	2.81926e-19
Ven.01.TSHZ2	PUDP	1.02931e-72	7.65999	0.302	0.074	3.53353e-68
Ven.01.TSHZ2	AC080132.1	9.44164e-129	7.65836	0.282	0.006	3.24122e-124
Ven.01.TSHZ2	SYNE2	2.90199e-49	7.65415	0.682	0.49	9.96223e-45
Ven.01.TSHZ2	AHDC1	1.5673e-74	7.64288	0.362	0.112	5.38039e-70
Ven.01.TSHZ2	VPS54	7.7432e-130	7.64038	0.525	0.163	2.65816e-125
Ven.01.TSHZ2	KANSL1	1.96833e-198	7.60071	0.746	0.32	6.7571e-194
Ven.01.TSHZ2	SUSD6	4.18839e-196	7.57209	0.709	0.275	1.43783e-191
Ven.01.TSHZ2	UNC13B	5.2104e-146	7.57075	0.676	0.308	1.78868e-141
Ven.01.TSHZ2	RGS12	1.89519e-128	7.55959	0.462	0.113	6.50598e-124
Ven.01.TSHZ2	LARP4B	7.48588e-117	7.55615	0.56	0.217	2.56983e-112
Ven.01.TSHZ2	ATE1	1.83958e-128	7.55141	0.556	0.2	6.31508e-124
Ven.01.TSHZ2	STK39	8.65284e-29	7.54894	0.33	0.18	2.97043e-24
Ven.01.TSHZ2	FANCL	9.92057e-131	7.54576	0.485	0.133	3.40563e-126
Ven.01.TSHZ2	GIMAP5	1.74984e-20	7.54569	0.36	0.222	6.00703e-16
Ven.01.TSHZ2	TSPAN18	4.49879e-148	7.5425	0.45	0.083	1.54439e-143
Ven.01.TSHZ2	DCAF6	2.55688e-82	7.53467	0.472	0.199	8.7775e-78
Ven.01.TSHZ2	ARMH3	3.35836e-70	7.5308	0.395	0.142	1.15289e-65
Ven.01.TSHZ2	SRSF11	1.18505e-117	7.51641	0.766	0.502	4.06816e-113
Ven.01.TSHZ2	KCTD3	3.25111e-71	7.51494	0.427	0.167	1.11607e-66
Ven.01.TSHZ2	SLCO1A2	2.92705e-133	7.51106	0.067	0.415	1.00483e-128
Ven.01.TSHZ2	PREP	4.35279e-41	7.48571	0.289	0.117	1.49427e-36
Ven.01.TSHZ2	RNF217	5.97275e-138	7.48311	0.517	0.148	2.05038e-133
Ven.01.TSHZ2	F2R	1.91048e-64	7.47723	0.35	0.118	6.55848e-60
Ven.01.TSHZ2	FAM219A	8.26736e-149	7.472	0.508	0.124	2.8381e-144
Ven.01.TSHZ2	PVR	2.51634e-88	7.46745	0.387	0.11	8.63835e-84
Ven.01.TSHZ2	SFPQ	1.00098e-123	7.46151	0.755	0.454	3.43626e-119
Ven.01.TSHZ2	FOCAD	7.02102e-110	7.4376	0.549	0.222	2.41025e-105
Ven.01.TSHZ2	SRRM2	1.35978e-116	7.41691	0.745	0.501	4.66799e-112
Ven.01.TSHZ2	MAST2	3.93462e-41	7.40541	0.28	0.11	1.35072e-36
Ven.01.TSHZ2	HIBCH	2.44382e-71	7.40255	0.509	0.249	8.38938e-67
Ven.01.TSHZ2	ITGA10	2.4637e-74	7.39895	0.423	0.158	8.45765e-70
Ven.01.TSHZ2	RABEP1	1.93776e-72	7.39512	0.464	0.194	6.65212e-68
Ven.01.TSHZ2	SCARB1	6.66851e-10	7.37971	0.181	0.263	2.28923e-05
Ven.01.TSHZ2	SPATA6	9.99735e-121	7.37941	0.41	0.087	3.43199e-116
Ven.01.TSHZ2	ATP9B	1.84696e-146	7.37086	0.592	0.193	6.34044e-142
Ven.01.TSHZ2	LUZP1	4.63315e-70	7.35503	0.631	0.381	1.59051e-65
Ven.01.TSHZ2	ATP2A2	9.3702e-53	7.33435	0.441	0.218	3.2167e-48
Ven.01.TSHZ2	UMAD1	2.13464e-51	7.32054	0.334	0.132	7.32801e-47
Ven.01.TSHZ2	INVS	2.28642e-122	7.30544	0.528	0.178	7.84904e-118
Ven.01.TSHZ2	FGF12	2.77913e-98	7.30421	0.406	0.122	9.54047e-94
Ven.01.TSHZ2	FOXK1	9.59483e-73	7.29028	0.373	0.123	3.29381e-68
Ven.01.TSHZ2	SUMF1	8.18948e-27	7.27478	0.395	0.25	2.81137e-22
Ven.01.TSHZ2	SSH1	1.37826e-70	7.27138	0.534	0.258	4.73142e-66
Ven.01.TSHZ2	WTAP	0.000250648	7.26363	0.442	0.368	1
Ven.01.TSHZ2	PPP1CB	1.97659e-09	7.26256	0.467	0.388	6.78543e-05
Ven.01.TSHZ2	SPIN1	2.24392e-36	7.25984	0.367	0.195	7.70314e-32
Ven.01.TSHZ2	FAM168A	1.03539e-59	7.25912	0.347	0.127	3.55439e-55
Ven.01.TSHZ2	NXN	0.000537503	7.24301	0.413	0.37	1
Ven.01.TSHZ2	VPS53	1.15754e-141	7.23876	0.531	0.151	3.97373e-137
Ven.01.TSHZ2	NDST1	2.28499e-134	7.23316	0.548	0.178	7.84413e-130
Ven.01.TSHZ2	WASHC4	2.21424e-117	7.20866	0.535	0.196	7.60128e-113
Ven.01.TSHZ2	SIPA1L2	1.98462e-76	7.20462	0.612	0.362	6.81302e-72
Ven.01.TSHZ2	PRKACB	7.34452e-31	7.20459	0.426	0.268	2.5213e-26
Ven.01.TSHZ2	ALMS1	6.34931e-71	7.19637	0.337	0.1	2.17965e-66
Ven.01.TSHZ2	VTI1A	4.45657e-164	7.19357	0.711	0.322	1.5299e-159
Ven.01.TSHZ2	HDAC4	3.43099e-93	7.19238	0.437	0.144	1.17782e-88
Ven.01.TSHZ2	SCD5	4.38243e-39	7.18879	0.27	0.109	1.50444e-34
Ven.01.TSHZ2	SCYL2	2.91505e-57	7.18049	0.388	0.161	1.00071e-52
Ven.01.TSHZ2	RC3H1	1.27218e-97	7.18003	0.529	0.208	4.36727e-93
Ven.01.TSHZ2	PPA2	5.72255e-101	7.15763	0.528	0.211	1.96449e-96
Ven.01.TSHZ2	SETX	9.09784e-151	7.15125	0.684	0.296	3.1232e-146
Ven.01.TSHZ2	PON2	1.43692e-22	7.13701	0.748	0.632	4.93279e-18
Ven.01.TSHZ2	FGD5	5.77104e-144	7.13378	0.639	0.254	1.98114e-139
Ven.01.TSHZ2	CDK13	4.69576e-147	7.12516	0.644	0.249	1.61201e-142
Ven.01.TSHZ2	ACAP2	3.20553e-65	7.12488	0.632	0.394	1.10043e-60
Ven.01.TSHZ2	ZNF618	5.14217e-119	7.11606	0.416	0.092	1.76525e-114
Ven.01.TSHZ2	ARAP2	1.13437e-22	7.10523	0.296	0.165	3.89419e-18
Ven.01.TSHZ2	AMOTL1	1.66924e-85	7.10155	0.434	0.15	5.73035e-81
Ven.01.TSHZ2	MAP3K8	5.724e-20	7.09392	0.314	0.188	1.96499e-15
Ven.01.TSHZ2	ABL2	5.44431e-151	7.08962	0.636	0.246	1.86898e-146
Ven.01.TSHZ2	SLC2A13	2.30588e-74	7.08614	0.322	0.087	7.91584e-70
Ven.01.TSHZ2	TOP1	8.96964e-24	7.08464	0.544	0.405	3.07919e-19
Ven.01.TSHZ2	TTN-AS1	2.14e-174	7.06608	0.374	0.011	7.34641e-170
Ven.01.TSHZ2	AAK1	6.84075e-56	7.05721	0.531	0.292	2.34836e-51
Ven.01.TSHZ2	MICAL2	1.18315e-95	7.02072	0.278	0.033	4.06163e-91
Ven.01.TSHZ2	AC118549.1	1.81787e-193	7.00658	0.418	0.017	6.24057e-189
Ven.01.TSHZ2	SLC25A13	8.11078e-130	7.00364	0.512	0.159	2.78435e-125
Ven.01.TSHZ2	FBXO34	2.69237e-42	7.0028	0.366	0.172	9.24264e-38
Ven.01.TSHZ2	USP6NL	6.2583e-15	6.99975	0.524	0.415	2.14841e-10
Ven.01.TSHZ2	HUWE1	1.40179e-83	6.99943	0.529	0.258	4.81221e-79
Ven.01.TSHZ2	MIB1	2.62153e-67	6.99902	0.448	0.202	8.99946e-63
Ven.01.TSHZ2	CDC14B	6.5755e-25	6.96577	0.284	0.146	2.2573e-20
Ven.01.TSHZ2	ZNF516	1.90929e-118	6.9578	0.406	0.086	6.55441e-114
Ven.01.TSHZ2	NSD1	3.71752e-87	6.95125	0.533	0.243	1.27619e-82
Ven.01.TSHZ2	RHOBTB1	3.95746e-06	6.94427	0.356	0.286	0.135856
Ven.01.TSHZ2	UBE2J1	6.76919e-52	6.94153	0.499	0.276	2.3238e-47
Ven.01.TSHZ2	RSU1	1.71411e-70	6.93905	0.492	0.248	5.88436e-66
Ven.01.TSHZ2	DENND1B	1.76142e-63	6.925	0.329	0.111	6.04679e-59
Ven.01.TSHZ2	PTPRN2	1.23311e-24	6.92157	0.311	0.173	4.23313e-20
Ven.01.TSHZ2	CAMTA1	8.3755e-10	6.90513	0.613	0.553	2.87523e-05
Ven.01.TSHZ2	RBM26	1.05378e-121	6.90374	0.574	0.23	3.61753e-117
Ven.01.TSHZ2	PHF21A	1.86325e-107	6.90139	0.56	0.23	6.39635e-103
Ven.01.TSHZ2	ENTPD1-AS1	8.16984e-166	6.88774	0.364	0.013	2.80463e-161
Ven.01.TSHZ2	EFCAB13	1.63396e-71	6.87592	0.27	0.054	5.60922e-67
Ven.01.TSHZ2	KIAA2026	2.52124e-86	6.87072	0.508	0.228	8.65515e-82
Ven.01.TSHZ2	LCLAT1	6.17888e-129	6.86393	0.436	0.095	2.12115e-124
Ven.01.TSHZ2	PRH1	6.52397e-124	6.85949	0.386	0.069	2.23961e-119
Ven.01.TSHZ2	TMEM135	3.45463e-154	6.85247	0.556	0.16	1.18594e-149
Ven.01.TSHZ2	FARS2	2.63794e-107	6.83924	0.529	0.206	9.05578e-103
Ven.01.TSHZ2	TNPO1	1.06716e-92	6.81841	0.572	0.271	3.66344e-88
Ven.01.TSHZ2	COPB1	6.35202e-38	6.80615	0.406	0.221	2.18058e-33
Ven.01.TSHZ2	NBEAL1	2.55753e-83	6.791	0.523	0.241	8.77973e-79
Ven.01.TSHZ2	TMEM87B	4.14029e-38	6.79001	0.372	0.195	1.42132e-33
Ven.01.TSHZ2	CDYL	9.98296e-102	6.78923	0.523	0.21	3.42705e-97
Ven.01.TSHZ2	PTPRA	1.38649e-65	6.72034	0.487	0.241	4.75969e-61
Ven.01.TSHZ2	CBR4	2.83283e-89	6.71806	0.403	0.121	9.72482e-85
Ven.01.TSHZ2	TBC1D2B	1.37426e-126	6.71692	0.456	0.114	4.71771e-122
Ven.01.TSHZ2	TSPAN9	4.92753e-58	6.71274	0.54	0.296	1.69157e-53
Ven.01.TSHZ2	NT5DC1	1.88552e-13	6.70023	0.267	0.175	6.4728e-09
Ven.01.TSHZ2	RANBP9	7.83925e-58	6.69763	0.399	0.172	2.69114e-53
Ven.01.TSHZ2	SRGAP2	2.20778e-97	6.67748	0.698	0.392	7.5791e-93
Ven.01.TSHZ2	RFX8	3.61521e-115	6.6713	0.272	0.013	1.24106e-110
Ven.01.TSHZ2	ATF7	5.62294e-128	6.66998	0.56	0.199	1.9303e-123
Ven.01.TSHZ2	UBE2E1	7.3467e-118	6.66282	0.54	0.199	2.52205e-113
Ven.01.TSHZ2	CHD1	1.56459e-90	6.66261	0.529	0.231	5.37107e-86
Ven.01.TSHZ2	ZNF292	7.57064e-74	6.661	0.516	0.258	2.59892e-69
Ven.01.TSHZ2	TMEM30A	2.29179e-22	6.65106	0.39	0.26	7.86749e-18
Ven.01.TSHZ2	NUBPL	6.04539e-93	6.64513	0.368	0.093	2.07532e-88
Ven.01.TSHZ2	PTPN12	2.38887e-140	6.63134	0.745	0.442	8.20074e-136
Ven.01.TSHZ2	HDGFL3	5.09798e-52	6.63091	0.552	0.335	1.75008e-47
Ven.01.TSHZ2	RIC1	6.61407e-102	6.62189	0.505	0.189	2.27055e-97
Ven.01.TSHZ2	NFAT5	1.34697e-123	6.61095	0.688	0.358	4.624e-119
Ven.01.TSHZ2	SS18	1.27834e-88	6.57849	0.471	0.187	4.38842e-84
Ven.01.TSHZ2	MAP2K5	3.50124e-115	6.57356	0.531	0.188	1.20194e-110
Ven.01.TSHZ2	ARHGAP32	4.93309e-21	6.56962	0.258	0.141	1.69348e-16
Ven.01.TSHZ2	PPP6R3	4.67835e-97	6.55249	0.683	0.394	1.60603e-92
Ven.01.TSHZ2	SPECC1L	1.73891e-125	6.53404	0.55	0.195	5.9695e-121
Ven.01.TSHZ2	SUCLG2	1.40011e-96	6.52066	0.512	0.211	4.80644e-92
Ven.01.TSHZ2	PARVB	7.26465e-44	6.51143	0.536	0.326	2.49388e-39
Ven.01.TSHZ2	CHKA	0.00253866	6.50802	0.439	0.383	1
Ven.01.TSHZ2	PAWR	9.69034e-33	6.50335	0.371	0.205	3.3266e-28
Ven.01.TSHZ2	RSRP1	1.90616e-70	6.49568	0.667	0.416	6.54366e-66
Ven.01.TSHZ2	DIAPH1	1.65312e-63	6.48544	0.366	0.135	5.675e-59
Ven.01.TSHZ2	RSRC1	1.02821e-56	6.46373	0.43	0.209	3.52973e-52
Ven.01.TSHZ2	OSBPL1A	2.86222e-20	6.44605	0.314	0.189	9.82573e-16
Ven.01.TSHZ2	ZDHHC14	9.03775e-80	6.40779	0.43	0.16	3.10257e-75
Ven.01.TSHZ2	ATAD2B	4.50385e-130	6.39647	0.561	0.19	1.54613e-125
Ven.01.TSHZ2	RAB31	4.28345e-50	6.37438	0.322	0.125	1.47046e-45
Ven.01.TSHZ2	CUX1	6.16865e-46	6.37339	0.586	0.411	2.11764e-41
Ven.01.TSHZ2	IFNAR2	7.73274e-66	6.37334	0.609	0.35	2.65457e-61
Ven.01.TSHZ2	UBAP2	5.5404e-112	6.35816	0.496	0.169	1.90196e-107
Ven.01.TSHZ2	CBFB	1.80016e-78	6.34	0.428	0.157	6.17977e-74
Ven.01.TSHZ2	TRMT11	6.07995e-62	6.33072	0.366	0.139	2.08719e-57
Ven.01.TSHZ2	INTS6	1.04717e-63	6.32335	0.499	0.247	3.59481e-59
Ven.01.TSHZ2	SP100	7.31071e-47	6.31259	0.608	0.421	2.50969e-42
Ven.01.TSHZ2	ANO10	1.91206e-49	6.28392	0.443	0.23	6.5639e-45
Ven.01.TSHZ2	GNB4	2.93667e-38	6.28251	0.372	0.188	1.00813e-33
Ven.01.TSHZ2	PPM1D	7.39078e-43	6.27943	0.326	0.137	2.53718e-38
Ven.01.TSHZ2	R3HCC1L	7.79664e-89	6.2738	0.373	0.098	2.67651e-84
Ven.01.TSHZ2	TTC7B	8.58435e-115	6.25504	0.477	0.14	2.94692e-110
Ven.01.TSHZ2	MED13	6.51616e-121	6.25117	0.623	0.274	2.23693e-116
Ven.01.TSHZ2	AGO3	1.49647e-84	6.24746	0.51	0.219	5.13723e-80
Ven.01.TSHZ2	YWHAZ	3.4788e-08	6.23371	0.541	0.515	0.00119424
Ven.01.TSHZ2	GAB2	6.54962e-79	6.22945	0.357	0.106	2.24842e-74
Ven.01.TSHZ2	ARFGEF2	4.15542e-57	6.213	0.613	0.369	1.42651e-52
Ven.01.TSHZ2	CPQ	1.29318e-27	6.21116	0.316	0.173	4.43936e-23
Ven.01.TSHZ2	TAOK1	2.968e-85	6.19369	0.589	0.305	1.01889e-80
Ven.01.TSHZ2	MIRLET7BHG	1.03656e-98	6.18423	0.458	0.147	3.55841e-94
Ven.01.TSHZ2	IPO8	7.61488e-61	6.18396	0.31	0.097	2.61411e-56
Ven.01.TSHZ2	WDFY1	3.37136e-76	6.18381	0.627	0.346	1.15736e-71
Ven.01.TSHZ2	ASB3	3.17743e-82	6.1611	0.452	0.176	1.09078e-77
Ven.01.TSHZ2	DDIT4	1.86697e-23	6.15869	0.325	0.479	6.40913e-19
Ven.01.TSHZ2	HPCAL1	2.46094e-45	6.14582	0.469	0.274	8.44816e-41
Ven.01.TSHZ2	PUM1	1.63792e-92	6.14424	0.647	0.36	5.6228e-88
Ven.01.TSHZ2	MAP3K7	9.6955e-104	6.11008	0.446	0.141	3.32837e-99
Ven.01.TSHZ2	LUC7L2	1.19608e-71	6.11003	0.568	0.323	4.10601e-67
Ven.01.TSHZ2	CSNK1G1	3.62603e-116	6.10097	0.455	0.12	1.24478e-111
Ven.01.TSHZ2	WDR37	6.55095e-128	6.10063	0.505	0.147	2.24887e-123
Ven.01.TSHZ2	BCKDHB	8.95146e-41	6.0941	0.285	0.117	3.07295e-36
Ven.01.TSHZ2	TNRC18	4.16342e-41	6.09381	0.327	0.143	1.42926e-36
Ven.01.TSHZ2	WDR60	4.68591e-185	6.0915	0.4	0.015	1.60862e-180
Ven.01.TSHZ2	PPP2R5E	2.07146e-102	6.09133	0.544	0.22	7.11111e-98
Ven.01.TSHZ2	WDR26	8.91102e-104	6.08346	0.516	0.196	3.05906e-99
Ven.01.TSHZ2	BCAR3	8.36509e-84	6.08251	0.445	0.166	2.87165e-79
Ven.01.TSHZ2	KPNA3	5.30367e-76	6.08066	0.468	0.199	1.8207e-71
Ven.01.TSHZ2	ATF6	2.07279e-86	6.07559	0.546	0.257	7.11567e-82
Ven.01.TSHZ2	GNB1	6.9753e-64	6.07462	0.712	0.497	2.39455e-59
Ven.01.TSHZ2	ATF2	6.17664e-85	6.07434	0.521	0.231	2.12038e-80
Ven.01.TSHZ2	HDAC8	1.03762e-161	6.07115	0.63	0.232	3.56206e-157
Ven.01.TSHZ2	KPNA4	3.36486e-80	6.05586	0.516	0.248	1.15512e-75
Ven.01.TSHZ2	MPDZ	7.67972e-148	6.05332	0.639	0.255	2.63637e-143
Ven.01.TSHZ2	ST5	1.87672e-233	6.04618	0.468	0.011	6.4426e-229
Ven.01.TSHZ2	ZFYVE16	3.40412e-102	6.04599	0.547	0.237	1.1686e-97
Ven.01.TSHZ2	KATNAL1	4.763e-50	6.04293	0.26	0.079	1.63509e-45
Ven.01.TSHZ2	RABGAP1	1.58265e-149	6.03581	0.653	0.284	5.43308e-145
Ven.01.TSHZ2	MPZL1	9.29823e-24	6.02627	0.398	0.261	3.19199e-19
Ven.01.TSHZ2	PHIP	5.05123e-55	6.02345	0.501	0.283	1.73404e-50
Ven.01.TSHZ2	PAFAH1B1	5.982e-112	6.02179	0.668	0.351	2.05356e-107
Ven.01.TSHZ2	CCNT2	9.10891e-130	6.01889	0.487	0.136	3.127e-125
Ven.01.TSHZ2	AFTPH	1.82966e-59	6.01091	0.349	0.127	6.28104e-55
Ven.01.TSHZ2	WIPI1	2.64205e-23	5.98828	0.25	0.123	9.0699e-19
Ven.01.TSHZ2	PHTF2	5.08373e-85	5.98716	0.352	0.093	1.74519e-80
Ven.01.TSHZ2	UBE3C	9.14181e-108	5.96279	0.528	0.207	3.13829e-103
Ven.01.TSHZ2	NIPAL2	3.96597e-69	5.95971	0.319	0.09	1.36148e-64
Ven.01.TSHZ2	AGFG1	7.40377e-08	5.95546	0.489	0.423	0.00254164
Ven.01.TSHZ2	MPRIP	2.75948e-141	5.95284	0.654	0.281	9.47303e-137
Ven.01.TSHZ2	TM9SF2	9.70879e-14	5.93224	0.413	0.316	3.33293e-09
Ven.01.TSHZ2	RREB1	1.55808e-111	5.91566	0.523	0.185	5.34874e-107
Ven.01.TSHZ2	LCP2	1.10863e-66	5.91239	0.388	0.143	3.8058e-62
Ven.01.TSHZ2	TFDP2	7.45365e-28	5.90937	0.316	0.169	2.55876e-23
Ven.01.TSHZ2	NDUFA10	1.95421e-11	5.90404	0.326	0.228	6.70859e-07
Ven.01.TSHZ2	UXS1	4.8594e-12	5.88272	0.295	0.198	1.66818e-07
Ven.01.TSHZ2	COTL1	0.0224379	5.86032	0.252	0.219	1
Ven.01.TSHZ2	TIPARP	3.10038e-23	5.85793	0.202	0.345	1.06433e-18
Ven.01.TSHZ2	MCAM	3.37714e-98	5.85625	0.539	0.215	1.15934e-93
Ven.01.TSHZ2	SRSF7	8.40673e-05	5.85309	0.427	0.461	1
Ven.01.TSHZ2	SH3RF1	3.31035e-89	5.83341	0.344	0.083	1.13641e-84
Ven.01.TSHZ2	PIAS2	1.18009e-94	5.82672	0.523	0.219	4.05112e-90
Ven.01.TSHZ2	AFF4	3.67799e-60	5.81603	0.705	0.458	1.26262e-55
Ven.01.TSHZ2	FARP1	1.34734e-48	5.81478	0.403	0.196	4.62527e-44
Ven.01.TSHZ2	TBC1D8	1.16691e-58	5.79656	0.361	0.139	4.00588e-54
Ven.01.TSHZ2	DIP2B	1.39599e-125	5.78159	0.565	0.207	4.79228e-121
Ven.01.TSHZ2	SETD2	5.28292e-121	5.78052	0.614	0.268	1.81357e-116
Ven.01.TSHZ2	PLCG2	1.25438e-15	5.75788	0.402	0.266	4.30617e-11
Ven.01.TSHZ2	P4HA1	4.77453e-05	5.75482	0.313	0.252	1
Ven.01.TSHZ2	DLL4	2.82763e-72	5.7506	0.447	0.189	9.70696e-68
Ven.01.TSHZ2	BTBD10	2.40585e-134	5.73813	0.489	0.129	8.25905e-130
Ven.01.TSHZ2	SIPA1L3	8.91722e-128	5.7207	0.464	0.115	3.06119e-123
Ven.01.TSHZ2	KIF5B	0.0967637	5.71585	0.509	0.483	1
Ven.01.TSHZ2	ZNF148	1.32858e-104	5.71107	0.614	0.318	4.56089e-100
Ven.01.TSHZ2	DAP	1.74582e-17	5.70209	0.332	0.22	5.99321e-13
Ven.01.TSHZ2	DIP2A	6.66641e-69	5.66873	0.423	0.171	2.28851e-64
Ven.01.TSHZ2	LINC01184	1.19912e-143	5.66833	0.323	0.012	4.11647e-139
Ven.01.TSHZ2	OGT	1.85843e-175	5.66651	0.607	0.175	6.37981e-171
Ven.01.TSHZ2	FILIP1L	2.31364e-22	5.64786	0.272	0.145	7.9425e-18
Ven.01.TSHZ2	ACBD6	1.1479e-51	5.64603	0.428	0.213	3.94064e-47
Ven.01.TSHZ2	ANKIB1	2.36944e-81	5.62488	0.465	0.198	8.13406e-77
Ven.01.TSHZ2	NT5C2	9.76231e-78	5.61869	0.484	0.215	3.3513e-73
Ven.01.TSHZ2	USP3	1.05845e-96	5.61279	0.535	0.224	3.63355e-92
Ven.01.TSHZ2	ZFAND6	3.3634e-30	5.59144	0.461	0.303	1.15462e-25
Ven.01.TSHZ2	DDI2	3.36894e-100	5.58911	0.349	0.071	1.15652e-95
Ven.01.TSHZ2	RPAP2	9.63399e-84	5.58524	0.421	0.145	3.30725e-79
Ven.01.TSHZ2	FAR1	5.89227e-149	5.58005	0.636	0.24	2.02276e-144
Ven.01.TSHZ2	PDS5A	1.49805e-135	5.57293	0.635	0.267	5.14267e-131
Ven.01.TSHZ2	SENP6	3.13883e-90	5.55597	0.572	0.293	1.07753e-85
Ven.01.TSHZ2	ARL5A	1.92021e-23	5.54521	0.423	0.282	6.59189e-19
Ven.01.TSHZ2	FXR1	1.72724e-11	5.53687	0.378	0.288	5.92944e-07
Ven.01.TSHZ2	XRCC5	7.9273e-52	5.52929	0.605	0.401	2.72136e-47
Ven.01.TSHZ2	MAPK1	1.59986e-61	5.52367	0.436	0.201	5.49215e-57
Ven.01.TSHZ2	SPOCK2	3.38906e-53	5.52023	0.168	0.387	1.16343e-48
Ven.01.TSHZ2	USP47	1.01956e-100	5.51691	0.572	0.253	3.50006e-96
Ven.01.TSHZ2	TJP1	1.86338e-86	5.50815	0.85	0.628	6.3968e-82
Ven.01.TSHZ2	HNRNPC	4.79363e-24	5.46527	0.674	0.573	1.6456e-19
Ven.01.TSHZ2	SPTLC2	6.08362e-82	5.45598	0.461	0.178	2.08844e-77
Ven.01.TSHZ2	DAAM1	2.74676e-31	5.43639	0.304	0.153	9.42935e-27
Ven.01.TSHZ2	AEBP2	1.28516e-76	5.43485	0.387	0.133	4.41182e-72
Ven.01.TSHZ2	DOP1A	1.88202e-72	5.43319	0.375	0.129	6.46077e-68
Ven.01.TSHZ2	NCOR1	1.23627e-99	5.42701	0.661	0.373	4.24401e-95
Ven.01.TSHZ2	MNAT1	7.50104e-81	5.42518	0.516	0.241	2.57503e-76
Ven.01.TSHZ2	SNX14	1.67668e-127	5.42438	0.581	0.219	5.75588e-123
Ven.01.TSHZ2	RYK	1.31595e-59	5.41422	0.443	0.212	4.51752e-55
Ven.01.TSHZ2	ELP4	3.7983e-62	5.40244	0.417	0.183	1.30392e-57
Ven.01.TSHZ2	SF3B1	1.06555e-81	5.39132	0.658	0.399	3.65794e-77
Ven.01.TSHZ2	OSTF1	8.46296e-28	5.38733	0.403	0.241	2.90525e-23
Ven.01.TSHZ2	GPBP1L1	5.4788e-77	5.38552	0.52	0.245	1.88082e-72
Ven.01.TSHZ2	ZFC3H1	1.0506e-134	5.38417	0.529	0.154	3.60661e-130
Ven.01.TSHZ2	SEC24B	3.7239e-128	5.37723	0.594	0.228	1.27838e-123
Ven.01.TSHZ2	NHSL2	5.50664e-56	5.36922	0.334	0.123	1.89037e-51
Ven.01.TSHZ2	PXDN	5.20853e-117	5.35667	0.489	0.143	1.78804e-112
Ven.01.TSHZ2	POU2F1	1.75267e-75	5.33541	0.457	0.193	6.01674e-71
Ven.01.TSHZ2	NCALD	1.01848e-52	5.33374	0.473	0.261	3.49634e-48
Ven.01.TSHZ2	HERC4	2.31783e-185	5.32606	0.719	0.296	7.95689e-181
Ven.01.TSHZ2	SNX25	6.64097e-90	5.32519	0.385	0.106	2.27978e-85
Ven.01.TSHZ2	JAM3	9.56508e-110	5.31681	0.383	0.081	3.2836e-105
Ven.01.TSHZ2	SMURF1	7.09961e-110	5.31077	0.49	0.169	2.43722e-105
Ven.01.TSHZ2	SPC25	1.921e-12	5.30525	0.252	0.157	6.59459e-08
Ven.01.TSHZ2	TAF3	3.34674e-84	5.25697	0.439	0.156	1.1489e-79
Ven.01.TSHZ2	LINC01278	1.83168e-153	5.25628	0.351	0.017	6.28797e-149
Ven.01.TSHZ2	CPSF6	1.84337e-116	5.24897	0.54	0.203	6.32812e-112
Ven.01.TSHZ2	SLC35G2	1.97787e-102	5.23904	0.454	0.142	6.78982e-98
Ven.01.TSHZ2	ERICH1	1.24159e-95	5.22801	0.538	0.226	4.26224e-91
Ven.01.TSHZ2	UBE2E3	1.92043e-49	5.21339	0.489	0.29	6.59263e-45
Ven.01.TSHZ2	AP2B1	2.38963e-174	5.21295	0.385	0.015	8.20335e-170
Ven.01.TSHZ2	CERK	1.60532e-102	5.20153	0.484	0.164	5.51091e-98
Ven.01.TSHZ2	FNIP1	7.13339e-85	5.19474	0.557	0.271	2.44882e-80
Ven.01.TSHZ2	SON	1.08634e-62	5.19038	0.747	0.546	3.72931e-58
Ven.01.TSHZ2	ARHGAP12	1.40084e-49	5.17849	0.357	0.154	4.80894e-45
Ven.01.TSHZ2	IQGAP1	4.05419e-13	5.17564	0.574	0.498	1.39176e-08
Ven.01.TSHZ2	FBXO31	2.58585e-42	5.17472	0.292	0.114	8.87696e-38
Ven.01.TSHZ2	SH2D3C	1.30201e-115	5.16607	0.573	0.233	4.46966e-111
Ven.01.TSHZ2	YTHDF3	6.52851e-58	5.16472	0.432	0.203	2.24117e-53
Ven.01.TSHZ2	IRF2	1.18221e-41	5.16458	0.375	0.181	4.05842e-37
Ven.01.TSHZ2	LONP2	1.15854e-101	5.14907	0.541	0.226	3.97716e-97
Ven.01.TSHZ2	PRKD3	2.84813e-107	5.14805	0.604	0.278	9.77734e-103
Ven.01.TSHZ2	CLEC16A	1.40726e-96	5.14377	0.465	0.156	4.831e-92
Ven.01.TSHZ2	BMERB1	7.91708e-137	5.14327	0.415	0.071	2.71785e-132
Ven.01.TSHZ2	COPS8	3.29283e-09	5.14225	0.253	0.175	0.00011304
Ven.01.TSHZ2	ACVR2A	2.15895e-76	5.13642	0.357	0.109	7.41145e-72
Ven.01.TSHZ2	RAB3GAP1	5.08073e-95	5.12904	0.557	0.246	1.74416e-90
Ven.01.TSHZ2	MTMR10	2.89908e-70	5.12519	0.331	0.095	9.95227e-66
Ven.01.TSHZ2	EOGT	6.56521e-80	5.12355	0.498	0.218	2.25377e-75
Ven.01.TSHZ2	VPS13C	6.95867e-125	5.11429	0.656	0.307	2.38884e-120
Ven.01.TSHZ2	AVEN	4.24564e-58	5.11358	0.327	0.112	1.45749e-53
Ven.01.TSHZ2	YTHDC2	1.06482e-108	5.10301	0.497	0.17	3.65541e-104
Ven.01.TSHZ2	PITPNM2	1.33808e-86	5.10066	0.371	0.101	4.59349e-82
Ven.01.TSHZ2	KIFC3	6.83303e-80	5.10027	0.384	0.117	2.34571e-75
Ven.01.TSHZ2	CDC42SE2	1.26226e-70	5.08826	0.466	0.206	4.3332e-66
Ven.01.TSHZ2	C11orf49	4.04844e-153	5.08383	0.338	0.012	1.38979e-148
Ven.01.TSHZ2	AUH	6.4646e-52	5.08372	0.41	0.194	2.21923e-47
Ven.01.TSHZ2	H3F3A	6.22212e-134	5.07396	0.316	0.017	2.13599e-129
Ven.01.TSHZ2	NOTCH1	3.68649e-113	5.07182	0.577	0.236	1.26554e-108
Ven.01.TSHZ2	NAA16	7.51706e-84	5.07119	0.383	0.112	2.58053e-79
Ven.01.TSHZ2	PRKAA1	1.08008e-83	5.06711	0.46	0.179	3.70781e-79
Ven.01.TSHZ2	FBXL20	1.87091e-94	5.06517	0.471	0.165	6.42264e-90
Ven.01.TSHZ2	ETFA	2.03638e-42	5.05639	0.415	0.216	6.99069e-38
Ven.01.TSHZ2	HLCS	1.52436e-31	5.05336	0.336	0.179	5.23298e-27
Ven.01.TSHZ2	DUSP16	8.01038e-27	5.04875	0.292	0.154	2.74988e-22
Ven.01.TSHZ2	LAMA5	5.37194e-123	5.03353	0.517	0.16	1.84413e-118
Ven.01.TSHZ2	UBE2K	4.50658e-95	5.03182	0.632	0.331	1.54706e-90
Ven.01.TSHZ2	PITPNB	1.59693e-50	5.01971	0.477	0.263	5.48209e-46
Ven.01.TSHZ2	PIKFYVE	2.80252e-110	5.01766	0.474	0.147	9.62077e-106
Ven.01.TSHZ2	E2F3	2.88495e-89	5.01118	0.339	0.079	9.90374e-85
Ven.01.TSHZ2	CCDC91	1.25483e-75	5.0037	0.427	0.174	4.30771e-71
Ven.01.TSHZ2	EIF4G2	1.48654e-14	5.00187	0.647	0.56	5.10315e-10
Ven.01.TSHZ2	DICER1	1.5169e-95	4.99901	0.535	0.229	5.20737e-91
Ven.01.TSHZ2	ZNF438	6.65516e-61	4.99676	0.329	0.111	2.28465e-56
Ven.01.TSHZ2	ARSG	5.8167e-93	4.9918	0.387	0.103	1.99681e-88
Ven.01.TSHZ2	MIER1	5.60022e-49	4.99073	0.456	0.243	1.9225e-44
Ven.01.TSHZ2	ACER2	9.3384e-29	4.98485	0.279	0.131	3.20578e-24
Ven.01.TSHZ2	NIPBL	1.00615e-120	4.98235	0.683	0.374	3.454e-116
Ven.01.TSHZ2	DLGAP4	4.49273e-34	4.9776	0.359	0.184	1.54231e-29
Ven.01.TSHZ2	ANAPC10	1.97051e-68	4.97712	0.405	0.161	6.76456e-64
Ven.01.TSHZ2	ATP2B4	3.40388e-71	4.96886	0.446	0.186	1.16852e-66
Ven.01.TSHZ2	TMEM164	7.98376e-80	4.9654	0.289	0.056	2.74074e-75
Ven.01.TSHZ2	GIT2	3.24465e-172	4.95566	0.572	0.149	1.11386e-167
Ven.01.TSHZ2	CUL4B	1.16771e-52	4.94641	0.331	0.127	4.00862e-48
Ven.01.TSHZ2	NLRP1	2.61139e-90	4.9425	0.466	0.168	8.96465e-86
Ven.01.TSHZ2	GPHN	1.4999e-137	4.92831	0.663	0.295	5.149e-133
Ven.01.TSHZ2	TOGARAM1	4.25247e-69	4.92745	0.335	0.099	1.45983e-64
Ven.01.TSHZ2	RUNDC3B	0.500488	4.92582	0.589	0.588	1
Ven.01.TSHZ2	SAMHD1	4.41289e-15	4.91663	0.26	0.157	1.5149e-10
Ven.01.TSHZ2	RAB2A	3.35448e-21	4.91191	0.555	0.463	1.15156e-16
Ven.01.TSHZ2	MFSD4B	2.04051e-48	4.90199	0.28	0.096	7.00486e-44
Ven.01.TSHZ2	SREK1	4.14722e-96	4.90178	0.554	0.241	1.4237e-91
Ven.01.TSHZ2	RALB	4.85864e-30	4.90101	0.385	0.213	1.66792e-25
Ven.01.TSHZ2	TRIP12	1.37186e-161	4.89788	0.732	0.369	4.70944e-157
Ven.01.TSHZ2	SMG6	3.85871e-99	4.89164	0.521	0.206	1.32466e-94
Ven.01.TSHZ2	VGLL4	1.39478e-126	4.88196	0.652	0.308	4.78814e-122
Ven.01.TSHZ2	MYH10	8.60889e-38	4.88185	0.373	0.193	2.95535e-33
Ven.01.TSHZ2	NIN	2.33188e-79	4.86951	0.451	0.175	8.00512e-75
Ven.01.TSHZ2	GMDS-DT	1.23887e-35	4.86234	0.412	0.236	4.2529e-31
Ven.01.TSHZ2	CDK19	5.64134e-32	4.86221	0.291	0.139	1.93662e-27
Ven.01.TSHZ2	KIAA1328	2.20528e-32	4.86114	0.298	0.145	7.57052e-28
Ven.01.TSHZ2	ATG10	1.19048e-52	4.85926	0.356	0.151	4.08681e-48
Ven.01.TSHZ2	EXOC3L2	3.83191e-147	4.85701	0.385	0.04	1.31546e-142
Ven.01.TSHZ2	CASD1	7.23232e-64	4.85553	0.377	0.143	2.48278e-59
Ven.01.TSHZ2	FBXW11	1.08479e-139	4.85358	0.592	0.215	3.72399e-135
Ven.01.TSHZ2	SP3	7.38582e-57	4.85027	0.407	0.183	2.53548e-52
Ven.01.TSHZ2	MAP3K2	8.55538e-78	4.84756	0.504	0.234	2.93697e-73
Ven.01.TSHZ2	NSMCE2	3.00256e-94	4.84033	0.565	0.282	1.03075e-89
Ven.01.TSHZ2	CCND3	0.397875	4.83435	0.385	0.426	1
Ven.01.TSHZ2	HELZ	6.00818e-108	4.82377	0.558	0.235	2.06255e-103
Ven.01.TSHZ2	SPOPL	9.17708e-37	4.82181	0.253	0.098	3.1504e-32
Ven.01.TSHZ2	ZNF451	1.38676e-67	4.82173	0.415	0.171	4.76059e-63
Ven.01.TSHZ2	AGO2	5.93489e-74	4.82018	0.442	0.181	2.03739e-69
Ven.01.TSHZ2	REPS1	1.08422e-63	4.81808	0.333	0.11	3.72201e-59
Ven.01.TSHZ2	CSTF3	4.13556e-48	4.80838	0.285	0.103	1.41969e-43
Ven.01.TSHZ2	BAZ1A	4.61905e-57	4.80591	0.4	0.178	1.58568e-52
Ven.01.TSHZ2	TRPC4AP	1.02706e-109	4.79863	0.529	0.196	3.52578e-105
Ven.01.TSHZ2	PBX1	1.31274e-86	4.79645	0.545	0.269	4.50651e-82
Ven.01.TSHZ2	EDEM3	2.91597e-64	4.79281	0.383	0.147	1.00102e-59
Ven.01.TSHZ2	TFCP2	2.22335e-66	4.7732	0.385	0.142	7.63254e-62
Ven.01.TSHZ2	MYSM1	6.11793e-132	4.76039	0.488	0.126	2.10022e-127
Ven.01.TSHZ2	RNF111	6.40205e-145	4.75321	0.545	0.161	2.19776e-140
Ven.01.TSHZ2	GATAD2B	7.54814e-93	4.74146	0.509	0.209	2.5912e-88
Ven.01.TSHZ2	CPLANE1	9.42889e-100	4.73359	0.465	0.153	3.23684e-95
Ven.01.TSHZ2	MINDY3	3.41942e-108	4.73284	0.47	0.147	1.17385e-103
Ven.01.TSHZ2	RCOR1	1.96544e-67	4.71518	0.36	0.123	6.74717e-63
[truncated: 4,011 more rows]

## Sheet: Malignant
celltype	gene	p_val	avg_log2FC	pct.1	pct.2	p_val_adj
Neuronal Mimicry (Synaptic)	ASIC2	2.43798e-181	14.3676	0.485	0.029	8.34277e-177
Neuronal Mimicry (Synaptic)	ADGRB3	3.4773e-32	7.64483	0.694	0.308	1.18993e-27
Neuronal Mimicry (Synaptic)	GRIN1	0	6.69027	0.56	0.014	0
Neuronal Mimicry (Synaptic)	GABRA1	0	6.65171	0.381	0.001	0
Neuronal Mimicry (Synaptic)	CACNA1B	0	6.23714	0.537	0.018	0
Neuronal Mimicry (Synaptic)	GRM4	3.42697e-179	6.19864	0.261	0.007	1.17271e-174
Neuronal Mimicry (Synaptic)	RELN	8.48706e-237	6.18455	0.366	0.011	2.90427e-232
Neuronal Mimicry (Synaptic)	CAMK2A	6.18067e-305	6.13554	0.433	0.012	2.11502e-300
Neuronal Mimicry (Synaptic)	GRM1	0	6.05679	0.373	0.006	0
Neuronal Mimicry (Synaptic)	CDH9	0	6.04164	0.261	0.003	0
Neuronal Mimicry (Synaptic)	UNC13C	1.90466e-253	5.92666	0.433	0.015	6.51775e-249
Neuronal Mimicry (Synaptic)	CHD5	0	5.91548	0.47	0.013	0
Neuronal Mimicry (Synaptic)	MDGA1	7.23938e-90	5.84389	0.284	0.02	2.47732e-85
Neuronal Mimicry (Synaptic)	PHYHIP	1.35826e-282	5.83818	0.336	0.007	4.64796e-278
Neuronal Mimicry (Synaptic)	CACNA1E	1.02108e-276	5.80466	0.522	0.021	3.49414e-272
Neuronal Mimicry (Synaptic)	KCNJ3	0	5.76942	0.507	0.01	0
Neuronal Mimicry (Synaptic)	RBFOX3	0	5.76484	0.612	0.018	0
Neuronal Mimicry (Synaptic)	CACNG3	0	5.67363	0.313	0.001	0
Neuronal Mimicry (Synaptic)	FRMPD4	0	5.66617	0.418	0.01	0
Neuronal Mimicry (Synaptic)	UNC5A	3.99651e-269	5.58793	0.396	0.011	1.36761e-264
Neuronal Mimicry (Synaptic)	PTPRR	1.82588e-281	5.58213	0.41	0.012	6.24817e-277
Neuronal Mimicry (Synaptic)	WSCD2	0	5.52561	0.336	0.004	0
Neuronal Mimicry (Synaptic)	TMEM151B	1.90714e-229	5.43169	0.351	0.01	6.52622e-225
Neuronal Mimicry (Synaptic)	SLC8A2	8.39186e-235	5.38152	0.299	0.007	2.8717e-230
Neuronal Mimicry (Synaptic)	ARHGDIG	3.93951e-126	5.31545	0.306	0.016	1.3481e-121
Neuronal Mimicry (Synaptic)	CDH22	2.50475e-268	5.30198	0.299	0.005	8.57126e-264
Neuronal Mimicry (Synaptic)	PDIA2	2.93486e-242	5.18305	0.313	0.007	1.00431e-237
Neuronal Mimicry (Synaptic)	KCNT1	1.67639e-241	5.14591	0.366	0.011	5.7366e-237
Neuronal Mimicry (Synaptic)	TMEM130	6.31183e-171	5.13238	0.306	0.011	2.15991e-166
Neuronal Mimicry (Synaptic)	SYNPR	4.06985e-167	5.13229	0.321	0.013	1.3927e-162
Neuronal Mimicry (Synaptic)	IQSEC3	6.88874e-275	5.09527	0.343	0.008	2.35733e-270
Neuronal Mimicry (Synaptic)	LRRC7	3.1104e-102	5.07201	0.485	0.056	1.06438e-97
Neuronal Mimicry (Synaptic)	GRIN2B	3.2562e-184	4.98709	0.537	0.037	1.11427e-179
Neuronal Mimicry (Synaptic)	CABP1	1.87319e-223	4.95727	0.388	0.014	6.41006e-219
Neuronal Mimicry (Synaptic)	GALNT9	2.22007e-192	4.93126	0.284	0.008	7.59707e-188
Neuronal Mimicry (Synaptic)	PACSIN1	8.40612e-307	4.89319	0.358	0.007	2.87657e-302
Neuronal Mimicry (Synaptic)	GABRA4	0	4.85965	0.261	0.003	0
Neuronal Mimicry (Synaptic)	SPTBN4	8.02312e-166	4.8548	0.597	0.053	2.74551e-161
Neuronal Mimicry (Synaptic)	STX1B	1.36444e-155	4.82803	0.388	0.021	4.6691e-151
Neuronal Mimicry (Synaptic)	FBXL16	1.02416e-70	4.78712	0.328	0.035	3.50468e-66
Neuronal Mimicry (Synaptic)	PLCXD3	4.47577e-144	4.76393	0.254	0.009	1.53161e-139
Neuronal Mimicry (Synaptic)	CES4A	1.37537e-74	4.75652	0.343	0.037	4.70651e-70
Neuronal Mimicry (Synaptic)	ATP1A3	1.2669e-135	4.75015	0.485	0.041	4.33534e-131
Neuronal Mimicry (Synaptic)	CADM3	1.28247e-127	4.71236	0.455	0.038	4.3886e-123
Neuronal Mimicry (Synaptic)	KCTD16	2.48046e-90	4.68081	0.41	0.044	8.48813e-86
Neuronal Mimicry (Synaptic)	DLGAP3	8.74679e-196	4.67329	0.373	0.015	2.99315e-191
Neuronal Mimicry (Synaptic)	GLT1D1	4.20699e-142	4.66169	0.269	0.011	1.43963e-137
Neuronal Mimicry (Synaptic)	GABRD	4.57899e-151	4.66022	0.254	0.009	1.56693e-146
Neuronal Mimicry (Synaptic)	JPH3	2.17118e-121	4.65727	0.336	0.021	7.42979e-117
Neuronal Mimicry (Synaptic)	LRFN5	2.76776e-111	4.64945	0.41	0.036	9.47127e-107
Neuronal Mimicry (Synaptic)	MIR124-2HG	2.89883e-152	4.63682	0.313	0.014	9.91978e-148
Neuronal Mimicry (Synaptic)	KCNJ6	5.54287e-220	4.629	0.478	0.023	1.89677e-215
Neuronal Mimicry (Synaptic)	PTPN5	4.18652e-243	4.62333	0.254	0.004	1.43263e-238
Neuronal Mimicry (Synaptic)	GABRG2	5.67318e-164	4.62197	0.433	0.026	1.94136e-159
Neuronal Mimicry (Synaptic)	OLFM3	8.89214e-245	4.62127	0.396	0.013	3.04289e-240
Neuronal Mimicry (Synaptic)	RPH3A	8.62482e-149	4.57831	0.388	0.022	2.95141e-144
Neuronal Mimicry (Synaptic)	NDST3	8.37387e-129	4.55417	0.351	0.021	2.86554e-124
Neuronal Mimicry (Synaptic)	TNFRSF25	1.40985e-71	4.54959	0.313	0.032	4.82451e-67
Neuronal Mimicry (Synaptic)	SH3GL3	1.09668e-162	4.54401	0.433	0.026	3.75284e-158
Neuronal Mimicry (Synaptic)	AGAP2	2.84732e-128	4.52849	0.381	0.025	9.74353e-124
Neuronal Mimicry (Synaptic)	L1CAM	1.16301e-85	4.48386	0.373	0.038	3.97981e-81
Neuronal Mimicry (Synaptic)	GRM5	1.43823e-107	4.46996	0.455	0.045	4.92161e-103
Neuronal Mimicry (Synaptic)	SYN1	4.5132e-99	4.46155	0.299	0.02	1.54442e-94
Neuronal Mimicry (Synaptic)	PLEKHG5	3.30771e-84	4.44998	0.366	0.037	1.1319e-79
Neuronal Mimicry (Synaptic)	SPOCK3	5.80011e-51	4.44293	0.321	0.045	1.9848e-46
Neuronal Mimicry (Synaptic)	SH3GL2	9.9689e-96	4.43437	0.507	0.065	3.41136e-91
Neuronal Mimicry (Synaptic)	GABRB2	0	4.43341	0.664	0.015	0
Neuronal Mimicry (Synaptic)	BSN	9.99941e-167	4.38355	0.478	0.031	3.4218e-162
Neuronal Mimicry (Synaptic)	SCN1B	1.05308e-42	4.37955	0.254	0.034	3.60363e-38
Neuronal Mimicry (Synaptic)	MLXIPL	3.00037e-115	4.36091	0.276	0.014	1.02673e-110
Neuronal Mimicry (Synaptic)	NGEF	1.58881e-64	4.35535	0.299	0.032	5.4369e-60
Neuronal Mimicry (Synaptic)	FAM153CP	2.52143e-117	4.34199	0.351	0.024	8.62833e-113
Neuronal Mimicry (Synaptic)	CHRD	5.54766e-67	4.33089	0.269	0.025	1.89841e-62
Neuronal Mimicry (Synaptic)	SLC7A14	1.30957e-116	4.32701	0.343	0.023	4.48136e-112
Neuronal Mimicry (Synaptic)	ANK1	4.02031e-70	4.29777	0.291	0.028	1.37575e-65
Neuronal Mimicry (Synaptic)	CLVS2	1.9017e-157	4.26204	0.515	0.039	6.50762e-153
Neuronal Mimicry (Synaptic)	PDZD4	4.43619e-73	4.24415	0.313	0.031	1.51806e-68
Neuronal Mimicry (Synaptic)	KSR2	1.26198e-99	4.22582	0.5	0.06	4.31849e-95
Neuronal Mimicry (Synaptic)	SYP	1.14825e-74	4.22486	0.493	0.077	3.9293e-70
Neuronal Mimicry (Synaptic)	FRRS1L	1.14567e-155	4.21843	0.478	0.034	3.92048e-151
Neuronal Mimicry (Synaptic)	CAMK4	3.22618e-103	4.20643	0.5	0.057	1.104e-98
Neuronal Mimicry (Synaptic)	CALN1	8.17942e-130	4.18001	0.5	0.045	2.799e-125
Neuronal Mimicry (Synaptic)	RGS11	5.26043e-76	4.17575	0.321	0.031	1.80012e-71
Neuronal Mimicry (Synaptic)	RUNDC3B	4.03748e-128	4.1608	0.373	0.025	1.38163e-123
Neuronal Mimicry (Synaptic)	PPFIA4	5.88908e-89	4.15316	0.433	0.049	2.01524e-84
Neuronal Mimicry (Synaptic)	SULT4A1	6.17144e-69	4.15271	0.269	0.024	2.11187e-64
Neuronal Mimicry (Synaptic)	KIRREL3	6.89569e-98	4.15219	0.537	0.071	2.35971e-93
Neuronal Mimicry (Synaptic)	SHF	3.30188e-35	4.14875	0.284	0.05	1.1299e-30
Neuronal Mimicry (Synaptic)	CHGB	1.32149e-56	4.14028	0.388	0.059	4.52213e-52
Neuronal Mimicry (Synaptic)	CAMKK1	1.24882e-71	4.13548	0.336	0.036	4.27347e-67
Neuronal Mimicry (Synaptic)	OGDHL	2.71106e-92	4.10892	0.261	0.017	9.27724e-88
Neuronal Mimicry (Synaptic)	SRRM4	1.36456e-190	4.09614	0.53	0.034	4.66953e-186
Neuronal Mimicry (Synaptic)	PTPRN	1.8355e-98	4.0961	0.313	0.022	6.28108e-94
Neuronal Mimicry (Synaptic)	RUNDC3A	9.68494e-92	4.08372	0.381	0.036	3.31419e-87
Neuronal Mimicry (Synaptic)	JPH4	8.67099e-94	4.08147	0.47	0.055	2.96721e-89
Neuronal Mimicry (Synaptic)	AJAP1	8.50983e-99	4.06363	0.261	0.015	2.91206e-94
Neuronal Mimicry (Synaptic)	NELL2	6.80669e-85	4.05998	0.56	0.091	2.32925e-80
Neuronal Mimicry (Synaptic)	TPPP	2.99405e-74	4.05945	0.284	0.025	1.02456e-69
Neuronal Mimicry (Synaptic)	KNDC1	1.72133e-74	4.05504	0.328	0.033	5.89039e-70
Neuronal Mimicry (Synaptic)	SYT16	5.97004e-93	4.05328	0.44	0.049	2.04295e-88
Neuronal Mimicry (Synaptic)	TMEM145	1.45713e-54	4.05078	0.321	0.043	4.9863e-50
Neuronal Mimicry (Synaptic)	ST8SIA3	1.66343e-143	4.04485	0.313	0.014	5.69227e-139
Neuronal Mimicry (Synaptic)	NRGN	9.24522e-51	4.03169	0.306	0.041	3.16372e-46
Neuronal Mimicry (Synaptic)	MIR137HG	8.55394e-91	4.01074	0.306	0.024	2.92716e-86
Neuronal Mimicry (Synaptic)	PRKCB	9.81187e-114	4.00498	0.5	0.052	3.35762e-109
Neuronal Mimicry (Synaptic)	RTN1	2.29622e-97	4.00484	0.731	0.138	7.85765e-93
Neuronal Mimicry (Synaptic)	ARPP21	1.47918e-71	4.00417	0.53	0.095	5.06174e-67
Neuronal Mimicry (Synaptic)	SEPTIN5	1.63639e-48	4.00057	0.321	0.048	5.59974e-44
Neuronal Mimicry (Synaptic)	CHGA	6.42288e-37	3.96062	0.254	0.038	2.19791e-32
Neuronal Mimicry (Synaptic)	HMGCLL1	2.86809e-130	3.95206	0.261	0.011	9.81461e-126
Neuronal Mimicry (Synaptic)	GPR162	3.054e-56	3.95199	0.276	0.031	1.04508e-51
Neuronal Mimicry (Synaptic)	EPHB6	1.57604e-80	3.94312	0.261	0.019	5.39321e-76
Neuronal Mimicry (Synaptic)	KCNIP4-IT1	5.81633e-107	3.92992	0.254	0.013	1.99035e-102
Neuronal Mimicry (Synaptic)	FAIM2	1.251e-60	3.92944	0.41	0.064	4.28091e-56
Neuronal Mimicry (Synaptic)	KLHL3	1.95394e-82	3.90338	0.388	0.043	6.68638e-78
Neuronal Mimicry (Synaptic)	PKD1	5.44711e-57	3.87063	0.619	0.164	1.864e-52
Neuronal Mimicry (Synaptic)	CPLX2	1.32638e-81	3.86505	0.343	0.033	4.53888e-77
Neuronal Mimicry (Synaptic)	TMEM178A	1.01216e-80	3.84826	0.455	0.06	3.46362e-76
Neuronal Mimicry (Synaptic)	NCDN	3.40997e-51	3.84017	0.373	0.061	1.16689e-46
Neuronal Mimicry (Synaptic)	PAK5	2.07981e-67	3.82971	0.328	0.037	7.11711e-63
Neuronal Mimicry (Synaptic)	NDRG4	1.96878e-89	3.82381	0.507	0.068	6.73718e-85
Neuronal Mimicry (Synaptic)	JAKMIP3	1.07878e-89	3.82275	0.291	0.021	3.69157e-85
Neuronal Mimicry (Synaptic)	PLPPR4	6.62555e-65	3.81686	0.358	0.045	2.26726e-60
Neuronal Mimicry (Synaptic)	TMEM59L	8.61506e-62	3.8082	0.522	0.1	2.94807e-57
Neuronal Mimicry (Synaptic)	CAMK2B	2.54036e-85	3.7911	0.478	0.063	8.69312e-81
Neuronal Mimicry (Synaptic)	RIMBP2	8.31479e-109	3.77511	0.366	0.028	2.84532e-104
Neuronal Mimicry (Synaptic)	CACNG2	7.95039e-105	3.76759	0.358	0.027	2.72062e-100
Neuronal Mimicry (Synaptic)	LRFN2	3.20884e-96	3.76661	0.254	0.015	1.09807e-91
Neuronal Mimicry (Synaptic)	RAB3A	3.1022e-35	3.76275	0.254	0.04	1.06157e-30
Neuronal Mimicry (Synaptic)	PRRT2	2.91326e-39	3.75851	0.321	0.057	9.96918e-35
Neuronal Mimicry (Synaptic)	PPP2R2C	1.62355e-147	3.74202	0.552	0.05	5.55578e-143
Neuronal Mimicry (Synaptic)	ARVCF	1.36364e-28	3.72536	0.269	0.054	4.66638e-24
Neuronal Mimicry (Synaptic)	KCNH1	2.87516e-70	3.69066	0.455	0.068	9.83879e-66
Neuronal Mimicry (Synaptic)	NEURL1	2.82419e-96	3.69	0.373	0.033	9.66438e-92
Neuronal Mimicry (Synaptic)	MGAT4C	8.86971e-76	3.66807	0.381	0.044	3.03522e-71
Neuronal Mimicry (Synaptic)	ZNF365	2.01676e-68	3.66743	0.321	0.034	6.90135e-64
Neuronal Mimicry (Synaptic)	ZFYVE28	2.9227e-64	3.6654	0.522	0.099	1.00015e-59
Neuronal Mimicry (Synaptic)	GALNTL6	1.281e-108	3.64154	0.358	0.027	4.38359e-104
Neuronal Mimicry (Synaptic)	NPTX1	5.55639e-107	3.59762	0.336	0.024	1.9014e-102
Neuronal Mimicry (Synaptic)	CACNG8	1.61976e-61	3.59687	0.276	0.028	5.54282e-57
Neuronal Mimicry (Synaptic)	KCNC1	9.88429e-65	3.59625	0.336	0.039	3.3824e-60
Neuronal Mimicry (Synaptic)	GPRASP1	7.79254e-69	3.58936	0.321	0.034	2.66661e-64
Neuronal Mimicry (Synaptic)	SLC12A5	1.14552e-70	3.58709	0.299	0.029	3.91999e-66
Neuronal Mimicry (Synaptic)	DNM1	8.37589e-80	3.5783	0.657	0.135	2.86623e-75
Neuronal Mimicry (Synaptic)	RASGRF2	5.16915e-71	3.56717	0.351	0.04	1.76888e-66
Neuronal Mimicry (Synaptic)	PEG3	3.55185e-51	3.56622	0.358	0.055	1.21544e-46
Neuronal Mimicry (Synaptic)	GOLGA7B	3.8205e-32	3.5522	0.254	0.043	1.30738e-27
Neuronal Mimicry (Synaptic)	MIAT	1.24268e-48	3.53828	0.418	0.081	4.25246e-44
Neuronal Mimicry (Synaptic)	CPLX1	4.68296e-44	3.53763	0.276	0.039	1.60251e-39
Neuronal Mimicry (Synaptic)	SLC6A17	1.16741e-65	3.53668	0.276	0.026	3.99487e-61
Neuronal Mimicry (Synaptic)	CNTNAP1	5.36813e-71	3.5309	0.313	0.031	1.83698e-66
Neuronal Mimicry (Synaptic)	SGSM1	3.87137e-84	3.51633	0.41	0.046	1.32478e-79
Neuronal Mimicry (Synaptic)	CELF5	4.62825e-66	3.51026	0.381	0.05	1.58379e-61
Neuronal Mimicry (Synaptic)	DMTN	3.82204e-33	3.5052	0.254	0.043	1.3079e-28
Neuronal Mimicry (Synaptic)	KIF5A	5.69256e-81	3.49497	0.44	0.055	1.94799e-76
Neuronal Mimicry (Synaptic)	CEND1	7.80991e-40	3.46825	0.276	0.042	2.67255e-35
Neuronal Mimicry (Synaptic)	ACTL6B	2.82033e-62	3.45053	0.291	0.031	9.65116e-58
Neuronal Mimicry (Synaptic)	EML6	4.24114e-58	3.44669	0.425	0.071	1.45132e-53
Neuronal Mimicry (Synaptic)	TUBGCP6	2.53494e-33	3.42373	0.366	0.085	8.67456e-29
Neuronal Mimicry (Synaptic)	NUAK1	4.36266e-54	3.42275	0.366	0.055	1.4929e-49
Neuronal Mimicry (Synaptic)	RNF175	1.42377e-50	3.41354	0.306	0.041	4.87215e-46
Neuronal Mimicry (Synaptic)	ADGRB2	3.87755e-40	3.39806	0.276	0.041	1.3269e-35
Neuronal Mimicry (Synaptic)	LZTS3	3.87564e-38	3.39672	0.328	0.061	1.32624e-33
Neuronal Mimicry (Synaptic)	BRSK1	7.09397e-40	3.39274	0.336	0.062	2.42756e-35
Neuronal Mimicry (Synaptic)	EIF4E3	1.57093e-34	3.35237	0.299	0.055	5.37572e-30
Neuronal Mimicry (Synaptic)	ZNF382	5.40932e-34	3.35086	0.254	0.041	1.85107e-29
Neuronal Mimicry (Synaptic)	UNC13A	3.74519e-61	3.34715	0.366	0.049	1.28161e-56
Neuronal Mimicry (Synaptic)	PTPRB	2.29943e-70	3.33908	0.284	0.026	7.86866e-66
Neuronal Mimicry (Synaptic)	ACSL6	1.47781e-58	3.32728	0.313	0.037	5.05705e-54
Neuronal Mimicry (Synaptic)	RCAN2	4.07635e-73	3.32354	0.463	0.067	1.39493e-68
Neuronal Mimicry (Synaptic)	KCNC3	8.36947e-36	3.31585	0.254	0.039	2.86403e-31
Neuronal Mimicry (Synaptic)	PPFIA2	1.58994e-49	3.30079	0.515	0.122	5.44079e-45
Neuronal Mimicry (Synaptic)	TNXB	1.37835e-50	3.26779	0.254	0.029	4.71673e-46
Neuronal Mimicry (Synaptic)	CNKSR2	2.73813e-59	3.24484	0.522	0.107	9.36989e-55
Neuronal Mimicry (Synaptic)	ARHGAP44	7.79106e-65	3.22662	0.44	0.068	2.6661e-60
Neuronal Mimicry (Synaptic)	SRRM3	1.87381e-59	3.21745	0.41	0.063	6.41217e-55
Neuronal Mimicry (Synaptic)	ADD2	5.33633e-47	3.19294	0.433	0.088	1.82609e-42
Neuronal Mimicry (Synaptic)	UNC79	1.58333e-73	3.18391	0.59	0.112	5.41815e-69
Neuronal Mimicry (Synaptic)	EML5	9.20988e-72	3.1836	0.425	0.058	3.15162e-67
Neuronal Mimicry (Synaptic)	KIFC2	6.27396e-26	3.18123	0.351	0.095	2.14695e-21
Neuronal Mimicry (Synaptic)	SV2B	8.26855e-305	3.18042	0.5	0.017	2.8295e-300
Neuronal Mimicry (Synaptic)	ZFR2	1.05138e-63	3.17786	0.284	0.028	3.59782e-59
Neuronal Mimicry (Synaptic)	ABLIM2	5.11645e-46	3.17013	0.358	0.062	1.75085e-41
Neuronal Mimicry (Synaptic)	DIRAS2	4.96634e-27	3.16946	0.254	0.049	1.69948e-22
Neuronal Mimicry (Synaptic)	YJEFN3	4.96198e-33	3.16513	0.269	0.047	1.69799e-28
Neuronal Mimicry (Synaptic)	OPCML	7.0107e-79	3.16426	0.716	0.151	2.39906e-74
Neuronal Mimicry (Synaptic)	SRCIN1	1.17984e-42	3.16166	0.373	0.07	4.03741e-38
Neuronal Mimicry (Synaptic)	KIF5C	1.7706e-64	3.1521	0.657	0.163	6.05901e-60
Neuronal Mimicry (Synaptic)	SYT4	1.32049e-56	3.13167	0.261	0.026	4.5187e-52
Neuronal Mimicry (Synaptic)	GUCY1B1	4.02743e-44	3.12291	0.284	0.04	1.37819e-39
Neuronal Mimicry (Synaptic)	RGS7BP	3.63134e-65	3.10999	0.351	0.042	1.24264e-60
Neuronal Mimicry (Synaptic)	TSPYL2	1.33698e-30	3.10994	0.522	0.172	4.57513e-26
Neuronal Mimicry (Synaptic)	SEPTIN4	1.87429e-31	3.10922	0.261	0.047	6.41382e-27
Neuronal Mimicry (Synaptic)	BRINP2	1.89551e-41	3.10213	0.313	0.051	6.48644e-37
Neuronal Mimicry (Synaptic)	ELMOD1	1.67463e-68	3.09321	0.388	0.049	5.73059e-64
Neuronal Mimicry (Synaptic)	ACAP3	8.31028e-23	3.09208	0.433	0.155	2.84378e-18
Neuronal Mimicry (Synaptic)	CLSTN3	3.01337e-32	3.07206	0.373	0.091	1.03117e-27
Neuronal Mimicry (Synaptic)	LMTK3	1.06213e-37	3.07155	0.336	0.064	3.6346e-33
Neuronal Mimicry (Synaptic)	PDE2A	4.10559e-74	3.04193	0.254	0.019	1.40493e-69
Neuronal Mimicry (Synaptic)	TMEM63C	6.62863e-50	3.04079	0.381	0.063	2.26832e-45
Neuronal Mimicry (Synaptic)	SV2A	1.03966e-23	3.03178	0.313	0.081	3.5577e-19
Neuronal Mimicry (Synaptic)	ZNF483	1.66486e-56	3.0283	0.507	0.102	5.69715e-52
Neuronal Mimicry (Synaptic)	ENO2	2.04498e-26	3.02412	0.485	0.173	6.99793e-22
Neuronal Mimicry (Synaptic)	NETO1	4.85162e-38	3.01158	0.343	0.065	1.66022e-33
Neuronal Mimicry (Synaptic)	MAST1	3.60954e-46	3.01151	0.366	0.063	1.23518e-41
Neuronal Mimicry (Synaptic)	NPTXR	6.70452e-31	3.00708	0.261	0.047	2.29429e-26
Neuronal Mimicry (Synaptic)	B4GALNT1	3.35296e-41	3.00395	0.276	0.04	1.14738e-36
Neuronal Mimicry (Synaptic)	KIAA0513	6.49929e-80	2.9968	0.47	0.065	2.22406e-75
Neuronal Mimicry (Synaptic)	ST8SIA5	5.47469e-47	2.99424	0.381	0.067	1.87344e-42
Neuronal Mimicry (Synaptic)	RAB6B	1.51666e-41	2.99221	0.448	0.102	5.19001e-37
Neuronal Mimicry (Synaptic)	SYT7	1.25471e-37	2.98262	0.381	0.082	4.29361e-33
Neuronal Mimicry (Synaptic)	SPTB	1.25419e-29	2.98152	0.284	0.056	4.29182e-25
Neuronal Mimicry (Synaptic)	MAP1A	2.39939e-33	2.97687	0.343	0.075	8.21071e-29
Neuronal Mimicry (Synaptic)	TRMT9B	2.40667e-39	2.97594	0.396	0.084	8.23564e-35
Neuronal Mimicry (Synaptic)	BIN1	1.00154e-30	2.97335	0.448	0.133	3.42726e-26
Neuronal Mimicry (Synaptic)	NISCH	7.78077e-20	2.9652	0.425	0.166	2.66258e-15
Neuronal Mimicry (Synaptic)	LRRC4B	1.1956e-30	2.96495	0.351	0.08	4.09134e-26
Neuronal Mimicry (Synaptic)	NSG2	1.47804e-56	2.95857	0.418	0.067	5.05786e-52
Neuronal Mimicry (Synaptic)	CAMKK2	5.87485e-18	2.95819	0.373	0.14	2.01037e-13
Neuronal Mimicry (Synaptic)	FAM135B	6.32485e-38	2.95803	0.321	0.058	2.16436e-33
Neuronal Mimicry (Synaptic)	CELF4	4.68043e-73	2.93843	0.515	0.083	1.60164e-68
Neuronal Mimicry (Synaptic)	NLGN2	9.57607e-17	2.93306	0.254	0.073	3.27693e-12
Neuronal Mimicry (Synaptic)	ABTB1	8.47845e-18	2.92907	0.254	0.07	2.90133e-13
Neuronal Mimicry (Synaptic)	NAALAD2	5.67672e-65	2.92825	0.269	0.025	1.94257e-60
Neuronal Mimicry (Synaptic)	STXBP1	4.08197e-50	2.92646	0.709	0.246	1.39685e-45
Neuronal Mimicry (Synaptic)	TRANK1	2.19353e-41	2.92266	0.418	0.092	7.50626e-37
Neuronal Mimicry (Synaptic)	RASGRF1	9.00938e-79	2.91934	0.336	0.032	3.08301e-74
Neuronal Mimicry (Synaptic)	PPIP5K1	4.14726e-32	2.91317	0.328	0.07	1.41919e-27
Neuronal Mimicry (Synaptic)	SLC36A1	1.80142e-21	2.91123	0.269	0.067	6.16446e-17
Neuronal Mimicry (Synaptic)	BRSK2	1.99028e-51	2.91103	0.328	0.046	6.81075e-47
Neuronal Mimicry (Synaptic)	GRAMD1B	6.70472e-66	2.90954	0.47	0.075	2.29436e-61
Neuronal Mimicry (Synaptic)	DLG4	4.03293e-30	2.89432	0.269	0.05	1.38007e-25
Neuronal Mimicry (Synaptic)	SCN8A	8.08782e-45	2.89205	0.53	0.139	2.76765e-40
Neuronal Mimicry (Synaptic)	NRSN1	1.03202e-45	2.88573	0.291	0.04	3.53158e-41
Neuronal Mimicry (Synaptic)	EPHA5	4.02948e-28	2.88252	0.261	0.05	1.37889e-23
Neuronal Mimicry (Synaptic)	MAPRE3	3.76391e-39	2.87978	0.478	0.122	1.28801e-34
Neuronal Mimicry (Synaptic)	PDE1A	1.95949e-96	2.87514	0.455	0.051	6.70536e-92
Neuronal Mimicry (Synaptic)	ABCC8	1.7519e-61	2.87024	0.276	0.027	5.99499e-57
Neuronal Mimicry (Synaptic)	SGCZ	1.9319e-19	2.86675	0.313	0.09	6.61096e-15
Neuronal Mimicry (Synaptic)	TMEM132B	1.11832e-32	2.86467	0.418	0.109	3.8269e-28
Neuronal Mimicry (Synaptic)	FZR1	3.12823e-12	2.84259	0.306	0.125	1.07048e-07
Neuronal Mimicry (Synaptic)	RAB11FIP4	4.23378e-49	2.83906	0.418	0.078	1.4488e-44
Neuronal Mimicry (Synaptic)	MMP24	1.28268e-28	2.83882	0.336	0.08	4.38932e-24
Neuronal Mimicry (Synaptic)	KIAA0930	3.67091e-29	2.83748	0.418	0.116	1.25619e-24
Neuronal Mimicry (Synaptic)	C14orf132	3.08955e-27	2.83442	0.269	0.055	1.05724e-22
Neuronal Mimicry (Synaptic)	CATSPER2	1.35793e-37	2.83387	0.396	0.088	4.64684e-33
Neuronal Mimicry (Synaptic)	LPCAT4	9.00758e-23	2.82729	0.299	0.077	3.08239e-18
Neuronal Mimicry (Synaptic)	PTPRO	8.32535e-26	2.81975	0.351	0.093	2.84893e-21
Neuronal Mimicry (Synaptic)	KIF3C	3.96119e-31	2.8132	0.351	0.08	1.35552e-26
Neuronal Mimicry (Synaptic)	TMEFF2	1.80755e-37	2.79534	0.381	0.08	6.18544e-33
Neuronal Mimicry (Synaptic)	WDR17	6.13019e-40	2.79527	0.418	0.093	2.09775e-35
Neuronal Mimicry (Synaptic)	PIP5K1C	4.01814e-21	2.7938	0.328	0.098	1.37501e-16
Neuronal Mimicry (Synaptic)	CYP46A1	2.84358e-38	2.79302	0.269	0.04	9.73073e-34
Neuronal Mimicry (Synaptic)	ADAM22	8.91788e-52	2.76657	0.642	0.18	3.0517e-47
Neuronal Mimicry (Synaptic)	KIF1A	6.23404e-49	2.75066	0.545	0.134	2.13329e-44
Neuronal Mimicry (Synaptic)	SOGA3	6.08164e-42	2.74293	0.425	0.089	2.08114e-37
Neuronal Mimicry (Synaptic)	NRXN2	5.68512e-45	2.73857	0.433	0.088	1.94545e-40
Neuronal Mimicry (Synaptic)	REEP2	2.92144e-41	2.72433	0.328	0.055	9.99715e-37
Neuronal Mimicry (Synaptic)	LRRN2	4.34314e-29	2.72384	0.261	0.048	1.48622e-24
Neuronal Mimicry (Synaptic)	SLITRK5	2.37736e-31	2.7205	0.254	0.043	8.13534e-27
Neuronal Mimicry (Synaptic)	GRIA1	2.92765e-63	2.71306	0.485	0.086	1.00184e-58
Neuronal Mimicry (Synaptic)	MAPKBP1	2.49647e-28	2.71012	0.433	0.129	8.54294e-24
Neuronal Mimicry (Synaptic)	KCND3	2.54039e-44	2.7043	0.455	0.1	8.6932e-40
Neuronal Mimicry (Synaptic)	SHANK3	2.33843e-55	2.70311	0.313	0.04	8.00211e-51
Neuronal Mimicry (Synaptic)	DCTN1	3.03657e-18	2.69398	0.44	0.187	1.03911e-13
Neuronal Mimicry (Synaptic)	LINGO1	6.58892e-19	2.68091	0.276	0.074	2.25473e-14
Neuronal Mimicry (Synaptic)	PTK2B	3.01712e-26	2.6795	0.403	0.12	1.03246e-21
Neuronal Mimicry (Synaptic)	APBB1	1.7672e-30	2.67803	0.336	0.076	6.04737e-26
Neuronal Mimicry (Synaptic)	OLFM1	3.94673e-28	2.67612	0.373	0.099	1.35057e-23
Neuronal Mimicry (Synaptic)	SYNDIG1	1.98739e-32	2.67302	0.306	0.06	6.80083e-28
Neuronal Mimicry (Synaptic)	FBXO44	3.22262e-18	2.67213	0.299	0.092	1.10278e-13
Neuronal Mimicry (Synaptic)	TMEM232	1.48485e-35	2.66892	0.41	0.098	5.08117e-31
Neuronal Mimicry (Synaptic)	ADCY1	2.47292e-42	2.66543	0.433	0.093	8.46233e-38
Neuronal Mimicry (Synaptic)	DNAH6	7.46925e-35	2.65648	0.276	0.046	2.55598e-30
Neuronal Mimicry (Synaptic)	ABCA2	3.20578e-18	2.65355	0.276	0.079	1.09702e-13
Neuronal Mimicry (Synaptic)	SERPINI1	1.17254e-40	2.65282	0.343	0.062	4.01242e-36
Neuronal Mimicry (Synaptic)	BEND6	1.97649e-29	2.64299	0.321	0.07	6.76354e-25
Neuronal Mimicry (Synaptic)	ATCAY	6.01591e-39	2.63206	0.403	0.086	2.05865e-34
Neuronal Mimicry (Synaptic)	CNR1	1.22087e-27	2.62317	0.269	0.054	4.17783e-23
Neuronal Mimicry (Synaptic)	IQSEC2	1.61395e-23	2.61635	0.321	0.085	5.52295e-19
Neuronal Mimicry (Synaptic)	ZNF804A	4.14114e-11	2.58524	0.261	0.098	1.4171e-06
Neuronal Mimicry (Synaptic)	RAB26	1.33457e-26	2.56942	0.254	0.05	4.56688e-22
Neuronal Mimicry (Synaptic)	MCF2L2	1.12353e-36	2.56652	0.463	0.121	3.84472e-32
Neuronal Mimicry (Synaptic)	BTBD8	2.74331e-38	2.56515	0.418	0.095	9.38761e-34
Neuronal Mimicry (Synaptic)	INPP5A	1.55573e-21	2.55954	0.381	0.125	5.3237e-17
Neuronal Mimicry (Synaptic)	ABCA10	5.70069e-34	2.5591	0.299	0.055	1.95078e-29
Neuronal Mimicry (Synaptic)	KLHL32	8.65349e-17	2.54642	0.269	0.078	2.96123e-12
Neuronal Mimicry (Synaptic)	UNC80	3.45755e-59	2.54279	0.642	0.157	1.18317e-54
Neuronal Mimicry (Synaptic)	PRKAR1B	6.42079e-33	2.53846	0.537	0.181	2.19719e-28
Neuronal Mimicry (Synaptic)	MAP6	9.68533e-31	2.53829	0.299	0.06	3.31432e-26
Neuronal Mimicry (Synaptic)	MAPK8IP3	6.89923e-25	2.53814	0.537	0.217	2.36092e-20
Neuronal Mimicry (Synaptic)	GNB5	1.20173e-22	2.52807	0.418	0.144	4.11231e-18
Neuronal Mimicry (Synaptic)	AATK	3.88571e-34	2.52599	0.358	0.077	1.32969e-29
Neuronal Mimicry (Synaptic)	CPEB1	5.53004e-40	2.51734	0.313	0.052	1.89238e-35
Neuronal Mimicry (Synaptic)	CLIP3	6.78968e-18	2.51073	0.291	0.087	2.32343e-13
Neuronal Mimicry (Synaptic)	GRIK5	2.58078e-19	2.50708	0.261	0.066	8.83142e-15
Neuronal Mimicry (Synaptic)	CLVS1	1.2402e-29	2.50314	0.299	0.06	4.24396e-25
Neuronal Mimicry (Synaptic)	GRM7	3.06391e-60	2.49991	0.448	0.074	1.04847e-55
Neuronal Mimicry (Synaptic)	GLRB	2.71701e-32	2.49119	0.351	0.078	9.2976e-28
Neuronal Mimicry (Synaptic)	ZNF589	3.11751e-24	2.48872	0.306	0.076	1.06681e-19
Neuronal Mimicry (Synaptic)	PRKACA	6.49271e-10	2.47726	0.284	0.124	2.2218e-05
Neuronal Mimicry (Synaptic)	LIN7A	1.02782e-31	2.47675	0.291	0.056	3.5172e-27
Neuronal Mimicry (Synaptic)	IGSF9B	1.3457e-44	2.47225	0.448	0.093	4.60498e-40
Neuronal Mimicry (Synaptic)	SCAMP5	4.36695e-24	2.46466	0.343	0.093	1.49437e-19
Neuronal Mimicry (Synaptic)	HSPA12A	4.801e-21	2.46227	0.396	0.136	1.6429e-16
Neuronal Mimicry (Synaptic)	RAPGEF4	5.34761e-31	2.45392	0.463	0.138	1.82995e-26
Neuronal Mimicry (Synaptic)	MYT1L	1.30583e-97	2.44605	0.5	0.063	4.46856e-93
Neuronal Mimicry (Synaptic)	SLIT1	4.01338e-28	2.4417	0.321	0.071	1.37338e-23
Neuronal Mimicry (Synaptic)	CYFIP2	1.64605e-38	2.43677	0.515	0.14	5.6328e-34
Neuronal Mimicry (Synaptic)	SYNGR1	3.23498e-13	2.43109	0.328	0.132	1.10701e-08
Neuronal Mimicry (Synaptic)	PRNP	1.61263e-16	2.42409	0.507	0.264	5.51841e-12
Neuronal Mimicry (Synaptic)	FLCN	2.79133e-15	2.41354	0.351	0.135	9.55194e-11
Neuronal Mimicry (Synaptic)	NOVA2	5.99861e-24	2.40812	0.269	0.06	2.05272e-19
Neuronal Mimicry (Synaptic)	LENG8	4.26353e-12	2.40725	0.5	0.295	1.45898e-07
Neuronal Mimicry (Synaptic)	EEF1A2	4.52974e-14	2.40333	0.284	0.098	1.55008e-09
Neuronal Mimicry (Synaptic)	PREPL	4.35413e-25	2.3965	0.634	0.316	1.48998e-20
Neuronal Mimicry (Synaptic)	MAN1C1	7.44531e-31	2.3962	0.336	0.073	2.54779e-26
Neuronal Mimicry (Synaptic)	DUBR	1.54216e-18	2.39615	0.261	0.069	5.27728e-14
Neuronal Mimicry (Synaptic)	ASTN1	1.88776e-27	2.39419	0.448	0.137	6.4599e-23
Neuronal Mimicry (Synaptic)	KCNAB2	1.80348e-36	2.39161	0.373	0.078	6.1715e-32
Neuronal Mimicry (Synaptic)	CALCOCO1	2.59521e-17	2.38828	0.403	0.162	8.88081e-13
Neuronal Mimicry (Synaptic)	IGSF8	3.82058e-20	2.38818	0.425	0.162	1.3074e-15
Neuronal Mimicry (Synaptic)	NEIL1	1.47938e-17	2.38602	0.261	0.073	5.06242e-13
Neuronal Mimicry (Synaptic)	DGKZ	1.00175e-17	2.37507	0.381	0.143	3.42797e-13
Neuronal Mimicry (Synaptic)	MYO18A	2.7198e-16	2.37299	0.373	0.143	9.30716e-12
Neuronal Mimicry (Synaptic)	SPOCK2	5.11408e-25	2.36711	0.313	0.076	1.75004e-20
Neuronal Mimicry (Synaptic)	CCDC136	1.03081e-20	2.36319	0.276	0.07	3.52743e-16
Neuronal Mimicry (Synaptic)	RAP1GAP	3.01768e-26	2.35919	0.343	0.087	1.03265e-21
Neuronal Mimicry (Synaptic)	SEC31B	4.06689e-25	2.35914	0.261	0.054	1.39169e-20
Neuronal Mimicry (Synaptic)	ICA1L	1.44654e-29	2.35119	0.478	0.152	4.95006e-25
Neuronal Mimicry (Synaptic)	GPC1	2.84509e-14	2.33812	0.373	0.154	9.73589e-10
Neuronal Mimicry (Synaptic)	MADD	3.49724e-15	2.33805	0.313	0.111	1.19676e-10
Neuronal Mimicry (Synaptic)	TSPAN7	3.27939e-22	2.32589	0.545	0.233	1.12221e-17
Neuronal Mimicry (Synaptic)	RAB3C	3.01787e-33	2.31902	0.299	0.056	1.03271e-28
Neuronal Mimicry (Synaptic)	SORCS3	9.20816e-17	2.31388	0.306	0.098	3.15103e-12
Neuronal Mimicry (Synaptic)	SOGA1	3.2001e-10	2.29721	0.381	0.197	1.09507e-05
Neuronal Mimicry (Synaptic)	TYRO3	6.28583e-16	2.29559	0.269	0.083	2.15101e-11
Neuronal Mimicry (Synaptic)	FAM171B	3.13172e-23	2.27729	0.463	0.161	1.07167e-18
Neuronal Mimicry (Synaptic)	BMPER	5.74069e-46	2.27107	0.313	0.047	1.96446e-41
Neuronal Mimicry (Synaptic)	CLK4	1.57537e-13	2.2645	0.41	0.195	5.39091e-09
Neuronal Mimicry (Synaptic)	MTUS2	4.41395e-250	2.25927	0.44	0.016	1.51045e-245
Neuronal Mimicry (Synaptic)	COG1	6.46444e-14	2.25908	0.306	0.111	2.21213e-09
Neuronal Mimicry (Synaptic)	TAFA5	8.39485e-33	2.25749	0.47	0.13	2.87272e-28
Neuronal Mimicry (Synaptic)	TTC7B	3.90881e-28	2.25125	0.515	0.177	1.33759e-23
Neuronal Mimicry (Synaptic)	HECW2	1.49743e-43	2.24991	0.478	0.112	5.12421e-39
Neuronal Mimicry (Synaptic)	ALS2	1.04104e-16	2.24965	0.433	0.183	3.56243e-12
Neuronal Mimicry (Synaptic)	CACNB4	8.36289e-41	2.24826	0.522	0.137	2.86178e-36
Neuronal Mimicry (Synaptic)	ZDBF2	2.69465e-15	2.24536	0.276	0.087	9.2211e-11
Neuronal Mimicry (Synaptic)	CLSTN1	8.55774e-19	2.2379	0.612	0.336	2.92846e-14
Neuronal Mimicry (Synaptic)	MICU3	1.83143e-30	2.23773	0.515	0.17	6.26716e-26
Neuronal Mimicry (Synaptic)	PHTF1	1.85416e-25	2.23656	0.455	0.15	6.34493e-21
Neuronal Mimicry (Synaptic)	APLP1	4.42864e-21	2.21758	0.358	0.109	1.51548e-16
Neuronal Mimicry (Synaptic)	CAMTA2	7.56378e-13	2.21362	0.269	0.095	2.58833e-08
Neuronal Mimicry (Synaptic)	APC2	1.97429e-20	2.21335	0.306	0.083	6.75603e-16
Neuronal Mimicry (Synaptic)	ULK1	1.16344e-09	2.21028	0.299	0.136	3.98128e-05
Neuronal Mimicry (Synaptic)	TMOD2	3.00395e-19	2.20943	0.373	0.124	1.02795e-14
Neuronal Mimicry (Synaptic)	RUNX1T1	5.05368e-29	2.20566	0.403	0.108	1.72937e-24
Neuronal Mimicry (Synaptic)	NIN	1.24414e-07	2.20493	0.478	0.326	0.00425745
Neuronal Mimicry (Synaptic)	MTURN	1.23876e-09	2.19568	0.343	0.168	4.23904e-05
Neuronal Mimicry (Synaptic)	FMN2	4.05489e-24	2.17568	0.485	0.182	1.38758e-19
Neuronal Mimicry (Synaptic)	SPTBN2	5.49674e-15	2.17318	0.299	0.103	1.88098e-10
Neuronal Mimicry (Synaptic)	ACADSB	1.53914e-09	2.17232	0.269	0.113	5.26693e-05
Neuronal Mimicry (Synaptic)	CDH10	3.78062e-21	2.16981	0.351	0.104	1.29373e-16
Neuronal Mimicry (Synaptic)	ELAVL3	3.48543e-29	2.16976	0.478	0.141	1.19272e-24
Neuronal Mimicry (Synaptic)	RTEL1	7.17297e-14	2.16689	0.254	0.081	2.45459e-09
Neuronal Mimicry (Synaptic)	CNNM2	2.65093e-14	2.16373	0.381	0.158	9.07147e-10
Neuronal Mimicry (Synaptic)	ASPHD1	2.97567e-15	2.15299	0.306	0.103	1.01827e-10
Neuronal Mimicry (Synaptic)	CCSAP	6.33771e-14	2.14991	0.299	0.106	2.16877e-09
Neuronal Mimicry (Synaptic)	WASF1	2.69025e-19	2.14502	0.425	0.163	9.20605e-15
Neuronal Mimicry (Synaptic)	DELE1	1.65429e-11	2.13258	0.328	0.145	5.66097e-07
Neuronal Mimicry (Synaptic)	ZMAT4	5.34495e-38	2.1301	0.276	0.043	1.82904e-33
Neuronal Mimicry (Synaptic)	IQSEC1	5.39726e-38	2.12972	0.56	0.177	1.84694e-33
Neuronal Mimicry (Synaptic)	PHC1	7.84319e-09	2.12622	0.276	0.125	0.000268394
Neuronal Mimicry (Synaptic)	ADAM23	2.41519e-29	2.11214	0.463	0.136	8.26478e-25
Neuronal Mimicry (Synaptic)	PIP4K2B	3.37443e-06	2.10649	0.276	0.151	0.115473
Neuronal Mimicry (Synaptic)	LONRF2	1.2372e-14	2.10441	0.351	0.138	4.23369e-10
Neuronal Mimicry (Synaptic)	SLC22A17	5.31237e-34	2.10043	0.53	0.157	1.81789e-29
Neuronal Mimicry (Synaptic)	TENM4	8.07865e-16	2.08764	0.373	0.142	2.76451e-11
Neuronal Mimicry (Synaptic)	FAM169A	1.30828e-20	2.07488	0.336	0.097	4.47695e-16
Neuronal Mimicry (Synaptic)	CD200	5.38528e-26	2.06794	0.284	0.061	1.84284e-21
Neuronal Mimicry (Synaptic)	TBC1D9B	3.71271e-08	2.05896	0.366	0.21	0.00127049
Neuronal Mimicry (Synaptic)	ATG16L1	3.1178e-08	2.05674	0.269	0.124	0.00106691
Neuronal Mimicry (Synaptic)	MEGF8	4.96879e-13	2.05091	0.284	0.102	1.70032e-08
Neuronal Mimicry (Synaptic)	SRGAP3	7.84396e-31	2.04927	0.582	0.222	2.6842e-26
Neuronal Mimicry (Synaptic)	EZH1	6.5606e-14	2.04704	0.388	0.169	2.24504e-09
Neuronal Mimicry (Synaptic)	ADCY3	2.12343e-12	2.04302	0.299	0.117	7.26638e-08
Neuronal Mimicry (Synaptic)	IFT172	1.52854e-15	2.03755	0.366	0.139	5.23067e-11
Neuronal Mimicry (Synaptic)	STARD9	1.29075e-13	2.03713	0.261	0.085	4.41694e-09
Neuronal Mimicry (Synaptic)	ATP8B2	2.58956e-17	2.03695	0.291	0.086	8.86147e-13
Neuronal Mimicry (Synaptic)	CCPG1	9.42169e-20	2.03192	0.56	0.279	3.2241e-15
Neuronal Mimicry (Synaptic)	PLA2G4C	5.66225e-23	2.02918	0.313	0.081	1.93762e-18
Neuronal Mimicry (Synaptic)	MRNIP	2.00722e-11	2.02759	0.343	0.152	6.86872e-07
Neuronal Mimicry (Synaptic)	MSRA	6.92748e-26	2.0216	0.687	0.367	2.37058e-21
Neuronal Mimicry (Synaptic)	NCS1	2.86342e-08	2.0204	0.276	0.126	0.000979862
Neuronal Mimicry (Synaptic)	STMN3	3.33414e-08	2.02029	0.321	0.161	0.00114094
Neuronal Mimicry (Synaptic)	CCDC92	4.01846e-11	2.01076	0.381	0.188	1.37512e-06
Neuronal Mimicry (Synaptic)	ADGRL1	3.77527e-13	2.01067	0.328	0.129	1.2919e-08
Neuronal Mimicry (Synaptic)	FAXC	1.74305e-12	2.00782	0.321	0.128	5.96473e-08
Neuronal Mimicry (Synaptic)	STMN2	2.49969e-50	2.00738	0.425	0.073	8.55395e-46
Neuronal Mimicry (Synaptic)	MAML1	9.93152e-09	2.00535	0.313	0.154	0.000339857
Neuronal Mimicry (Synaptic)	ZBTB4	3.94931e-11	2.00419	0.343	0.154	1.35145e-06
Neuronal Mimicry (Synaptic)	HYDIN	1.28819e-19	1.9946	0.269	0.067	4.40818e-15
Neuronal Mimicry (Synaptic)	GRK4	4.39865e-18	1.99357	0.351	0.115	1.50522e-13
Neuronal Mimicry (Synaptic)	LIPA	1.01315e-07	1.99269	0.284	0.138	0.003467
Neuronal Mimicry (Synaptic)	DCC	3.71273e-06	1.99236	0.254	0.13	0.12705
Neuronal Mimicry (Synaptic)	FAM171A1	4.55838e-09	1.98627	0.291	0.132	0.000155988
Neuronal Mimicry (Synaptic)	GRID1	8.79574e-22	1.98488	0.418	0.14	3.0099e-17
Neuronal Mimicry (Synaptic)	DPF3	7.30004e-09	1.9839	0.276	0.123	0.000249807
Neuronal Mimicry (Synaptic)	BDH1	7.53985e-16	1.98238	0.381	0.15	2.58014e-11
Neuronal Mimicry (Synaptic)	SYNGAP1	7.17254e-11	1.981	0.269	0.105	2.45444e-06
Neuronal Mimicry (Synaptic)	USP28	2.16846e-14	1.98025	0.358	0.14	7.42047e-10
Neuronal Mimicry (Synaptic)	STAMBPL1	1.09366e-21	1.98004	0.261	0.06	3.74249e-17
Neuronal Mimicry (Synaptic)	PPP1R16B	7.0173e-111	1.97412	0.343	0.024	2.40132e-106
Neuronal Mimicry (Synaptic)	INPP4A	1.84895e-20	1.96576	0.537	0.238	6.32709e-16
Neuronal Mimicry (Synaptic)	SSX2IP	3.08639e-08	1.96355	0.261	0.118	0.00105616
Neuronal Mimicry (Synaptic)	KCNN3	5.4506e-22	1.95816	0.261	0.059	1.8652e-17
Neuronal Mimicry (Synaptic)	DENND11	4.86171e-07	1.95744	0.299	0.156	0.0166368
Neuronal Mimicry (Synaptic)	TMEM175	1.28912e-07	1.95727	0.299	0.15	0.00441137
Neuronal Mimicry (Synaptic)	ADGRB1	2.83985e-16	1.95585	0.254	0.071	9.71796e-12
Neuronal Mimicry (Synaptic)	NAPB	8.87418e-09	1.95024	0.306	0.145	0.000303674
Neuronal Mimicry (Synaptic)	APBA2	1.11894e-26	1.9476	0.537	0.201	3.829e-22
Neuronal Mimicry (Synaptic)	SLC25A27	4.66951e-22	1.94716	0.433	0.151	1.59791e-17
Neuronal Mimicry (Synaptic)	L3MBTL1	5.97089e-08	1.94174	0.261	0.12	0.00204324
Neuronal Mimicry (Synaptic)	RNF165	5.20918e-16	1.9275	0.276	0.083	1.78258e-11
Neuronal Mimicry (Synaptic)	NRBP2	1.12185e-05	1.91254	0.284	0.158	0.383896
Neuronal Mimicry (Synaptic)	ANXA6	6.19751e-12	1.90667	0.351	0.151	2.12079e-07
Neuronal Mimicry (Synaptic)	NQO2	2.72277e-11	1.90133	0.373	0.181	9.31733e-07
Neuronal Mimicry (Synaptic)	INPP5B	5.06948e-14	1.89728	0.351	0.139	1.73478e-09
Neuronal Mimicry (Synaptic)	MINK1	6.01856e-13	1.89713	0.373	0.162	2.05955e-08
Neuronal Mimicry (Synaptic)	IDS	8.30536e-17	1.89603	0.59	0.32	2.84209e-12
Neuronal Mimicry (Synaptic)	PITRM1	3.46036e-10	1.8905	0.306	0.133	1.18413e-05
Neuronal Mimicry (Synaptic)	RNF157	9.46158e-18	1.88951	0.388	0.14	3.23775e-13
Neuronal Mimicry (Synaptic)	DKK3	4.65283e-101	1.88766	0.582	0.079	1.5922e-96
Neuronal Mimicry (Synaptic)	GRIA4	8.67157e-29	1.88156	0.575	0.202	2.96741e-24
Neuronal Mimicry (Synaptic)	EFR3B	5.58545e-16	1.87623	0.306	0.1	1.91134e-11
Neuronal Mimicry (Synaptic)	C9orf72	1.27946e-10	1.87459	0.291	0.122	4.3783e-06
Neuronal Mimicry (Synaptic)	SATB2	1.67154e-06	1.86356	0.291	0.16	0.0572002
Neuronal Mimicry (Synaptic)	SKI	1.61032e-11	1.85809	0.448	0.235	5.51051e-07
Neuronal Mimicry (Synaptic)	SERINC1	4.62997e-06	1.85428	0.5	0.366	0.158438
Neuronal Mimicry (Synaptic)	N4BP2L1	9.72301e-14	1.85372	0.336	0.127	3.32721e-09
Neuronal Mimicry (Synaptic)	GPR155	5.44538e-19	1.84654	0.418	0.146	1.86341e-14
Neuronal Mimicry (Synaptic)	KCNQ2	1.0723e-14	1.84555	0.381	0.149	3.66942e-10
Neuronal Mimicry (Synaptic)	KYAT1	2.59133e-15	1.84264	0.269	0.082	8.86753e-11
Neuronal Mimicry (Synaptic)	CNTNAP4	4.01788e-53	1.8421	0.336	0.046	1.37492e-48
Neuronal Mimicry (Synaptic)	PRKCZ	1.58153e-16	1.8328	0.396	0.156	5.41201e-12
Neuronal Mimicry (Synaptic)	RNF144A	2.92249e-14	1.82891	0.448	0.211	1.00008e-09
Neuronal Mimicry (Synaptic)	CHN1	7.78462e-10	1.82766	0.381	0.2	2.6639e-05
Neuronal Mimicry (Synaptic)	FAM13C	8.60818e-20	1.82628	0.276	0.07	2.94572e-15
Neuronal Mimicry (Synaptic)	USP11	3.04653e-08	1.82548	0.425	0.259	0.00104252
Neuronal Mimicry (Synaptic)	ARMC2	2.62773e-11	1.81441	0.276	0.104	8.99208e-07
Neuronal Mimicry (Synaptic)	SYT11	1.87245e-11	1.8122	0.448	0.219	6.40753e-07
Neuronal Mimicry (Synaptic)	GDAP1	3.8089e-21	1.80995	0.53	0.22	1.30341e-16
Neuronal Mimicry (Synaptic)	PAK1	2.26285e-11	1.80876	0.448	0.245	7.74346e-07
Neuronal Mimicry (Synaptic)	ZNF519	3.02378e-13	1.80866	0.321	0.124	1.03474e-08
Neuronal Mimicry (Synaptic)	CDYL2	1.30361e-34	1.80656	0.299	0.055	4.46094e-30
Neuronal Mimicry (Synaptic)	ARHGEF2	0.0183754	1.8019	0.276	0.223	1
Neuronal Mimicry (Synaptic)	SYNJ1	2.89417e-11	1.79796	0.343	0.153	9.90385e-07
Neuronal Mimicry (Synaptic)	SLC25A12	3.24713e-19	1.79626	0.552	0.267	1.11117e-14
Neuronal Mimicry (Synaptic)	TXNDC16	4.2935e-11	1.79191	0.299	0.121	1.46924e-06
Neuronal Mimicry (Synaptic)	MAPT	1.20632e-29	1.79004	0.612	0.228	4.12803e-25
Neuronal Mimicry (Synaptic)	HSPA4L	8.18204e-09	1.78582	0.284	0.127	0.000279989
Neuronal Mimicry (Synaptic)	ABCG1	1.76659e-12	1.78168	0.284	0.103	6.04525e-08
Neuronal Mimicry (Synaptic)	PFKM	8.94677e-10	1.78128	0.284	0.118	3.06159e-05
Neuronal Mimicry (Synaptic)	BBS1	4.17017e-08	1.77838	0.254	0.112	0.00142703
Neuronal Mimicry (Synaptic)	GOLGA8B	5.34005e-15	1.77183	0.418	0.179	1.82737e-10
Neuronal Mimicry (Synaptic)	PPM1E	3.11243e-19	1.76936	0.396	0.139	1.06507e-14
Neuronal Mimicry (Synaptic)	PLCG1	1.71664e-05	1.76501	0.284	0.162	0.587433
Neuronal Mimicry (Synaptic)	ZER1	6.25934e-11	1.76219	0.373	0.175	2.14195e-06
Neuronal Mimicry (Synaptic)	NSMF	3.13355e-08	1.76158	0.276	0.125	0.0010723
Neuronal Mimicry (Synaptic)	SEMA6D	2.06723e-10	1.75945	0.321	0.142	7.07407e-06
Neuronal Mimicry (Synaptic)	NPDC1	2.40897e-07	1.75477	0.418	0.265	0.00824351
Neuronal Mimicry (Synaptic)	ANKZF1	1.06328e-06	1.75133	0.291	0.156	0.0363856
Neuronal Mimicry (Synaptic)	ME3	1.48437e-12	1.73986	0.373	0.163	5.0795e-08
Neuronal Mimicry (Synaptic)	SH3GLB2	2.40672e-06	1.73708	0.291	0.16	0.0823579
Neuronal Mimicry (Synaptic)	ELAVL4	6.19547e-13	1.73407	0.299	0.105	2.12009e-08
Neuronal Mimicry (Synaptic)	TSC1	4.39634e-13	1.72366	0.396	0.175	1.50443e-08
Neuronal Mimicry (Synaptic)	SEPTIN8	4.50983e-08	1.7113	0.276	0.125	0.00154327
Neuronal Mimicry (Synaptic)	GTF2A1	2.50266e-05	1.70994	0.291	0.174	0.856411
Neuronal Mimicry (Synaptic)	TCP11L1	4.99008e-08	1.70984	0.269	0.123	0.00170761
Neuronal Mimicry (Synaptic)	CEP126	3.55967e-13	1.709	0.284	0.099	1.21812e-08
Neuronal Mimicry (Synaptic)	ELP1	3.43306e-09	1.70765	0.351	0.173	0.000117479
Neuronal Mimicry (Synaptic)	CASTOR2	7.36017e-11	1.7044	0.284	0.114	2.51865e-06
Neuronal Mimicry (Synaptic)	BRF1	1.59516e-05	1.70426	0.276	0.155	0.545864
Neuronal Mimicry (Synaptic)	SOCS7	3.29998e-05	1.69689	0.254	0.141	1
Neuronal Mimicry (Synaptic)	CRY2	1.18359e-09	1.69543	0.291	0.125	4.05024e-05
Neuronal Mimicry (Synaptic)	HECTD2	6.98877e-11	1.69429	0.358	0.167	2.39156e-06
Neuronal Mimicry (Synaptic)	PEA15	9.02155e-07	1.69075	0.396	0.251	0.0308717
Neuronal Mimicry (Synaptic)	CC2D1A	2.49869e-06	1.6898	0.306	0.172	0.0855052
Neuronal Mimicry (Synaptic)	CTSF	0.000100669	1.67555	0.284	0.175	1
Neuronal Mimicry (Synaptic)	RALGDS	1.98598e-10	1.67506	0.366	0.175	6.79601e-06
Neuronal Mimicry (Synaptic)	TRIM9	1.8023e-33	1.67265	0.679	0.274	6.16748e-29
Neuronal Mimicry (Synaptic)	SEZ6L2	3.28875e-11	1.67159	0.366	0.163	1.12541e-06
Neuronal Mimicry (Synaptic)	TMEM94	2.09131e-05	1.67037	0.254	0.139	0.715647
Neuronal Mimicry (Synaptic)	TRPC1	1.97362e-13	1.66969	0.403	0.181	6.75371e-09
Neuronal Mimicry (Synaptic)	LRRTM3	1.60107e-11	1.6693	0.328	0.135	5.47887e-07
Neuronal Mimicry (Synaptic)	RUFY2	7.23255e-10	1.66818	0.425	0.239	2.47498e-05
Neuronal Mimicry (Synaptic)	HABP4	3.95743e-08	1.66664	0.313	0.153	0.00135423
Neuronal Mimicry (Synaptic)	ZNF337	5.56267e-07	1.66649	0.343	0.196	0.0190355
Neuronal Mimicry (Synaptic)	SLC17A5	2.00362e-07	1.66615	0.261	0.123	0.00685638
Neuronal Mimicry (Synaptic)	FBXO31	1.24323e-06	1.66078	0.269	0.137	0.0425434
Neuronal Mimicry (Synaptic)	CBX6	0.000115165	1.65447	0.284	0.174	1
Neuronal Mimicry (Synaptic)	TTLL11	2.22844e-10	1.65232	0.284	0.115	7.62574e-06
Neuronal Mimicry (Synaptic)	FBXO16	5.74282e-10	1.65179	0.261	0.1	1.96519e-05
Neuronal Mimicry (Synaptic)	SPATA7	2.26337e-13	1.64822	0.343	0.136	7.74524e-09
Neuronal Mimicry (Synaptic)	YPEL2	5.05486e-09	1.64525	0.254	0.105	0.000172977
Neuronal Mimicry (Synaptic)	PPP3CB	2.14507e-09	1.64442	0.433	0.25	7.34045e-05
Neuronal Mimicry (Synaptic)	POLR3A	6.25954e-09	1.63956	0.299	0.137	0.000214201
Neuronal Mimicry (Synaptic)	TRAPPC6B	3.89849e-06	1.63733	0.313	0.181	0.133406
Neuronal Mimicry (Synaptic)	THRA	8.87587e-06	1.63567	0.306	0.179	0.303732
Neuronal Mimicry (Synaptic)	JAKMIP2	1.47641e-26	1.63432	0.485	0.168	5.05226e-22
Neuronal Mimicry (Synaptic)	USP45	5.86416e-06	1.63408	0.299	0.166	0.200672
Neuronal Mimicry (Synaptic)	TBC1D2B	7.32977e-09	1.63225	0.284	0.128	0.000250825
Neuronal Mimicry (Synaptic)	GBA2	8.82709e-07	1.62786	0.269	0.137	0.0302063
Neuronal Mimicry (Synaptic)	GRINA	0.00178963	1.62491	0.358	0.288	1
Neuronal Mimicry (Synaptic)	COQ8A	6.84307e-05	1.62089	0.254	0.145	1
Neuronal Mimicry (Synaptic)	OGFR	0.00277945	1.61733	0.261	0.178	1
Neuronal Mimicry (Synaptic)	DGCR8	1.25481e-06	1.61632	0.291	0.154	0.0429394
Neuronal Mimicry (Synaptic)	MAP7D1	0.00123709	1.6132	0.261	0.174	1
Neuronal Mimicry (Synaptic)	RRAGD	6.45137e-05	1.61193	0.254	0.145	1
Neuronal Mimicry (Synaptic)	ZFYVE9	6.21313e-12	1.60915	0.44	0.226	2.12613e-07
Neuronal Mimicry (Synaptic)	ZDHHC2	1.91102e-07	1.60785	0.261	0.118	0.00653952
Neuronal Mimicry (Synaptic)	ATP6V0A1	1.6205e-14	1.60675	0.552	0.303	5.54533e-10
Neuronal Mimicry (Synaptic)	SH2B1	1.90033e-06	1.59863	0.313	0.173	0.0650291
Neuronal Mimicry (Synaptic)	AACS	6.45312e-10	1.59761	0.306	0.133	2.20826e-05
Neuronal Mimicry (Synaptic)	MXRA7	4.37854e-06	1.59534	0.306	0.173	0.149834
Neuronal Mimicry (Synaptic)	KIF3A	5.075e-15	1.59346	0.5	0.242	1.73666e-10
Neuronal Mimicry (Synaptic)	DDHD1	7.58786e-13	1.59226	0.455	0.221	2.59657e-08
Neuronal Mimicry (Synaptic)	SCN1A	4.26348e-16	1.58804	0.388	0.146	1.45896e-11
Neuronal Mimicry (Synaptic)	RETREG1	4.78332e-07	1.58795	0.269	0.128	0.0163685
Neuronal Mimicry (Synaptic)	RUSC1	3.46397e-06	1.58393	0.254	0.13	0.118537
Neuronal Mimicry (Synaptic)	ANKRD13D	3.0272e-06	1.58216	0.321	0.184	0.103591
Neuronal Mimicry (Synaptic)	CAMK2G	4.31299e-07	1.57858	0.328	0.18	0.0147591
Neuronal Mimicry (Synaptic)	GGT7	6.1519e-11	1.57508	0.388	0.188	2.10518e-06
Neuronal Mimicry (Synaptic)	TCEAL2	5.65225e-08	1.57395	0.254	0.11	0.0019342
Neuronal Mimicry (Synaptic)	CEP164	1.70239e-06	1.57326	0.336	0.188	0.0582559
Neuronal Mimicry (Synaptic)	GRIPAP1	4.56397e-09	1.57035	0.388	0.211	0.000156179
Neuronal Mimicry (Synaptic)	PRKACB	6.13636e-22	1.56892	0.612	0.299	2.09986e-17
Neuronal Mimicry (Synaptic)	INTS11	8.40691e-05	1.56616	0.336	0.225	1
Neuronal Mimicry (Synaptic)	EPB41L4B	3.17495e-22	1.561	0.343	0.1	1.08647e-17
Neuronal Mimicry (Synaptic)	ZSCAN26	9.17643e-07	1.56003	0.269	0.131	0.0314017
Neuronal Mimicry (Synaptic)	SAMD8	2.62812e-05	1.56002	0.299	0.175	0.899343
Neuronal Mimicry (Synaptic)	RNLS	1.64347e-20	1.55866	0.328	0.094	5.62395e-16
Neuronal Mimicry (Synaptic)	LANCL1	1.94301e-08	1.55848	0.351	0.181	0.000664898
Neuronal Mimicry (Synaptic)	CHD3	0.00488067	1.55653	0.306	0.224	1
Neuronal Mimicry (Synaptic)	DDHD2	7.70165e-07	1.5554	0.313	0.166	0.0263551
Neuronal Mimicry (Synaptic)	NSF	3.28766e-07	1.55527	0.373	0.223	0.0112504
Neuronal Mimicry (Synaptic)	DNM1L	2.82952e-11	1.55151	0.537	0.317	9.6826e-07
Neuronal Mimicry (Synaptic)	PEX3	1.21172e-06	1.54735	0.276	0.139	0.0414652
Neuronal Mimicry (Synaptic)	CMTR1	1.91131e-10	1.54474	0.313	0.134	6.54049e-06
Neuronal Mimicry (Synaptic)	GARNL3	4.98641e-26	1.54408	0.433	0.135	1.70635e-21
Neuronal Mimicry (Synaptic)	DZIP3	1.20053e-06	1.54	0.321	0.182	0.0410822
Neuronal Mimicry (Synaptic)	PHLPP2	3.77155e-12	1.53898	0.299	0.112	1.29063e-07
Neuronal Mimicry (Synaptic)	CCDC82	5.85025e-08	1.53764	0.403	0.239	0.00200195
Neuronal Mimicry (Synaptic)	PXK	2.38852e-06	1.5349	0.299	0.162	0.081735
Neuronal Mimicry (Synaptic)	WASF3	1.30091e-06	1.53147	0.284	0.143	0.0445171
Neuronal Mimicry (Synaptic)	TTLL7	4.76642e-46	1.52692	0.604	0.178	1.63107e-41
Neuronal Mimicry (Synaptic)	ZNF493	3.44957e-06	1.52543	0.321	0.188	0.118044
Neuronal Mimicry (Synaptic)	TSNARE1	2.63491e-08	1.5247	0.276	0.125	0.000901665
Neuronal Mimicry (Synaptic)	KLHDC3	9.03163e-06	1.52345	0.351	0.22	0.309062
Neuronal Mimicry (Synaptic)	PHACTR3	1.56967e-13	1.52174	0.425	0.185	5.3714e-09
Neuronal Mimicry (Synaptic)	DHDDS	7.73594e-05	1.51994	0.276	0.161	1
Neuronal Mimicry (Synaptic)	DNAJB2	0.000131151	1.51868	0.284	0.172	1
Neuronal Mimicry (Synaptic)	CALCOCO2	1.09567e-05	1.51624	0.358	0.231	0.374938
Neuronal Mimicry (Synaptic)	CORO2B	7.58006e-21	1.51507	0.373	0.111	2.5939e-16
Neuronal Mimicry (Synaptic)	NDRG3	0.000304515	1.51488	0.269	0.168	1
Neuronal Mimicry (Synaptic)	MMS19	3.15176e-05	1.51472	0.313	0.194	1
Neuronal Mimicry (Synaptic)	AKAP11	9.0311e-07	1.51257	0.396	0.239	0.0309044
Neuronal Mimicry (Synaptic)	SLC35A1	3.73494e-11	1.51153	0.373	0.175	1.27809e-06
Neuronal Mimicry (Synaptic)	CHIC1	0.00154326	1.51081	0.254	0.165	1
Neuronal Mimicry (Synaptic)	TANGO6	0.00134048	1.50526	0.269	0.177	1
Neuronal Mimicry (Synaptic)	XPA	1.54148e-05	1.49595	0.343	0.213	0.527493
Neuronal Mimicry (Synaptic)	VPS9D1	3.85468e-08	1.48896	0.284	0.129	0.00131907
Neuronal Mimicry (Synaptic)	PISD	0.000273776	1.48773	0.276	0.177	1
Neuronal Mimicry (Synaptic)	KDM5C	0.00053559	1.48068	0.306	0.21	1
Neuronal Mimicry (Synaptic)	SH3BGRL2	2.07571e-13	1.47984	0.254	0.083	7.10309e-09
Neuronal Mimicry (Synaptic)	TMEM120B	2.53739e-09	1.47858	0.351	0.171	8.68295e-05
Neuronal Mimicry (Synaptic)	GDPD1	3.0258e-07	1.47826	0.254	0.115	0.0103543
Neuronal Mimicry (Synaptic)	CDS2	7.28861e-06	1.47483	0.373	0.239	0.249416
Neuronal Mimicry (Synaptic)	PLD3	6.31932e-11	1.47275	0.582	0.385	2.16247e-06
Neuronal Mimicry (Synaptic)	DIPK1A	4.3254e-10	1.46104	0.358	0.166	1.48015e-05
Neuronal Mimicry (Synaptic)	CRELD1	1.26224e-05	1.4569	0.254	0.134	0.431939
Neuronal Mimicry (Synaptic)	SNRPN	1.59915e-07	1.45087	0.463	0.309	0.00547228
Neuronal Mimicry (Synaptic)	P4HTM	3.035e-07	1.4423	0.321	0.166	0.0103858
Neuronal Mimicry (Synaptic)	AKT2	2.90941e-05	1.44069	0.351	0.225	0.995601
Neuronal Mimicry (Synaptic)	MAN1B1	0.00105198	1.43989	0.254	0.164	1
Neuronal Mimicry (Synaptic)	SELENOO	0.000120074	1.43896	0.284	0.175	1
Neuronal Mimicry (Synaptic)	ATP1B2	1.03636e-05	1.43245	0.254	0.133	0.354642
Neuronal Mimicry (Synaptic)	PLEKHM3	1.90549e-08	1.4312	0.328	0.161	0.000652059
Neuronal Mimicry (Synaptic)	HDGFL3	3.58232e-06	1.43058	0.373	0.227	0.122587
Neuronal Mimicry (Synaptic)	PKNOX2	3.58054e-10	1.42806	0.291	0.117	1.22526e-05
Neuronal Mimicry (Synaptic)	DNHD1	3.49624e-07	1.42517	0.291	0.145	0.0119641
Neuronal Mimicry (Synaptic)	RAB11FIP3	2.88333e-09	1.42423	0.403	0.213	9.86674e-05
Neuronal Mimicry (Synaptic)	UCHL1	3.23818e-09	1.42317	0.463	0.252	0.000110811
Neuronal Mimicry (Synaptic)	INPP5F	1.4642e-06	1.42201	0.328	0.189	0.0501048
Neuronal Mimicry (Synaptic)	ZSWIM8	0.00011284	1.41955	0.254	0.147	1
Neuronal Mimicry (Synaptic)	SEZ6L	1.59183e-22	1.41861	0.44	0.139	5.44723e-18
Neuronal Mimicry (Synaptic)	CAMSAP1	3.13606e-07	1.41824	0.321	0.17	0.0107316
Neuronal Mimicry (Synaptic)	ITPK1	0.00010456	1.4176	0.299	0.179	1
Neuronal Mimicry (Synaptic)	YTHDC2	1.17469e-07	1.41521	0.448	0.293	0.00401977
Neuronal Mimicry (Synaptic)	MAPK9	1.5624e-09	1.41168	0.366	0.185	5.34654e-05
Neuronal Mimicry (Synaptic)	TAGLN3	1.94582e-09	1.41056	0.254	0.1	6.6586e-05
Neuronal Mimicry (Synaptic)	ZNF318	1.28807e-07	1.4011	0.261	0.123	0.00440779
Neuronal Mimicry (Synaptic)	TMTC3	4.71906e-06	1.4	0.269	0.137	0.161486
Neuronal Mimicry (Synaptic)	GOLGA8A	1.95529e-06	1.39988	0.291	0.158	0.0669102
Neuronal Mimicry (Synaptic)	ARRB1	5.62588e-08	1.39871	0.276	0.124	0.00192518
Neuronal Mimicry (Synaptic)	CEP250	8.11138e-09	1.39703	0.291	0.13	0.000277572
Neuronal Mimicry (Synaptic)	CEP68	6.14398e-07	1.39498	0.299	0.152	0.0210247
Neuronal Mimicry (Synaptic)	SMAP2	7.15543e-09	1.39345	0.373	0.19	0.000244859
Neuronal Mimicry (Synaptic)	BTBD2	0.000451489	1.38579	0.284	0.188	1
Neuronal Mimicry (Synaptic)	AMFR	0.0118457	1.38361	0.254	0.189	1
Neuronal Mimicry (Synaptic)	BRD1	2.17827e-06	1.38155	0.313	0.177	0.0745403
Neuronal Mimicry (Synaptic)	ATP6V1B2	6.9281e-10	1.37227	0.433	0.229	2.3708e-05
Neuronal Mimicry (Synaptic)	RMND5A	0.0252515	1.37008	0.254	0.197	1
Neuronal Mimicry (Synaptic)	SPSB3	0.00724208	1.36895	0.306	0.241	1
Neuronal Mimicry (Synaptic)	GIGYF1	0.000140734	1.36563	0.328	0.222	1
Neuronal Mimicry (Synaptic)	HTT	2.60388e-06	1.36394	0.463	0.331	0.0891048
Neuronal Mimicry (Synaptic)	PURA	0.000817012	1.36338	0.388	0.302	1
Neuronal Mimicry (Synaptic)	FAT3	8.8013e-10	1.36261	0.328	0.149	3.0118e-05
Neuronal Mimicry (Synaptic)	NIPAL3	0.000285446	1.35979	0.269	0.164	1
Neuronal Mimicry (Synaptic)	KCNC2	1.92378e-211	1.3557	0.328	0.01	6.58318e-207
Neuronal Mimicry (Synaptic)	DEPDC5	6.7053e-07	1.35411	0.291	0.148	0.0229455
Neuronal Mimicry (Synaptic)	NFE2L1	0.0359959	1.34758	0.261	0.216	1
Neuronal Mimicry (Synaptic)	ZYG11B	5.15741e-06	1.34479	0.373	0.231	0.176487
Neuronal Mimicry (Synaptic)	TRIM37	7.36951e-10	1.34145	0.433	0.237	2.52185e-05
Neuronal Mimicry (Synaptic)	PWWP3A	0.0124678	1.34001	0.313	0.252	1
Neuronal Mimicry (Synaptic)	BAIAP2	0.00025932	1.33325	0.343	0.236	1
Neuronal Mimicry (Synaptic)	CUL2	0.000167843	1.33266	0.306	0.189	1
Neuronal Mimicry (Synaptic)	CASC3	0.0108355	1.33106	0.299	0.232	1
Neuronal Mimicry (Synaptic)	PLEKHA1	5.42978e-07	1.33069	0.358	0.209	0.0185807
Neuronal Mimicry (Synaptic)	ATG2B	7.03796e-11	1.33043	0.41	0.206	2.40839e-06
Neuronal Mimicry (Synaptic)	MTOR	7.09417e-06	1.32832	0.358	0.218	0.242762
Neuronal Mimicry (Synaptic)	SCRN1	1.44145e-09	1.32831	0.41	0.217	4.93266e-05
Neuronal Mimicry (Synaptic)	SFI1	4.85123e-05	1.32817	0.261	0.148	1
Neuronal Mimicry (Synaptic)	TNK2	0.000167571	1.32649	0.299	0.183	1
Neuronal Mimicry (Synaptic)	PRMT7	0.0002172	1.32506	0.276	0.169	1
Neuronal Mimicry (Synaptic)	DPYSL2	2.62446e-09	1.32405	0.567	0.378	8.9809e-05
Neuronal Mimicry (Synaptic)	FGFR1	0.00899307	1.32091	0.276	0.207	1
Neuronal Mimicry (Synaptic)	TMEM260	3.70547e-06	1.31351	0.358	0.215	0.126801
Neuronal Mimicry (Synaptic)	MINDY2	6.21072e-05	1.31346	0.373	0.255	1
Neuronal Mimicry (Synaptic)	METTL17	2.49283e-05	1.31195	0.284	0.164	0.853046
Neuronal Mimicry (Synaptic)	GNAI1	7.50076e-05	1.31166	0.336	0.209	1
Neuronal Mimicry (Synaptic)	KMT2D	0.000511213	1.30698	0.254	0.156	1
Neuronal Mimicry (Synaptic)	GGA2	2.30421e-05	1.30542	0.373	0.248	0.788499
Neuronal Mimicry (Synaptic)	PTPRS	1.2391e-09	1.3046	0.515	0.314	4.2402e-05
Neuronal Mimicry (Synaptic)	ABCC5	1.16464e-11	1.30172	0.455	0.233	3.98538e-07
Neuronal Mimicry (Synaptic)	AHDC1	9.29882e-07	1.30038	0.299	0.161	0.0318206
Neuronal Mimicry (Synaptic)	PRPF39	1.82641e-07	1.29772	0.373	0.214	0.00624998
Neuronal Mimicry (Synaptic)	SNRK	0.0183947	1.29465	0.261	0.2	1
Neuronal Mimicry (Synaptic)	AGO4	2.04123e-06	1.2934	0.358	0.202	0.0698507
Neuronal Mimicry (Synaptic)	SARM1	2.35035e-09	1.29302	0.261	0.102	8.0429e-05
Neuronal Mimicry (Synaptic)	TCAF1	0.0200325	1.29173	0.313	0.262	1
Neuronal Mimicry (Synaptic)	DHX30	0.00360257	1.29133	0.321	0.242	1
Neuronal Mimicry (Synaptic)	LMBRD2	3.1998e-06	1.28931	0.291	0.155	0.109497
Neuronal Mimicry (Synaptic)	SDR39U1	0.00441763	1.28287	0.276	0.202	1
Neuronal Mimicry (Synaptic)	CPEB3	7.56041e-11	1.2816	0.396	0.194	2.58717e-06
Neuronal Mimicry (Synaptic)	LTBP3	0.0149687	1.2809	0.336	0.274	1
Neuronal Mimicry (Synaptic)	JMY	7.96377e-05	1.27679	0.306	0.185	1
Neuronal Mimicry (Synaptic)	WDR19	8.09625e-09	1.27415	0.306	0.139	0.000277054
Neuronal Mimicry (Synaptic)	ACOT7	4.19863e-05	1.27244	0.313	0.185	1
Neuronal Mimicry (Synaptic)	YPEL3	0.200745	1.27187	0.276	0.266	1
Neuronal Mimicry (Synaptic)	LMTK2	2.88779e-10	1.2673	0.493	0.28	9.88202e-06
Neuronal Mimicry (Synaptic)	MTMR4	4.77733e-05	1.2671	0.306	0.183	1
Neuronal Mimicry (Synaptic)	EEF2K	0.000402299	1.26233	0.284	0.18	1
Neuronal Mimicry (Synaptic)	USP4	0.0258296	1.26194	0.276	0.218	1
Neuronal Mimicry (Synaptic)	SS18L1	0.00156664	1.25653	0.254	0.165	1
Neuronal Mimicry (Synaptic)	TXNDC15	0.00285107	1.25428	0.284	0.201	1
Neuronal Mimicry (Synaptic)	STX2	5.16919e-06	1.25252	0.254	0.126	0.17689
Neuronal Mimicry (Synaptic)	MPHOSPH9	2.61511e-07	1.24782	0.373	0.207	0.0089489
Neuronal Mimicry (Synaptic)	NDUFAF7	3.03239e-06	1.24503	0.261	0.132	0.103768
Neuronal Mimicry (Synaptic)	ANKAR	0.000390114	1.24358	0.269	0.165	1
Neuronal Mimicry (Synaptic)	MIGA1	0.003096	1.24186	0.313	0.224	1
Neuronal Mimicry (Synaptic)	PLEKHM2	0.00253622	1.24108	0.276	0.191	1
Neuronal Mimicry (Synaptic)	SIN3A	0.00366983	1.2374	0.284	0.203	1
Neuronal Mimicry (Synaptic)	SERINC3	0.201304	1.22898	0.336	0.324	1
Neuronal Mimicry (Synaptic)	WDR44	0.00113964	1.22362	0.261	0.163	1
Neuronal Mimicry (Synaptic)	BTRC	1.2401e-08	1.22339	0.463	0.287	0.000424362
Neuronal Mimicry (Synaptic)	TOM1L2	8.86007e-05	1.22208	0.358	0.241	1
Neuronal Mimicry (Synaptic)	RAVER2	9.95275e-08	1.21852	0.261	0.119	0.00340583
Neuronal Mimicry (Synaptic)	SNRNP70	1.71318e-05	1.2185	0.582	0.501	0.586251
Neuronal Mimicry (Synaptic)	STMN4	1.7062e-09	1.21647	0.306	0.128	5.83862e-05
Neuronal Mimicry (Synaptic)	MFSD6	0.000333851	1.21629	0.313	0.211	1
Neuronal Mimicry (Synaptic)	FZD3	3.51234e-07	1.21416	0.366	0.197	0.0120192
Neuronal Mimicry (Synaptic)	RNF146	0.00189102	1.21359	0.291	0.198	1
Neuronal Mimicry (Synaptic)	BSCL2	4.93795e-09	1.21139	0.366	0.183	0.000168977
Neuronal Mimicry (Synaptic)	AKAP8L	0.00252245	1.21057	0.358	0.288	1
Neuronal Mimicry (Synaptic)	EEF1AKMT2	1.7976e-08	1.20978	0.381	0.21	0.000615139
Neuronal Mimicry (Synaptic)	ABAT	0.000244772	1.20878	0.254	0.149	1
Neuronal Mimicry (Synaptic)	PRKAR2B	8.57968e-15	1.20797	0.321	0.116	2.93597e-10
Neuronal Mimicry (Synaptic)	MFSD1	0.00104435	1.20779	0.284	0.187	1
Neuronal Mimicry (Synaptic)	LRP1	8.74715e-11	1.20692	0.485	0.253	2.99328e-06
Neuronal Mimicry (Synaptic)	DNM2	0.000141165	1.20093	0.403	0.29	1
Neuronal Mimicry (Synaptic)	FAM228B	0.0176609	1.19905	0.269	0.206	1
Neuronal Mimicry (Synaptic)	RALGPS1	3.51921e-17	1.19849	0.478	0.216	1.20427e-12
Neuronal Mimicry (Synaptic)	TTC8	4.81154e-05	1.19793	0.284	0.168	1
Neuronal Mimicry (Synaptic)	NR2C1	1.48867e-06	1.19715	0.336	0.19	0.0509424
Neuronal Mimicry (Synaptic)	AGO1	0.000303798	1.19517	0.261	0.155	1
Neuronal Mimicry (Synaptic)	PGP	0.00309978	1.19442	0.321	0.236	1
Neuronal Mimicry (Synaptic)	MAP1LC3A	0.000409181	1.19135	0.351	0.247	1
Neuronal Mimicry (Synaptic)	WDR37	1.49301e-06	1.18735	0.366	0.218	0.051091
Neuronal Mimicry (Synaptic)	KLHL2	9.45738e-07	1.18089	0.328	0.181	0.0323631
Neuronal Mimicry (Synaptic)	NAPA	0.000249249	1.18048	0.381	0.274	1
Neuronal Mimicry (Synaptic)	ACO1	0.000409313	1.17638	0.269	0.17	1
Neuronal Mimicry (Synaptic)	BSDC1	0.00596219	1.17576	0.328	0.262	1
Neuronal Mimicry (Synaptic)	STRADA	0.000107965	1.17235	0.313	0.192	1
Neuronal Mimicry (Synaptic)	QTRT1	0.00263182	1.17118	0.366	0.29	1
Neuronal Mimicry (Synaptic)	LUC7L	4.43285e-07	1.17025	0.545	0.406	0.0151692
Neuronal Mimicry (Synaptic)	CDH8	1.03693e-28	1.1671	0.254	0.047	3.54838e-24
Neuronal Mimicry (Synaptic)	UBE2O	1.89066e-06	1.1643	0.373	0.228	0.0646984
Neuronal Mimicry (Synaptic)	SAP130	0.00194131	1.15917	0.254	0.164	1
Neuronal Mimicry (Synaptic)	LRP11	1.22151e-05	1.15665	0.261	0.14	0.418001
Neuronal Mimicry (Synaptic)	GDI1	7.97801e-05	1.15606	0.425	0.327	1
Neuronal Mimicry (Synaptic)	L3HYPDH	2.21958e-06	1.15587	0.261	0.128	0.0759541
Neuronal Mimicry (Synaptic)	CDK5RAP1	0.00123093	1.15551	0.299	0.204	1
Neuronal Mimicry (Synaptic)	NOL4	5.82168e-10	1.15523	0.388	0.184	1.99218e-05
Neuronal Mimicry (Synaptic)	ASXL3	4.78073e-08	1.15449	0.269	0.115	0.00163597
Neuronal Mimicry (Synaptic)	NCLN	0.0027734	1.15242	0.254	0.17	1
Neuronal Mimicry (Synaptic)	RABL6	0.00405992	1.14819	0.373	0.3	1
Neuronal Mimicry (Synaptic)	QRICH1	7.90872e-05	1.14772	0.328	0.21	1
Neuronal Mimicry (Synaptic)	MAN1A1	7.36924e-21	1.14722	0.284	0.074	2.52175e-16
Neuronal Mimicry (Synaptic)	TAPT1	0.000857044	1.14558	0.299	0.199	1
Neuronal Mimicry (Synaptic)	MVB12B	9.39745e-07	1.14441	0.351	0.195	0.0321581
Neuronal Mimicry (Synaptic)	SLC7A6	0.000216469	1.14433	0.269	0.159	1
Neuronal Mimicry (Synaptic)	PLXNB2	0.0322984	1.14168	0.269	0.22	1
Neuronal Mimicry (Synaptic)	INTS4	0.00159616	1.1343	0.284	0.189	1
Neuronal Mimicry (Synaptic)	SLC6A15	2.96814e-37	1.12283	0.284	0.047	1.0157e-32
Neuronal Mimicry (Synaptic)	DDX19A	0.00239041	1.12221	0.276	0.186	1
Neuronal Mimicry (Synaptic)	NDFIP2	0.00257626	1.117	0.313	0.219	1
Neuronal Mimicry (Synaptic)	ZMIZ2	0.00108281	1.11344	0.299	0.202	1
Neuronal Mimicry (Synaptic)	KAT7	0.00125428	1.11218	0.299	0.203	1
Neuronal Mimicry (Synaptic)	FBXO3	4.23136e-05	1.11114	0.306	0.183	1
Neuronal Mimicry (Synaptic)	NEK9	0.0070781	1.10937	0.284	0.208	1
Neuronal Mimicry (Synaptic)	LATS1	0.000113685	1.10611	0.336	0.217	1
Neuronal Mimicry (Synaptic)	TEX2	0.00225252	1.10478	0.254	0.169	1
Neuronal Mimicry (Synaptic)	CDC40	0.0619938	1.10444	0.254	0.21	1
Neuronal Mimicry (Synaptic)	ULK2	7.10011e-11	1.10416	0.343	0.15	2.42966e-06
Neuronal Mimicry (Synaptic)	TRAPPC12	3.14108e-05	1.10372	0.433	0.307	1
Neuronal Mimicry (Synaptic)	SORL1	6.46698e-14	1.10369	0.455	0.217	2.213e-09
Neuronal Mimicry (Synaptic)	PER3	2.69798e-07	1.09896	0.321	0.165	0.00923249
Neuronal Mimicry (Synaptic)	SPATA6L	1.79814e-09	1.09887	0.261	0.102	6.15324e-05
Neuronal Mimicry (Synaptic)	PLEKHH1	1.86331e-08	1.09885	0.276	0.122	0.000637626
Neuronal Mimicry (Synaptic)	DGLUCY	5.95212e-07	1.094	0.328	0.173	0.0203682
Neuronal Mimicry (Synaptic)	LNX1	1.10443e-10	1.09117	0.306	0.126	3.77935e-06
Neuronal Mimicry (Synaptic)	RUFY1	0.000716339	1.08318	0.343	0.238	1
Neuronal Mimicry (Synaptic)	NELFA	0.00910157	1.08007	0.284	0.209	1
Neuronal Mimicry (Synaptic)	TECPR2	0.000824409	1.07699	0.299	0.201	1
Neuronal Mimicry (Synaptic)	BBS2	3.62196e-07	1.07404	0.358	0.193	0.0123944
Neuronal Mimicry (Synaptic)	KLHDC2	0.00783669	1.07402	0.373	0.297	1
Neuronal Mimicry (Synaptic)	DPP6	2.17181e-24	1.07154	0.694	0.292	7.43192e-20
Neuronal Mimicry (Synaptic)	GPALPP1	0.000407099	1.06682	0.299	0.193	1
Neuronal Mimicry (Synaptic)	FXYD6	1.43265e-05	1.06662	0.366	0.219	0.490254
Neuronal Mimicry (Synaptic)	NR1D2	0.0396705	1.06558	0.269	0.215	1
Neuronal Mimicry (Synaptic)	SEC16A	0.0418852	1.06476	0.254	0.203	1
Neuronal Mimicry (Synaptic)	ARMH3	0.000135363	1.06096	0.351	0.233	1
Neuronal Mimicry (Synaptic)	GINM1	0.0131169	1.0592	0.299	0.219	1
Neuronal Mimicry (Synaptic)	OBSL1	0.0015541	1.05472	0.284	0.19	1
Neuronal Mimicry (Synaptic)	FAM193B	0.000179993	1.0524	0.284	0.174	1
Neuronal Mimicry (Synaptic)	PPM1K	3.23147e-07	1.04762	0.373	0.208	0.0110581
Neuronal Mimicry (Synaptic)	MAP3K3	6.31428e-06	1.04735	0.284	0.153	0.216075
Neuronal Mimicry (Synaptic)	ZNF782	0.000545277	1.037	0.254	0.153	1
Neuronal Mimicry (Synaptic)	ZNF529	0.00374178	1.0365	0.254	0.165	1
Neuronal Mimicry (Synaptic)	ST7	0.00067891	1.03222	0.328	0.227	1
Neuronal Mimicry (Synaptic)	BICDL1	2.05426e-25	1.03068	0.366	0.1	7.02969e-21
Neuronal Mimicry (Synaptic)	GSTA4	7.28046e-06	1.02959	0.381	0.23	0.249137
Neuronal Mimicry (Synaptic)	ATN1	5.38482e-05	1.02667	0.321	0.21	1
Neuronal Mimicry (Synaptic)	NUP93	0.0185694	1.01785	0.284	0.221	1
Neuronal Mimicry (Synaptic)	PRPF40B	0.000850275	1.0176	0.321	0.216	1
Neuronal Mimicry (Synaptic)	CROCC	6.59275e-05	1.01737	0.261	0.144	1
Neuronal Mimicry (Synaptic)	PRPF19	0.00434096	1.01576	0.254	0.175	1
Neuronal Mimicry (Synaptic)	ZNF133	7.10039e-06	1.0083	0.291	0.156	0.242975
Neuronal Mimicry (Synaptic)	KIAA0825	2.90919e-08	1.00806	0.351	0.181	0.000995523
Neuronal Mimicry (Synaptic)	SIMC1	1.09374e-05	1.00342	0.284	0.156	0.374279
Neuronal Mimicry (Synaptic)	PITPNM2	1.24477e-09	1.00259	0.299	0.13	4.2596e-05
Neuronal Mimicry (Synaptic)	SZT2	0.00289092	1.00109	0.254	0.164	1
Neuronal Mimicry (Synaptic)	PCID2	0.0754915	0.998495	0.299	0.246	1
Neuronal Mimicry (Synaptic)	TMEM248	0.390549	0.998423	0.261	0.32	1
Neuronal Mimicry (Synaptic)	BMERB1	1.33903e-05	0.99766	0.388	0.245	0.458216
Neuronal Mimicry (Synaptic)	CHFR	0.011099	0.992909	0.269	0.196	1
Neuronal Mimicry (Synaptic)	CRBN	0.155475	0.992832	0.299	0.27	1
Neuronal Mimicry (Synaptic)	TRAK2	0.000100773	0.991365	0.328	0.204	1
Neuronal Mimicry (Synaptic)	EXOC7	0.232221	0.990834	0.269	0.254	1
Neuronal Mimicry (Synaptic)	VAMP2	0.139821	0.988658	0.388	0.383	1
Neuronal Mimicry (Synaptic)	SNCA	6.0588e-11	0.984058	0.358	0.149	2.07332e-06
Neuronal Mimicry (Synaptic)	EXOSC10	0.000132162	0.9823	0.343	0.228	1
Neuronal Mimicry (Synaptic)	CFAP298	0.0563153	0.980033	0.299	0.252	1
Neuronal Mimicry (Synaptic)	COX10	0.00153626	0.975463	0.261	0.167	1
Neuronal Mimicry (Synaptic)	DSCAML1	3.88883e-15	0.973786	0.351	0.125	1.33076e-10
Neuronal Mimicry (Synaptic)	HGS	0.0350446	0.971345	0.284	0.232	1
Neuronal Mimicry (Synaptic)	NDUFV1	0.481559	0.969844	0.388	0.425	1
Neuronal Mimicry (Synaptic)	UTP6	0.00317237	0.968904	0.306	0.219	1
Neuronal Mimicry (Synaptic)	OPTN	1.65712e-06	0.968737	0.351	0.203	0.0567067
Neuronal Mimicry (Synaptic)	ABCD4	0.00233818	0.965789	0.254	0.165	1
Neuronal Mimicry (Synaptic)	WIPF2	0.00217068	0.965481	0.358	0.27	1
Neuronal Mimicry (Synaptic)	ZCCHC14	0.000203525	0.963439	0.306	0.188	1
Neuronal Mimicry (Synaptic)	ANKRD26	3.32959e-07	0.962176	0.44	0.279	0.0113939
Neuronal Mimicry (Synaptic)	SLC36A4	0.000943943	0.961894	0.321	0.219	1
Neuronal Mimicry (Synaptic)	MROH1	7.21136e-14	0.961856	0.478	0.237	2.46773e-09
Neuronal Mimicry (Synaptic)	RBL2	0.00631862	0.961613	0.351	0.268	1
Neuronal Mimicry (Synaptic)	ATL1	2.37239e-10	0.961563	0.358	0.168	8.11831e-06
Neuronal Mimicry (Synaptic)	CLEC16A	1.81175e-05	0.957797	0.418	0.283	0.619982
Neuronal Mimicry (Synaptic)	SLC2A13	1.72561e-06	0.955614	0.403	0.26	0.0590505
Neuronal Mimicry (Synaptic)	GIT2	4.48878e-05	0.950143	0.321	0.194	1
Neuronal Mimicry (Synaptic)	PRRC2A	0.000177907	0.949923	0.388	0.267	1
Neuronal Mimicry (Synaptic)	OSGEP	0.0105927	0.945174	0.276	0.199	1
Neuronal Mimicry (Synaptic)	MPV17	0.170414	0.94514	0.261	0.234	1
Neuronal Mimicry (Synaptic)	SSBP3	0.00470513	0.943229	0.306	0.225	1
Neuronal Mimicry (Synaptic)	OSBPL6	3.97265e-14	0.943042	0.425	0.19	1.35944e-09
Neuronal Mimicry (Synaptic)	FASTKD1	0.00148529	0.942225	0.284	0.188	1
Neuronal Mimicry (Synaptic)	RHBDD2	0.614975	0.940518	0.269	0.271	1
Neuronal Mimicry (Synaptic)	ACAA1	0.133048	0.94003	0.276	0.242	1
Neuronal Mimicry (Synaptic)	PKIG	0.0214019	0.937424	0.284	0.217	1
Neuronal Mimicry (Synaptic)	EPHA6	7.21715e-92	0.935357	0.463	0.056	2.46971e-87
Neuronal Mimicry (Synaptic)	IQCE	0.0042192	0.935263	0.261	0.175	1
Neuronal Mimicry (Synaptic)	GTF2H1	0.0706496	0.931077	0.284	0.241	1
Neuronal Mimicry (Synaptic)	LRRC41	0.450578	0.924599	0.254	0.249	1
Neuronal Mimicry (Synaptic)	COQ4	0.0235104	0.920848	0.299	0.236	1
Neuronal Mimicry (Synaptic)	SLC25A46	0.0312373	0.920457	0.269	0.207	1
Neuronal Mimicry (Synaptic)	MAX	0.10664	0.916736	0.351	0.329	1
Neuronal Mimicry (Synaptic)	ZRANB1	1.82942e-05	0.915481	0.276	0.153	0.626028
Neuronal Mimicry (Synaptic)	APPL2	0.00227439	0.914568	0.358	0.259	1
Neuronal Mimicry (Synaptic)	CSAD	0.00365317	0.91343	0.306	0.221	1
Neuronal Mimicry (Synaptic)	CRMP1	4.902e-07	0.913092	0.366	0.195	0.0167746
Neuronal Mimicry (Synaptic)	BTBD10	0.0123967	0.910186	0.299	0.225	1
Neuronal Mimicry (Synaptic)	AARSD1	0.000523421	0.90986	0.269	0.165	1
Neuronal Mimicry (Synaptic)	FKTN	0.00312202	0.909844	0.276	0.182	1
Neuronal Mimicry (Synaptic)	ATP6V0D1	0.352506	0.908235	0.269	0.263	1
Neuronal Mimicry (Synaptic)	XYLB	2.49349e-05	0.908067	0.254	0.132	0.853272
Neuronal Mimicry (Synaptic)	CCDC88A	3.08402e-09	0.907389	0.575	0.382	0.000105535
Neuronal Mimicry (Synaptic)	PIGL	2.49233e-05	0.907384	0.351	0.213	0.852874
Neuronal Mimicry (Synaptic)	CNTRL	0.000924597	0.904907	0.284	0.186	1
Neuronal Mimicry (Synaptic)	CNDP2	0.470582	0.904905	0.209	0.263	1
Neuronal Mimicry (Synaptic)	ALMS1	0.000584674	0.903272	0.343	0.241	1
Neuronal Mimicry (Synaptic)	GOPC	0.259806	0.901315	0.313	0.307	1
Neuronal Mimicry (Synaptic)	TNRC6C	6.58589e-14	0.896032	0.56	0.316	2.25369e-09
Neuronal Mimicry (Synaptic)	SH3BP5	1.24456e-09	0.895735	0.373	0.191	4.25888e-05
Neuronal Mimicry (Synaptic)	UQCC1	0.00131954	0.887459	0.351	0.255	1
Neuronal Mimicry (Synaptic)	IVD	0.0462343	0.886343	0.254	0.199	1
Neuronal Mimicry (Synaptic)	TBC1D19	1.02149e-05	0.885251	0.351	0.208	0.349556
Neuronal Mimicry (Synaptic)	BCL2L13	0.0793546	0.882394	0.313	0.271	1
Neuronal Mimicry (Synaptic)	PRKAA2	4.79926e-09	0.882158	0.299	0.129	0.000164231
Neuronal Mimicry (Synaptic)	CRTC1	0.00112393	0.880865	0.284	0.183	1
Neuronal Mimicry (Synaptic)	SACS	0.00785365	0.88018	0.269	0.181	1
Neuronal Mimicry (Synaptic)	ATP6AP1	0.763075	0.879966	0.261	0.284	1
Neuronal Mimicry (Synaptic)	ZNF821	0.00113879	0.878176	0.254	0.157	1
Neuronal Mimicry (Synaptic)	GPI	0.0065784	0.876693	0.463	0.402	1
Neuronal Mimicry (Synaptic)	ME2	0.000648016	0.873736	0.313	0.2	1
Neuronal Mimicry (Synaptic)	ANKFY1	2.29947e-06	0.872498	0.425	0.262	0.078688
Neuronal Mimicry (Synaptic)	NHLRC2	0.019321	0.871488	0.284	0.211	1
Neuronal Mimicry (Synaptic)	IMMT	0.852855	0.86968	0.299	0.34	1
Neuronal Mimicry (Synaptic)	CEP290	0.0098709	0.869379	0.328	0.244	1
Neuronal Mimicry (Synaptic)	SETDB1	0.0296652	0.868922	0.299	0.237	1
Neuronal Mimicry (Synaptic)	PUS7L	0.00289795	0.868745	0.299	0.206	1
Neuronal Mimicry (Synaptic)	NDUFS1	0.0044484	0.868493	0.433	0.347	1
Neuronal Mimicry (Synaptic)	RNASEH2B	0.100443	0.867922	0.291	0.241	1
Neuronal Mimicry (Synaptic)	TMEM62	0.00249831	0.8675	0.254	0.164	1
Neuronal Mimicry (Synaptic)	ATG4B	0.266405	0.867468	0.276	0.258	1
Neuronal Mimicry (Synaptic)	SFXN5	7.85613e-08	0.866698	0.336	0.172	0.00268837
Neuronal Mimicry (Synaptic)	TET3	0.000803591	0.863178	0.351	0.25	1
Neuronal Mimicry (Synaptic)	ZDHHC17	0.00921194	0.861392	0.351	0.272	1
Neuronal Mimicry (Synaptic)	NBR1	0.205922	0.860932	0.261	0.231	1
Neuronal Mimicry (Synaptic)	RNF187	0.355008	0.860601	0.209	0.279	1
Neuronal Mimicry (Synaptic)	MSL1	0.0448523	0.85966	0.261	0.201	1
Neuronal Mimicry (Synaptic)	MTMR1	0.000834459	0.857913	0.299	0.198	1
Neuronal Mimicry (Synaptic)	PTPN11	0.0341985	0.856304	0.366	0.32	1
Neuronal Mimicry (Synaptic)	GNPTG	0.0190752	0.852219	0.299	0.234	1
Neuronal Mimicry (Synaptic)	WDR59	0.000664567	0.850375	0.373	0.27	1
Neuronal Mimicry (Synaptic)	HEXB	0.0752955	0.847916	0.291	0.236	1
Neuronal Mimicry (Synaptic)	CWF19L2	0.0169841	0.837754	0.299	0.234	1
Neuronal Mimicry (Synaptic)	HMGXB3	0.288821	0.834538	0.291	0.267	1
Neuronal Mimicry (Synaptic)	ATXN3	0.0256707	0.834242	0.291	0.228	1
Neuronal Mimicry (Synaptic)	WDR11	0.0236161	0.831663	0.299	0.234	1
Neuronal Mimicry (Synaptic)	INTU	0.000338512	0.830606	0.276	0.165	1
Neuronal Mimicry (Synaptic)	SPTAN1	4.43457e-31	0.829752	0.754	0.411	1.51751e-26
Neuronal Mimicry (Synaptic)	REEP5	0.159236	0.829455	0.44	0.423	1
Neuronal Mimicry (Synaptic)	KIAA0319	1.11447e-43	0.825599	0.321	0.049	3.81371e-39
Neuronal Mimicry (Synaptic)	EPS15L1	0.0347756	0.823538	0.306	0.246	1
Neuronal Mimicry (Synaptic)	HMG20A	0.0691126	0.823343	0.269	0.224	1
Neuronal Mimicry (Synaptic)	ORC3	0.0223397	0.823052	0.284	0.218	1
Neuronal Mimicry (Synaptic)	CRYZL1	0.117312	0.821141	0.306	0.248	1
Neuronal Mimicry (Synaptic)	PI4KB	0.0294564	0.818136	0.306	0.244	1
Neuronal Mimicry (Synaptic)	SUPT6H	0.278841	0.816527	0.291	0.264	1
Neuronal Mimicry (Synaptic)	UBA3	0.503088	0.816188	0.254	0.252	1
Neuronal Mimicry (Synaptic)	HACL1	0.00854751	0.814089	0.254	0.175	1
Neuronal Mimicry (Synaptic)	FBXO42	0.0141822	0.811252	0.336	0.258	1
Neuronal Mimicry (Synaptic)	TBRG1	0.0462577	0.810893	0.313	0.26	1
Neuronal Mimicry (Synaptic)	SPPL2B	0.0191456	0.80472	0.276	0.21	1
Neuronal Mimicry (Synaptic)	PARG	0.0951581	0.803679	0.269	0.221	1
Neuronal Mimicry (Synaptic)	HDAC3	0.0429174	0.802985	0.276	0.218	1
Neuronal Mimicry (Synaptic)	RAP1A	0.961709	0.80116	0.291	0.326	1
Neuronal Mimicry (Synaptic)	PPIL4	0.468743	0.796163	0.269	0.268	1
Neuronal Mimicry (Synaptic)	ANXA7	0.364192	0.795659	0.306	0.29	1
Neuronal Mimicry (Synaptic)	LCMT1	0.344686	0.795516	0.261	0.247	1
Neuronal Mimicry (Synaptic)	SCAMP1	0.956486	0.791874	0.239	0.254	1
Neuronal Mimicry (Synaptic)	BASP1	6.42725e-06	0.791617	0.388	0.223	0.219941
Neuronal Mimicry (Synaptic)	PPIL2	0.00172796	0.79142	0.276	0.182	1
Neuronal Mimicry (Synaptic)	BTBD7	0.0713571	0.79021	0.373	0.312	1
Neuronal Mimicry (Synaptic)	NPRL3	0.155368	0.789429	0.254	0.219	1
Neuronal Mimicry (Synaptic)	SYMPK	0.0304285	0.787114	0.299	0.24	1
Neuronal Mimicry (Synaptic)	PEX1	0.00792223	0.786705	0.284	0.204	1
Neuronal Mimicry (Synaptic)	USP37	0.00220662	0.786083	0.306	0.214	1
Neuronal Mimicry (Synaptic)	ABHD18	0.0212471	0.780057	0.276	0.21	1
Neuronal Mimicry (Synaptic)	CYB5R3	0.454574	0.77813	0.269	0.267	1
Neuronal Mimicry (Synaptic)	FBXW2	0.345245	0.777889	0.261	0.241	1
Neuronal Mimicry (Synaptic)	ZNF586	0.0346561	0.777536	0.261	0.201	1
Neuronal Mimicry (Synaptic)	WDR20	0.0433959	0.777282	0.313	0.255	1
Neuronal Mimicry (Synaptic)	TTYH3	0.000291666	0.776122	0.321	0.205	1
Neuronal Mimicry (Synaptic)	RIPK1	0.0188843	0.775885	0.269	0.2	1
Neuronal Mimicry (Synaptic)	RNPC3	5.64634e-09	0.775694	0.463	0.281	0.000193218
Neuronal Mimicry (Synaptic)	INTS3	0.0792242	0.773681	0.276	0.233	1
Neuronal Mimicry (Synaptic)	TMEM14A	0.234372	0.771162	0.269	0.235	1
Neuronal Mimicry (Synaptic)	LRPAP1	0.620794	0.769618	0.351	0.372	1
Neuronal Mimicry (Synaptic)	FBXO21	0.0249359	0.768503	0.358	0.304	1
Neuronal Mimicry (Synaptic)	NUDCD3	0.248435	0.766871	0.358	0.346	1
Neuronal Mimicry (Synaptic)	USP33	0.00137401	0.766804	0.455	0.368	1
Neuronal Mimicry (Synaptic)	PTPN18	0.00896425	0.765651	0.254	0.18	1
Neuronal Mimicry (Synaptic)	DDRGK1	0.478572	0.765043	0.306	0.305	1
Neuronal Mimicry (Synaptic)	RNF111	0.0137488	0.764244	0.373	0.303	1
Neuronal Mimicry (Synaptic)	ELP2	0.00236461	0.76323	0.396	0.3	1
Neuronal Mimicry (Synaptic)	ZNF251	0.0168713	0.76145	0.261	0.19	1
Neuronal Mimicry (Synaptic)	ANAPC4	0.0217505	0.758997	0.254	0.185	1
Neuronal Mimicry (Synaptic)	MYH10	8.15656e-05	0.758197	0.425	0.316	1
Neuronal Mimicry (Synaptic)	DYNC1I2	0.0132255	0.758137	0.47	0.415	1
Neuronal Mimicry (Synaptic)	NUMA1	0.0768108	0.756991	0.373	0.334	1
Neuronal Mimicry (Synaptic)	VPS39	0.0115703	0.755319	0.261	0.18	1
Neuronal Mimicry (Synaptic)	CTTNBP2	1.23226e-05	0.753463	0.299	0.16	0.42168
Neuronal Mimicry (Synaptic)	RPRD1B	0.344808	0.752223	0.261	0.241	1
Neuronal Mimicry (Synaptic)	PCNX4	0.0806342	0.75187	0.366	0.326	1
Neuronal Mimicry (Synaptic)	EP300	0.000954335	0.751665	0.425	0.327	1
Neuronal Mimicry (Synaptic)	KPNA6	0.263678	0.743751	0.306	0.285	1
Neuronal Mimicry (Synaptic)	TTC14	0.00290636	0.743516	0.41	0.325	1
Neuronal Mimicry (Synaptic)	DAB1	2.66421e-57	0.742677	0.597	0.153	9.11693e-53
Neuronal Mimicry (Synaptic)	CDK12	0.374355	0.741931	0.366	0.352	1
Neuronal Mimicry (Synaptic)	UBE4B	0.00900543	0.741854	0.403	0.319	1
Neuronal Mimicry (Synaptic)	GNL1	0.0952663	0.741099	0.291	0.242	1
Neuronal Mimicry (Synaptic)	NUCB1	0.518157	0.734308	0.269	0.312	1
Neuronal Mimicry (Synaptic)	FBXO22	0.032652	0.731987	0.313	0.248	1
Neuronal Mimicry (Synaptic)	PITPNA	0.512661	0.730195	0.254	0.241	1
Neuronal Mimicry (Synaptic)	FRA10AC1	0.0570261	0.72976	0.276	0.221	1
Neuronal Mimicry (Synaptic)	FAR1	0.00264458	0.729647	0.373	0.288	1
Neuronal Mimicry (Synaptic)	SLF1	0.0030392	0.725988	0.261	0.173	1
Neuronal Mimicry (Synaptic)	PIKFYVE	0.0109916	0.72296	0.336	0.258	1
Neuronal Mimicry (Synaptic)	MECP2	0.0581823	0.722156	0.366	0.329	1
Neuronal Mimicry (Synaptic)	PRPF8	0.044665	0.719212	0.366	0.306	1
Neuronal Mimicry (Synaptic)	MTERF4	0.0426314	0.719098	0.269	0.212	1
Neuronal Mimicry (Synaptic)	TTC21B	1.11699e-05	0.717641	0.381	0.242	0.382233
Neuronal Mimicry (Synaptic)	SLC30A9	0.387809	0.717556	0.343	0.339	1
Neuronal Mimicry (Synaptic)	ABI2	0.0100668	0.715113	0.485	0.423	1
Neuronal Mimicry (Synaptic)	MAP2K1	0.315915	0.711598	0.261	0.241	1
Neuronal Mimicry (Synaptic)	CNST	6.82966e-06	0.710456	0.403	0.257	0.233711
Neuronal Mimicry (Synaptic)	RHOT1	0.0543693	0.708595	0.351	0.292	1
Neuronal Mimicry (Synaptic)	SMARCB1	0.108153	0.704382	0.336	0.31	1
Neuronal Mimicry (Synaptic)	KLHL42	0.143208	0.703168	0.261	0.225	1
Neuronal Mimicry (Synaptic)	VPS35L	0.00452837	0.701497	0.373	0.282	1
Neuronal Mimicry (Synaptic)	UIMC1	0.139524	0.700298	0.306	0.278	1
Neuronal Mimicry (Synaptic)	RC3H2	0.116062	0.698202	0.306	0.269	1
Neuronal Mimicry (Synaptic)	API5	0.601255	0.69729	0.254	0.262	1
Neuronal Mimicry (Synaptic)	INO80	0.00561643	0.696053	0.366	0.281	1
Neuronal Mimicry (Synaptic)	RNF11	0.677245	0.695636	0.254	0.263	1
Neuronal Mimicry (Synaptic)	MPHOSPH8	0.0283955	0.694368	0.433	0.384	1
Neuronal Mimicry (Synaptic)	CHD8	0.110363	0.692507	0.336	0.3	1
Neuronal Mimicry (Synaptic)	BRD8	0.0136422	0.692274	0.299	0.221	1
Neuronal Mimicry (Synaptic)	TGOLN2	0.218108	0.689011	0.381	0.377	1
Neuronal Mimicry (Synaptic)	DNAJB14	0.00831712	0.688182	0.41	0.335	1
Neuronal Mimicry (Synaptic)	NDEL1	0.149325	0.687801	0.261	0.222	1
Neuronal Mimicry (Synaptic)	WDR82	0.949642	0.687386	0.231	0.255	1
Neuronal Mimicry (Synaptic)	KMT2A	0.00014349	0.687376	0.537	0.453	1
Neuronal Mimicry (Synaptic)	SRGAP2	0.223086	0.684031	0.254	0.222	1
Neuronal Mimicry (Synaptic)	OSBPL2	0.00681507	0.681584	0.284	0.207	1
Neuronal Mimicry (Synaptic)	ATG14	0.160895	0.681447	0.269	0.231	1
Neuronal Mimicry (Synaptic)	PWWP2A	0.95694	0.68031	0.224	0.251	1
Neuronal Mimicry (Synaptic)	NARF	0.0529426	0.679903	0.328	0.278	1
Neuronal Mimicry (Synaptic)	HBS1L	0.000872175	0.678144	0.351	0.255	1
Neuronal Mimicry (Synaptic)	GLMN	0.010148	0.678066	0.269	0.19	1
Neuronal Mimicry (Synaptic)	SLC35E3	0.0146893	0.675144	0.261	0.188	1
Neuronal Mimicry (Synaptic)	CD99L2	2.52881e-05	0.672179	0.351	0.21	0.865359
Neuronal Mimicry (Synaptic)	SCG5	1.04264e-05	0.672079	0.306	0.158	0.356792
Neuronal Mimicry (Synaptic)	CHM	0.952324	0.671988	0.284	0.301	1
Neuronal Mimicry (Synaptic)	RABEP1	0.00774298	0.670865	0.403	0.334	1
Neuronal Mimicry (Synaptic)	NDFIP1	0.0626554	0.669484	0.545	0.519	1
Neuronal Mimicry (Synaptic)	MGA	0.00019166	0.668515	0.433	0.309	1
Neuronal Mimicry (Synaptic)	NAE1	0.25559	0.668054	0.313	0.289	1
Neuronal Mimicry (Synaptic)	SAFB2	0.0236492	0.667332	0.366	0.307	1
Neuronal Mimicry (Synaptic)	ADD1	0.00177732	0.664991	0.47	0.386	1
Neuronal Mimicry (Synaptic)	UBE4A	0.0708269	0.659589	0.306	0.251	1
Neuronal Mimicry (Synaptic)	KDM3B	0.0889891	0.656319	0.336	0.281	1
Neuronal Mimicry (Synaptic)	SLC25A4	0.955215	0.655487	0.269	0.285	1
Neuronal Mimicry (Synaptic)	PPP6C	0.356554	0.651275	0.261	0.249	1
Neuronal Mimicry (Synaptic)	SPAST	0.0263671	0.651149	0.284	0.213	1
Neuronal Mimicry (Synaptic)	KDM4B	0.0160831	0.65033	0.351	0.283	1
Neuronal Mimicry (Synaptic)	MBTPS1	0.00977447	0.649817	0.396	0.321	1
Neuronal Mimicry (Synaptic)	NSL1	0.132269	0.64809	0.343	0.3	1
Neuronal Mimicry (Synaptic)	CPSF7	0.0654589	0.646807	0.336	0.285	1
Neuronal Mimicry (Synaptic)	INTS8	6.82112e-05	0.645537	0.381	0.256	1
Neuronal Mimicry (Synaptic)	MAP9	0.0235848	0.644022	0.254	0.177	1
Neuronal Mimicry (Synaptic)	MMP24OS	0.667379	0.643208	0.246	0.254	1
Neuronal Mimicry (Synaptic)	PCGF5	0.0412849	0.640566	0.299	0.239	1
Neuronal Mimicry (Synaptic)	ADARB1	8.98946e-07	0.637448	0.284	0.142	0.0307619
Neuronal Mimicry (Synaptic)	FASTKD2	0.0633766	0.634046	0.269	0.213	1
Neuronal Mimicry (Synaptic)	MTG1	0.0568936	0.629974	0.313	0.257	1
Neuronal Mimicry (Synaptic)	DEAF1	0.152717	0.62977	0.254	0.216	1
Neuronal Mimicry (Synaptic)	CNOT6L	0.000803168	0.629186	0.328	0.213	1
Neuronal Mimicry (Synaptic)	STK25	0.0689119	0.628667	0.306	0.248	1
Neuronal Mimicry (Synaptic)	EXT2	0.0167391	0.628372	0.306	0.234	1
Neuronal Mimicry (Synaptic)	NAA16	0.0389413	0.625906	0.306	0.246	1
Neuronal Mimicry (Synaptic)	CCDC57	0.0133911	0.625298	0.358	0.285	1
Neuronal Mimicry (Synaptic)	UBN2	0.00404063	0.623787	0.418	0.319	1
Neuronal Mimicry (Synaptic)	LRCH3	0.0375453	0.623389	0.41	0.35	1
Neuronal Mimicry (Synaptic)	SPECC1	0.000502181	0.619552	0.366	0.253	1
Neuronal Mimicry (Synaptic)	MICU2	0.0258039	0.618968	0.396	0.35	1
Neuronal Mimicry (Synaptic)	PHTF2	0.00444436	0.615336	0.388	0.294	1
Neuronal Mimicry (Synaptic)	BAZ2A	0.485055	0.614399	0.261	0.252	1
Neuronal Mimicry (Synaptic)	DDX24	0.105342	0.611528	0.478	0.429	1
Neuronal Mimicry (Synaptic)	RNF168	0.129734	0.601289	0.254	0.214	1
Neuronal Mimicry (Synaptic)	DGCR2	0.787124	0.600565	0.261	0.278	1
Neuronal Mimicry (Synaptic)	VPS36	0.688019	0.59872	0.299	0.304	1
Neuronal Mimicry (Synaptic)	AQR	0.0361106	0.597079	0.336	0.27	1
Neuronal Mimicry (Synaptic)	ERCC6L2	0.000655427	0.594983	0.418	0.319	1
Neuronal Mimicry (Synaptic)	PPP3CC	0.0152686	0.592462	0.313	0.232	1
Neuronal Mimicry (Synaptic)	ANKRD13C	0.281678	0.589585	0.284	0.266	1
Neuronal Mimicry (Synaptic)	TMEM245	0.000686105	0.588367	0.448	0.334	1
Neuronal Mimicry (Synaptic)	CERS5	0.100344	0.585621	0.269	0.224	1
Neuronal Mimicry (Synaptic)	GOSR2	0.275295	0.584697	0.261	0.233	1
Neuronal Mimicry (Synaptic)	TRAPPC11	0.0320249	0.58311	0.261	0.198	1
Neuronal Mimicry (Synaptic)	SUPT5H	0.886556	0.581085	0.284	0.309	1
Neuronal Mimicry (Synaptic)	SPG11	0.025855	0.580623	0.373	0.303	1
Neuronal Mimicry (Synaptic)	SUDS3	0.303692	0.579898	0.209	0.281	1
Neuronal Mimicry (Synaptic)	IREB2	0.205621	0.579748	0.299	0.268	1
Neuronal Mimicry (Synaptic)	AKAP12	2.37308e-09	0.577652	0.448	0.242	8.12067e-05
Neuronal Mimicry (Synaptic)	SLC38A6	0.0642701	0.576872	0.276	0.225	1
Neuronal Mimicry (Synaptic)	INO80D	0.167232	0.575912	0.313	0.273	1
Neuronal Mimicry (Synaptic)	PCF11	0.289371	0.574908	0.291	0.28	1
Neuronal Mimicry (Synaptic)	CCDC186	0.148053	0.573169	0.261	0.218	1
Neuronal Mimicry (Synaptic)	VPS50	0.0406366	0.571463	0.336	0.284	1
Neuronal Mimicry (Synaptic)	C2CD3	0.0487712	0.569436	0.254	0.194	1
Neuronal Mimicry (Synaptic)	GOLT1B	0.0885384	0.565876	0.261	0.214	1
Neuronal Mimicry (Synaptic)	CYB5R4	0.000412123	0.563769	0.269	0.161	1
Neuronal Mimicry (Synaptic)	PKD2	0.000143185	0.562377	0.418	0.289	1
Neuronal Mimicry (Synaptic)	PODXL2	0.0212761	0.562178	0.261	0.195	1
Neuronal Mimicry (Synaptic)	CFAP36	0.149328	0.560247	0.284	0.246	1
Neuronal Mimicry (Synaptic)	IRAK1BP1	2.77421e-05	0.560224	0.313	0.183	0.949333
Neuronal Mimicry (Synaptic)	ARAP2	0.0544503	0.559517	0.284	0.236	1
Neuronal Mimicry (Synaptic)	DNAJC5	0.199025	0.559493	0.284	0.256	1
Neuronal Mimicry (Synaptic)	FBXL20	0.00118816	0.558997	0.418	0.31	1
Neuronal Mimicry (Synaptic)	HAGH	0.177757	0.55848	0.306	0.273	1
Neuronal Mimicry (Synaptic)	MPRIP	1.49355e-08	0.557721	0.545	0.36	0.000511091
Neuronal Mimicry (Synaptic)	NSMAF	0.0432736	0.552707	0.299	0.235	1
Neuronal Mimicry (Synaptic)	SLC35F1	0.0622339	0.551845	0.261	0.201	1
Neuronal Mimicry (Synaptic)	NEK1	9.20757e-07	0.551355	0.433	0.272	0.0315083
Neuronal Mimicry (Synaptic)	LUZP1	0.185712	0.550377	0.269	0.231	1
Neuronal Mimicry (Synaptic)	RTF1	0.247065	0.549508	0.41	0.4	1
Neuronal Mimicry (Synaptic)	KANSL3	0.00564213	0.548428	0.276	0.198	1
Neuronal Mimicry (Synaptic)	GBF1	0.000406504	0.547367	0.425	0.315	1
Neuronal Mimicry (Synaptic)	USP14	0.0671511	0.547267	0.396	0.363	1
Neuronal Mimicry (Synaptic)	KIZ	0.177671	0.54664	0.313	0.273	1
Neuronal Mimicry (Synaptic)	ATG10	0.187804	0.537859	0.306	0.27	1
Neuronal Mimicry (Synaptic)	ATF6B	0.384453	0.534384	0.261	0.246	1
Neuronal Mimicry (Synaptic)	SDF4	0.629731	0.530233	0.291	0.309	1
Neuronal Mimicry (Synaptic)	TCF25	0.000286827	0.53013	0.612	0.53	1
Neuronal Mimicry (Synaptic)	GPR137C	2.29524e-10	0.529485	0.343	0.156	7.85432e-06
Neuronal Mimicry (Synaptic)	NCBP3	0.0326928	0.529366	0.299	0.239	1
Neuronal Mimicry (Synaptic)	TP53BP1	0.017336	0.527772	0.388	0.312	1
Neuronal Mimicry (Synaptic)	EXOC5	0.190201	0.527022	0.336	0.3	1
Neuronal Mimicry (Synaptic)	FLOT1	0.886588	0.52686	0.358	0.385	1
Neuronal Mimicry (Synaptic)	TCERG1	0.0101233	0.526413	0.448	0.402	1
Neuronal Mimicry (Synaptic)	PSMF1	0.368161	0.525831	0.336	0.336	1
Neuronal Mimicry (Synaptic)	NREP	4.98167e-10	0.524735	0.403	0.214	1.70473e-05
Neuronal Mimicry (Synaptic)	TMF1	0.954604	0.517712	0.261	0.28	1
Neuronal Mimicry (Synaptic)	PFN2	0.493071	0.515317	0.246	0.299	1
Neuronal Mimicry (Synaptic)	G3BP2	0.00913809	0.512421	0.403	0.349	1
Neuronal Mimicry (Synaptic)	ERCC1	0.915768	0.508759	0.246	0.267	1
Neuronal Mimicry (Synaptic)	KIF1B	2.48998e-10	0.508382	0.679	0.499	8.5207e-06
Neuronal Mimicry (Synaptic)	URGCP	0.0137298	0.508298	0.358	0.269	1
Neuronal Mimicry (Synaptic)	ZNF37A	0.172192	0.507891	0.291	0.259	1
Neuronal Mimicry (Synaptic)	SPOP	0.705688	0.495789	0.299	0.307	1
Neuronal Mimicry (Synaptic)	FBXW4	0.000348383	0.493475	0.336	0.231	1
Neuronal Mimicry (Synaptic)	AMMECR1	0.000430926	0.491553	0.269	0.162	1
Neuronal Mimicry (Synaptic)	TERF2IP	0.0340754	0.490332	0.493	0.417	1
Neuronal Mimicry (Synaptic)	CTNNAL1	0.0127216	0.486785	0.299	0.216	1
Neuronal Mimicry (Synaptic)	CCDC66	0.0385752	0.483829	0.373	0.307	1
Neuronal Mimicry (Synaptic)	STX7	0.890639	0.480716	0.254	0.273	1
Neuronal Mimicry (Synaptic)	TTC1	0.73634	0.480539	0.321	0.341	1
Neuronal Mimicry (Synaptic)	AKIRIN2	0.478547	0.477938	0.209	0.254	1
Neuronal Mimicry (Synaptic)	AGAP3	0.00376395	0.477285	0.299	0.212	1
Neuronal Mimicry (Synaptic)	PWP1	0.98875	0.475477	0.239	0.264	1
Neuronal Mimicry (Synaptic)	ILKAP	0.605312	0.473385	0.313	0.317	1
Neuronal Mimicry (Synaptic)	RAI1	0.00522931	0.472927	0.321	0.229	1
Neuronal Mimicry (Synaptic)	GPR107	0.229625	0.472871	0.276	0.245	1
Neuronal Mimicry (Synaptic)	PANK3	0.0373714	0.47286	0.284	0.23	1
Neuronal Mimicry (Synaptic)	MXI1	0.0766027	0.471253	0.373	0.315	1
Neuronal Mimicry (Synaptic)	APMAP	0.550114	0.470801	0.239	0.279	1
Neuronal Mimicry (Synaptic)	EYA3	0.284588	0.468872	0.291	0.263	1
Neuronal Mimicry (Synaptic)	ATXN2L	0.22175	0.46777	0.306	0.281	1
Neuronal Mimicry (Synaptic)	IQCB1	0.918991	0.46716	0.239	0.258	1
Neuronal Mimicry (Synaptic)	CREBRF	0.302405	0.466651	0.284	0.256	1
Neuronal Mimicry (Synaptic)	INTS10	0.0249382	0.464979	0.388	0.324	1
Neuronal Mimicry (Synaptic)	ALDH3A2	0.00783561	0.464597	0.321	0.23	1
Neuronal Mimicry (Synaptic)	ZC3H14	0.166989	0.460109	0.336	0.307	1
Neuronal Mimicry (Synaptic)	PLXNC1	5.14773e-05	0.458511	0.254	0.131	1
Neuronal Mimicry (Synaptic)	FUBP3	0.0406145	0.457742	0.351	0.288	1
Neuronal Mimicry (Synaptic)	SAFB	0.927938	0.456691	0.291	0.331	1
Neuronal Mimicry (Synaptic)	KIAA0586	0.000377708	0.455856	0.336	0.222	1
Neuronal Mimicry (Synaptic)	UQCRC1	0.607038	0.454511	0.254	0.296	1
Neuronal Mimicry (Synaptic)	RNF10	0.983523	0.451823	0.284	0.312	1
Neuronal Mimicry (Synaptic)	CAND1	0.218608	0.447911	0.403	0.374	1
Neuronal Mimicry (Synaptic)	NEO1	0.00632094	0.447702	0.299	0.224	1
Neuronal Mimicry (Synaptic)	NBN	0.146346	0.444289	0.306	0.267	1
Neuronal Mimicry (Synaptic)	GRIA3	1.90276e-12	0.443694	0.41	0.186	6.51125e-08
Neuronal Mimicry (Synaptic)	GIPC1	0.675557	0.443231	0.299	0.337	1
Neuronal Mimicry (Synaptic)	NMD3	0.00102396	0.443087	0.373	0.277	1
Neuronal Mimicry (Synaptic)	CCNC	0.772915	0.44305	0.254	0.282	1
Neuronal Mimicry (Synaptic)	MED23	0.00236426	0.44167	0.291	0.198	1
Neuronal Mimicry (Synaptic)	C6orf89	0.802868	0.44005	0.284	0.281	1
Neuronal Mimicry (Synaptic)	ARL1	0.0229119	0.439617	0.157	0.267	1
Neuronal Mimicry (Synaptic)	ATP6V0C	0.631072	0.438057	0.313	0.344	1
Neuronal Mimicry (Synaptic)	OGDH	0.711277	0.437931	0.299	0.303	1
Neuronal Mimicry (Synaptic)	ATAD1	0.62944	0.437735	0.299	0.293	1
Neuronal Mimicry (Synaptic)	TBC1D15	0.0472409	0.43713	0.343	0.288	1
Neuronal Mimicry (Synaptic)	SAE1	0.04941	0.436958	0.164	0.263	1
Neuronal Mimicry (Synaptic)	CADPS	1.11486e-60	0.436331	0.627	0.141	3.81506e-56
Neuronal Mimicry (Synaptic)	SPG7	0.00937339	0.435527	0.425	0.37	1
Neuronal Mimicry (Synaptic)	ADAM10	0.00205836	0.435431	0.47	0.383	1
Neuronal Mimicry (Synaptic)	CASD1	0.847016	0.43523	0.306	0.324	1
Neuronal Mimicry (Synaptic)	YIPF4	0.713596	0.432986	0.343	0.356	1
Neuronal Mimicry (Synaptic)	CDK5RAP3	0.00458327	0.424744	0.381	0.312	1
Neuronal Mimicry (Synaptic)	AFG3L2	0.827407	0.419639	0.269	0.276	1
Neuronal Mimicry (Synaptic)	ICE1	0.162895	0.412805	0.328	0.296	1
Neuronal Mimicry (Synaptic)	ATP6V1E1	0.242765	0.412623	0.224	0.294	1
Neuronal Mimicry (Synaptic)	FEZ1	0.145064	0.412247	0.276	0.221	1
Neuronal Mimicry (Synaptic)	ZNF544	0.739602	0.41044	0.254	0.265	1
Neuronal Mimicry (Synaptic)	NAPEPLD	0.261795	0.409366	0.269	0.23	1
Neuronal Mimicry (Synaptic)	FGFR1OP2	0.37318	0.408871	0.291	0.281	1
Neuronal Mimicry (Synaptic)	FEZ2	0.616347	0.408579	0.313	0.312	1
Neuronal Mimicry (Synaptic)	RAB28	0.994016	0.407925	0.276	0.315	1
Neuronal Mimicry (Synaptic)	CLIP2	0.0316143	0.406227	0.276	0.198	1
Neuronal Mimicry (Synaptic)	WWP2	0.865946	0.4061	0.239	0.254	1
Neuronal Mimicry (Synaptic)	CRK	0.408548	0.405381	0.224	0.282	1
Neuronal Mimicry (Synaptic)	CMC2	0.380603	0.404753	0.299	0.279	1
Neuronal Mimicry (Synaptic)	EP400	0.246353	0.404608	0.328	0.305	1
Neuronal Mimicry (Synaptic)	USP22	0.701812	0.403069	0.41	0.438	1
Neuronal Mimicry (Synaptic)	NMT1	0.390726	0.402234	0.246	0.304	1
Neuronal Mimicry (Synaptic)	KLHL22	0.0277125	0.401027	0.269	0.201	1
Neuronal Mimicry (Synaptic)	NDUFA10	0.000597964	0.400496	0.507	0.434	1
Neuronal Mimicry (Synaptic)	TUBGCP2	0.144828	0.399415	0.269	0.228	1
Neuronal Mimicry (Synaptic)	MARK2	0.00200214	0.398491	0.351	0.26	1
Neuronal Mimicry (Synaptic)	PRKAR1A	0.566881	0.397696	0.313	0.379	1
Neuronal Mimicry (Synaptic)	PMPCB	0.728517	0.397469	0.299	0.314	1
Neuronal Mimicry (Synaptic)	PPWD1	0.115559	0.396452	0.269	0.217	1
Neuronal Mimicry (Synaptic)	NUP58	0.092792	0.394372	0.358	0.32	1
Neuronal Mimicry (Synaptic)	TSPAN5	2.74455e-11	0.393195	0.478	0.267	9.39186e-07
Neuronal Mimicry (Synaptic)	SORT1	0.000352374	0.392643	0.425	0.318	1
Neuronal Mimicry (Synaptic)	TMTC1	9.51979e-17	0.391967	0.321	0.105	3.25767e-12
Neuronal Mimicry (Synaptic)	TAOK1	0.192473	0.391158	0.485	0.448	1
Neuronal Mimicry (Synaptic)	SYNRG	0.483837	0.387247	0.306	0.3	1
Neuronal Mimicry (Synaptic)	POLR2A	0.604079	0.384258	0.269	0.259	1
Neuronal Mimicry (Synaptic)	ST7L	0.215862	0.381535	0.261	0.224	1
Neuronal Mimicry (Synaptic)	MSH3	0.264776	0.381079	0.328	0.305	1
Neuronal Mimicry (Synaptic)	ZFYVE16	0.0817934	0.380211	0.433	0.387	1
Neuronal Mimicry (Synaptic)	MED27	0.503461	0.380141	0.306	0.3	1
Neuronal Mimicry (Synaptic)	DCUN1D1	0.995966	0.377051	0.239	0.25	1
Neuronal Mimicry (Synaptic)	AAMP	0.189832	0.374806	0.187	0.259	1
Neuronal Mimicry (Synaptic)	DDX1	0.89664	0.374282	0.291	0.305	1
Neuronal Mimicry (Synaptic)	PAFAH1B2	0.138391	0.373816	0.224	0.299	1
Neuronal Mimicry (Synaptic)	BEX4	0.580499	0.371072	0.269	0.254	1
Neuronal Mimicry (Synaptic)	NRF1	0.0707696	0.367854	0.358	0.308	1
Neuronal Mimicry (Synaptic)	PRXL2A	0.401413	0.361889	0.224	0.271	1
Neuronal Mimicry (Synaptic)	ILRUN	0.0314253	0.361007	0.306	0.242	1
Neuronal Mimicry (Synaptic)	SFSWAP	0.356163	0.360985	0.366	0.352	1
Neuronal Mimicry (Synaptic)	SBNO1	0.405773	0.359391	0.306	0.294	1
Neuronal Mimicry (Synaptic)	RAD9A	4.72127e-05	0.358533	0.336	0.214	1
Neuronal Mimicry (Synaptic)	DPP7	0.552571	0.358406	0.328	0.313	1
Neuronal Mimicry (Synaptic)	TBCD	0.000516358	0.358068	0.396	0.283	1
Neuronal Mimicry (Synaptic)	HERC3	9.77961e-21	0.352426	0.403	0.143	3.34658e-16
Neuronal Mimicry (Synaptic)	TRIM4	0.904555	0.351215	0.254	0.257	1
Neuronal Mimicry (Synaptic)	EIF2AK4	0.71138	0.34825	0.269	0.273	1
Neuronal Mimicry (Synaptic)	APC	2.6966e-05	0.34462	0.485	0.364	0.922778
Neuronal Mimicry (Synaptic)	FASTK	0.351367	0.343873	0.209	0.269	1
Neuronal Mimicry (Synaptic)	FOXK1	0.814585	0.339616	0.276	0.279	1
Neuronal Mimicry (Synaptic)	CYB5B	0.340195	0.338686	0.224	0.28	1
Neuronal Mimicry (Synaptic)	IFT43	0.324979	0.333614	0.224	0.274	1
Neuronal Mimicry (Synaptic)	PSMD13	0.491962	0.330113	0.261	0.304	1
Neuronal Mimicry (Synaptic)	UHMK1	0.06775	0.327661	0.231	0.325	1
Neuronal Mimicry (Synaptic)	SPART	0.217658	0.326478	0.306	0.266	1
Neuronal Mimicry (Synaptic)	ARMC9	0.0417543	0.325397	0.291	0.227	1
Neuronal Mimicry (Synaptic)	RALBP1	0.70622	0.325397	0.291	0.333	1
Neuronal Mimicry (Synaptic)	CDH2	0.00445249	0.325316	0.388	0.277	1
Neuronal Mimicry (Synaptic)	CLDND1	0.958899	0.324801	0.276	0.296	1
Neuronal Mimicry (Synaptic)	LNPEP	0.076316	0.324368	0.313	0.265	1
Neuronal Mimicry (Synaptic)	PRPF6	0.632184	0.324018	0.313	0.369	1
Neuronal Mimicry (Synaptic)	XPO7	0.976136	0.322852	0.254	0.261	1
Neuronal Mimicry (Synaptic)	ZCCHC17	0.315438	0.322599	0.336	0.312	1
Neuronal Mimicry (Synaptic)	NOP56	0.254376	0.318948	0.261	0.333	1
Neuronal Mimicry (Synaptic)	ADCY9	1.16428e-06	0.317782	0.336	0.181	0.0398416
Neuronal Mimicry (Synaptic)	COPG2	0.321977	0.317537	0.261	0.231	1
Neuronal Mimicry (Synaptic)	FAM50A	0.111589	0.316851	0.216	0.314	1
Neuronal Mimicry (Synaptic)	UBXN2B	0.0568719	0.312968	0.261	0.201	1
Neuronal Mimicry (Synaptic)	NUDT3	0.801042	0.312517	0.299	0.353	1
Neuronal Mimicry (Synaptic)	HSF1	0.22557	0.311742	0.201	0.273	1
Neuronal Mimicry (Synaptic)	ABL1	0.607978	0.311171	0.328	0.317	1
Neuronal Mimicry (Synaptic)	CERS4	0.0508876	0.31062	0.306	0.244	1
Neuronal Mimicry (Synaptic)	TNRC18	0.0172902	0.305317	0.44	0.371	1
Neuronal Mimicry (Synaptic)	ATF2	0.266919	0.305173	0.343	0.31	1
Neuronal Mimicry (Synaptic)	SHOC2	0.474213	0.302031	0.284	0.268	1
Neuronal Mimicry (Synaptic)	PACS2	5.00118e-07	0.298909	0.366	0.213	0.017114
Neuronal Mimicry (Synaptic)	CISD1	0.277809	0.298557	0.216	0.276	1
Neuronal Mimicry (Synaptic)	DENND6A	0.00788995	0.295303	0.284	0.196	1
Neuronal Mimicry (Synaptic)	RUBCN	3.19601e-05	0.293147	0.254	0.14	1
Neuronal Mimicry (Synaptic)	PSMG4	0.534943	0.292071	0.216	0.251	1
Neuronal Mimicry (Synaptic)	EIF4E	0.0911876	0.291287	0.261	0.354	1
Neuronal Mimicry (Synaptic)	NR2C2	0.99591	0.290723	0.239	0.253	1
Neuronal Mimicry (Synaptic)	ZXDC	0.886206	0.290521	0.246	0.263	1
Neuronal Mimicry (Synaptic)	ARNT	0.135111	0.290321	0.284	0.239	1
Neuronal Mimicry (Synaptic)	ZHX3	0.000567057	0.285318	0.41	0.301	1
Neuronal Mimicry (Synaptic)	SUSD4	1.39814e-15	0.284827	0.313	0.108	4.78442e-11
Neuronal Mimicry (Synaptic)	GTF2IRD1	0.433243	0.284502	0.284	0.262	1
Neuronal Mimicry (Synaptic)	STK4	0.732581	0.280015	0.246	0.271	1
Neuronal Mimicry (Synaptic)	C1orf52	0.702702	0.279211	0.254	0.257	1
Neuronal Mimicry (Synaptic)	NDUFS2	0.258181	0.278208	0.269	0.357	1
Neuronal Mimicry (Synaptic)	ZC3H6	0.442186	0.277991	0.261	0.245	1
Neuronal Mimicry (Synaptic)	NME7	0.252009	0.277471	0.321	0.29	1
Neuronal Mimicry (Synaptic)	EFCAB2	0.873498	0.272602	0.276	0.283	1
Neuronal Mimicry (Synaptic)	CENPC	0.034872	0.269392	0.328	0.268	1
Neuronal Mimicry (Synaptic)	ZNF84	0.40065	0.26585	0.276	0.248	1
Neuronal Mimicry (Synaptic)	DIS3L2	0.00433858	0.265354	0.425	0.335	1
Neuronal Mimicry (Synaptic)	TCEA2	0.969092	0.265205	0.246	0.258	1
Neuronal Mimicry (Synaptic)	SLC30A5	0.452599	0.263307	0.216	0.255	1
Neuronal Mimicry (Synaptic)	AGPAT3	0.644596	0.261751	0.276	0.266	1
Neuronal Mimicry (Synaptic)	ZMIZ1	0.0426982	0.252761	0.351	0.287	1
Neuronal Mimicry (Synaptic)	ZBTB18	2.14513e-08	0.252115	0.284	0.133	0.000734063
Neuronal Mimicry (Synaptic)	PHACTR2	1.3233e-07	0.252045	0.291	0.141	0.00452832
Neuronal Mimicry (Synaptic)	AATF	0.254179	0.250751	0.216	0.282	1
Squamous / Mucinous / Basal	PSCA	0	67.8125	0.5	0.027	0
Squamous / Mucinous / Basal	CEACAM5	3.96864e-143	20.7008	0.494	0.084	1.35807e-138
Squamous / Mucinous / Basal	SYNGR2	2.89741e-35	19.9453	0.466	0.215	9.91493e-31
Squamous / Mucinous / Basal	PTGR1	1.98305e-70	17.1407	0.555	0.217	6.786e-66
Squamous / Mucinous / Basal	AQP3	9.48378e-71	12.8131	0.38	0.093	3.24535e-66
Squamous / Mucinous / Basal	CEACAM6	3.55812e-92	12.1033	0.571	0.163	1.21759e-87
Squamous / Mucinous / Basal	CYP24A1	2.64467e-165	6.32324	0.276	0.02	9.05007e-161
Squamous / Mucinous / Basal	PKHD1	0	6.14934	0.393	0.016	0
Squamous / Mucinous / Basal	AKR1B10	0	5.69236	0.592	0.025	0
Squamous / Mucinous / Basal	NTS	0	5.68235	0.684	0.012	0
Squamous / Mucinous / Basal	CDHR2	7.11389e-243	5.35567	0.255	0.01	2.43437e-238
Squamous / Mucinous / Basal	RSPO3	0	5.19048	0.359	0.011	0
Squamous / Mucinous / Basal	CYP4F3	6.87302e-291	5.10205	0.347	0.016	2.35195e-286
Squamous / Mucinous / Basal	CREG1	1.16306e-69	4.88152	0.469	0.15	3.97998e-65
Squamous / Mucinous / Basal	MFAP5	4.1637e-263	4.87505	0.267	0.01	1.42482e-258
Squamous / Mucinous / Basal	GPX2	1.11599e-175	4.735	0.38	0.04	3.81893e-171
Squamous / Mucinous / Basal	NPW	8.35526e-74	4.61892	0.319	0.066	2.85917e-69
Squamous / Mucinous / Basal	TRIM29	3.11969e-197	4.56349	0.39	0.037	1.06756e-192
Squamous / Mucinous / Basal	TINAG	1.89111e-282	4.54808	0.252	0.007	6.47139e-278
Squamous / Mucinous / Basal	IFI6	1.32954e-08	4.54433	0.156	0.309	0.000454968
Squamous / Mucinous / Basal	FZD4	1.21585e-122	4.41321	0.252	0.024	4.16065e-118
Squamous / Mucinous / Basal	LYPD3	6.56692e-142	4.29112	0.261	0.022	2.2472e-137
Squamous / Mucinous / Basal	PTGES	3.21827e-180	4.29094	0.39	0.041	1.10129e-175
Squamous / Mucinous / Basal	IGF2BP1	1.15642e-169	4.27886	0.252	0.016	3.95726e-165
Squamous / Mucinous / Basal	VEGFC	7.76116e-200	4.27385	0.307	0.02	2.65587e-195
Squamous / Mucinous / Basal	EIF4B	6.61784e-10	4.20779	0.555	0.48	2.26462e-05
Squamous / Mucinous / Basal	CYP2C18	0	4.16115	0.319	0.006	0
Squamous / Mucinous / Basal	ALS2CL	9.36559e-122	3.99007	0.362	0.053	3.20491e-117
Squamous / Mucinous / Basal	VARS2	1.17296e-71	3.90204	0.325	0.07	4.01387e-67
Squamous / Mucinous / Basal	TSKU	3.45017e-101	3.90101	0.353	0.06	1.18065e-96
Squamous / Mucinous / Basal	GPX3	9.12016e-110	3.86033	0.463	0.098	3.12092e-105
Squamous / Mucinous / Basal	APOL1	1.26879e-93	3.85124	0.291	0.044	4.34181e-89
Squamous / Mucinous / Basal	SRXN1	2.1676e-136	3.83662	0.301	0.031	7.41751e-132
Squamous / Mucinous / Basal	GCNT3	2.28389e-160	3.7148	0.396	0.047	7.81548e-156
Squamous / Mucinous / Basal	CYP4F11	1.93964e-169	3.65046	0.276	0.02	6.63745e-165
Squamous / Mucinous / Basal	CLDN7	2.69122e-86	3.64817	0.607	0.204	9.20936e-82
Squamous / Mucinous / Basal	GALNT4	3.82551e-164	3.64475	0.429	0.055	1.30909e-159
Squamous / Mucinous / Basal	AMN	2.69034e-101	3.6418	0.301	0.043	9.20635e-97
Squamous / Mucinous / Basal	RHOF	3.3461e-106	3.60322	0.417	0.08	1.14503e-101
Squamous / Mucinous / Basal	DCDC2	1.31338e-87	3.59162	0.276	0.041	4.49438e-83
Squamous / Mucinous / Basal	KIAA0319	0	3.55264	0.571	0.035	0
Squamous / Mucinous / Basal	MSLN	2.88949e-208	3.54933	0.58	0.085	9.88784e-204
Squamous / Mucinous / Basal	TIMP2	0.136516	3.42496	0.258	0.319	1
Squamous / Mucinous / Basal	RORC	1.92041e-64	3.41944	0.261	0.049	6.57164e-60
Squamous / Mucinous / Basal	LGSN	2.81064e-124	3.37824	0.276	0.028	9.618e-120
Squamous / Mucinous / Basal	SDCBP2	8.9576e-93	3.35694	0.374	0.073	3.06529e-88
Squamous / Mucinous / Basal	INAVA	3.98282e-74	3.35207	0.328	0.068	1.36292e-69
Squamous / Mucinous / Basal	LAD1	1.5375e-93	3.30932	0.402	0.083	5.26133e-89
Squamous / Mucinous / Basal	JUP	6.35621e-119	3.2922	0.626	0.181	2.17509e-114
Squamous / Mucinous / Basal	DNAJC15	2.45726e-35	3.24988	0.537	0.312	8.40874e-31
Squamous / Mucinous / Basal	SLC16A5	2.62361e-62	3.19323	0.261	0.05	8.978e-58
Squamous / Mucinous / Basal	FA2H	2.84295e-70	3.14728	0.288	0.054	9.72856e-66
Squamous / Mucinous / Basal	C16orf74	1.51257e-50	3.09637	0.31	0.083	5.176e-46
Squamous / Mucinous / Basal	MARVELD1	4.36555e-62	3.08812	0.285	0.06	1.49389e-57
Squamous / Mucinous / Basal	MYH14	2.46904e-83	3.08191	0.552	0.181	8.44906e-79
Squamous / Mucinous / Basal	HKDC1	6.27372e-97	3.04667	0.328	0.052	2.14687e-92
Squamous / Mucinous / Basal	AVPI1	4.61067e-62	2.99183	0.307	0.069	1.57777e-57
Squamous / Mucinous / Basal	EPS8L1	1.45305e-62	2.95429	0.304	0.067	4.97233e-58
Squamous / Mucinous / Basal	EPHA2	3.6387e-56	2.95357	0.294	0.069	1.24516e-51
Squamous / Mucinous / Basal	MPP3	1.08557e-49	2.86692	0.276	0.068	3.71482e-45
Squamous / Mucinous / Basal	MUC5AC	2.42409e-300	2.86555	0.365	0.018	8.29522e-296
Squamous / Mucinous / Basal	TSPAN1	2.73311e-38	2.85809	0.261	0.073	9.3527e-34
Squamous / Mucinous / Basal	ARHGAP27	2.69291e-71	2.83309	0.344	0.076	9.21513e-67
Squamous / Mucinous / Basal	PECR	5.57069e-30	2.82027	0.255	0.084	1.90629e-25
Squamous / Mucinous / Basal	COL4A4	9.9313e-68	2.81789	0.264	0.047	3.39849e-63
Squamous / Mucinous / Basal	FURIN	8.60713e-48	2.81323	0.344	0.103	2.94536e-43
Squamous / Mucinous / Basal	PPP1R13L	7.76735e-41	2.74296	0.328	0.108	2.65799e-36
Squamous / Mucinous / Basal	PGD	2.20544e-69	2.70515	0.592	0.242	7.54701e-65
Squamous / Mucinous / Basal	MAPK13	9.47732e-38	2.69836	0.319	0.106	3.24314e-33
Squamous / Mucinous / Basal	PRSS22	7.40132e-40	2.68179	0.258	0.069	2.53273e-35
Squamous / Mucinous / Basal	RNASET2	2.53245e-117	2.67187	0.62	0.18	8.66604e-113
Squamous / Mucinous / Basal	RHOV	1.0468e-47	2.65167	0.27	0.066	3.58214e-43
Squamous / Mucinous / Basal	SEMA3B	1.50301e-35	2.64376	0.282	0.088	5.14329e-31
Squamous / Mucinous / Basal	IQANK1	8.22808e-57	2.63913	0.347	0.091	2.81565e-52
Squamous / Mucinous / Basal	SH2D3A	7.31249e-34	2.6208	0.258	0.079	2.50233e-29
Squamous / Mucinous / Basal	ALDH3B1	1.71596e-70	2.61775	0.307	0.061	5.87201e-66
Squamous / Mucinous / Basal	PER2	4.79359e-69	2.49245	0.472	0.148	1.64037e-64
Squamous / Mucinous / Basal	DOCK8	6.47764e-42	2.48923	0.264	0.069	2.21665e-37
Squamous / Mucinous / Basal	ITPR3	4.17032e-48	2.42391	0.436	0.161	1.42708e-43
Squamous / Mucinous / Basal	F11R	2.70625e-59	2.36884	0.534	0.206	9.2608e-55
Squamous / Mucinous / Basal	TMEM184A	2.49793e-37	2.36838	0.267	0.076	8.54791e-33
Squamous / Mucinous / Basal	TDP2	1.48255e-122	2.32985	0.595	0.158	5.07329e-118
Squamous / Mucinous / Basal	RDH13	1.22092e-20	2.31542	0.252	0.102	4.178e-16
Squamous / Mucinous / Basal	GSR	2.11775e-56	2.30467	0.491	0.181	7.24694e-52
Squamous / Mucinous / Basal	G6PD	3.2682e-16	2.30419	0.273	0.133	1.11838e-11
Squamous / Mucinous / Basal	UNC93B1	2.33607e-24	2.29342	0.279	0.109	7.99403e-20
Squamous / Mucinous / Basal	AFMID	2.22828e-18	2.27045	0.264	0.119	7.62518e-14
Squamous / Mucinous / Basal	UBALD2	1.17883e-24	2.27017	0.387	0.196	4.03396e-20
Squamous / Mucinous / Basal	LIPH	1.30262e-87	2.26724	0.365	0.071	4.45757e-83
Squamous / Mucinous / Basal	PTTG1IP	1.38549e-07	2.26362	0.577	0.495	0.00474115
Squamous / Mucinous / Basal	PPIC	1.57467e-14	2.19759	0.282	0.148	5.38851e-10
Squamous / Mucinous / Basal	SQOR	2.40861e-36	2.14431	0.304	0.099	8.24226e-32
Squamous / Mucinous / Basal	OVOL2	4.37974e-24	2.12676	0.304	0.127	1.49875e-19
Squamous / Mucinous / Basal	SLC8B1	3.92919e-29	2.12143	0.252	0.082	1.34457e-24
Squamous / Mucinous / Basal	NADK	1.59109e-26	2.11947	0.362	0.164	5.44469e-22
Squamous / Mucinous / Basal	TMBIM1	2.90368e-31	2.1129	0.368	0.154	9.93638e-27
Squamous / Mucinous / Basal	NAPRT	1.63989e-35	2.10144	0.383	0.152	5.6117e-31
Squamous / Mucinous / Basal	SLC2A1	2.55765e-31	2.0868	0.396	0.171	8.75229e-27
Squamous / Mucinous / Basal	NANS	2.24074e-06	2.07339	0.288	0.212	0.0766782
Squamous / Mucinous / Basal	OPN3	1.00579e-30	2.05919	0.347	0.139	3.44182e-26
Squamous / Mucinous / Basal	ZNF587B	1.06327e-19	2.05647	0.291	0.135	3.6385e-15
Squamous / Mucinous / Basal	PPARD	2.13614e-20	2.0559	0.356	0.184	7.30988e-16
Squamous / Mucinous / Basal	ACOT13	3.02778e-29	2.04644	0.423	0.206	1.03611e-24
Squamous / Mucinous / Basal	COMTD1	5.84586e-19	2.04603	0.285	0.131	2.00045e-14
Squamous / Mucinous / Basal	SIRT7	4.32405e-27	2.04139	0.39	0.185	1.47969e-22
Squamous / Mucinous / Basal	VAV2	7.18574e-31	2.03598	0.396	0.176	2.45896e-26
Squamous / Mucinous / Basal	ARRDC1	4.09731e-19	2.03324	0.316	0.154	1.4021e-14
Squamous / Mucinous / Basal	DESI1	1.92064e-24	2.02605	0.396	0.202	6.57242e-20
Squamous / Mucinous / Basal	MYO18A	2.35179e-36	2.0048	0.371	0.139	8.04781e-32
Squamous / Mucinous / Basal	MKNK1	2.02896e-16	1.98952	0.279	0.136	6.94311e-12
Squamous / Mucinous / Basal	SPINT1	3.7898e-34	1.96398	0.445	0.199	1.29687e-29
Squamous / Mucinous / Basal	OAS1	9.02971e-174	1.96258	0.564	0.097	3.08997e-169
Squamous / Mucinous / Basal	TRIM16	7.31872e-22	1.95814	0.325	0.151	2.50446e-17
Squamous / Mucinous / Basal	GALNT3	1.93713e-41	1.95419	0.411	0.154	6.62885e-37
Squamous / Mucinous / Basal	JPT2	2.46377e-26	1.95412	0.405	0.2	8.43102e-22
Squamous / Mucinous / Basal	NECTIN4	1.59343e-38	1.94749	0.255	0.07	5.45273e-34
Squamous / Mucinous / Basal	C2CD2	1.32079e-14	1.91771	0.27	0.135	4.51974e-10
Squamous / Mucinous / Basal	CPT1A	1.10931e-20	1.90792	0.264	0.106	3.79606e-16
Squamous / Mucinous / Basal	RASSF7	2.56214e-22	1.8983	0.313	0.138	8.76765e-18
Squamous / Mucinous / Basal	SDF2L1	1.29273e-11	1.89381	0.328	0.21	4.42372e-07
Squamous / Mucinous / Basal	SPATA6L	2.61785e-26	1.89002	0.273	0.098	8.95828e-22
Squamous / Mucinous / Basal	MPRIP	6.64608e-29	1.88453	0.552	0.356	2.27429e-24
Squamous / Mucinous / Basal	CHML	4.74949e-21	1.87151	0.294	0.13	1.62528e-16
Squamous / Mucinous / Basal	NDFIP2	2.31771e-14	1.84781	0.356	0.216	7.93119e-10
Squamous / Mucinous / Basal	IRAK1	5.04552e-11	1.84578	0.288	0.172	1.72658e-06
Squamous / Mucinous / Basal	CHP1	6.66215e-21	1.84172	0.414	0.23	2.27979e-16
Squamous / Mucinous / Basal	LLGL2	1.6056e-80	1.83727	0.561	0.189	5.49435e-76
Squamous / Mucinous / Basal	POC1B	1.31435e-20	1.83316	0.337	0.16	4.49772e-16
Squamous / Mucinous / Basal	DTX2	2.68021e-16	1.8041	0.27	0.13	9.17167e-12
Squamous / Mucinous / Basal	HTATIP2	2.82463e-12	1.80038	0.27	0.149	9.66589e-08
Squamous / Mucinous / Basal	SLC38A10	2.13013e-25	1.79564	0.451	0.241	7.28929e-21
Squamous / Mucinous / Basal	PPTC7	2.96477e-21	1.7937	0.34	0.164	1.01455e-16
Squamous / Mucinous / Basal	RFFL	3.26921e-24	1.79026	0.374	0.179	1.11872e-19
Squamous / Mucinous / Basal	BCAP31	2.84365e-24	1.77149	0.592	0.435	9.73098e-20
Squamous / Mucinous / Basal	NUP50-DT	7.49506e-14	1.76909	0.273	0.144	2.56481e-09
Squamous / Mucinous / Basal	TMC6	7.5509e-14	1.75288	0.279	0.146	2.58392e-09
Squamous / Mucinous / Basal	HPCAL1	1.17074e-38	1.7506	0.509	0.253	4.00626e-34
Squamous / Mucinous / Basal	PLPP2	5.31516e-20	1.74729	0.337	0.167	1.81885e-15
Squamous / Mucinous / Basal	TMEM120B	5.32902e-14	1.74624	0.31	0.168	1.82359e-09
Squamous / Mucinous / Basal	DHX34	1.98646e-13	1.7456	0.255	0.128	6.79765e-09
Squamous / Mucinous / Basal	PLEKHM1	8.72952e-20	1.74455	0.298	0.137	2.98724e-15
Squamous / Mucinous / Basal	POLD4	5.28047e-12	1.73402	0.301	0.176	1.80698e-07
Squamous / Mucinous / Basal	MYO1C	1.23745e-11	1.73039	0.301	0.175	4.23457e-07
Squamous / Mucinous / Basal	PNPLA2	1.18757e-18	1.72007	0.325	0.159	4.06385e-14
Squamous / Mucinous / Basal	LMTK2	5.11236e-26	1.71595	0.479	0.276	1.74945e-21
Squamous / Mucinous / Basal	TMC4	1.25713e-15	1.71031	0.304	0.156	4.30191e-11
Squamous / Mucinous / Basal	MINK1	4.27443e-18	1.69409	0.319	0.16	1.46271e-13
Squamous / Mucinous / Basal	KLHL2	2.27128e-16	1.69176	0.328	0.179	7.77234e-12
Squamous / Mucinous / Basal	SGPP1	1.02215e-16	1.68618	0.267	0.122	3.4978e-12
Squamous / Mucinous / Basal	CLUH	1.48015e-15	1.68392	0.252	0.116	5.06506e-11
Squamous / Mucinous / Basal	PRR13	2.44339e-13	1.67707	0.414	0.292	8.36127e-09
Squamous / Mucinous / Basal	CLYBL	1.83484e-22	1.6719	0.313	0.139	6.27881e-18
Squamous / Mucinous / Basal	AGTRAP	1.59918e-12	1.67109	0.301	0.171	5.4724e-08
Squamous / Mucinous / Basal	TNFRSF21	3.80021e-19	1.65341	0.383	0.205	1.30043e-14
Squamous / Mucinous / Basal	NQO2	9.53673e-13	1.65105	0.31	0.179	3.26347e-08
Squamous / Mucinous / Basal	ENTPD6	1.56599e-14	1.64638	0.319	0.178	5.35883e-10
Squamous / Mucinous / Basal	TP53I3	1.2003e-15	1.63496	0.298	0.151	4.10744e-11
Squamous / Mucinous / Basal	KIAA1522	8.0319e-31	1.62278	0.383	0.163	2.74852e-26
Squamous / Mucinous / Basal	ACOT7	7.55622e-09	1.6188	0.288	0.183	0.000258574
Squamous / Mucinous / Basal	FAM83A	1.54014e-73	1.61296	0.417	0.106	5.27036e-69
Squamous / Mucinous / Basal	TARID	2.098e-146	1.60651	0.276	0.024	7.17934e-142
Squamous / Mucinous / Basal	HECW2	2.12671e-24	1.60564	0.285	0.111	7.27761e-20
Squamous / Mucinous / Basal	MPST	3.31811e-10	1.59641	0.328	0.216	1.13546e-05
Squamous / Mucinous / Basal	THEM4	4.37735e-13	1.59443	0.322	0.189	1.49793e-08
Squamous / Mucinous / Basal	GRN	1.25151e-09	1.59335	0.414	0.309	4.28267e-05
Squamous / Mucinous / Basal	ERGIC1	3.52977e-51	1.59081	0.62	0.346	1.20789e-46
Squamous / Mucinous / Basal	TSR1	2.66772e-08	1.58896	0.255	0.158	0.000912894
Squamous / Mucinous / Basal	CYB561	7.98354e-09	1.58725	0.258	0.155	0.000273197
Squamous / Mucinous / Basal	TNIP1	1.80081e-11	1.5843	0.307	0.183	6.16239e-07
Squamous / Mucinous / Basal	FLII	3.57283e-13	1.58205	0.27	0.14	1.22262e-08
Squamous / Mucinous / Basal	SERINC2	1.83349e-22	1.57957	0.337	0.154	6.27419e-18
Squamous / Mucinous / Basal	LRRC59	1.83789e-12	1.57924	0.359	0.223	6.28928e-08
Squamous / Mucinous / Basal	SHC1	2.44095e-11	1.57098	0.301	0.178	8.35294e-07
Squamous / Mucinous / Basal	GNAI1	1.5941e-16	1.56914	0.362	0.206	5.45501e-12
Squamous / Mucinous / Basal	RBCK1	6.23932e-16	1.56099	0.439	0.292	2.1351e-11
Squamous / Mucinous / Basal	TXNDC5	2.00978e-23	1.55707	0.347	0.161	6.87748e-19
Squamous / Mucinous / Basal	CCDC57	3.3253e-18	1.55258	0.448	0.28	1.13792e-13
Squamous / Mucinous / Basal	CGN	1.59701e-79	1.54201	0.436	0.11	5.46498e-75
Squamous / Mucinous / Basal	ATIC	3.98636e-12	1.53527	0.405	0.272	1.36413e-07
Squamous / Mucinous / Basal	BRD9	2.10362e-08	1.52446	0.356	0.254	0.00071986
Squamous / Mucinous / Basal	NAB1	3.11176e-05	1.52318	0.255	0.186	1
Squamous / Mucinous / Basal	NCSTN	8.1551e-12	1.51408	0.334	0.205	2.79068e-07
Squamous / Mucinous / Basal	CORO2A	5.39557e-26	1.51306	0.264	0.092	1.84636e-21
Squamous / Mucinous / Basal	KLHDC4	2.19963e-08	1.51034	0.282	0.184	0.000752713
Squamous / Mucinous / Basal	LRP10	4.11558e-06	1.50359	0.279	0.202	0.140835
Squamous / Mucinous / Basal	VASP	4.51678e-14	1.49786	0.307	0.166	1.54564e-09
Squamous / Mucinous / Basal	GALE	5.74383e-12	1.4873	0.291	0.165	1.96554e-07
Squamous / Mucinous / Basal	ETFB	4.76222e-07	1.48243	0.39	0.321	0.0162963
Squamous / Mucinous / Basal	IL6R	1.39502e-16	1.48218	0.304	0.151	4.77377e-12
Squamous / Mucinous / Basal	GCN1	1.11979e-13	1.48189	0.328	0.186	3.8319e-09
Squamous / Mucinous / Basal	MRS2	2.58491e-08	1.47219	0.294	0.196	0.000884558
Squamous / Mucinous / Basal	DNAJC16	2.36869e-06	1.45086	0.252	0.169	0.0810565
Squamous / Mucinous / Basal	NDEL1	2.37293e-06	1.45032	0.298	0.22	0.0812017
Squamous / Mucinous / Basal	VSIG10	4.1769e-11	1.43793	0.264	0.144	1.42934e-06
Squamous / Mucinous / Basal	ZNF678	3.69779e-06	1.4376	0.255	0.177	0.126538
Squamous / Mucinous / Basal	SLC16A3	3.7293e-55	1.43151	0.503	0.188	1.27617e-50
Squamous / Mucinous / Basal	KIF1A	2.32587e-22	1.42439	0.307	0.134	7.95913e-18
Squamous / Mucinous / Basal	MGST2	2.2496e-08	1.41838	0.276	0.174	0.000769813
Squamous / Mucinous / Basal	HGS	2.79166e-11	1.40083	0.356	0.228	9.55306e-07
Squamous / Mucinous / Basal	SMG5	1.8434e-15	1.39783	0.374	0.221	6.30813e-11
Squamous / Mucinous / Basal	TYMP	2.16726e-15	1.39405	0.35	0.199	7.41635e-11
Squamous / Mucinous / Basal	ALDH3A2	6.1082e-21	1.3918	0.414	0.225	2.09022e-16
Squamous / Mucinous / Basal	GSTK1	1.0263e-06	1.38729	0.417	0.347	0.0351198
Squamous / Mucinous / Basal	PDZD8	2.63457e-07	1.38712	0.322	0.227	0.00901549
Squamous / Mucinous / Basal	FOSL2	2.57165e-53	1.38013	0.451	0.162	8.80019e-49
Squamous / Mucinous / Basal	GOSR2	2.62521e-11	1.37571	0.356	0.229	8.98346e-07
Squamous / Mucinous / Basal	CTDSP1	1.29353e-06	1.37504	0.252	0.165	0.0442646
Squamous / Mucinous / Basal	CALCOCO2	2.95144e-09	1.37418	0.34	0.229	0.000100998
Squamous / Mucinous / Basal	MRPL38	5.2984e-08	1.37179	0.285	0.182	0.00181311
Squamous / Mucinous / Basal	ATP5MC1	2.16855e-05	1.36178	0.414	0.355	0.742077
Squamous / Mucinous / Basal	POLG2	1.96221e-09	1.36169	0.264	0.157	6.71467e-05
Squamous / Mucinous / Basal	NSF	1.24747e-09	1.3605	0.337	0.221	4.26883e-05
Squamous / Mucinous / Basal	ING5	2.1435e-06	1.34702	0.298	0.22	0.0733505
Squamous / Mucinous / Basal	SLC50A1	1.0707e-08	1.34383	0.279	0.174	0.000366395
Squamous / Mucinous / Basal	FKBP4	0.000143264	1.34348	0.273	0.213	1
Squamous / Mucinous / Basal	DHX32	1.0138e-08	1.33458	0.322	0.217	0.000346924
Squamous / Mucinous / Basal	EGLN1	2.71339e-08	1.3285	0.399	0.305	0.00092852
Squamous / Mucinous / Basal	COX10	1.16908e-09	1.32038	0.276	0.165	4.0006e-05
Squamous / Mucinous / Basal	ZNF875	0.000117052	1.31875	0.285	0.224	1
Squamous / Mucinous / Basal	USP36	9.51473e-09	1.31507	0.325	0.215	0.000325594
Squamous / Mucinous / Basal	ECI1	0.000255099	1.31405	0.325	0.275	1
Squamous / Mucinous / Basal	NAA10	0.129347	1.31086	0.301	0.309	1
Squamous / Mucinous / Basal	GNPTG	2.26353e-09	1.30702	0.34	0.232	7.74579e-05
Squamous / Mucinous / Basal	MRPS27	1.30718e-05	1.3067	0.304	0.233	0.447316
Squamous / Mucinous / Basal	SUPT6H	1.97427e-12	1.30467	0.396	0.26	6.75596e-08
Squamous / Mucinous / Basal	INF2	6.48193e-18	1.30145	0.304	0.149	2.21812e-13
Squamous / Mucinous / Basal	MCM3AP	2.86512e-08	1.29913	0.334	0.229	0.000980445
Squamous / Mucinous / Basal	SLC39A7	7.36845e-10	1.29811	0.38	0.264	2.52148e-05
Squamous / Mucinous / Basal	SPINT2	9.44108e-44	1.29745	0.632	0.31	3.23074e-39
Squamous / Mucinous / Basal	MLX	1.41391e-06	1.29439	0.285	0.194	0.0483841
Squamous / Mucinous / Basal	PCGF5	1.58119e-09	1.28475	0.35	0.236	5.41084e-05
Squamous / Mucinous / Basal	SCAMP2	6.08434e-06	1.27843	0.291	0.21	0.208206
Squamous / Mucinous / Basal	ASL	1.24592e-07	1.27447	0.301	0.2	0.00426355
Squamous / Mucinous / Basal	ZYX	4.35235e-05	1.27218	0.264	0.196	1
Squamous / Mucinous / Basal	DUS1L	5.52219e-10	1.27122	0.31	0.195	1.88969e-05
Squamous / Mucinous / Basal	DNAAF5	9.22451e-07	1.27082	0.267	0.18	0.0315663
Squamous / Mucinous / Basal	ALG8	8.72783e-06	1.27	0.298	0.222	0.298666
Squamous / Mucinous / Basal	SETDB1	3.55605e-10	1.26797	0.356	0.234	1.21688e-05
Squamous / Mucinous / Basal	PTPN11	7.84291e-09	1.25991	0.42	0.317	0.000268384
Squamous / Mucinous / Basal	IARS2	2.19464e-05	1.25976	0.356	0.288	0.751007
Squamous / Mucinous / Basal	IGSF8	3.83034e-08	1.25933	0.264	0.162	0.00131074
Squamous / Mucinous / Basal	PPIL2	5.26492e-05	1.25201	0.252	0.181	1
Squamous / Mucinous / Basal	HDLBP	1.13854e-38	1.23912	0.693	0.489	3.89609e-34
Squamous / Mucinous / Basal	UHMK1	9.52773e-12	1.23804	0.442	0.32	3.26039e-07
Squamous / Mucinous / Basal	IL10RB	2.94607e-05	1.21975	0.252	0.175	1
Squamous / Mucinous / Basal	STXBP4	2.86161e-08	1.21111	0.304	0.195	0.000979244
Squamous / Mucinous / Basal	SSR1	9.63079e-12	1.19806	0.491	0.364	3.29565e-07
Squamous / Mucinous / Basal	RINT1	2.79279e-05	1.19734	0.252	0.179	0.955693
Squamous / Mucinous / Basal	MRPS18A	0.000900891	1.19358	0.252	0.195	1
Squamous / Mucinous / Basal	OSTF1	2.68348e-06	1.1873	0.258	0.174	0.0918286
Squamous / Mucinous / Basal	PYCR1	2.4402e-05	1.18627	0.276	0.198	0.835036
Squamous / Mucinous / Basal	ANAPC7	8.18751e-08	1.18301	0.334	0.236	0.00280176
Squamous / Mucinous / Basal	IL18	2.33533e-45	1.17787	0.27	0.069	7.99149e-41
Squamous / Mucinous / Basal	CTCF	0.000544123	1.1755	0.304	0.247	1
Squamous / Mucinous / Basal	ASPSCR1	0.00023935	1.16192	0.273	0.211	1
Squamous / Mucinous / Basal	TOR1AIP2	3.43888e-08	1.16082	0.469	0.378	0.00117678
Squamous / Mucinous / Basal	CASP8	1.77923e-09	1.15987	0.258	0.146	6.08851e-05
Squamous / Mucinous / Basal	ZMPSTE24	0.0019794	1.15487	0.264	0.218	1
Squamous / Mucinous / Basal	MAPKAPK5	7.07679e-05	1.15456	0.279	0.21	1
Squamous / Mucinous / Basal	PLEKHA1	6.46713e-07	1.15386	0.301	0.208	0.0221305
Squamous / Mucinous / Basal	AAGAB	3.9693e-07	1.14891	0.291	0.203	0.0135829
Squamous / Mucinous / Basal	COX14	0.855097	1.14828	0.239	0.27	1
Squamous / Mucinous / Basal	ADPGK	0.000152873	1.14283	0.261	0.196	1
Squamous / Mucinous / Basal	EPN1	0.00726791	1.13764	0.282	0.248	1
Squamous / Mucinous / Basal	SLC30A7	0.000757218	1.12766	0.301	0.251	1
Squamous / Mucinous / Basal	SETD7	2.02363e-05	1.12405	0.27	0.192	0.692487
Squamous / Mucinous / Basal	ELK4	0.000263134	1.12399	0.252	0.193	1
Squamous / Mucinous / Basal	WDR75	4.11257e-06	1.12039	0.298	0.214	0.140732
Squamous / Mucinous / Basal	TPD52L2	1.61611e-06	1.11936	0.35	0.265	0.0553033
Squamous / Mucinous / Basal	RNPEP	0.000860912	1.11208	0.258	0.203	1
Squamous / Mucinous / Basal	LAGE3	0.143629	1.11084	0.285	0.282	1
Squamous / Mucinous / Basal	FAT1	2.5498e-63	1.10766	0.598	0.26	8.72543e-59
Squamous / Mucinous / Basal	SERINC3	0.000178169	1.10701	0.377	0.323	1
Squamous / Mucinous / Basal	BDH1	2.8514e-09	1.1018	0.258	0.15	9.75748e-05
Squamous / Mucinous / Basal	SLC25A39	1.87603e-05	1.09746	0.353	0.278	0.641976
Squamous / Mucinous / Basal	IDH1	6.27666e-07	1.0959	0.374	0.278	0.0214787
Squamous / Mucinous / Basal	RPRD1B	8.04478e-06	1.09259	0.316	0.239	0.275292
Squamous / Mucinous / Basal	LSM12	0.00725901	1.08835	0.288	0.244	1
Squamous / Mucinous / Basal	NCBP3	0.000917168	1.08616	0.291	0.238	1
Squamous / Mucinous / Basal	TRAP1	1.42329e-05	1.08584	0.368	0.301	0.48705
Squamous / Mucinous / Basal	KLF3	1.01219e-18	1.08554	0.439	0.274	3.46373e-14
Squamous / Mucinous / Basal	SRPRA	6.67086e-06	1.08181	0.298	0.214	0.228277
Squamous / Mucinous / Basal	TRAPPC12	2.67298e-06	1.08072	0.383	0.306	0.0914695
Squamous / Mucinous / Basal	MGAT4B	0.000194638	1.07817	0.252	0.184	1
Squamous / Mucinous / Basal	RIT1	2.8192e-05	1.06648	0.267	0.19	0.96473
Squamous / Mucinous / Basal	TRIM27	3.34734e-06	1.06051	0.344	0.261	0.114546
Squamous / Mucinous / Basal	NFE2L1	0.0199357	1.05636	0.252	0.215	1
Squamous / Mucinous / Basal	AUP1	8.85257e-07	1.05567	0.436	0.362	0.0302935
Squamous / Mucinous / Basal	MYO19	1.91238e-09	1.05476	0.319	0.202	6.54415e-05
Squamous / Mucinous / Basal	CASP4	8.81041e-11	1.05064	0.285	0.16	3.01492e-06
Squamous / Mucinous / Basal	PSME2	0.000926743	1.0466	0.356	0.318	1
Squamous / Mucinous / Basal	TTC13	1.86851e-05	1.0461	0.255	0.181	0.639405
Squamous / Mucinous / Basal	GNS	0.00130937	1.04313	0.273	0.217	1
Squamous / Mucinous / Basal	SEC16A	0.00361324	1.03915	0.252	0.202	1
Squamous / Mucinous / Basal	U2AF2	0.00423834	1.03534	0.252	0.208	1
Squamous / Mucinous / Basal	AGPS	0.00067237	1.03463	0.328	0.28	1
Squamous / Mucinous / Basal	PPP5C	0.000227266	1.03434	0.27	0.21	1
Squamous / Mucinous / Basal	SYMPK	0.000236278	1.03389	0.298	0.239	1
Squamous / Mucinous / Basal	EFTUD2	0.000626993	1.02998	0.276	0.218	1
Squamous / Mucinous / Basal	EXOSC8	0.0538881	1.02993	0.267	0.245	1
Squamous / Mucinous / Basal	CDK5RAP3	3.51293e-21	1.02955	0.482	0.307	1.20212e-16
Squamous / Mucinous / Basal	MCFD2	0.000264929	1.02355	0.331	0.265	1
Squamous / Mucinous / Basal	EIPR1	0.0006312	1.02351	0.273	0.212	1
Squamous / Mucinous / Basal	ATP5PD	0.00260272	1.01946	0.353	0.319	1
Squamous / Mucinous / Basal	BAIAP2	1.85542e-05	1.0181	0.31	0.235	0.634924
Squamous / Mucinous / Basal	DNPH1	0.0177946	1.01715	0.325	0.292	1
Squamous / Mucinous / Basal	RTL8A	0.874263	1.00596	0.218	0.253	1
Squamous / Mucinous / Basal	KIAA0232	1.45909e-11	1.00536	0.485	0.38	4.99301e-07
Squamous / Mucinous / Basal	DNAJC5	1.21667e-05	1.00509	0.331	0.254	0.416345
Squamous / Mucinous / Basal	AATF	0.00599387	1.00483	0.313	0.281	1
Squamous / Mucinous / Basal	SNHG25	7.86722e-05	1.00437	0.264	0.191	1
Squamous / Mucinous / Basal	TSPAN14	0.000129349	1.00418	0.301	0.235	1
Squamous / Mucinous / Basal	SH3D21	6.78913e-26	1.00341	0.261	0.094	2.32324e-21
Squamous / Mucinous / Basal	MAPK1IP1L	2.6217e-05	1.00273	0.42	0.376	0.897144
Squamous / Mucinous / Basal	MFSD11	0.00475827	1.00086	0.255	0.211	1
Squamous / Mucinous / Basal	SNRPD3	0.626641	1.00066	0.288	0.35	1
Squamous / Mucinous / Basal	ATP6AP1	0.015734	1.00035	0.31	0.283	1
Squamous / Mucinous / Basal	CAMK2G	3.29919e-05	0.993919	0.255	0.179	1
Squamous / Mucinous / Basal	MAP2K1	0.00451948	0.990829	0.279	0.24	1
Squamous / Mucinous / Basal	GTF2IRD1	5.55465e-05	0.988188	0.328	0.26	1
Squamous / Mucinous / Basal	INTS1	8.31086e-05	0.987723	0.252	0.178	1
Squamous / Mucinous / Basal	WDR59	0.00128793	0.987405	0.319	0.27	1
Squamous / Mucinous / Basal	LETMD1	0.000263084	0.98185	0.288	0.224	1
Squamous / Mucinous / Basal	ST14	3.29104e-15	0.981639	0.298	0.153	1.12619e-10
Squamous / Mucinous / Basal	PRKCSH	0.00674454	0.980181	0.319	0.282	1
Squamous / Mucinous / Basal	GSTO1	0.109118	0.977494	0.273	0.261	1
Squamous / Mucinous / Basal	UTP6	0.000178172	0.976995	0.285	0.218	1
Squamous / Mucinous / Basal	CS	4.92756e-06	0.972662	0.313	0.225	0.168621
Squamous / Mucinous / Basal	TGOLN2	0.000119406	0.969082	0.417	0.376	1
Squamous / Mucinous / Basal	EIF4G1	0.000103487	0.967552	0.426	0.377	1
Squamous / Mucinous / Basal	MRRF	0.000103377	0.965954	0.285	0.215	1
Squamous / Mucinous / Basal	ZNF544	1.03158e-05	0.962736	0.337	0.263	0.353006
Squamous / Mucinous / Basal	NPRL3	0.00626049	0.962159	0.267	0.218	1
Squamous / Mucinous / Basal	BAG6	0.00110561	0.957989	0.294	0.237	1
Squamous / Mucinous / Basal	DDX52	0.00386347	0.945424	0.273	0.223	1
Squamous / Mucinous / Basal	TGIF1	5.08099e-06	0.944714	0.319	0.235	0.173872
Squamous / Mucinous / Basal	SLC39A9	0.000371891	0.943004	0.285	0.222	1
Squamous / Mucinous / Basal	PSMD12	2.63157e-05	0.941612	0.417	0.354	0.900523
Squamous / Mucinous / Basal	DDX42	4.50445e-06	0.941594	0.426	0.352	0.154142
Squamous / Mucinous / Basal	BLOC1S1	0.662368	0.941271	0.276	0.34	1
Squamous / Mucinous / Basal	EMC10	0.00718602	0.930841	0.334	0.304	1
Squamous / Mucinous / Basal	RPE	0.0139331	0.929443	0.252	0.219	1
Squamous / Mucinous / Basal	BCL2L1	2.06451e-25	0.926678	0.497	0.297	7.06476e-21
Squamous / Mucinous / Basal	PMEPA1	1.15966e-17	0.919606	0.377	0.211	3.96835e-13
Squamous / Mucinous / Basal	SREK1	0.000273227	0.918351	0.454	0.429	1
Squamous / Mucinous / Basal	HEATR1	1.19291e-10	0.918104	0.371	0.256	4.08215e-06
Squamous / Mucinous / Basal	COPG1	0.00859995	0.917552	0.276	0.239	1
Squamous / Mucinous / Basal	ARF3	0.08042	0.917259	0.304	0.294	1
Squamous / Mucinous / Basal	BAZ2A	0.00014844	0.916712	0.316	0.25	1
Squamous / Mucinous / Basal	RIPK1	0.000378989	0.915053	0.264	0.199	1
Squamous / Mucinous / Basal	GNA13	0.00173875	0.912424	0.261	0.208	1
Squamous / Mucinous / Basal	NIPA2	0.011713	0.911947	0.273	0.232	1
Squamous / Mucinous / Basal	GORASP2	6.34566e-06	0.911639	0.399	0.321	0.217148
Squamous / Mucinous / Basal	HERPUD2	0.0247276	0.908158	0.255	0.227	1
Squamous / Mucinous / Basal	KAT7	0.0023495	0.907102	0.255	0.203	1
Squamous / Mucinous / Basal	PEX14	0.0141952	0.905674	0.261	0.226	1
Squamous / Mucinous / Basal	DAG1	1.943e-09	0.902389	0.356	0.244	6.64893e-05
Squamous / Mucinous / Basal	OCLN	1.88471e-09	0.901914	0.282	0.169	6.44947e-05
Squamous / Mucinous / Basal	CCDC47	0.000537524	0.898448	0.451	0.412	1
Squamous / Mucinous / Basal	HMG20B	0.177012	0.897265	0.267	0.253	1
Squamous / Mucinous / Basal	INO80D	1.6197e-06	0.894435	0.362	0.271	0.055426
Squamous / Mucinous / Basal	SCAMP3	0.00301374	0.894094	0.288	0.237	1
Squamous / Mucinous / Basal	UGGT1	9.79497e-05	0.893997	0.325	0.255	1
Squamous / Mucinous / Basal	UBE2V1	0.000296825	0.893512	0.374	0.318	1
Squamous / Mucinous / Basal	GNPAT	0.0209265	0.891448	0.282	0.25	1
Squamous / Mucinous / Basal	SREK1IP1	0.00890355	0.890155	0.276	0.239	1
Squamous / Mucinous / Basal	CHTOP	0.0184691	0.886918	0.356	0.34	1
Squamous / Mucinous / Basal	OSBPL2	1.02991e-05	0.881645	0.285	0.205	0.352436
Squamous / Mucinous / Basal	FEM1B	0.00385447	0.881147	0.252	0.2	1
Squamous / Mucinous / Basal	MAVS	1.75695e-06	0.879492	0.285	0.199	0.060123
Squamous / Mucinous / Basal	SHARPIN	0.267164	0.875701	0.267	0.26	1
Squamous / Mucinous / Basal	TNFRSF1A	0.000228957	0.869947	0.328	0.253	1
Squamous / Mucinous / Basal	DNAJC11	0.000269661	0.867449	0.252	0.186	1
Squamous / Mucinous / Basal	WAPL	1.40897e-05	0.865941	0.368	0.296	0.482149
Squamous / Mucinous / Basal	ANAPC1	0.000632911	0.865866	0.276	0.218	1
Squamous / Mucinous / Basal	NSUN2	6.32584e-08	0.864331	0.331	0.228	0.0021647
Squamous / Mucinous / Basal	UCHL5	0.000841952	0.861458	0.331	0.277	1
Squamous / Mucinous / Basal	SEC23B	0.0105883	0.854502	0.261	0.218	1
Squamous / Mucinous / Basal	PRPF8	0.000665016	0.852201	0.359	0.305	1
Squamous / Mucinous / Basal	IST1	0.00207909	0.851818	0.371	0.328	1
Squamous / Mucinous / Basal	MVP	0.00887989	0.851159	0.252	0.205	1
Squamous / Mucinous / Basal	DHCR24	0.00196357	0.849431	0.276	0.225	1
Squamous / Mucinous / Basal	BLZF1	0.00322801	0.849038	0.276	0.229	1
Squamous / Mucinous / Basal	ERBB3	0.000109717	0.847253	0.347	0.273	1
Squamous / Mucinous / Basal	ORC2	0.02028	0.846465	0.288	0.256	1
Squamous / Mucinous / Basal	MRPL22	0.507359	0.844717	0.221	0.262	1
Squamous / Mucinous / Basal	AGPAT3	0.015989	0.844131	0.298	0.265	1
Squamous / Mucinous / Basal	FAM136A	0.0227059	0.840754	0.304	0.273	1
Squamous / Mucinous / Basal	TMEM43	0.0047824	0.837487	0.264	0.219	1
Squamous / Mucinous / Basal	PLPP5	0.0807158	0.836119	0.252	0.231	1
Squamous / Mucinous / Basal	TRIM26	2.17969e-07	0.83596	0.304	0.207	0.00745889
Squamous / Mucinous / Basal	CYFIP1	0.00113982	0.834851	0.34	0.288	1
Squamous / Mucinous / Basal	PNKD	0.0467871	0.83411	0.344	0.338	1
Squamous / Mucinous / Basal	USP7	0.425155	0.833975	0.261	0.262	1
Squamous / Mucinous / Basal	OS9	1.55596e-08	0.828086	0.445	0.336	0.00053245
Squamous / Mucinous / Basal	TET3	0.000104484	0.825242	0.322	0.249	1
Squamous / Mucinous / Basal	TUBGCP2	0.00024163	0.823068	0.294	0.227	1
Squamous / Mucinous / Basal	STX18	0.025965	0.819875	0.279	0.247	1
Squamous / Mucinous / Basal	MRPL27	0.236846	0.816597	0.276	0.266	1
Squamous / Mucinous / Basal	OGDH	0.0362428	0.814552	0.316	0.303	1
Squamous / Mucinous / Basal	TMEM33	0.00825985	0.812884	0.319	0.28	1
Squamous / Mucinous / Basal	EFCAB14	0.0058209	0.810731	0.313	0.274	1
Squamous / Mucinous / Basal	TMEM208	0.468963	0.808121	0.264	0.317	1
Squamous / Mucinous / Basal	YIPF3	0.124475	0.804166	0.337	0.33	1
Squamous / Mucinous / Basal	SLC39A1	0.235359	0.802039	0.279	0.274	1
Squamous / Mucinous / Basal	MRPS35	0.0437293	0.799018	0.291	0.273	1
Squamous / Mucinous / Basal	LASP1	0.0034946	0.798853	0.255	0.203	1
Squamous / Mucinous / Basal	ARHGDIA	0.330274	0.798378	0.322	0.341	1
Squamous / Mucinous / Basal	SDHC	9.48755e-08	0.796759	0.482	0.397	0.00324664
Squamous / Mucinous / Basal	ATP6V0C	0.00465783	0.796314	0.374	0.342	1
Squamous / Mucinous / Basal	NUDCD3	0.00461191	0.795981	0.368	0.345	1
Squamous / Mucinous / Basal	MCCC2	0.00327156	0.790985	0.279	0.228	1
Squamous / Mucinous / Basal	SURF4	0.0903345	0.785167	0.344	0.342	1
Squamous / Mucinous / Basal	TMED3	4.88184e-08	0.784214	0.405	0.308	0.00167056
Squamous / Mucinous / Basal	LIMD1	0.000157675	0.78347	0.279	0.21	1
Squamous / Mucinous / Basal	DAZAP2	0.0049254	0.775767	0.377	0.342	1
Squamous / Mucinous / Basal	NSFL1C	0.0268528	0.773359	0.31	0.28	1
Squamous / Mucinous / Basal	ABCC1	3.05373e-33	0.773237	0.439	0.203	1.04499e-28
Squamous / Mucinous / Basal	CSNK1D	0.0376767	0.773152	0.353	0.34	1
Squamous / Mucinous / Basal	UBE2Z	0.0346803	0.772842	0.264	0.235	1
Squamous / Mucinous / Basal	TDG	0.0143036	0.770964	0.294	0.254	1
Squamous / Mucinous / Basal	CHM	0.106119	0.76863	0.31	0.3	1
Squamous / Mucinous / Basal	STK4	0.000224581	0.765224	0.34	0.268	1
Squamous / Mucinous / Basal	CNOT1	3.76388e-07	0.76434	0.423	0.341	0.01288
Squamous / Mucinous / Basal	HEXA	0.00288476	0.764129	0.347	0.302	1
Squamous / Mucinous / Basal	USP22	0.000289854	0.758329	0.466	0.437	1
Squamous / Mucinous / Basal	NAXE	0.0544368	0.752667	0.282	0.257	1
Squamous / Mucinous / Basal	DDRGK1	0.673548	0.752389	0.285	0.306	1
Squamous / Mucinous / Basal	ARL1	0.513424	0.751997	0.261	0.266	1
Squamous / Mucinous / Basal	GGNBP2	0.000478059	0.748881	0.439	0.39	1
Squamous / Mucinous / Basal	NT5C	0.0801732	0.746095	0.304	0.285	1
Squamous / Mucinous / Basal	EIF4E2	0.0949016	0.744201	0.298	0.287	1
Squamous / Mucinous / Basal	IPO7	0.00521369	0.734289	0.399	0.368	1
Squamous / Mucinous / Basal	UFD1	0.0836733	0.720142	0.264	0.243	1
Squamous / Mucinous / Basal	ATP5F1B	1.78751e-05	0.720117	0.515	0.452	0.611685
Squamous / Mucinous / Basal	LARP4	0.00222236	0.718448	0.387	0.344	1
Squamous / Mucinous / Basal	ATAD1	0.0480296	0.71839	0.313	0.292	1
Squamous / Mucinous / Basal	IREB2	0.0134947	0.718302	0.301	0.267	1
Squamous / Mucinous / Basal	CAPNS1	0.194365	0.708639	0.276	0.267	1
Squamous / Mucinous / Basal	RNF149	1.2751e-14	0.707891	0.454	0.31	4.36339e-10
Squamous / Mucinous / Basal	PRCC	0.0130645	0.707068	0.307	0.273	1
Squamous / Mucinous / Basal	MRPL41	0.231148	0.703088	0.285	0.296	1
Squamous / Mucinous / Basal	NTPCR	0.371652	0.700859	0.267	0.264	1
Squamous / Mucinous / Basal	BNIP2	0.0738859	0.699773	0.267	0.246	1
Squamous / Mucinous / Basal	TMED7	0.0447234	0.696612	0.279	0.247	1
Squamous / Mucinous / Basal	EXOC7	0.319103	0.696412	0.255	0.254	1
Squamous / Mucinous / Basal	UTP18	0.0226801	0.696311	0.267	0.232	1
Squamous / Mucinous / Basal	ZBTB1	0.0155819	0.695898	0.285	0.248	1
Squamous / Mucinous / Basal	M6PR	0.0397898	0.6954	0.291	0.264	1
Squamous / Mucinous / Basal	SLC25A16	1.64383e-05	0.694011	0.307	0.23	0.562518
Squamous / Mucinous / Basal	SUDS3	0.02731	0.693908	0.31	0.279	1
Squamous / Mucinous / Basal	PRRC2A	0.375154	0.690819	0.264	0.269	1
Squamous / Mucinous / Basal	NUTF2	0.0829151	0.684946	0.307	0.291	1
Squamous / Mucinous / Basal	INO80	0.0150134	0.684322	0.31	0.281	1
Squamous / Mucinous / Basal	KPNB1	0.00449707	0.680829	0.482	0.499	1
Squamous / Mucinous / Basal	MAPK6	0.189108	0.679321	0.301	0.296	1
Squamous / Mucinous / Basal	USP40	0.00172956	0.677757	0.316	0.265	1
Squamous / Mucinous / Basal	TSNAX	0.163792	0.675828	0.316	0.31	1
Squamous / Mucinous / Basal	OTUD4	0.0376283	0.673888	0.264	0.233	1
Squamous / Mucinous / Basal	EIF3D	0.127236	0.672506	0.362	0.355	1
Squamous / Mucinous / Basal	METTL16	0.170488	0.668781	0.285	0.273	1
Squamous / Mucinous / Basal	MRPL12	0.545176	0.668118	0.224	0.263	1
Squamous / Mucinous / Basal	ACO2	0.743716	0.667476	0.291	0.314	1
Squamous / Mucinous / Basal	MRPS5	0.212423	0.664296	0.377	0.38	1
Squamous / Mucinous / Basal	SPCS3	0.00573154	0.663891	0.362	0.31	1
Squamous / Mucinous / Basal	EP400	0.0428175	0.657553	0.328	0.304	1
Squamous / Mucinous / Basal	IPO5	0.0354536	0.657485	0.31	0.282	1
Squamous / Mucinous / Basal	SF3B3	0.200301	0.656642	0.31	0.304	1
Squamous / Mucinous / Basal	SHLD2	2.32816e-05	0.652519	0.301	0.221	0.796696
Squamous / Mucinous / Basal	VPS37B	0.00422439	0.652293	0.319	0.276	1
Squamous / Mucinous / Basal	EIF3B	0.000244156	0.650558	0.451	0.408	1
Squamous / Mucinous / Basal	CDK12	0.0487474	0.646686	0.362	0.351	1
Squamous / Mucinous / Basal	ATXN7L3B	0.389068	0.646346	0.282	0.287	1
Squamous / Mucinous / Basal	PPP2R1A	0.11953	0.645621	0.377	0.374	1
Squamous / Mucinous / Basal	TSG101	0.46639	0.64376	0.285	0.338	1
Squamous / Mucinous / Basal	TSTD1	0.000101423	0.641307	0.294	0.218	1
Squamous / Mucinous / Basal	PABPC4	0.113251	0.641108	0.31	0.302	1
Squamous / Mucinous / Basal	ZXDC	0.000474773	0.640434	0.319	0.261	1
Squamous / Mucinous / Basal	SPG7	8.37932e-08	0.640067	0.445	0.369	0.0028674
Squamous / Mucinous / Basal	NDUFA9	0.896662	0.639979	0.267	0.284	1
Squamous / Mucinous / Basal	UQCRC1	0.0145503	0.638694	0.334	0.295	1
Squamous / Mucinous / Basal	ILRUN	1.80115e-07	0.638663	0.344	0.24	0.00616352
Squamous / Mucinous / Basal	DGCR2	0.00198069	0.637651	0.325	0.276	1
Squamous / Mucinous / Basal	EIF3J	0.139379	0.635523	0.344	0.339	1
Squamous / Mucinous / Basal	GLRX3	0.195023	0.635488	0.304	0.302	1
Squamous / Mucinous / Basal	PSMD4	0.00490892	0.635441	0.451	0.431	1
Squamous / Mucinous / Basal	UBE2F	0.230159	0.635281	0.27	0.257	1
Squamous / Mucinous / Basal	ATF7	0.0660029	0.63519	0.344	0.33	1
Squamous / Mucinous / Basal	PSMF1	0.25026	0.632503	0.331	0.336	1
Squamous / Mucinous / Basal	SERPINB6	0.0208091	0.632204	0.344	0.308	1
Squamous / Mucinous / Basal	NDUFAF2	0.105606	0.626129	0.328	0.32	1
Squamous / Mucinous / Basal	MESD	0.272123	0.625314	0.298	0.291	1
Squamous / Mucinous / Basal	CASC3	0.0143495	0.624664	0.27	0.232	1
Squamous / Mucinous / Basal	KHDC4	3.08897e-05	0.62257	0.365	0.297	1
Squamous / Mucinous / Basal	TRIM56	0.00694441	0.622365	0.288	0.24	1
Squamous / Mucinous / Basal	CLASRP	0.168351	0.621722	0.258	0.241	1
Squamous / Mucinous / Basal	PUS7	0.00349299	0.621246	0.258	0.21	1
Squamous / Mucinous / Basal	PSMC5	0.410132	0.620048	0.328	0.349	1
Squamous / Mucinous / Basal	SPG11	0.000443041	0.611632	0.371	0.302	1
Squamous / Mucinous / Basal	DNAJC2	0.461884	0.607144	0.331	0.353	1
Squamous / Mucinous / Basal	COPB1	0.102051	0.606777	0.356	0.349	1
Squamous / Mucinous / Basal	GSAP	1.41882e-27	0.606303	0.411	0.197	4.85521e-23
Squamous / Mucinous / Basal	RNF216	0.0290147	0.605899	0.399	0.395	1
Squamous / Mucinous / Basal	GPI	0.160246	0.604847	0.396	0.403	1
Squamous / Mucinous / Basal	TMEM248	0.386451	0.60232	0.313	0.319	1
Squamous / Mucinous / Basal	CMC1	0.194788	0.601209	0.31	0.307	1
Squamous / Mucinous / Basal	IGFBP4	1.33572e-28	0.598687	0.319	0.12	4.57084e-24
Squamous / Mucinous / Basal	NBN	0.0786528	0.598567	0.288	0.267	1
Squamous / Mucinous / Basal	TRIM28	0.146152	0.597484	0.294	0.28	1
Squamous / Mucinous / Basal	CIAO1	0.737332	0.594364	0.304	0.325	1
Squamous / Mucinous / Basal	CENPX	0.502525	0.593591	0.276	0.276	1
Squamous / Mucinous / Basal	TAOK1	0.00154121	0.592411	0.485	0.448	1
Squamous / Mucinous / Basal	MOB1A	0.461326	0.58916	0.267	0.271	1
Squamous / Mucinous / Basal	CRK	0.319558	0.588394	0.279	0.282	1
Squamous / Mucinous / Basal	FBXO28	0.0289985	0.587816	0.298	0.27	1
Squamous / Mucinous / Basal	RHBDD1	8.11503e-17	0.587241	0.356	0.194	2.77696e-12
Squamous / Mucinous / Basal	COA3	0.057838	0.586656	0.236	0.314	1
Squamous / Mucinous / Basal	FBXO22	0.349602	0.585501	0.252	0.249	1
Squamous / Mucinous / Basal	BCL2L13	0.511322	0.585157	0.267	0.272	1
Squamous / Mucinous / Basal	ARNT	0.0314676	0.583292	0.27	0.239	1
Squamous / Mucinous / Basal	SOCS6	0.0010674	0.583277	0.258	0.196	1
Squamous / Mucinous / Basal	EPAS1	2.42145e-36	0.583007	0.475	0.223	8.28622e-32
Squamous / Mucinous / Basal	GNL3	0.0679192	0.582844	0.353	0.333	1
Squamous / Mucinous / Basal	SAR1A	0.652693	0.581935	0.27	0.283	1
Squamous / Mucinous / Basal	ZNF721	0.00243729	0.581875	0.402	0.377	1
Squamous / Mucinous / Basal	EIF2AK4	0.956871	0.580501	0.245	0.274	1
Squamous / Mucinous / Basal	MAD1L1	0.00249008	0.579882	0.334	0.291	1
Squamous / Mucinous / Basal	MBTPS1	0.354962	0.579667	0.313	0.322	1
Squamous / Mucinous / Basal	GPR107	0.180859	0.576773	0.261	0.245	1
Squamous / Mucinous / Basal	XPO4	0.017084	0.576763	0.313	0.281	1
Squamous / Mucinous / Basal	HSD17B12	0.997289	0.576394	0.267	0.29	1
Squamous / Mucinous / Basal	TRIM37	0.0145651	0.574763	0.276	0.238	1
Squamous / Mucinous / Basal	ANKFY1	0.766113	0.572848	0.248	0.265	1
Squamous / Mucinous / Basal	PSMG3	0.84216	0.572829	0.261	0.278	1
Squamous / Mucinous / Basal	SNHG16	0.137629	0.570641	0.264	0.24	1
Squamous / Mucinous / Basal	RAB5IF	3.9323e-05	0.569608	0.402	0.336	1
Squamous / Mucinous / Basal	PPP4R3A	0.0303621	0.568426	0.365	0.345	1
Squamous / Mucinous / Basal	BICDL1	3.31735e-21	0.567773	0.255	0.098	1.1352e-16
Squamous / Mucinous / Basal	CSNK2A1	0.0766167	0.567084	0.402	0.406	1
Squamous / Mucinous / Basal	ANXA7	0.530868	0.564839	0.282	0.29	1
Squamous / Mucinous / Basal	SFT2D1	0.0683558	0.563707	0.325	0.315	1
Squamous / Mucinous / Basal	IFNAR1	0.346063	0.562781	0.294	0.296	1
Squamous / Mucinous / Basal	PSMB7	0.322685	0.559673	0.439	0.47	1
Squamous / Mucinous / Basal	GTPBP10	0.0061935	0.559321	0.267	0.223	1
Squamous / Mucinous / Basal	PCBD1	0.0965057	0.55753	0.273	0.266	1
Squamous / Mucinous / Basal	TRAK1	0.000489419	0.556965	0.377	0.314	1
Squamous / Mucinous / Basal	AKAP10	0.09225	0.556252	0.291	0.273	1
Squamous / Mucinous / Basal	SEPTIN2	0.000409024	0.554793	0.561	0.532	1
Squamous / Mucinous / Basal	ECH1	0.600419	0.554494	0.298	0.307	1
Squamous / Mucinous / Basal	TBC1D14	0.0891148	0.554084	0.279	0.256	1
Squamous / Mucinous / Basal	TUBA1C	0.268621	0.553624	0.31	0.31	1
Squamous / Mucinous / Basal	CTNNBL1	0.808472	0.553071	0.236	0.252	1
Squamous / Mucinous / Basal	OARD1	0.860005	0.552015	0.23	0.252	1
Squamous / Mucinous / Basal	INTS3	0.000122865	0.550057	0.301	0.232	1
Squamous / Mucinous / Basal	AK2	0.117174	0.548168	0.368	0.376	1
Squamous / Mucinous / Basal	CHMP3	0.0380219	0.547489	0.383	0.371	1
Squamous / Mucinous / Basal	GOSR1	0.181413	0.546648	0.365	0.37	1
Squamous / Mucinous / Basal	HMGXB3	0.0442577	0.544011	0.294	0.266	1
Squamous / Mucinous / Basal	XPO7	0.089128	0.543443	0.282	0.26	1
Squamous / Mucinous / Basal	WBP2	0.832358	0.540794	0.233	0.262	1
Squamous / Mucinous / Basal	GOLGA2	0.238766	0.540078	0.301	0.297	1
Squamous / Mucinous / Basal	PSMA5	0.70227	0.539296	0.328	0.353	1
Squamous / Mucinous / Basal	NUP98	1.7596e-06	0.538634	0.387	0.307	0.0602136
Squamous / Mucinous / Basal	SRSF1	0.0737644	0.538412	0.408	0.413	1
Squamous / Mucinous / Basal	ADIPOR1	0.338624	0.537421	0.273	0.269	1
Squamous / Mucinous / Basal	TM9SF4	0.033371	0.535894	0.316	0.293	1
Squamous / Mucinous / Basal	ATP5IF1	0.00598073	0.533439	0.248	0.363	1
Squamous / Mucinous / Basal	CMPK1	0.518303	0.532606	0.368	0.397	1
Squamous / Mucinous / Basal	NUCB1	0.590622	0.532604	0.273	0.312	1
Squamous / Mucinous / Basal	VPS28	0.397337	0.532438	0.402	0.432	1
Squamous / Mucinous / Basal	UFC1	0.43889	0.529378	0.347	0.373	1
Squamous / Mucinous / Basal	CLPTM1L	0.0781517	0.528008	0.298	0.272	1
Squamous / Mucinous / Basal	FAM168B	0.480302	0.527086	0.298	0.305	1
Squamous / Mucinous / Basal	SLC30A5	0.2531	0.525859	0.27	0.254	1
Squamous / Mucinous / Basal	MLXIP	0.489598	0.525171	0.23	0.269	1
Squamous / Mucinous / Basal	ABCE1	0.246898	0.5246	0.291	0.287	1
Squamous / Mucinous / Basal	ARHGEF4	1.1164e-47	0.52273	0.365	0.117	3.82031e-43
Squamous / Mucinous / Basal	WASHC4	0.0417273	0.521097	0.334	0.303	1
Squamous / Mucinous / Basal	TMBIM4	0.0268408	0.520828	0.454	0.45	1
Squamous / Mucinous / Basal	RPTOR	1.55617e-16	0.520226	0.482	0.33	5.32522e-12
Squamous / Mucinous / Basal	INTS10	0.0396896	0.51677	0.35	0.324	1
Squamous / Mucinous / Basal	SLC30A9	0.510004	0.516477	0.285	0.341	1
Squamous / Mucinous / Basal	SCARB2	0.043127	0.514951	0.436	0.428	1
Squamous / Mucinous / Basal	GALK2	2.57627e-06	0.514832	0.356	0.269	0.0881599
Squamous / Mucinous / Basal	MGA	0.0299792	0.513322	0.337	0.31	1
Squamous / Mucinous / Basal	TMX2	0.644774	0.511102	0.331	0.348	1
Squamous / Mucinous / Basal	SRP72	0.553298	0.505543	0.35	0.367	1
Squamous / Mucinous / Basal	MSH3	0.147533	0.505342	0.313	0.305	1
Squamous / Mucinous / Basal	UBA1	0.746146	0.500864	0.258	0.294	1
Squamous / Mucinous / Basal	SPTLC1	0.839079	0.499702	0.261	0.28	1
Squamous / Mucinous / Basal	BTBD7	0.899173	0.499213	0.288	0.314	1
Squamous / Mucinous / Basal	CNOT6	0.00155395	0.499039	0.279	0.226	1
Squamous / Mucinous / Basal	SUZ12	0.65698	0.498293	0.31	0.336	1
Squamous / Mucinous / Basal	CTTNBP2NL	0.000509129	0.497624	0.264	0.204	1
Squamous / Mucinous / Basal	SEC23A	0.126197	0.497092	0.291	0.277	1
Squamous / Mucinous / Basal	ACBD3	0.67522	0.496681	0.331	0.365	1
Squamous / Mucinous / Basal	SUPT5H	0.0612624	0.495485	0.334	0.307	1
Squamous / Mucinous / Basal	SUCLA2	0.0581299	0.495189	0.291	0.283	1
Squamous / Mucinous / Basal	TAF10	0.522678	0.491831	0.267	0.275	1
Squamous / Mucinous / Basal	TYW1	0.00167534	0.487945	0.374	0.33	1
Squamous / Mucinous / Basal	RNF111	0.0320894	0.486735	0.331	0.303	1
Squamous / Mucinous / Basal	CLDND1	0.649683	0.486247	0.282	0.296	1
Squamous / Mucinous / Basal	DBNL	0.542303	0.486063	0.276	0.283	1
Squamous / Mucinous / Basal	SBNO1	0.72588	0.479752	0.261	0.296	1
Squamous / Mucinous / Basal	CAND1	0.864243	0.47952	0.344	0.376	1
Squamous / Mucinous / Basal	XRCC6	0.000832163	0.478063	0.497	0.447	1
Squamous / Mucinous / Basal	ATP6V0D1	0.748589	0.476212	0.239	0.264	1
Squamous / Mucinous / Basal	CYP51A1	0.319645	0.475848	0.294	0.29	1
Squamous / Mucinous / Basal	NFE2L2	7.51862e-08	0.475703	0.528	0.452	0.00257287
Squamous / Mucinous / Basal	BIRC3	1.02201e-27	0.475418	0.319	0.119	3.49732e-23
Squamous / Mucinous / Basal	FOXK2	6.26067e-06	0.47314	0.411	0.336	0.21424
Squamous / Mucinous / Basal	FOXK1	0.525278	0.472867	0.273	0.279	1
Squamous / Mucinous / Basal	DDOST	0.84522	0.468907	0.337	0.366	1
Squamous / Mucinous / Basal	USP8	0.440886	0.466724	0.294	0.346	1
Squamous / Mucinous / Basal	NOP58	7.96969e-05	0.466079	0.488	0.441	1
Squamous / Mucinous / Basal	VPS29	0.50524	0.463701	0.368	0.393	1
Squamous / Mucinous / Basal	BRD2	0.0109544	0.462981	0.436	0.418	1
Squamous / Mucinous / Basal	MRPS34	0.482678	0.462688	0.35	0.369	1
Squamous / Mucinous / Basal	AQR	0.876322	0.460358	0.255	0.272	1
Squamous / Mucinous / Basal	UBE4A	0.721793	0.458695	0.227	0.253	1
Squamous / Mucinous / Basal	C1orf43	0.0421167	0.455343	0.469	0.462	1
Squamous / Mucinous / Basal	APPL2	0.371583	0.451389	0.267	0.26	1
Squamous / Mucinous / Basal	ERP44	0.196432	0.450782	0.337	0.349	1
Squamous / Mucinous / Basal	MRPL43	0.257338	0.450033	0.242	0.289	1
Squamous / Mucinous / Basal	SNRNP200	0.872668	0.449397	0.319	0.36	1
Squamous / Mucinous / Basal	TMF1	0.963563	0.448145	0.261	0.28	1
Squamous / Mucinous / Basal	MARK2	0.000181478	0.447533	0.319	0.26	1
Squamous / Mucinous / Basal	ERP29	0.105055	0.446589	0.42	0.421	1
Squamous / Mucinous / Basal	SUMF2	0.0754648	0.446054	0.359	0.348	1
Squamous / Mucinous / Basal	SYNRG	0.0497929	0.445825	0.328	0.299	1
Squamous / Mucinous / Basal	EYA3	0.94967	0.445606	0.242	0.264	1
Squamous / Mucinous / Basal	SIK2	9.6928e-07	0.44205	0.374	0.285	0.0331688
Squamous / Mucinous / Basal	MINDY2	0.452543	0.439379	0.224	0.258	1
Squamous / Mucinous / Basal	RHOT1	0.0827236	0.439219	0.316	0.292	1
Squamous / Mucinous / Basal	KLHL20	0.426029	0.436746	0.255	0.253	1
Squamous / Mucinous / Basal	PHYKPL	0.308931	0.435787	0.282	0.282	1
Squamous / Mucinous / Basal	AKR1A1	0.804635	0.432815	0.304	0.324	1
Squamous / Mucinous / Basal	MTG1	0.398441	0.4327	0.258	0.258	1
Squamous / Mucinous / Basal	MMP24OS	0.482129	0.432666	0.224	0.255	1
Squamous / Mucinous / Basal	NOSIP	0.878489	0.432419	0.236	0.256	1
Squamous / Mucinous / Basal	ALG5	0.0841665	0.431779	0.227	0.289	1
Squamous / Mucinous / Basal	FAM50A	0.924703	0.430563	0.282	0.314	1
Squamous / Mucinous / Basal	ICE1	0.00519987	0.429407	0.337	0.295	1
Squamous / Mucinous / Basal	RUVBL1	0.0969145	0.429241	0.193	0.255	1
Squamous / Mucinous / Basal	CASC9	1.19631e-267	0.42754	0.509	0.047	4.09377e-263
Squamous / Mucinous / Basal	SNF8	0.173465	0.426573	0.34	0.326	1
Squamous / Mucinous / Basal	NELFE	0.728434	0.426274	0.267	0.274	1
Squamous / Mucinous / Basal	TFCP2	0.0819211	0.42453	0.359	0.342	1
Squamous / Mucinous / Basal	API5	0.193932	0.42275	0.273	0.262	1
Squamous / Mucinous / Basal	EIF4E	0.814369	0.422601	0.319	0.354	1
Squamous / Mucinous / Basal	MRPS15	0.564804	0.421345	0.236	0.271	1
Squamous / Mucinous / Basal	RAB27B	2.66886e-42	0.420071	0.38	0.134	9.13286e-38
Squamous / Mucinous / Basal	CCDC12	0.426808	0.41784	0.288	0.287	1
Squamous / Mucinous / Basal	TRAF4	0.0018821	0.417824	0.328	0.278	1
Squamous / Mucinous / Basal	PPP4R3B	0.186611	0.4176	0.402	0.413	1
Squamous / Mucinous / Basal	DNAJC7	0.520169	0.415087	0.325	0.379	1
Squamous / Mucinous / Basal	SLTM	0.0816472	0.414743	0.457	0.463	1
Squamous / Mucinous / Basal	C6orf89	0.37989	0.412386	0.276	0.281	1
Squamous / Mucinous / Basal	SDF4	0.737385	0.411355	0.276	0.31	1
Squamous / Mucinous / Basal	SMARCC2	0.0967991	0.410963	0.199	0.258	1
Squamous / Mucinous / Basal	RBL2	0.452232	0.410574	0.236	0.27	1
Squamous / Mucinous / Basal	UBN1	0.904237	0.409886	0.233	0.251	1
Squamous / Mucinous / Basal	NME3	0.711117	0.409116	0.368	0.396	1
Squamous / Mucinous / Basal	NAA50	0.0155638	0.406738	0.362	0.337	1
Squamous / Mucinous / Basal	RNF114	0.564802	0.405013	0.316	0.326	1
Squamous / Mucinous / Basal	SAP30BP	0.816226	0.40405	0.273	0.305	1
Squamous / Mucinous / Basal	PCBP2	0.0235235	0.400515	0.574	0.6	1
Squamous / Mucinous / Basal	PSMA1	0.616641	0.398968	0.436	0.481	1
Squamous / Mucinous / Basal	CLCN3	0.490598	0.398117	0.347	0.365	1
Squamous / Mucinous / Basal	MED15	7.62526e-05	0.397556	0.371	0.305	1
Squamous / Mucinous / Basal	USP14	0.45313	0.396942	0.34	0.364	1
Squamous / Mucinous / Basal	IQCB1	0.890609	0.396793	0.242	0.258	1
Squamous / Mucinous / Basal	PRKAR1A	0.944972	0.39204	0.347	0.379	1
Squamous / Mucinous / Basal	PMS1	0.961019	0.390256	0.264	0.293	1
Squamous / Mucinous / Basal	ATXN2L	0.336115	0.388755	0.236	0.283	1
Squamous / Mucinous / Basal	HMGA1	0.428337	0.386291	0.276	0.274	1
Squamous / Mucinous / Basal	TCF25	5.33579e-08	0.38461	0.577	0.53	0.00182591
Squamous / Mucinous / Basal	UFM1	0.110364	0.38408	0.282	0.365	1
Squamous / Mucinous / Basal	ISCU	0.614718	0.383518	0.255	0.282	1
Squamous / Mucinous / Basal	SPPL2A	0.861916	0.382755	0.298	0.317	1
Squamous / Mucinous / Basal	ARAP2	0.000336409	0.381851	0.307	0.234	1
Squamous / Mucinous / Basal	DPM3	0.0523474	0.381203	0.209	0.274	1
Squamous / Mucinous / Basal	HTT	0.593243	0.378387	0.316	0.334	1
Squamous / Mucinous / Basal	ARCN1	0.165957	0.377079	0.276	0.257	1
Squamous / Mucinous / Basal	PSMA4	0.35756	0.375757	0.31	0.37	1
Squamous / Mucinous / Basal	ODR4	0.0029253	0.369276	0.35	0.299	1
Squamous / Mucinous / Basal	ADI1	0.418987	0.367262	0.248	0.287	1
Squamous / Mucinous / Basal	MTCH2	0.571606	0.366749	0.304	0.35	1
Squamous / Mucinous / Basal	NDUFB10	0.304972	0.365336	0.331	0.418	1
Squamous / Mucinous / Basal	CPSF7	0.734395	0.364751	0.273	0.286	1
Squamous / Mucinous / Basal	SFSWAP	0.869736	0.363774	0.316	0.354	1
Squamous / Mucinous / Basal	YPEL5	0.923376	0.363043	0.264	0.297	1
Squamous / Mucinous / Basal	COPS5	0.019373	0.362233	0.224	0.308	1
Squamous / Mucinous / Basal	ANKRD13C	0.947868	0.362067	0.252	0.266	1
Squamous / Mucinous / Basal	PRPF3	0.00230174	0.360464	0.328	0.278	1
Squamous / Mucinous / Basal	OSBP	0.0165225	0.35912	0.261	0.221	1
Squamous / Mucinous / Basal	SLC39A6	0.189466	0.359071	0.23	0.282	1
Squamous / Mucinous / Basal	UQCC2	0.72025	0.357217	0.307	0.339	1
Squamous / Mucinous / Basal	WIPF2	0.594897	0.356546	0.27	0.271	1
Squamous / Mucinous / Basal	ABCF1	0.704088	0.356433	0.261	0.291	1
Squamous / Mucinous / Basal	CLSTN1	0.183633	0.355427	0.276	0.342	1
Squamous / Mucinous / Basal	NOP56	0.529649	0.3517	0.285	0.333	1
Squamous / Mucinous / Basal	LRRC58	0.088891	0.346726	0.196	0.252	1
Squamous / Mucinous / Basal	EIF4H	0.546232	0.346131	0.399	0.423	1
Squamous / Mucinous / Basal	NDUFV1	0.991941	0.344978	0.374	0.427	1
Squamous / Mucinous / Basal	PPP1R10	0.15643	0.344856	0.383	0.386	1
Squamous / Mucinous / Basal	CBR1	0.000347774	0.34346	0.184	0.293	1
Squamous / Mucinous / Basal	RNF10	0.89496	0.343129	0.282	0.313	1
Squamous / Mucinous / Basal	TMEM87B	8.71429e-13	0.341486	0.374	0.234	2.98203e-08
Squamous / Mucinous / Basal	AFG3L2	0.847213	0.340659	0.252	0.277	1
Squamous / Mucinous / Basal	MYEOV	3.5729e-95	0.338305	0.322	0.052	1.22265e-90
Squamous / Mucinous / Basal	ANP32A	0.654657	0.338254	0.353	0.394	1
Squamous / Mucinous / Basal	VPS50	0.733254	0.336622	0.267	0.286	1
Squamous / Mucinous / Basal	SEC13	0.743145	0.335211	0.301	0.32	1
Squamous / Mucinous / Basal	DHRS7	0.0790624	0.335174	0.233	0.3	1
Squamous / Mucinous / Basal	NDUFB8	0.104173	0.331856	0.322	0.411	1
Squamous / Mucinous / Basal	PSMD11	0.501228	0.330378	0.35	0.37	1
Squamous / Mucinous / Basal	LAMP1	0.881305	0.330096	0.377	0.422	1
Squamous / Mucinous / Basal	FAF2	0.692796	0.330065	0.304	0.318	1
Squamous / Mucinous / Basal	G3BP1	0.564108	0.329944	0.396	0.427	1
Squamous / Mucinous / Basal	MMADHC	0.260738	0.329929	0.242	0.29	1
Squamous / Mucinous / Basal	PPP2R5E	0.522792	0.328676	0.399	0.433	1
Squamous / Mucinous / Basal	PIGF	0.895006	0.328512	0.252	0.274	1
Squamous / Mucinous / Basal	CCPG1	0.187822	0.328387	0.233	0.285	1
Squamous / Mucinous / Basal	PSMD7	0.400159	0.327538	0.322	0.378	1
Squamous / Mucinous / Basal	NOP53	0.427395	0.326863	0.31	0.313	1
Squamous / Mucinous / Basal	COMT	0.00166117	0.325027	0.475	0.464	1
Squamous / Mucinous / Basal	DCAF7	0.631995	0.324908	0.316	0.354	1
Squamous / Mucinous / Basal	UBE2M	0.364539	0.322789	0.23	0.266	1
Squamous / Mucinous / Basal	NDUFS3	0.00136005	0.32271	0.209	0.313	1
Squamous / Mucinous / Basal	UIMC1	0.407541	0.32228	0.279	0.278	1
Squamous / Mucinous / Basal	GANAB	0.956541	0.319613	0.298	0.319	1
Squamous / Mucinous / Basal	DPP7	0.622486	0.319097	0.282	0.314	1
Squamous / Mucinous / Basal	NGLY1	0.304016	0.317462	0.261	0.258	1
Squamous / Mucinous / Basal	TTC1	0.0921295	0.317212	0.273	0.343	1
Squamous / Mucinous / Basal	NMT1	0.637556	0.316628	0.273	0.305	1
Squamous / Mucinous / Basal	PA2G4	0.811555	0.315804	0.356	0.394	1
Squamous / Mucinous / Basal	SDHD	0.0511199	0.313574	0.212	0.277	1
Squamous / Mucinous / Basal	PTOV1	0.152583	0.312121	0.252	0.31	1
Squamous / Mucinous / Basal	MPC2	0.439095	0.310962	0.319	0.329	1
Squamous / Mucinous / Basal	GLYR1	0.868089	0.307497	0.285	0.304	1
Squamous / Mucinous / Basal	SUGT1	0.341651	0.307418	0.258	0.307	1
Squamous / Mucinous / Basal	TMX1	0.192228	0.307193	0.215	0.265	1
Squamous / Mucinous / Basal	MRPL3	0.659367	0.306532	0.34	0.389	1
Squamous / Mucinous / Basal	SMARCE1	0.35882	0.304949	0.294	0.346	1
Squamous / Mucinous / Basal	HNRNPUL1	0.978833	0.302829	0.331	0.364	1
Squamous / Mucinous / Basal	CCDC90B	0.0176466	0.300048	0.19	0.268	1
Squamous / Mucinous / Basal	ABL1	0.746452	0.300019	0.307	0.318	1
Squamous / Mucinous / Basal	SRP19	0.012608	0.299822	0.264	0.361	1
Squamous / Mucinous / Basal	MRPS16	0.039578	0.299608	0.206	0.274	1
Squamous / Mucinous / Basal	PSME1	0.0623184	0.29911	0.227	0.299	1
Squamous / Mucinous / Basal	HEBP2	3.7411e-05	0.297248	0.328	0.261	1
Squamous / Mucinous / Basal	DDX1	0.275926	0.295637	0.255	0.307	1
Squamous / Mucinous / Basal	DIS3L2	0.0048801	0.295579	0.368	0.336	1
Squamous / Mucinous / Basal	TMEM106B	0.99052	0.295547	0.362	0.393	1
Squamous / Mucinous / Basal	PGRMC2	0.0536632	0.295283	0.19	0.256	1
Squamous / Mucinous / Basal	ADRM1	0.417869	0.291355	0.285	0.329	1
Squamous / Mucinous / Basal	GBF1	3.03959e-05	0.290863	0.387	0.314	1
Squamous / Mucinous / Basal	IMPDH2	0.403729	0.29029	0.267	0.306	1
Squamous / Mucinous / Basal	DNAJA2	0.0652887	0.290238	0.193	0.256	1
Squamous / Mucinous / Basal	NUDT3	0.0188827	0.290034	0.368	0.352	1
Squamous / Mucinous / Basal	TMEM183A	0.180929	0.289914	0.209	0.256	1
Squamous / Mucinous / Basal	CNDP2	0.729867	0.289867	0.236	0.263	1
Squamous / Mucinous / Basal	TARDBP	0.0469678	0.289289	0.224	0.297	1
Squamous / Mucinous / Basal	CEP95	0.00444765	0.289155	0.331	0.302	1
Squamous / Mucinous / Basal	MRPS7	0.00970553	0.286827	0.202	0.282	1
Squamous / Mucinous / Basal	DENR	0.432881	0.285448	0.313	0.359	1
Squamous / Mucinous / Basal	APPBP2	0.412315	0.285419	0.313	0.328	1
Squamous / Mucinous / Basal	UBE2G2	0.0089473	0.283222	0.42	0.404	1
Squamous / Mucinous / Basal	CCT3	5.39426e-08	0.281323	0.592	0.545	0.00184592
[truncated: 9,196 more rows]

## Sheet: Tcell
celltype	gene	p_val	avg_log2FC	pct.1	pct.2	p_val_adj
CD8.01.GNLY	ZNF683	8.23097e-270	#NUM!	0.319	0.034	2.82561e-265
CD8.01.GNLY	IL2RB	2.20201e-19	#NUM!	0.327	0.205	7.55928e-15
CD8.01.GNLY	GTF3A	3.45958e-13	#NUM!	0.428	0.318	1.18764e-08
CD8.01.GNLY	DUSP2	4.72479e-09	#NUM!	0.471	0.38	0.000162197
CD8.01.GNLY	HELZ	1.01049e-05	#NUM!	0.402	0.338	0.346892
CD8.01.GNLY	ATP5F1C	7.52397e-05	#NUM!	0.34	0.275	1
CD8.01.GNLY	ATP5ME	9.32018e-05	#NUM!	0.274	0.219	1
CD8.01.GNLY	ATP5MF	0.0163777	#NUM!	0.257	0.224	1
CD8.01.GNLY	MECP2	0.420116	#NUM!	0.335	0.327	1
CD8.01.GNLY	FKBP5	0.651254	#NUM!	0.654	0.661	1
CD8.01.GNLY	NIN	0.0498199	498.104	0.287	0.317	1
CD8.01.GNLY	NOP10	0.000116077	353.861	0.274	0.217	1
CD8.01.GNLY	ITSN2	0.105799	327.892	0.413	0.394	1
CD8.01.GNLY	UBE2N	0.0011618	314.908	0.303	0.254	1
CD8.01.GNLY	ITGA1	4.70142e-44	301.924	0.319	0.147	1.61395e-39
CD8.01.GNLY	ATP5F1D	1.12675e-08	296.596	0.397	0.307	0.000386802
CD8.01.GNLY	ATP5F1E	7.61344e-12	293.268	0.623	0.488	2.61362e-07
CD8.01.GNLY	RPS27L	2.26765e-05	271.627	0.385	0.32	0.778461
CD8.01.GNLY	CENPC	0.240634	252.868	0.277	0.263	1
CD8.01.GNLY	ZBTB20	0.305494	242.773	0.566	0.573	1
CD8.01.GNLY	IQGAP2	0.175394	206.68	0.573	0.543	1
CD8.01.GNLY	XIST	0.00075974	185.065	0.223	0.279	1
CD8.01.GNLY	PSMD8	7.89207e-08	179.295	0.309	0.231	0.00270927
CD8.01.GNLY	YWHAE	0.387388	173.524	0.295	0.285	1
CD8.01.GNLY	UBE2D2	0.0382201	170.638	0.478	0.451	1
CD8.01.GNLY	TUBB	0.000502127	153.326	0.262	0.212	1
CD8.01.GNLY	PRKDC	0.0797193	151.883	0.303	0.28	1
CD8.01.GNLY	JAK1	0.000387612	147.555	0.627	0.579	1
CD8.01.GNLY	ABCC1	0.630789	141.785	0.301	0.297	1
CD8.01.GNLY	TCF12	0.104997	134.571	0.382	0.356	1
CD8.01.GNLY	FKBP11	2.37452e-15	120.144	0.252	0.153	8.1515e-11
CD8.01.GNLY	GRB2	0.000223131	120.144	0.388	0.332	1
CD8.01.GNLY	TNIK	0.342057	118.701	0.387	0.365	1
CD8.01.GNLY	SMARCC1	0.272559	111.488	0.245	0.266	1
CD8.01.GNLY	ANKRD36	0.0574885	108.419	0.259	0.289	1
CD8.01.GNLY	GPR174	0.0767324	107.16	0.275	0.252	1
CD8.01.GNLY	RAB10	0.0416888	101.385	0.312	0.288	1
CD8.01.GNLY	ACAP2	0.0266877	98.5037	0.399	0.369	1
CD8.01.GNLY	HSPA4	1.26215e-07	95.6183	0.252	0.184	0.00433283
CD8.01.GNLY	MBNL1	0.177349	94.1756	0.806	0.782	1
CD8.01.GNLY	REL	1.26245e-11	92.7329	0.386	0.292	4.33388e-07
CD8.01.GNLY	BRD4	0.0119144	91.2902	0.31	0.273	1
CD8.01.GNLY	MDFIC	0.0225034	91.2902	0.397	0.363	1
CD8.01.GNLY	EIF3D	0.000325083	89.8475	0.305	0.255	1
CD8.01.GNLY	KLF2	0.175485	88.2217	0.317	0.291	1
CD8.01.GNLY	ZAP70	5.31117e-06	86.9621	0.365	0.299	0.182327
CD8.01.GNLY	SERBP1	0.000227546	86.9621	0.388	0.338	1
CD8.01.GNLY	HMOX2	2.56525e-06	84.0767	0.302	0.232	0.0880624
CD8.01.GNLY	PRDM1	0.820721	84.0767	0.355	0.35	1
CD8.01.GNLY	COA1	0.484584	71.0224	0.289	0.282	1
CD8.01.GNLY	FOXO1	0.00407714	66.7644	0.391	0.436	1
CD8.01.GNLY	ARHGAP45	1.85281e-07	58.1082	0.304	0.231	0.00636051
CD8.01.GNLY	AAK1	0.538271	53.7704	0.522	0.52	1
CD8.01.GNLY	MZT2B	1.39505e-07	50.8947	0.362	0.282	0.00478906
CD8.01.GNLY	SEM1	0.220598	46.5667	0.33	0.31	1
CD8.01.GNLY	BABAM2	0.886034	46.5667	0.3	0.3	1
CD8.01.GNLY	CAPZB	0.00757592	46.5667	0.609	0.566	1
CD8.01.GNLY	ASB3	0.0451625	46.5666	0.26	0.235	1
CD8.01.GNLY	OFD1	0.00150061	45.124	0.312	0.268	1
CD8.01.GNLY	MON2	0.508895	42.2386	0.311	0.3	1
CD8.01.GNLY	DIP2A	3.02795e-05	40.7959	0.338	0.278	1
CD8.01.GNLY	TPD52	2.11658e-10	40.6127	0.28	0.192	7.26602e-06
CD8.01.GNLY	UBL3	4.45022e-06	38.6126	0.317	0.257	0.152772
CD8.01.GNLY	BAX	7.58221e-07	36.4678	0.314	0.245	0.026029
CD8.01.GNLY	ARRB2	1.4356e-11	36.4676	0.289	0.2	4.92828e-07
CD8.01.GNLY	TGFBR2	0.91362	35.0251	0.425	0.43	1
CD8.01.GNLY	EVI2B	2.02024e-05	33.5824	0.369	0.305	0.693529
CD8.01.GNLY	ARL15	0.128496	33.5824	0.363	0.384	1
CD8.01.GNLY	FOXN3	0.14146	33.5786	0.566	0.545	1
CD8.01.GNLY	TTC19	0.00384757	30.697	0.291	0.25	1
CD8.01.GNLY	MORF4L2	3.16407e-10	27.8116	0.268	0.186	1.08619e-05
CD8.01.GNLY	USP25	0.220538	27.8116	0.302	0.289	1
CD8.01.GNLY	AFF4	5.53618e-06	27.8116	0.327	0.258	0.190051
CD8.01.GNLY	SCFD1	0.00190381	26.3689	0.257	0.216	1
CD8.01.GNLY	NFATC2	3.21149e-05	26.1858	0.443	0.381	1
CD8.01.GNLY	CCDC85B	4.54732e-09	24.9262	0.289	0.209	0.000156105
CD8.01.GNLY	ANKRD17	0.215371	24.9262	0.369	0.346	1
CD8.01.GNLY	NLRC3	0.00223125	24.9249	0.265	0.225	1
CD8.01.GNLY	TLE4	1.68938e-08	23.4835	0.304	0.229	0.000579946
CD8.01.GNLY	SLC4A7	0.786833	23.4835	0.376	0.367	1
CD8.01.GNLY	POLR2A	0.00291424	19.1554	0.259	0.219	1
CD8.01.GNLY	STAT5B	0.928138	19.1554	0.314	0.322	1
CD8.01.GNLY	PARP4	0.796559	17.6995	0.276	0.279	1
CD8.01.GNLY	PRDM2	0.0002705	16.6183	0.368	0.316	1
CD8.01.GNLY	CCDC12	0.0404707	16.2701	0.252	0.225	1
CD8.01.GNLY	BTAF1	0.00432307	16.2701	0.258	0.221	1
CD8.01.GNLY	DYNC1H1	0.113285	16.2701	0.373	0.351	1
CD8.01.GNLY	SMCHD1	0.00600299	16.2701	0.632	0.67	1
CD8.01.GNLY	USP47	0.0113211	13.3847	0.345	0.312	1
CD8.01.GNLY	IL10RA	0.196753	13.3847	0.345	0.333	1
CD8.01.GNLY	PRPF38B	0.0105627	13.3842	0.397	0.36	1
CD8.01.GNLY	PDS5A	0.319622	13.3842	0.328	0.317	1
CD8.01.GNLY	TRAM1	0.000981361	10.4993	0.3	0.255	1
CD8.01.GNLY	NIBAN1	4.03741e-05	9.07944	0.465	0.409	1
CD8.01.GNLY	PPDPF	3.11657e-05	9.0627	0.447	0.361	1
CD8.01.GNLY	EIF4H	0.00117088	4.72849	0.254	0.209	1
CD8.01.GNLY	CEP350	0.975398	4.72849	0.286	0.287	1
CD8.01.GNLY	H3-3A	4.89053e-18	4.46782	0.387	0.257	1.67887e-13
CD8.01.GNLY	SEPTIN7	3.41267e-11	4.02618	0.558	0.48	1.17153e-06
CD8.01.GNLY	PTPN22	3.60891e-21	3.2858	0.526	0.386	1.2389e-16
CD8.01.GNLY	TC2N	0.00340646	3.2858	0.509	0.471	1
CD8.01.GNLY	PARP8	1.05766e-16	3.28579	0.781	0.695	3.63085e-12
CD8.01.GNLY	SEPTIN1	0.0317742	0.541273	0.273	0.246	1
CD8.02.PDCD1	TNFRSF9	7.33375e-236	#NUM!	0.414	0.078	2.5176e-231
CD8.02.PDCD1	SNAP47	3.77209e-233	#NUM!	0.459	0.1	1.29492e-228
CD8.02.PDCD1	FABP5	3.17988e-197	#NUM!	0.486	0.131	1.09162e-192
CD8.02.PDCD1	CTSD	1.62534e-168	#NUM!	0.65	0.277	5.57963e-164
CD8.02.PDCD1	HLA-DMA	8.45896e-147	#NUM!	0.432	0.129	2.90387e-142
CD8.02.PDCD1	COTL1	1.74154e-137	#NUM!	0.784	0.487	5.97854e-133
CD8.02.PDCD1	APOBEC3G	4.78637e-132	#NUM!	0.644	0.306	1.64311e-127
CD8.02.PDCD1	CD63	2.41624e-127	#NUM!	0.635	0.311	8.29472e-123
CD8.02.PDCD1	RHOA	5.1992e-116	#NUM!	0.757	0.473	1.78483e-111
CD8.02.PDCD1	CALR	6.00105e-107	#NUM!	0.62	0.317	2.0601e-102
CD8.02.PDCD1	CRTAM	2.36262e-95	#NUM!	0.355	0.121	8.11063e-91
CD8.02.PDCD1	PPIB	2.18139e-93	#NUM!	0.65	0.375	7.4885e-89
CD8.02.PDCD1	PDIA6	3.15896e-93	#NUM!	0.481	0.213	1.08444e-88
CD8.02.PDCD1	PCBP1	7.70855e-92	#NUM!	0.532	0.253	2.64627e-87
CD8.02.PDCD1	WDR83OS	1.68785e-90	#NUM!	0.51	0.24	5.79423e-86
CD8.02.PDCD1	CD82	3.92224e-85	#NUM!	0.438	0.186	1.34647e-80
CD8.02.PDCD1	GNG5	3.72729e-81	#NUM!	0.499	0.244	1.27954e-76
CD8.02.PDCD1	RAB27A	1.12601e-77	#NUM!	0.619	0.366	3.86549e-73
CD8.02.PDCD1	NDUFC2	1.71854e-73	#NUM!	0.447	0.207	5.89957e-69
CD8.02.PDCD1	NDUFA7	4.55603e-72	#NUM!	0.338	0.129	1.56404e-67
CD8.02.PDCD1	PRR13	7.05211e-72	#NUM!	0.542	0.293	2.42092e-67
CD8.02.PDCD1	COX7B	2.35515e-68	#NUM!	0.5	0.252	8.085e-64
CD8.02.PDCD1	MT-ND6	1.22477e-61	#NUM!	0.453	0.231	4.20451e-57
CD8.02.PDCD1	OST4	1.54805e-61	#NUM!	0.654	0.416	5.3143e-57
CD8.02.PDCD1	ATP5PF	3.32951e-61	#NUM!	0.443	0.223	1.14299e-56
[truncated: 1,490 more rows]

## Sheet: BMDM
celltype	gene	p_val	avg_log2FC	pct.1	pct.2	p_val_adj
[truncated: 11,989 more rows]

[truncated: 3 more sheets: MDM, Neus, DCs]
