# Supplementary material for: Lineage Memory and Convergent Adaptation Dictate the Single-Cell and Spatial Architecture of Brain Malignancies
Source: bioRxiv preprint, doi:10.64898/2026.06.15.732237, version 1 (2026-06-16)
Supplement: Table S3 [file 732237_file05.xlsx]

## Sheet: Malignant
Gavish et al			Gonzalez et al			Xing et al
PMID: 37258682 DOI: 10.1038/s41586-023-06130-4			PMID: 35063085 DOI: 10.1016/j.cell.2021.12.043			PMID: 40215980 DOI: 10.1016/j.ccell.2025.03.025
celltype	symbol		celltype	symbol		celltype	symbol
MP1 Cell Cycle - G2/M	TOP2A		P1_DNA Replication	FEN1		MP1_G2M	TOP2A
MP1 Cell Cycle - G2/M	UBE2C		P1_DNA Replication	MCM7		MP1_G2M	BIRC5
MP1 Cell Cycle - G2/M	HMGB2		P1_DNA Replication	NASP		MP1_G2M	NUSAP1
MP1 Cell Cycle - G2/M	NUSAP1		P1_DNA Replication	PCNA		MP1_G2M	CENPF
MP1 Cell Cycle - G2/M	CENPF		P1_DNA Replication	RFC4		MP1_G2M	UBE2C
MP1 Cell Cycle - G2/M	CCNB1		P1_DNA Replication	RRM2		MP1_G2M	PTTG1
MP1 Cell Cycle - G2/M	TPX2		P1_DNA Replication	RNASEH2A		MP1_G2M	HMGB2
MP1 Cell Cycle - G2/M	CKS2		P1_DNA Replication	CLSPN		MP1_G2M	TPX2
MP1 Cell Cycle - G2/M	BIRC5		P1_DNA Replication	ATAD5		MP1_G2M	CDKN3
MP1 Cell Cycle - G2/M	PRC1		P1_DNA Replication	HMGB2		MP1_G2M	PRC1
MP1 Cell Cycle - G2/M	PTTG1		P2_G2/M	BIRC5		MP1_G2M	CDK1
MP1 Cell Cycle - G2/M	KPNA2		P2_G2/M	CDK1		MP1_G2M	CKS1B
MP1 Cell Cycle - G2/M	MKI67		P2_G2/M	CDC20		MP1_G2M	SMC4
MP1 Cell Cycle - G2/M	CDC20		P2_G2/M	CENPA		MP1_G2M	MKI67
MP1 Cell Cycle - G2/M	CDK1		P2_G2/M	KIFC1		MP1_G2M	CCNB1
MP1 Cell Cycle - G2/M	CCNB2		P2_G2/M	MAD2L1		MP1_G2M	MAD2L1
MP1 Cell Cycle - G2/M	CDKN3		P2_G2/M	TOP2A		MP1_G2M	CENPW
MP1 Cell Cycle - G2/M	SMC4		P2_G2/M	PRC1		MP1_G2M	ASPM
MP1 Cell Cycle - G2/M	NUF2		P2_G2/M	CCNB2		MP1_G2M	UBE2T
MP1 Cell Cycle - G2/M	ARL6IP1		P2_G2/M	AURKB		MP1_G2M	UBE2S
MP1 Cell Cycle - G2/M	CKAP2		P3_Ribosome Biogenesis / Translation	RPL37		MP1_G2M	DLGAP5
MP1 Cell Cycle - G2/M	ASPM		P3_Ribosome Biogenesis / Translation	RPL29		MP1_G2M	KIF2C
MP1 Cell Cycle - G2/M	PLK1		P3_Ribosome Biogenesis / Translation	RPL12		MP1_G2M	CENPA
MP1 Cell Cycle - G2/M	CKS1B		P3_Ribosome Biogenesis / Translation	RPL39		MP1_G2M	CKAP2L
MP1 Cell Cycle - G2/M	CCNA2		P3_Ribosome Biogenesis / Translation	RPL32		MP1_G2M	ANP32E
MP1 Cell Cycle - G2/M	AURKA		P3_Ribosome Biogenesis / Translation	RPL35		MP1_G2M	KIF20A
MP1 Cell Cycle - G2/M	MAD2L1		P3_Ribosome Biogenesis / Translation	RPL31		MP1_G2M	CDCA8
MP1 Cell Cycle - G2/M	GTSE1		P3_Ribosome Biogenesis / Translation	RPL8		MP1_G2M	NCAPG
MP1 Cell Cycle - G2/M	HMMR		P3_Ribosome Biogenesis / Translation	RPL14		MP1_G2M	CCNF
MP1 Cell Cycle - G2/M	UBE2T		P4_Stress Response	ATF3		MP1_G2M	HJURP
MP1 Cell Cycle - G2/M	CENPE		P4_Stress Response	ANXA1		MP1_G2M	CKS2
MP1 Cell Cycle - G2/M	CENPA		P4_Stress Response	ZFP36L1		MP1_G2M	CDC20
MP1 Cell Cycle - G2/M	KIF20B		P4_Stress Response	CYBA		MP1_G2M	GTSE1
MP1 Cell Cycle - G2/M	AURKB		P4_Stress Response	DUSP1		MP1_G2M	H2AZ1
MP1 Cell Cycle - G2/M	CDCA3		P4_Stress Response	PPP1R15A		MP1_G2M	TROAP
MP1 Cell Cycle - G2/M	CDCA8		P4_Stress Response	FOS		MP1_G2M	PBK
MP1 Cell Cycle - G2/M	UBE2S		P4_Stress Response	NR4A1		MP1_G2M	KIF4A
MP1 Cell Cycle - G2/M	KNSTRN		P4_Stress Response	IGF2		MP1_G2M	CCNB2
MP1 Cell Cycle - G2/M	KIF2C		P4_Stress Response	JUNB		MP1_G2M	BKN2
MP1 Cell Cycle - G2/M	PBK		P4_Stress Response	ZFP36		MP1_G2M	AURKB
MP1 Cell Cycle - G2/M	TUBA1B		P5_Developmental Growth	MEIS2		MP1_G2M	DIAPH3
MP1 Cell Cycle - G2/M	DLGAP5		P5_Developmental Growth	ZNF609		MP1_G2M	PLK1
MP1 Cell Cycle - G2/M	TACC3		P5_Developmental Growth	PAXBP1		MP1_G2M	CDCA3
MP1 Cell Cycle - G2/M	STMN1		P5_Developmental Growth	MALAT1		MP1_G2M	KIF11
MP1 Cell Cycle - G2/M	DEPDC1		P5_Developmental Growth	ERBB2		MP1_G2M	KIF18B
MP1 Cell Cycle - G2/M	ECT2		P5_Developmental Growth	SOX4		MP1_G2M	NEK2
MP1 Cell Cycle - G2/M	CENPW		P5_Developmental Growth	HOXB3		MP1_G2M	CDCA2
MP1 Cell Cycle - G2/M	ZWINT		P5_Developmental Growth	ISL1		MP1_G2M	CEP55
MP1 Cell Cycle - G2/M	HIST1H4C		P5_Developmental Growth	DSP		MP1_G2M	NUF2
MP1 Cell Cycle - G2/M	KIF23		P5_Developmental Growth	CPLANE1		MP1_G2M	CENPM
MP2 Cell Cycle - G1/S	PCNA		P5_Developmental Growth	CDK12		MP2_G1S	TYMS
MP2 Cell Cycle - G1/S	RRM2		P6_pre-mRNA Maturation / core Spliceosome	DDX5		MP2_G1S	CLSPN
MP2 Cell Cycle - G1/S	FEN1		P6_pre-mRNA Maturation / core Spliceosome	HNRNPA1		MP2_G1S	FEN1
MP2 Cell Cycle - G1/S	GINS2		P6_pre-mRNA Maturation / core Spliceosome	HNRNPA2B1		MP2_G1S	PCNA
MP2 Cell Cycle - G1/S	TYMS		P6_pre-mRNA Maturation / core Spliceosome	HSPA8		MP2_G1S	RRM2
MP2 Cell Cycle - G1/S	MCM3		P6_pre-mRNA Maturation / core Spliceosome	SRSF3		MP2_G1S	UHRF1
MP2 Cell Cycle - G1/S	GMNN		P6_pre-mRNA Maturation / core Spliceosome	SNRPB		MP2_G1S	GINS2
MP2 Cell Cycle - G1/S	HIST1H4C		P6_pre-mRNA Maturation / core Spliceosome	SNRPF		MP2_G1S	MCM7
MP2 Cell Cycle - G1/S	CLSPN		P6_pre-mRNA Maturation / core Spliceosome	SRSF9		MP2_G1S	HELLS
MP2 Cell Cycle - G1/S	ATAD2		P6_pre-mRNA Maturation / core Spliceosome	HNRNPA3		MP2_G1S	ATAD5
MP2 Cell Cycle - G1/S	TK1		P7_ECM deposition / EMT	BGN		MP2_G1S	MCM2
MP2 Cell Cycle - G1/S	KIAA0101		P7_ECM deposition / EMT	COL1A1		MP2_G1S	RFC4
MP2 Cell Cycle - G1/S	DUT		P7_ECM deposition / EMT	COL3A1		MP2_G1S	MCM4
MP2 Cell Cycle - G1/S	HELLS		P7_ECM deposition / EMT	COL5A2		MP2_G1S	NASP
MP2 Cell Cycle - G1/S	MCM7		P7_ECM deposition / EMT	COL6A3		MP2_G1S	CDC6
MP2 Cell Cycle - G1/S	UBE2T		P7_ECM deposition / EMT	DCN		MP2_G1S	MCM5
MP2 Cell Cycle - G1/S	MCM4		P7_ECM deposition / EMT	LOXL2		MP2_G1S	EXO1
MP2 Cell Cycle - G1/S	CENPU		P7_ECM deposition / EMT	LUM		MP2_G1S	WDHD1
MP2 Cell Cycle - G1/S	DHFR		P7_ECM deposition / EMT	SPARC		MP2_G1S	TK1
MP2 Cell Cycle - G1/S	ZWINT		P7_ECM deposition / EMT	TIMP1		MP2_G1S	MCM3
MP2 Cell Cycle - G1/S	ASF1B		P7_ECM deposition / EMT	EMILIN1		MP2_G1S	DTL
MP2 Cell Cycle - G1/S	MCM5		P8_Inflammatory Response	B2M		MP2_G1S	MCM6
MP2 Cell Cycle - G1/S	DNAJC9		P8_Inflammatory Response	ANXA2		MP2_G1S	DBF4
MP2 Cell Cycle - G1/S	RFC4		P8_Inflammatory Response	IFI6		MP2_G1S	BLM
MP2 Cell Cycle - G1/S	HMGB2		P8_Inflammatory Response	IFI27		MP2_G1S	POLE2
MP2 Cell Cycle - G1/S	CDC6		P8_Inflammatory Response	IFITM3		MP2_G1S	UNG
MP2 Cell Cycle - G1/S	RRM1		P8_Inflammatory Response	BST2		MP2_G1S	CDCA7
MP2 Cell Cycle - G1/S	ORC6		P8_Inflammatory Response	CST3		MP2_G1S	CHAF1B
MP2 Cell Cycle - G1/S	CDK1		P8_Inflammatory Response	HLA-B		MP2_G1S	SLBP
MP2 Cell Cycle - G1/S	RAD51AP1		P8_Inflammatory Response	HLA-C		MP2_G1S	POLD3
MP2 Cell Cycle - G1/S	RNASEH2A		P8_Inflammatory Response	CD74		MP2_G1S	PRIM1
MP2 Cell Cycle - G1/S	CHAF1A		P8_Inflammatory Response	S100A11		MP2_G1S	E2F8
MP2 Cell Cycle - G1/S	CENPK		P8_Inflammatory Response	S100A13		MP2_G1S	GMNN
MP2 Cell Cycle - G1/S	CDCA5					MP2_G1S	RRM1
MP2 Cell Cycle - G1/S	SLBP					MP2_G1S	PCLAF
MP2 Cell Cycle - G1/S	MCM6					MP2_G1S	DSCC1
MP2 Cell Cycle - G1/S	TMEM106C					MP2_G1S	ORC6
MP2 Cell Cycle - G1/S	CENPM					MP2_G1S	CCNE2
MP2 Cell Cycle - G1/S	MYBL2					MP2_G1S	CDC45
MP2 Cell Cycle - G1/S	E2F1					MP2_G1S	GMNM
MP2 Cell Cycle - G1/S	USP1					MP2_G1S	UBE2V2
MP2 Cell Cycle - G1/S	DNMT1					MP2_G1S	POLA1
MP2 Cell Cycle - G1/S	PKMYT1					MP2_G1S	BRCA1
MP2 Cell Cycle - G1/S	MAD2L1					MP2_G1S	RNASEH2A
MP2 Cell Cycle - G1/S	PSMC3IP					MP2_G1S	FANCI
MP2 Cell Cycle - G1/S	CDCA4					MP2_G1S	RAD51
MP2 Cell Cycle - G1/S	RFC2					MP2_G1S	PKMYT1
MP2 Cell Cycle - G1/S	CDC45					MP2_G1S	TIMELESS
MP2 Cell Cycle - G1/S	UHRF1					MP2_G1S	DSN1
MP2 Cell Cycle - G1/S	MCM2					MP2_G1S	NCAPD2
MP3 Cell Cycle - HMG-rich	STMN1					MP3_HMG	NME1
MP3 Cell Cycle - HMG-rich	TUBA1B					MP3_HMG	STMN1
MP3 Cell Cycle - HMG-rich	H2AFZ					MP3_HMG	SNRPF
MP3 Cell Cycle - HMG-rich	DUT					MP3_HMG	CKS1B
MP3 Cell Cycle - HMG-rich	TUBB					MP3_HMG	H2AZ1
MP3 Cell Cycle - HMG-rich	PCNA					MP3_HMG	HMGB2
MP3 Cell Cycle - HMG-rich	HMGB2					MP3_HMG	HMGB1
MP3 Cell Cycle - HMG-rich	KIAA0101					MP3_HMG	CKS2
MP3 Cell Cycle - HMG-rich	HMGB1					MP3_HMG	PTMA
MP3 Cell Cycle - HMG-rich	RANBP1					MP3_HMG	DUT
MP3 Cell Cycle - HMG-rich	RAN					MP3_HMG	RAN
MP3 Cell Cycle - HMG-rich	TYMS					MP3_HMG	HMGN2
MP3 Cell Cycle - HMG-rich	H2AFV					MP3_HMG	TUBA1B
MP3 Cell Cycle - HMG-rich	SLC25A5					MP3_HMG	SET
MP3 Cell Cycle - HMG-rich	CKS1B					MP3_HMG	NPM1
MP3 Cell Cycle - HMG-rich	SNRPG					MP3_HMG	MARCKS
MP3 Cell Cycle - HMG-rich	COX8A					MP3_HMG	NASP
MP3 Cell Cycle - HMG-rich	HSPE1					MP3_HMG	ANP32E
MP3 Cell Cycle - HMG-rich	SNRPB					MP3_HMG	H2AC4
MP3 Cell Cycle - HMG-rich	ANAPC11					MP3_HMG	UBE2C
MP3 Cell Cycle - HMG-rich	SLIRP					MP3_HMG	HIST1H1B
MP3 Cell Cycle - HMG-rich	HMGN1					MP3_HMG	HMGB3
MP3 Cell Cycle - HMG-rich	NAA38					MP3_HMG	SMC4
MP3 Cell Cycle - HMG-rich	SNRPD1					MP3_HMG	TUBA1A
MP3 Cell Cycle - HMG-rich	SNRPE					MP3_HMG	GAPDH
MP3 Cell Cycle - HMG-rich	ATP5G3					MP3_HMG	TUBB
MP3 Cell Cycle - HMG-rich	HIST1H4C					MP3_HMG	TOP2A
MP3 Cell Cycle - HMG-rich	HSPD1					MP3_HMG	TUBB4B
MP3 Cell Cycle - HMG-rich	NME1					MP3_HMG	ANP32B
MP3 Cell Cycle - HMG-rich	TK1					MP3_HMG	NUCKS1
MP3 Cell Cycle - HMG-rich	HMGN2					MP3_HMG	LDHA
MP3 Cell Cycle - HMG-rich	MIF					MP3_HMG	SMC2
MP3 Cell Cycle - HMG-rich	SNRPF					MP3_HMG	PPIA
MP3 Cell Cycle - HMG-rich	ATP5G1					MP3_HMG	PABPC1
MP3 Cell Cycle - HMG-rich	TPI1					MP3_HMG	TPI1
MP3 Cell Cycle - HMG-rich	COX5A					MP3_HMG	ENO1
MP3 Cell Cycle - HMG-rich	ERH					MP3_HMG	PKM
MP3 Cell Cycle - HMG-rich	HMGA1					MP3_HMG	H2AFZ
MP3 Cell Cycle - HMG-rich	HNRNPA2B1					MP3_HMG	HMGA1
MP3 Cell Cycle - HMG-rich	MCM7					MP3_HMG	TPX2
MP3 Cell Cycle - HMG-rich	NUCB2					MP3_HMG	MARCKSL1
MP3 Cell Cycle - HMG-rich	SIVA1					MP3_HMG	BIRC5
MP3 Cell Cycle - HMG-rich	SRSF7					MP3_HMG	CDK1
MP3 Cell Cycle - HMG-rich	YBX1					MP3_HMG	NAP1L1
MP3 Cell Cycle - HMG-rich	LSM4					MP3_HMG	CBX3
MP3 Cell Cycle - HMG-rich	ANP32B					MP3_HMG	NUSAP1
MP3 Cell Cycle - HMG-rich	UQCRQ					MP3_HMG	SUB1
MP3 Cell Cycle - HMG-rich	HSPB11					MP3_HMG	CENPF
MP3 Cell Cycle - HMG-rich	SUMO2					MP3_HMG	RCC1
MP3 Cell Cycle - HMG-rich	SNRPD3					MP3_HMG	GNB2L1
MP4 Chromatin	MT-ND6					MP4_Chromatin	GOLGB1
MP4 Chromatin	DST					MP4_Chromatin	GOLGA4
MP4 Chromatin	SMARCA5					MP4_Chromatin	ATRX
MP4 Chromatin	SPEN					MP4_Chromatin	POLR2J3
MP4 Chromatin	PCM1					MP4_Chromatin	ZBTB7A
MP4 Chromatin	GOLGA4					MP4_Chromatin	SMARCA4
MP4 Chromatin	GOLGB1					MP4_Chromatin	CHD4
MP4 Chromatin	KCNQ1OT1					MP4_Chromatin	BCOR
MP4 Chromatin	PHF3					MP4_Chromatin	ARID1A
MP4 Chromatin	PTPN11					MP4_Chromatin	KMT2D
MP4 Chromatin	TRIM44					MP4_Chromatin	EP300
MP4 Chromatin	ZNF638					MP4_Chromatin	NCOR1
MP4 Chromatin	CEP350					MP4_Chromatin	CREBBP
MP4 Chromatin	GOLIM4					MP4_Chromatin	KMT2C
MP4 Chromatin	HIST1H1E					MP4_Chromatin	ASH1L
MP4 Chromatin	MSH6					MP4_Chromatin	TRRAP
MP4 Chromatin	ROCK2					MP4_Chromatin	BRCA2
MP4 Chromatin	SMC1A					MP4_Chromatin	HUWE1
MP4 Chromatin	SMCHD1					MP4_Chromatin	STAG2
MP4 Chromatin	ASH1L					MP4_Chromatin	MACF1
MP4 Chromatin	ATAD2					MP4_Chromatin	NIPBL
MP4 Chromatin	ATAD5					MP4_Chromatin	BPTF
MP4 Chromatin	BAZ1B					MP4_Chromatin	PDS5A
MP4 Chromatin	NOP14					MP4_Chromatin	SRCAP
MP4 Chromatin	RIF1					MP4_Chromatin	GOLGA3
MP4 Chromatin	SYNE2					MP4_Chromatin	SMC1A
MP4 Chromatin	TJP1					MP4_Chromatin	ZBTB20
MP4 Chromatin	TRIP11					MP4_Chromatin	USP34
MP4 Chromatin	ENAH					MP4_Chromatin	AHDC1
MP4 Chromatin	HIST1H1C					MP4_Chromatin	SETD2
MP4 Chromatin	HIST2H2AC					MP4_Chromatin	SYNE2
MP4 Chromatin	NRD1					MP4_Chromatin	SPEN
MP4 Chromatin	RANBP2					MP4_Chromatin	INO80
MP4 Chromatin	SMC5					MP4_Chromatin	VPS13C
MP4 Chromatin	ARGLU1					MP4_Chromatin	ASXL1
MP4 Chromatin	BDP1					MP4_Chromatin	PBRM1
MP4 Chromatin	SETD2					MP4_Chromatin	GOLGA2
MP4 Chromatin	SLK					MP4_Chromatin	EP400
MP4 Chromatin	SPAG9					MP4_Chromatin	MED13L
MP4 Chromatin	SUZ12					MP4_Chromatin	MYH9
MP4 Chromatin	AHCTF1					MP4_Chromatin	DYNC1H1
MP4 Chromatin	CLINT1					MP4_Chromatin	ATAD2
MP4 Chromatin	FAM208B					MP4_Chromatin	TRIO
MP4 Chromatin	KMT2A					MP4_Chromatin	KMT2A
MP4 Chromatin	MACF1					MP4_Chromatin	SPTBN1
MP4 Chromatin	PAXBP1					MP4_Chromatin	ZMYM2
MP4 Chromatin	HIST1H1B					MP4_Chromatin	PRRC2C
MP4 Chromatin	UACA					MP4_Chromatin	NSD1
MP4 Chromatin	SENP6					MP4_Chromatin	ZNF609
MP4 Chromatin	ZMYM4					MP4_Chromatin	NUMA1
MP5 Stress	ATF3					MP5_Stress-I	FOSB
MP5 Stress	EGR1					MP5_Stress-I	PPP1R15A
MP5 Stress	FOS					MP5_Stress-I	ATF3
MP5 Stress	PPP1R15A					MP5_Stress-I	EGR1
MP5 Stress	JUN					MP5_Stress-I	JUN
MP5 Stress	DUSP1					MP5_Stress-I	FOS
MP5 Stress	JUNB					MP5_Stress-I	NR4A1
MP5 Stress	FOSB					MP5_Stress-I	JUNB
MP5 Stress	IER2					MP5_Stress-I	GADD45B
MP5 Stress	GADD45B					MP5_Stress-I	ZFP36
MP5 Stress	BTG2					MP5_Stress-I	DNAJB1
MP5 Stress	ZFP36					MP5_Stress-I	DUSP1
MP5 Stress	DNAJB1					MP5_Stress-I	SOCS3
MP5 Stress	NR4A1					MP5_Stress-I	IER3
MP5 Stress	SERTAD1					MP5_Stress-I	KLF2
MP5 Stress	DDIT3					MP5_Stress-I	HSPA1A
MP5 Stress	KLF6					MP5_Stress-I	KLF4
MP5 Stress	NFKBIA					MP5_Stress-I	HSPA1B
MP5 Stress	HSPA1A					MP5_Stress-I	BTG2
MP5 Stress	HSPA1B					MP5_Stress-I	DNAJA1
MP5 Stress	CYR61					MP5_Stress-I	NR4A2
MP5 Stress	MAFF					MP5_Stress-I	IER2
MP5 Stress	NFKBIZ					MP5_Stress-I	GADD45G
MP5 Stress	IER3					MP5_Stress-I	HSP90AA1
MP5 Stress	CCNL1					MP5_Stress-I	IFRD1
MP5 Stress	MCL1					MP5_Stress-I	CXCL8
MP5 Stress	RHOB					MP5_Stress-I	BHLHE40
MP5 Stress	SOCS3					MP5_Stress-I	GEM
MP5 Stress	IRF1					MP5_Stress-I	NFKBIZ
MP5 Stress	CDKN1A					MP5_Stress-I	KLF6
MP5 Stress	HES1					MP5_Stress-I	MYC
MP5 Stress	ID2					MP5_Stress-I	EGR2
MP5 Stress	KLF4					MP5_Stress-I	CCL3L1
MP5 Stress	KLF10					MP5_Stress-I	NFKBID
MP5 Stress	CXCL2					MP5_Stress-I	HSPH1
MP5 Stress	ID1					MP5_Stress-I	UBC
MP5 Stress	TOB1					MP5_Stress-I	CYR61
MP5 Stress	TRIB1					MP5_Stress-I	CCN1
MP5 Stress	RASD1					MP5_Stress-I	DUSP2
MP5 Stress	SAT1					MP5_Stress-I	CCL3
MP5 Stress	DDIT4					MP5_Stress-I	PPP1R10
MP5 Stress	EGR2					MP5_Stress-I	BAG3
MP5 Stress	HERPUD1					MP5_Stress-I	RHOB
MP5 Stress	PLK2					MP5_Stress-I	JUND
MP5 Stress	DNAJA1					MP5_Stress-I	NFKBIA
MP5 Stress	HSPA6					MP5_Stress-I	DNAJB4
MP5 Stress	PMAIP1					MP5_Stress-I	TNFAIP3
MP5 Stress	CITED2					MP5_Stress-I	CTGF
MP5 Stress	ID3					MP5_Stress-I	CCN2
MP5 Stress	ID3					MP5_Stress-I	NAMPT
MP6 Hypoxia	NDRG1					MP6_Hypoxia	NDRG1
MP6 Hypoxia	BNIP3					MP6_Hypoxia	BNIP3
MP6 Hypoxia	SLC2A1					MP6_Hypoxia	P4HA1
MP6 Hypoxia	P4HA1					MP6_Hypoxia	VEGFA
MP6 Hypoxia	VEGFA					MP6_Hypoxia	FAM162A
MP6 Hypoxia	ENO2					MP6_Hypoxia	ADM
MP6 Hypoxia	ADM					MP6_Hypoxia	SLC2A1
MP6 Hypoxia	HILPDA					MP6_Hypoxia	AK4
MP6 Hypoxia	PGK1					MP6_Hypoxia	LDHA
MP6 Hypoxia	BNIP3L					MP6_Hypoxia	PGK1
MP6 Hypoxia	FAM162A					MP6_Hypoxia	HK2
MP6 Hypoxia	PLOD2					MP6_Hypoxia	PFKFB3
MP6 Hypoxia	EGLN3					MP6_Hypoxia	ENO1
MP6 Hypoxia	LDHA					MP6_Hypoxia	EGLN3
MP6 Hypoxia	MT1X					MP6_Hypoxia	GPI
MP6 Hypoxia	NRN1					MP6_Hypoxia	BNIP3L
MP6 Hypoxia	DDIT4					MP6_Hypoxia	TPI1
MP6 Hypoxia	ERO1A					MP6_Hypoxia	STC2
MP6 Hypoxia	ANGPTL4					MP6_Hypoxia	CA9
MP6 Hypoxia	IGFBP3					MP6_Hypoxia	ALDOA
MP6 Hypoxia	PFKP					MP6_Hypoxia	ERO1A
MP6 Hypoxia	INSIG2					MP6_Hypoxia	C10orf10
MP6 Hypoxia	NDUFA4L2					MP6_Hypoxia	PFKP
MP6 Hypoxia	PDK1					MP6_Hypoxia	PLIN2
MP6 Hypoxia	CA9					MP6_Hypoxia	DDIT4
MP6 Hypoxia	AKAP12					MP6_Hypoxia	ANKRD37
MP6 Hypoxia	C4ORF3					MP6_Hypoxia	MXI1
MP6 Hypoxia	IGFBP5					MP6_Hypoxia	PDK1
MP6 Hypoxia	GBE1					MP6_Hypoxia	GAPDH
MP6 Hypoxia	LGALS3					MP6_Hypoxia	PGAM1
MP6 Hypoxia	TMEM45A					MP6_Hypoxia	BHLHE40
MP6 Hypoxia	WSB1					MP6_Hypoxia	SLC16A3
MP6 Hypoxia	GPI					MP6_Hypoxia	ZFP36L2
MP6 Hypoxia	S100A10					MP6_Hypoxia	GYS1
MP6 Hypoxia	SLC16A3					MP6_Hypoxia	PKM
MP6 Hypoxia	EPB41L4A-AS1					MP6_Hypoxia	STC1
MP6 Hypoxia	ALDOA					MP6_Hypoxia	VLDLR
MP6 Hypoxia	ANKRD37					MP6_Hypoxia	KRT17
MP6 Hypoxia	CAV1					MP6_Hypoxia	KRT14
MP6 Hypoxia	AK4					MP6_Hypoxia	MIF
MP6 Hypoxia	DNAJB9					MP6_Hypoxia	LOX
MP6 Hypoxia	ERRFI1					MP6_Hypoxia	PFKL
MP6 Hypoxia	MT2A					MP6_Hypoxia	SLC2A3
MP6 Hypoxia	SLC3A2					MP6_Hypoxia	KRT19
MP6 Hypoxia	VIM					MP6_Hypoxia	JUN
MP6 Hypoxia	ENO1					MP6_Hypoxia	TFF3
MP6 Hypoxia	PFKFB3					MP6_Hypoxia	AURKAIP1
MP6 Hypoxia	HK2					MP6_Hypoxia	PPID
MP6 Hypoxia	CA12					MP6_Hypoxia	RNASE1
MP7 Stress (in vitro)	DDIT3					MP6_Hypoxia	ADORA2B
MP7 Stress (in vitro)	SLC3A2					MP7_Stress-II	TRIB3
MP7 Stress (in vitro)	TRIB3					MP7_Stress-II	SLC3A2
MP7 Stress (in vitro)	ASNS					MP7_Stress-II	HERPUD1
MP7 Stress (in vitro)	HERPUD1					MP7_Stress-II	SARS
MP7 Stress (in vitro)	PPP1R15A					MP7_Stress-II	ASNS
MP7 Stress (in vitro)	EPB41L4A-AS1					MP7_Stress-II	DDIT3
MP7 Stress (in vitro)	SNHG12					MP7_Stress-II	SLC7A5
MP7 Stress (in vitro)	GARS					MP7_Stress-II	STC2
MP7 Stress (in vitro)	GADD45A					MP7_Stress-II	ATF4
MP7 Stress (in vitro)	MTHFD2					MP7_Stress-II	GOT1
MP7 Stress (in vitro)	XBP1					MP7_Stress-II	CEBPB
MP7 Stress (in vitro)	CEBPG					MP7_Stress-II	GPT2
MP7 Stress (in vitro)	TAF1D					MP7_Stress-II	YARS
MP7 Stress (in vitro)	NUPR1					MP7_Stress-II	HYOU1
MP7 Stress (in vitro)	SARS					MP7_Stress-II	GARS
MP7 Stress (in vitro)	SNHG8					MP7_Stress-II	CARS
MP7 Stress (in vitro)	ZFAS1					MP7_Stress-II	NUPR1
MP7 Stress (in vitro)	PHGDH					MP7_Stress-II	EIF4EBP1
MP7 Stress (in vitro)	SHMT2					MP7_Stress-II	PHGDH
MP7 Stress (in vitro)	TXNIP					MP7_Stress-II	DDIT4
MP7 Stress (in vitro)	ATF4					MP7_Stress-II	HSPA5
MP7 Stress (in vitro)	HSPA5					MP7_Stress-II	XBP1
MP7 Stress (in vitro)	GDF15					MP7_Stress-II	PCK2
MP7 Stress (in vitro)	CARS					MP7_Stress-II	MTHFD2
MP7 Stress (in vitro)	MAP1LC3B					MP7_Stress-II	DNAJB11
MP7 Stress (in vitro)	SQSTM1					MP7_Stress-II	SLC1A5
MP7 Stress (in vitro)	YARS					MP7_Stress-II	EIF2S2
MP7 Stress (in vitro)	DNAJB9					MP7_Stress-II	PYCR1
MP7 Stress (in vitro)	PSAT1					MP7_Stress-II	WARS
MP7 Stress (in vitro)	GADD45B					MP7_Stress-II	MARS
MP7 Stress (in vitro)	ATF3					MP7_Stress-II	CHAC1
MP7 Stress (in vitro)	SNHG15					MP7_Stress-II	IARS
MP7 Stress (in vitro)	RSRC2					MP7_Stress-II	ATF3
MP7 Stress (in vitro)	CEBPB					MP7_Stress-II	DNAJB9
MP7 Stress (in vitro)	ARF4					MP7_Stress-II	PSAT1
MP7 Stress (in vitro)	EIF1B					MP7_Stress-II	ERP70
MP7 Stress (in vitro)	OSER1					MP7_Stress-II	ERO1A
MP7 Stress (in vitro)	BTG1					MP7_Stress-II	EPRRS
MP7 Stress (in vitro)	SNHG7					MP7_Stress-II	SDF2L1
MP7 Stress (in vitro)	WARS					MP7_Stress-II	GEMIN4
MP7 Stress (in vitro)	ZFAND2A					MP7_Stress-II	CALR
MP7 Stress (in vitro)	C6ORF48					MP7_Stress-II	GEMIN5
MP7 Stress (in vitro)	STC2					MP7_Stress-II	PDIA4
MP7 Stress (in vitro)	ZNF622					MP7_Stress-II	CANX
MP7 Stress (in vitro)	HSPA9					MP7_Stress-II	MANF
MP7 Stress (in vitro)	PDRG1					MP7_Stress-II	SESN2
MP7 Stress (in vitro)	UPP1					MP7_Stress-II	TARS
MP7 Stress (in vitro)	CCDC174					MP7_Stress-II	GEMIN2
MP8 Proteasomal degradation	PSMA3					MP7_Stress-II	HSP90B1
MP8 Proteasomal degradation	PSMC4					MP7_Stress-II	PDIA6
MP8 Proteasomal degradation	MDH1					MP8_Proteasomal	SLC25A5
MP8 Proteasomal degradation	PRDX1					MP8_Proteasomal	MDH2
MP8 Proteasomal degradation	PSMA4					MP8_Proteasomal	NDUFB5
MP8 Proteasomal degradation	PSMC2					MP8_Proteasomal	MRPL13
MP8 Proteasomal degradation	EIF4A3					MP8_Proteasomal	UQCR10
MP8 Proteasomal degradation	MRPL13					MP8_Proteasomal	NDUFA1
MP8 Proteasomal degradation	PSMB3					MP8_Proteasomal	NDUFB2
MP8 Proteasomal degradation	PSME2					MP8_Proteasomal	COX5B
MP8 Proteasomal degradation	CCT8					MP8_Proteasomal	COX6B1
MP8 Proteasomal degradation	ANXA1					MP8_Proteasomal	COX7B
MP8 Proteasomal degradation	DCAF13					MP8_Proteasomal	MRPS18B
MP8 Proteasomal degradation	PRMT1					MP8_Proteasomal	UQCRH
MP8 Proteasomal degradation	SSBP1					MP8_Proteasomal	NDUFA4
MP8 Proteasomal degradation	PSMB1					MP8_Proteasomal	UQCRQ
MP8 Proteasomal degradation	LAPTM4A					MP8_Proteasomal	COX7C
MP8 Proteasomal degradation	PSMB6					MP8_Proteasomal	PSMB3
MP8 Proteasomal degradation	CCT5					MP8_Proteasomal	PSMA7
MP8 Proteasomal degradation	NDUFS2					MP8_Proteasomal	COX7A2
MP8 Proteasomal degradation	PDHA1					MP8_Proteasomal	MRPL15
MP8 Proteasomal degradation	CCT7					MP8_Proteasomal	PSMB6
MP8 Proteasomal degradation	CDC123					MP8_Proteasomal	MRPS12
MP8 Proteasomal degradation	CCNB1					MP8_Proteasomal	NDUFS5
MP8 Proteasomal degradation	PCMT1					MP8_Proteasomal	PSMA1
MP8 Proteasomal degradation	POLR2G					MP8_Proteasomal	COX4I1
MP8 Proteasomal degradation	HSPA5					MP8_Proteasomal	NDUFA6
MP8 Proteasomal degradation	XRCC6					MP8_Proteasomal	PSMB4
MP8 Proteasomal degradation	NDUFA9					MP8_Proteasomal	PSMD14
MP8 Proteasomal degradation	DPM1					MP8_Proteasomal	ATP5L
MP8 Proteasomal degradation	SSB					MP8_Proteasomal	PSMB2
MP8 Proteasomal degradation	EIF3I					MP8_Proteasomal	ATP5G1
MP8 Proteasomal degradation	MCTS1					MP8_Proteasomal	PSMA2
MP8 Proteasomal degradation	SLC3A2					MP8_Proteasomal	NDUFB10
MP8 Proteasomal degradation	ECH1					MP8_Proteasomal	COX8A
MP8 Proteasomal degradation	PSMD13					MP8_Proteasomal	UQCRB
MP8 Proteasomal degradation	TUBB4B					MP8_Proteasomal	PSMD7
MP8 Proteasomal degradation	SNRPB2					MP8_Proteasomal	NDUFB3
MP8 Proteasomal degradation	DDX39A					MP8_Proteasomal	COX6C
MP8 Proteasomal degradation	NQO1					MP8_Proteasomal	PSMA3
MP8 Proteasomal degradation	EIF4A1					MP8_Proteasomal	NDUFA13
MP8 Proteasomal degradation	SPCS2					MP8_Proteasomal	ATP5J2
MP8 Proteasomal degradation	IMPDH2					MP8_Proteasomal	PSMA5
MP8 Proteasomal degradation	RTCB					MP8_Proteasomal	COX5A
MP8 Proteasomal degradation	GSTO1					MP8_Proteasomal	ATP5E
MP8 Proteasomal degradation	PDIA3					MP8_Proteasomal	PSMA4
MP8 Proteasomal degradation	PRDX2					MP8_Proteasomal	PSMC5
MP8 Proteasomal degradation	NUP37					MP8_Proteasomal	PSMD11
MP8 Proteasomal degradation	ILF2					MP8_Proteasomal	ATP5G3
MP9 Unfolded protein response	PDIA3					MP8_Proteasomal	NDUFA2
MP9 Unfolded protein response	MANF					MP8_Proteasomal	NDUFB1
MP9 Unfolded protein response	PDIA4					MP8_Proteasomal	PSMD8
MP9 Unfolded protein response	CRELD2					MP9_Neural-like	MALAT1
MP9 Unfolded protein response	HSPA5					MP9_Neural-like	NEAT1
MP9 Unfolded protein response	SDF2L1					MP9_Neural-like	N4BP2L2
MP9 Unfolded protein response	CALR					MP9_Neural-like	PNISR
MP9 Unfolded protein response	MYDGF					MP9_Neural-like	KIAA1217
MP9 Unfolded protein response	TMED9					MP9_Neural-like	BCAS3
MP9 Unfolded protein response	ARF4					MP9_Neural-like	ZNF609
MP9 Unfolded protein response	DNAJB9					MP9_Neural-like	SOX4
MP9 Unfolded protein response	SELENOK					MP9_Neural-like	CDH2
MP9 Unfolded protein response	SELENOS					MP9_Neural-like	SON
MP9 Unfolded protein response	CDK2AP2					MP9_Neural-like	LINC00461
MP9 Unfolded protein response	DNAJC3					MP9_Neural-like	NRXN3
MP9 Unfolded protein response	DNAJB11					MP9_Neural-like	TCF12
MP9 Unfolded protein response	ERLEC1					MP9_Neural-like	MAP1B
MP9 Unfolded protein response	FKBP11					MP9_Neural-like	MEIS2
MP9 Unfolded protein response	HYOU1					MP9_Neural-like	SNHG14
MP9 Unfolded protein response	PDIA6					MP9_Neural-like	ANK3
MP9 Unfolded protein response	SEC61G					MP9_Neural-like	MIAT
MP9 Unfolded protein response	HERPUD1					MP9_Neural-like	NCKAP5
MP9 Unfolded protein response	HSP90B1					MP9_Neural-like	CADPS
MP9 Unfolded protein response	HSP90B2P					MP9_Neural-like	PTPRD
MP9 Unfolded protein response	OSTC					MP9_Neural-like	DYNC1H1
MP9 Unfolded protein response	CCPG1					MP9_Neural-like	STXBP5
MP9 Unfolded protein response	ISG20					MP9_Neural-like	CPE
MP9 Unfolded protein response	KDELR2					MP9_Neural-like	LRRC4C
MP9 Unfolded protein response	PLPP5					MP9_Neural-like	DPP10
MP9 Unfolded protein response	PPIB					MP9_Neural-like	MARCKS
MP9 Unfolded protein response	RRBP1					MP9_Neural-like	MACF1
MP9 Unfolded protein response	SLC35B1					MP9_Neural-like	DLG2
MP9 Unfolded protein response	PRDX4					MP9_Neural-like	NAV3
MP9 Unfolded protein response	RPN2					MP9_Neural-like	BPTF
MP9 Unfolded protein response	SRPRB					MP9_Neural-like	PBX1
MP9 Unfolded protein response	AC068631.2					MP9_Neural-like	PRRC2C
MP9 Unfolded protein response	FKBP2					MP9_Neural-like	STMN2
MP9 Unfolded protein response	HM13					MP9_Neural-like	MLLT3
MP9 Unfolded protein response	LMAN1					MP9_Neural-like	AHDC1
MP9 Unfolded protein response	LMAN2					MP9_Neural-like	HUWE1
MP9 Unfolded protein response	SEL1L					MP9_Neural-like	RBFOX1
MP9 Unfolded protein response	SRPRA					MP9_Neural-like	CELF2
MP9 Unfolded protein response	AC012181.2					MP9_Neural-like	ZBTB20
MP9 Unfolded protein response	CKAP4					MP9_Neural-like	MYO10
MP9 Unfolded protein response	MLEC					MP9_Neural-like	LMO4
MP9 Unfolded protein response	SEC63					MP9_Neural-like	KMT2C
MP9 Unfolded protein response	SLC3A2					MP9_Neural-like	GOLGB1
MP9 Unfolded protein response	TXNDC15					MP9_Neural-like	MAPK8IP1
MP9 Unfolded protein response	ATF4					MP9_Neural-like	NAV2
MP9 Unfolded protein response	LAPTM4A					MP9_Neural-like	NCALD
MP10 Protein maturation	RPN2					MP9_Neural-like	VAMP2
MP10 Protein maturation	PDIA3					MP9_Neural-like	PTBP2
MP10 Protein maturation	ATP6AP2					MP9_Neural-like	HNRNPK
MP10 Protein maturation	HSPA5					MP10_EMT	ANXA1
MP10 Protein maturation	PDIA6					MP10_EMT	LGALS1
MP10 Protein maturation	LGALS3BP					MP10_EMT	FN1
MP10 Protein maturation	GRN					MP10_EMT	TNFRSF12A
MP10 Protein maturation	LAPTM4A					MP10_EMT	CD44
MP10 Protein maturation	HSP90B1					MP10_EMT	S100A11
MP10 Protein maturation	LAMP1					MP10_EMT	TAGLN2
MP10 Protein maturation	TMEM59					MP10_EMT	CALD1
MP10 Protein maturation	EPCAM					MP10_EMT	VIM
MP10 Protein maturation	GDF15					MP10_EMT	ANXA2
MP10 Protein maturation	HLA-C					MP10_EMT	SERPINE1
MP10 Protein maturation	OS9					MP10_EMT	NAMPT
MP10 Protein maturation	APLP2					MP10_EMT	ACTN1
MP10 Protein maturation	AZGP1					MP10_EMT	TMSB4X
MP10 Protein maturation	CLU					MP10_EMT	FTH1
MP10 Protein maturation	CTSA					MP10_EMT	CAV1
MP10 Protein maturation	DDOST					MP10_EMT	ACTG1
MP10 Protein maturation	HLA-A					MP10_EMT	MYH9
MP10 Protein maturation	ITM2B					MP10_EMT	FLNA
MP10 Protein maturation	LRPAP1					MP10_EMT	CLU
MP10 Protein maturation	NEAT1					MP10_EMT	EMP1
MP10 Protein maturation	PSAP					MP10_EMT	COL1A1
MP10 Protein maturation	SIL1					MP10_EMT	IGFBP7
MP10 Protein maturation	SLC3A2					MP10_EMT	FOS
MP10 Protein maturation	TIMP1					MP10_EMT	B2M
MP10 Protein maturation	APMAP					MP10_EMT	LDHA
MP10 Protein maturation	APP					MP10_EMT	GAPDH
MP10 Protein maturation	CTSL					MP10_EMT	LAMC2
MP10 Protein maturation	LAMP2					MP10_EMT	COL3A1
MP10 Protein maturation	LMAN2					MP10_EMT	COL1A2
MP10 Protein maturation	SERPINA1					MP10_EMT	TIMP1
MP10 Protein maturation	PIGT					MP10_EMT	DCN
MP10 Protein maturation	PRDX4					MP10_EMT	ENO1
MP10 Protein maturation	SERPINE2					MP10_EMT	PABPC1
MP10 Protein maturation	TM9SF2					MP10_EMT	PKM
MP10 Protein maturation	TSPAN1					MP10_EMT	SPARC
MP10 Protein maturation	ATP6AP1					MP10_EMT	SLC2A1
MP10 Protein maturation	CFI					MP10_EMT	HSP90AB1
MP10 Protein maturation	EPHX1					MP10_EMT	BGN
MP10 Protein maturation	EPRS					MP10_EMT	COL5A1
MP10 Protein maturation	GGH					MP10_EMT	GNB2L1
MP10 Protein maturation	HEXB					MP10_EMT	S100A10
MP10 Protein maturation	MALAT1					MP10_EMT	EGR1
MP10 Protein maturation	PPIB					MP10_EMT	CTGF
MP10 Protein maturation	SPP1					MP10_EMT	CCN2
MP10 Protein maturation	SERPINA1					MP10_EMT	SQSTM1
MP11 Translation initiation	EPB41L4A-AS1					MP10_EMT	TPM4
MP11 Translation initiation	IMPDH2					MP10_EMT	MIF
MP11 Translation initiation	AHCY					MP10_EMT	S100A6
MP11 Translation initiation	NOB1					MP10_EMT	KRT14
MP11 Translation initiation	OXA1L					MP11_IFN-MHC	HLA-B
MP11 Translation initiation	EIF2A					MP11_IFN-MHC	HLA-C
MP11 Translation initiation	IGBP1					MP11_IFN-MHC	IFI6
MP11 Translation initiation	LETMD1					MP11_IFN-MHC	PLAAT4
MP11 Translation initiation	RPL22L1					MP11_IFN-MHC	ISG15
MP11 Translation initiation	SNHG7					MP11_IFN-MHC	HLA-A
MP11 Translation initiation	SNHG8					MP11_IFN-MHC	B2M
MP11 Translation initiation	ZNF581					MP11_IFN-MHC	IFITM3
MP11 Translation initiation	APEX1					MP11_IFN-MHC	IFI27
MP11 Translation initiation	C19ORF48					MP11_IFN-MHC	BST2
MP11 Translation initiation	EIF3M					MP11_IFN-MHC	IFIT3
MP11 Translation initiation	HIST3H2A					MP11_IFN-MHC	MX1
MP11 Translation initiation	LTA4H					MP11_IFN-MHC	HLA-E
MP11 Translation initiation	MYC					MP11_IFN-MHC	IFIT1
MP11 Translation initiation	SNHG19					MP11_IFN-MHC	IRF7
MP11 Translation initiation	C11ORF1					MP11_IFN-MHC	PSMB9
MP11 Translation initiation	C6ORF48					MP11_IFN-MHC	TAP1
MP11 Translation initiation	CCDC85B					MP11_IFN-MHC	STAT1
MP11 Translation initiation	CCNG1					MP11_IFN-MHC	OAS1
MP11 Translation initiation	EIF2S3					MP11_IFN-MHC	OASL
MP11 Translation initiation	EIF3D					MP11_IFN-MHC	IFITM2
MP11 Translation initiation	EIF3F					MP11_IFN-MHC	SAMD9L
MP11 Translation initiation	EIF3M					MP11_IFN-MHC	XAF1
MP11 Translation initiation	ABHD14B					MP11_IFN-MHC	OAS2
MP11 Translation initiation	EIF4B					MP11_IFN-MHC	ZNFX1
MP11 Translation initiation	LYRM4					MP11_IFN-MHC	RSAD2
MP11 Translation initiation	PPP1R14B					MP11_IFN-MHC	SP100
MP11 Translation initiation	QARS					MP11_IFN-MHC	UBA7
MP11 Translation initiation	RSL1D1					MP11_IFN-MHC	HLA-F
MP11 Translation initiation	SLC27A5					MP11_IFN-MHC	GBP1
MP11 Translation initiation	SRM					MP11_IFN-MHC	SAMD9
MP11 Translation initiation	NME1					MP11_IFN-MHC	CMPK2
MP11 Translation initiation	NBEAL1					MP11_IFN-MHC	RTP4
MP11 Translation initiation	EIF3E					MP11_IFN-MHC	HERC5
MP11 Translation initiation	CCNB1IP1					MP11_IFN-MHC	PML
MP11 Translation initiation	MRPL10					MP11_IFN-MHC	EPSTI1
MP11 Translation initiation	HSD17B11					MP11_IFN-MHC	OAS3
MP11 Translation initiation	TOP1MT					MP11_IFN-MHC	STAT2
MP11 Translation initiation	NOA1					MP11_IFN-MHC	IRF1
MP11 Translation initiation	FBL					MP11_IFN-MHC	IFIT2
MP11 Translation initiation	MRPL45					MP11_IFN-MHC	IFI35
MP11 Translation initiation	ZNF277					MP11_IFN-MHC	PSMB8
MP11 Translation initiation	PAICS					MP11_IFN-MHC	IFI44L
MP11 Translation initiation	EXOSC5					MP11_IFN-MHC	HELZ2
MP11 Translation initiation	ZFAS1					MP11_IFN-MHC	IFIH1
MP12 EMT-I	COL1A2					MP11_IFN-MHC	PLSCR1
MP12 EMT-I	SPARC					MP11_IFN-MHC	ADAR
MP12 EMT-I	COL1A1					MP11_IFN-MHC	TRIM22
MP12 EMT-I	COL3A1					MP11_IFN-MHC	DDX58
MP12 EMT-I	IGFBP7					MP11_IFN-MHC	EIF2AK2
MP12 EMT-I	TAGLN					MP12_MYC	NME1
MP12 EMT-I	C1S					MP12_MYC	PRMT1
MP12 EMT-I	FN1					MP12_MYC	TIMM13
MP12 EMT-I	MGP					MP12_MYC	MRPL12
MP12 EMT-I	TIMP1					MP12_MYC	MIF
MP12 EMT-I	TIMP3					MP12_MYC	DUT
MP12 EMT-I	BGN					MP12_MYC	LDHA
MP12 EMT-I	C1R					MP12_MYC	NPM1
MP12 EMT-I	VIM					MP12_MYC	GAPDH
MP12 EMT-I	COL6A2					MP12_MYC	SRSF1
MP12 EMT-I	COL4A2					MP12_MYC	RAN
MP12 EMT-I	COL6A1					MP12_MYC	SLC25A5
MP12 EMT-I	MMP2					MP12_MYC	PPIA
MP12 EMT-I	DCN					MP12_MYC	PTMA
MP12 EMT-I	COL4A1					MP12_MYC	HNRNPU
MP12 EMT-I	FSTL1					MP12_MYC	EIF4A1
MP12 EMT-I	NNMT					MP12_MYC	TPI1
MP12 EMT-I	TPM1					MP12_MYC	ENO1
MP12 EMT-I	TSC22D3					MP12_MYC	HNRNPA1
MP12 EMT-I	CCDC80					MP12_MYC	EIF4H
MP12 EMT-I	CTGF					MP12_MYC	SNRPD1
MP12 EMT-I	CXCL12					MP12_MYC	PKM
MP12 EMT-I	LUM					MP12_MYC	MRPL13
MP12 EMT-I	MYL9					MP12_MYC	SLC25A3
MP12 EMT-I	PRSS23					MP12_MYC	SF3B1
MP12 EMT-I	TGFBI					MP12_MYC	HNRNPL
MP12 EMT-I	TPM2					MP12_MYC	PHB
MP12 EMT-I	CAV1					MP12_MYC	PFN1
MP12 EMT-I	CYR61					MP12_MYC	STMN1
MP12 EMT-I	IGFBP5					MP12_MYC	MYC
MP12 EMT-I	LGALS1					MP12_MYC	HNRNPK
MP12 EMT-I	SPARCL1					MP12_MYC	SET
MP12 EMT-I	A2M					MP12_MYC	DDX21
MP12 EMT-I	ACTA2					MP12_MYC	POLR2L
MP12 EMT-I	CALD1					MP12_MYC	SNRPB
MP12 EMT-I	COL6A3					MP12_MYC	UQCR10
MP12 EMT-I	CTSK					MP12_MYC	HNRNPC
MP12 EMT-I	FBLN1					MP12_MYC	SFPQ
MP12 EMT-I	IGFBP4					MP12_MYC	NAP1L1
MP12 EMT-I	POSTN					MP12_MYC	MRPS18B
MP12 EMT-I	RARRES2					MP12_MYC	HSPA8
MP12 EMT-I	SERPING1					MP12_MYC	HNRNPA2B1
MP12 EMT-I	SNAI2					MP12_MYC	DDX1
MP12 EMT-I	TCF4					MP12_MYC	VDAC1
MP13 EMT-II	LAMC2					MP12_MYC	PABPC1
MP13 EMT-II	LAMB3					MP12_MYC	PGK1
MP13 EMT-II	LAMA3					MP12_MYC	SF3A3
MP13 EMT-II	EMP3					MP12_MYC	GPI
MP13 EMT-II	TGFBI					MP12_MYC	EIF3H
MP13 EMT-II	TNFRSF12A					MP12_MYC	WDR12
MP13 EMT-II	FLNA					MP13_Respiration	NDUFB3
MP13 EMT-II	PLAU					MP13_Respiration	NME1
MP13 EMT-II	PMEPA1					MP13_Respiration	PSMB3
MP13 EMT-II	CAV1					MP13_Respiration	MIF
MP13 EMT-II	KRT17					MP13_Respiration	COX6B1
MP13 EMT-II	PRSS23					MP13_Respiration	NDUFA4
MP13 EMT-II	LGALS1					MP13_Respiration	COX7C
MP13 EMT-II	VIM					MP13_Respiration	SLC25A5
MP13 EMT-II	S100A2					MP13_Respiration	GAPDH
MP13 EMT-II	COL17A1					MP13_Respiration	ATP5G1
MP13 EMT-II	FSTL3					MP13_Respiration	MDH2
MP13 EMT-II	CST6					MP13_Respiration	NDUFA1
MP13 EMT-II	IL32					MP13_Respiration	NDUFB5
MP13 EMT-II	PDLIM7					MP13_Respiration	COX5B
MP13 EMT-II	SERPINE1					MP13_Respiration	NDUFB2
MP13 EMT-II	ANXA3					MP13_Respiration	COX7B
MP13 EMT-II	IGFA3					MP13_Respiration	MRPL13
MP13 EMT-II	DCBLD2					MP13_Respiration	UQCR10
MP13 EMT-II	F3					MP13_Respiration	COX7A2
MP13 EMT-II	MT2A					MP13_Respiration	LDHA
MP13 EMT-II	ITGB6					MP13_Respiration	UQCRH
MP13 EMT-II	KRT7					MP13_Respiration	TPI1
MP13 EMT-II	PLAUR					MP13_Respiration	UQCRQ
MP13 EMT-II	PRKCDBP					MP13_Respiration	ENO1
MP13 EMT-II	SERPINE2					MP13_Respiration	NDUFS5
MP13 EMT-II	ITGB1					MP13_Respiration	ATP5L
MP13 EMT-II	RBP1					MP13_Respiration	PSMA7
MP13 EMT-II	ITGA3					MP13_Respiration	COX4I1
MP13 EMT-II	CDKN1A					MP13_Respiration	NDUFA6
MP13 EMT-II	THBS1					MP13_Respiration	ATP5G3
MP13 EMT-II	FN1					MP13_Respiration	NDUFB10
MP13 EMT-II	MMP7					MP13_Respiration	COX8A
MP13 EMT-II	RHOD					MP13_Respiration	UQCRB
MP13 EMT-II	INHBA					MP13_Respiration	PSMB6
MP13 EMT-II	ITGAV					MP13_Respiration	NDUFA2
MP14 EMT-III	ANXA2					MP13_Respiration	NDUFA13
MP14 EMT-III	KRT19					MP13_Respiration	PSMA1
MP14 EMT-III	S100A6					MP13_Respiration	COX6C
MP14 EMT-III	TNFRSF12A					MP13_Respiration	ATP5J2
MP14 EMT-III	KRT7					MP13_Respiration	PKM
MP14 EMT-III	LGALS1					MP13_Respiration	COX5A
MP14 EMT-III	ANXA1					MP13_Respiration	PPIA
MP14 EMT-III	TM4SF1					MP13_Respiration	ATP5E
MP14 EMT-III	S100A10					MP13_Respiration	NDUFB1
MP14 EMT-III	LGALS3					MP13_Respiration	NDUFA11
MP14 EMT-III	S100A16					MP13_Respiration	NDUFS6
MP14 EMT-III	TAGLN2					MP13_Respiration	COX6A1
MP14 EMT-III	LMNA					MP13_Respiration	PSMB2
MP14 EMT-III	CRIP1					MP13_Respiration	NDUFS4
MP14 EMT-III	EZR					MP13_Respiration	CHCHD2
MP14 EMT-III	KRT18					MP14_Secreted	FOSB
MP14 EMT-III	S100A11					MP14_Secreted	TRIB1
MP14 EMT-III	S100A4					MP14_Secreted	SOD2
MP14 EMT-III	EMP3					MP14_Secreted	EGR1
MP14 EMT-III	HSPB11					MP14_Secreted	DUSP1
MP14 EMT-III	KRT8					MP14_Secreted	ATF3
MP14 EMT-III	TUBA1A					MP14_Secreted	PPP1R15A
MP14 EMT-III	VIM					MP14_Secreted	GADD45B
MP14 EMT-III	IL32					MP14_Secreted	JUNB
MP14 EMT-III	C1R					MP14_Secreted	CXCL8
MP14 EMT-III	KLF6					MP14_Secreted	FOS
MP14 EMT-III	ANXA3					MP14_Secreted	ZFP36
MP14 EMT-III	SH3BGRL3					MP14_Secreted	CCL3L1
MP14 EMT-III	TMSB4X					MP14_Secreted	DNAJB1
MP14 EMT-III	C19ORF33					MP14_Secreted	IER3
MP14 EMT-III	CKB					MP14_Secreted	KLF2
MP14 EMT-III	CLIC1					MP14_Secreted	JUN
MP14 EMT-III	EMP1					MP14_Secreted	SOCS3
MP14 EMT-III	IFI27					MP14_Secreted	IFRD1
MP14 EMT-III	ISG15					MP14_Secreted	NR4A1
MP14 EMT-III	MDK					MP14_Secreted	CCL3
MP14 EMT-III	MMP7					MP14_Secreted	NFKBIZ
MP14 EMT-III	PHLDA2					MP14_Secreted	BTG2
MP14 EMT-III	PLP2					MP14_Secreted	CYR61
MP14 EMT-III	CLDN4					MP14_Secreted	CCN1
MP14 EMT-III	MYADM					MP14_Secreted	CCL4
MP14 EMT-III	RHOC					MP14_Secreted	BHLHE40
MP14 EMT-III	S100A14					MP14_Secreted	DNAJA1
MP14 EMT-III	TP53AIP1					MP14_Secreted	HSPA1A
MP14 EMT-III	CRIP2					MP14_Secreted	EGR2
MP14 EMT-III	MYL12A					MP14_Secreted	KLF4
MP14 EMT-III	RAB11FIP1					MP14_Secreted	CCL4L2
MP14 EMT-III	S100P					MP14_Secreted	IER2
MP14 EMT-III	STMN1					MP14_Secreted	HSPA1B
MP14 EMT-III	FXYD3					MP14_Secreted	NFKBID
MP15 EMT IV	KRT15					MP14_Secreted	GADD45G
MP15 EMT IV	CXCL14					MP14_Secreted	GEM
MP15 EMT IV	DAPL1					MP14_Secreted	DUSP2
MP15 EMT IV	ALDH3A1					MP14_Secreted	UBC
MP15 EMT IV	DST					MP14_Secreted	TNFAIP3
MP15 EMT IV	CCL2					MP14_Secreted	NFKBIA
MP15 EMT IV	TXNIP					MP14_Secreted	NR4A2
MP15 EMT IV	C12ORF75					MP14_Secreted	KLF6
MP15 EMT IV	COL17A1					MP14_Secreted	CXCL1
MP15 EMT IV	DCN					MP14_Secreted	RHOB
MP15 EMT IV	HOPX					MP14_Secreted	CXCL2
MP15 EMT IV	MOXD1					MP14_Secreted	NAMPT
MP15 EMT IV	SDCBP					MP14_Secreted	IL6
MP15 EMT IV	SEPP1					MP14_Secreted	MYC
MP15 EMT IV	THBS2					MP14_Secreted	CSF2
MP15 EMT IV	TIMP1					MP15_Cilia	CFAP126
MP15 EMT IV	ASS1					MP15_Cilia	C5orf49
MP15 EMT IV	GLUL					MP15_Cilia	TPPP3
MP15 EMT IV	NFIB					MP15_Cilia	CAPS
MP15 EMT IV	NTRK2					MP15_Cilia	FAM183A
MP15 EMT IV	SERPINH1					MP15_Cilia	FAM216B
MP15 EMT IV	SOX4					MP15_Cilia	C1orf192
MP15 EMT IV	ANTXR1					MP15_Cilia	EFHC1
MP15 EMT IV	C1R					MP15_Cilia	LRRIQ1
MP15 EMT IV	C1S					MP15_Cilia	C9orf116
MP15 EMT IV	C6ORF48					MP15_Cilia	CCDC153
MP15 EMT IV	CAV1					MP15_Cilia	CCDC113
MP15 EMT IV	FTH1					MP15_Cilia	PIFO
MP15 EMT IV	IGFBP5					MP15_Cilia	C20orf85
MP15 EMT IV	NCOA7					MP15_Cilia	RSPH1
MP15 EMT IV	NINJ1					MP15_Cilia	C11orf88
MP15 EMT IV	PNRC1					MP15_Cilia	DYNLRB2
MP15 EMT IV	SERPINE2					MP15_Cilia	SPAG6
MP15 EMT IV	SERPINF1					MP15_Cilia	RSPH4A
MP15 EMT IV	SLC47A2					MP15_Cilia	CCDC146
MP15 EMT IV	SNAI2					MP15_Cilia	C7orf57
MP15 EMT IV	SOCS3					MP15_Cilia	CFAP54
MP15 EMT IV	SPARC					MP15_Cilia	C9orf24
MP15 EMT IV	TSC22D1					MP15_Cilia	C1orf189
MP15 EMT IV	ASPN					MP15_Cilia	IQCG
MP15 EMT IV	LTF					MP15_Cilia	WDR92
MP15 EMT IV	SFRP1					MP15_Cilia	DNAH12
MP15 EMT IV	TP53AIP1					MP15_Cilia	ODF2
MP15 EMT IV	CD74					MP15_Cilia	AK7
MP15 EMT IV	EGR1					MP15_Cilia	DNALI1
MP15 EMT IV	BCAM					MP15_Cilia	C6orf165
MP15 EMT IV	SESN3					MP15_Cilia	DYNC2H1
MP15 EMT IV	IFITM1					MP15_Cilia	DNAI2
MP15 EMT IV	HTRA1					MP15_Cilia	LRRC71
MP15 EMT IV	IFIT3					MP15_Cilia	NME5
MP16 MES (glioma)	EMP1					MP15_Cilia	IFT140
MP16 MES (glioma)	GAP43					MP15_Cilia	C11orf97
MP16 MES (glioma)	TNFRSF12A					MP15_Cilia	C3orf58
MP16 MES (glioma)	CD44					MP15_Cilia	ENKUR
MP16 MES (glioma)	TNC					MP15_Cilia	DYX1C1
MP16 MES (glioma)	LYST					MP15_Cilia	CCDC39
MP16 MES (glioma)	PLAT					MP15_Cilia	DNAAF1
MP16 MES (glioma)	WWTR1					MP15_Cilia	TMEM190
MP16 MES (glioma)	ANXA2					MP15_Cilia	FAM166B
MP16 MES (glioma)	GADD45A					MP15_Cilia	IFT81
MP16 MES (glioma)	LMNA					MP15_Cilia	DNAH9
MP16 MES (glioma)	VMP1					MP15_Cilia	C2orf71
MP16 MES (glioma)	IGFBP3					MP15_Cilia	SPEF1
MP16 MES (glioma)	SCG2					MP15_Cilia	DNAH5
MP16 MES (glioma)	HIVEP3					MP15_Cilia	ARMC3
MP16 MES (glioma)	METTL7B					MP16_Epi-I	CEACAM6
MP16 MES (glioma)	RCAN1					MP16_Epi-I	SCD
MP16 MES (glioma)	ZYX					MP16_Epi-I	DHCR24
MP16 MES (glioma)	CAMK2D					MP16_Epi-I	MUC5B
MP16 MES (glioma)	IL1RAP					MP16_Epi-I	S100P
MP16 MES (glioma)	JAG1					MP16_Epi-I	KRT19
MP16 MES (glioma)	NAMPT					MP16_Epi-I	MUC5AC
MP16 MES (glioma)	PGM2L1					MP16_Epi-I	TFF1
MP16 MES (glioma)	VIM					MP16_Epi-I	AGR2
MP16 MES (glioma)	ACTN1					MP16_Epi-I	PABPC1
MP16 MES (glioma)	AKAP12					MP16_Epi-I	TFF3
MP16 MES (glioma)	IGF2BP2					MP16_Epi-I	MSLN
MP16 MES (glioma)	MIR4435-2HG					MP16_Epi-I	LGALS3
MP16 MES (glioma)	NRP2					MP16_Epi-I	KRT18
MP16 MES (glioma)	PDLIM4					MP16_Epi-I	CD24
MP16 MES (glioma)	ANXA1					MP16_Epi-I	LDHA
MP16 MES (glioma)	BCAT1					MP16_Epi-I	CLDN4
MP16 MES (glioma)	CLIC4					MP16_Epi-I	AGR3
MP16 MES (glioma)	CREB5					MP16_Epi-I	KRT8
MP16 MES (glioma)	DIRAS3					MP16_Epi-I	LCN2
MP16 MES (glioma)	EGR1					MP16_Epi-I	TACSTD2
MP16 MES (glioma)	ELL2					MP16_Epi-I	WFDC2
MP16 MES (glioma)	F3					MP16_Epi-I	H2AZ1
MP16 MES (glioma)	FRMD5					MP16_Epi-I	CXCL17
MP16 MES (glioma)	IGFBP7					MP16_Epi-I	GAPDH
MP16 MES (glioma)	LINC00152					MP16_Epi-I	CLDN7
MP16 MES (glioma)	S100A16					MP16_Epi-I	UPK1B
MP16 MES (glioma)	VCL					MP16_Epi-I	PI3
MP16 MES (glioma)	SAMD4A					MP16_Epi-I	GPX2
MP16 MES (glioma)	ADAMTS9-AS2					MP16_Epi-I	SCGB3A1
MP16 MES (glioma)	SLC4A7					MP16_Epi-I	FXYD3
MP16 MES (glioma)	GFAP					MP16_Epi-I	GNB2L1
MP16 MES (glioma)	CADPS					MP16_Epi-I	CKS2
MP16 MES (glioma)	GNG12					MP16_Epi-I	SPINK1
MP16 MES (glioma)	KLHL4					MP16_Epi-I	PTMA
MP17 Interferon/MHC-II (I)	ISG15					MP16_Epi-I	S100A14
MP17 Interferon/MHC-II (I)	CD74					MP16_Epi-I	CDH1
MP17 Interferon/MHC-II (I)	IFI6					MP16_Epi-I	CLDN3
MP17 Interferon/MHC-II (I)	HLA-DRA					MP16_Epi-I	SERPINB3
MP17 Interferon/MHC-II (I)	HLA-DRB1					MP16_Epi-I	AKR1C1
MP17 Interferon/MHC-II (I)	IFIT3					MP16_Epi-I	KRT7
MP17 Interferon/MHC-II (I)	PSMB9					MP16_Epi-I	MUC1
MP17 Interferon/MHC-II (I)	IFI44L					MP16_Epi-I	SLPI
MP17 Interferon/MHC-II (I)	RARRES3					MP16_Epi-I	S100A16
MP17 Interferon/MHC-II (I)	STAT1					MP16_Epi-I	TPI1
MP17 Interferon/MHC-II (I)	HLA-DPA1					MP16_Epi-I	PKM
MP17 Interferon/MHC-II (I)	MX1					MP16_Epi-I	EPCAM
MP17 Interferon/MHC-II (I)	UBE2L6					MP16_Epi-I	CEACAM5
MP17 Interferon/MHC-II (I)	IFITM3					MP16_Epi-I	ENO1
MP17 Interferon/MHC-II (I)	BST2					MP16_Epi-I	ANXA1
MP17 Interferon/MHC-II (I)	OAS1					MP17_Epi-II	FABP1
MP17 Interferon/MHC-II (I)	GBP1					MP17_Epi-II	FXYD3
MP17 Interferon/MHC-II (I)	IFI27					MP17_Epi-II	CES2
MP17 Interferon/MHC-II (I)	IFIT1					MP17_Epi-II	TFF1
MP17 Interferon/MHC-II (I)	TAP1					MP17_Epi-II	MUC5AC
MP17 Interferon/MHC-II (I)	HLA-B					MP17_Epi-II	AGR2
MP17 Interferon/MHC-II (I)	IFITM1					MP17_Epi-II	CDH17
MP17 Interferon/MHC-II (I)	HLA-DMA					MP17_Epi-II	TFF2
MP17 Interferon/MHC-II (I)	ISG20					MP17_Epi-II	REG4
MP17 Interferon/MHC-II (I)	TNFSF10					MP17_Epi-II	CLDN3
MP17 Interferon/MHC-II (I)	IFI35					MP17_Epi-II	GPA33
MP17 Interferon/MHC-II (I)	IFI44					MP17_Epi-II	CLDN4
MP17 Interferon/MHC-II (I)	HLA-DPB1					MP17_Epi-II	CDH1
MP17 Interferon/MHC-II (I)	HLA-E					MP17_Epi-II	GNPAT
MP17 Interferon/MHC-II (I)	HLA-C					MP17_Epi-II	ELF3
MP17 Interferon/MHC-II (I)	PARP14					MP17_Epi-II	KRT18
MP17 Interferon/MHC-II (I)	WARS					MP17_Epi-II	EPCAM
MP17 Interferon/MHC-II (I)	HLA-DQB1					MP17_Epi-II	KRT8
MP17 Interferon/MHC-II (I)	LAP3					MP17_Epi-II	AGR3
MP17 Interferon/MHC-II (I)	PSMB8					MP17_Epi-II	TFF3
MP17 Interferon/MHC-II (I)	C1S					MP17_Epi-II	LGALS3
MP17 Interferon/MHC-II (I)	PLSCR1					MP17_Epi-II	KRT19
MP17 Interferon/MHC-II (I)	TYMP					MP17_Epi-II	STMN1
MP17 Interferon/MHC-II (I)	IFIT2					MP17_Epi-II	LDHA
MP17 Interferon/MHC-II (I)	SOD2					MP17_Epi-II	CLDN7
MP17 Interferon/MHC-II (I)	GBP2					MP17_Epi-II	MUC2
MP17 Interferon/MHC-II (I)	HLA-A					MP17_Epi-II	ANP32B
MP17 Interferon/MHC-II (I)	CXCL10					MP17_Epi-II	CD24
MP17 Interferon/MHC-II (I)	HLA-DQA1					MP17_Epi-II	OLFM4
MP17 Interferon/MHC-II (I)	PARP9					MP17_Epi-II	PABPC1
MP17 Interferon/MHC-II (I)	B2M					MP17_Epi-II	FTH1
MP18 Interferon/MHC-II (II)	CD74					MP17_Epi-II	FABP2
MP18 Interferon/MHC-II (II)	HLA-DRA					MP17_Epi-II	SCD
MP18 Interferon/MHC-II (II)	HLA-DRB1					MP17_Epi-II	VIL1
MP18 Interferon/MHC-II (II)	HLA-DRA					MP17_Epi-II	GNB2L1
MP18 Interferon/MHC-II (II)	HLA-DPA1					MP17_Epi-II	S100P
MP18 Interferon/MHC-II (II)	IFITM2					MP17_Epi-II	ANXA1
MP18 Interferon/MHC-II (II)	CD9					MP17_Epi-II	GAPDH
MP18 Interferon/MHC-II (II)	CLU					MP17_Epi-II	EFNA1
MP18 Interferon/MHC-II (II)	CRYAB					MP17_Epi-II	CDA
MP18 Interferon/MHC-II (II)	NNMT					MP17_Epi-II	SPINK1
MP18 Interferon/MHC-II (II)	S100A10					MP17_Epi-II	MYO15B
MP18 Interferon/MHC-II (II)	TMEM176B					MP17_Epi-II	TPI1
MP18 Interferon/MHC-II (II)	C1R					MP17_Epi-II	TACSTD2
MP18 Interferon/MHC-II (II)	C1S					MP17_Epi-II	S100A14
MP18 Interferon/MHC-II (II)	DHRS3					MP17_Epi-II	PKM
MP18 Interferon/MHC-II (II)	GPM6B					MP17_Epi-II	ENO1
MP18 Interferon/MHC-II (II)	HLA-DRB5					MP17_Epi-II	APOB
MP18 Interferon/MHC-II (II)	IFI6					MP17_Epi-II	CEACAM5
MP18 Interferon/MHC-II (II)	IFITM3					MP17_Epi-II	GSTP1
MP18 Interferon/MHC-II (II)	PLP1					MP18_Skin	PMEL
MP18 Interferon/MHC-II (II)	RARRES2					MP18_Skin	TSPAN10
MP18 Interferon/MHC-II (II)	S100B					MP18_Skin	TRPM1
MP18 Interferon/MHC-II (II)	SERPING1					MP18_Skin	DCT
MP18 Interferon/MHC-II (II)	TMEM176A					MP18_Skin	TYRP1
MP18 Interferon/MHC-II (II)	ANXA1					MP18_Skin	TYR
MP18 Interferon/MHC-II (II)	C3					MP18_Skin	MLANA
MP18 Interferon/MHC-II (II)	CTNNAL1					MP18_Skin	GPR143
MP18 Interferon/MHC-II (II)	GFRA3					MP18_Skin	SLC45A2
MP18 Interferon/MHC-II (II)	MT2A					MP18_Skin	SILV
MP18 Interferon/MHC-II (II)	PDK4					MP18_Skin	RAB27A
MP18 Interferon/MHC-II (II)	PLAT					MP18_Skin	PAX3
MP18 Interferon/MHC-II (II)	PMP22					MP18_Skin	GPNMB
MP18 Interferon/MHC-II (II)	SEPP1					MP18_Skin	MIA
MP18 Interferon/MHC-II (II)	C10ORF10					MP18_Skin	MITF
MP18 Interferon/MHC-II (II)	EGFL8					MP18_Skin	IRF4
MP18 Interferon/MHC-II (II)	GPX3					MP18_Skin	PABPC1
MP18 Interferon/MHC-II (II)	HLA-DMA					MP18_Skin	SYP
MP18 Interferon/MHC-II (II)	MT1X					MP18_Skin	S100B
MP18 Interferon/MHC-II (II)	SEPP1					MP18_Skin	STMN1
MP18 Interferon/MHC-II (II)	VIM					MP18_Skin	APOE
MP18 Interferon/MHC-II (II)	A2M					MP18_Skin	MET
MP18 Interferon/MHC-II (II)	ARPC1B					MP18_Skin	PPM1E
MP18 Interferon/MHC-II (II)	ISG15					MP18_Skin	SOX10
MP18 Interferon/MHC-II (II)	WFDC2					MP18_Skin	EDNRB
MP18 Interferon/MHC-II (II)	LGALS3BP					MP18_Skin	PLP1
MP18 Interferon/MHC-II (II)	CALM2					MP18_Skin	ERBB3
MP18 Interferon/MHC-II (II)	TUBA1A					MP18_Skin	HNRNPA1
MP18 Interferon/MHC-II (II)	A2M					MP18_Skin	CD24
MP19 Epithelial Senescence	SLPI					MP18_Skin	FABP7
MP19 Epithelial Senescence	S100A9					MP18_Skin	SET
MP19 Epithelial Senescence	LCN2					MP18_Skin	TPI1
MP19 Epithelial Senescence	S100A8					MP18_Skin	LDHA
MP19 Epithelial Senescence	KRT16					MP18_Skin	ANP32B
MP19 Epithelial Senescence	C15ORF48					MP18_Skin	PPIA
MP19 Epithelial Senescence	SPRR1B					MP18_Skin	GAPDH
MP19 Epithelial Senescence	LY6D					MP18_Skin	ENO1
MP19 Epithelial Senescence	S100P					MP18_Skin	TYMS
MP19 Epithelial Senescence	KRT6B					MP18_Skin	PKM
MP19 Epithelial Senescence	PI3					MP18_Skin	RRM2
MP19 Epithelial Senescence	WFDC2					MP18_Skin	PTMA
MP19 Epithelial Senescence	CEACAM6					MP18_Skin	NPM1
MP19 Epithelial Senescence	PDZK1IP1					MP18_Skin	DUT
MP19 Epithelial Senescence	S100A7					MP18_Skin	GNB2L1
MP19 Epithelial Senescence	TSPAN1					MP18_Skin	PCNA
MP19 Epithelial Senescence	KRT13					MP18_Skin	CKB
MP19 Epithelial Senescence	TACSTD2					MP18_Skin	H2AZ1
MP19 Epithelial Senescence	PSCA					MP18_Skin	S100A1
MP19 Epithelial Senescence	IL1RN					MP18_Skin	CDK1
MP19 Epithelial Senescence	LYPD3					MP18_Skin	TOP2A
MP19 Epithelial Senescence	SAA1					MP19_Neuroendocrine	COTL1
MP19 Epithelial Senescence	SERPINB3					MP19_Neuroendocrine	DLL3
MP19 Epithelial Senescence	AQP3					MP19_Neuroendocrine	ASCL1
MP19 Epithelial Senescence	CLDN4					MP19_Neuroendocrine	KLK12
MP19 Epithelial Senescence	SPRR1B					MP19_Neuroendocrine	CHGB
MP19 Epithelial Senescence	KRT17					MP19_Neuroendocrine	INSIG1
MP19 Epithelial Senescence	CRABP2					MP19_Neuroendocrine	HES6
MP19 Epithelial Senescence	ELF3					MP19_Neuroendocrine	ISL1
MP19 Epithelial Senescence	KRT6A					MP19_Neuroendocrine	SOX4
MP19 Epithelial Senescence	MAL2					MP19_Neuroendocrine	SCD
MP19 Epithelial Senescence	SPRR3					MP19_Neuroendocrine	STMN1
MP19 Epithelial Senescence	IGFBP3					MP19_Neuroendocrine	MAP1B
MP19 Epithelial Senescence	PRSS22					MP19_Neuroendocrine	SYP
MP19 Epithelial Senescence	SPRR2D					MP19_Neuroendocrine	MALAT1
MP19 Epithelial Senescence	DSC2					MP19_Neuroendocrine	TPI1
MP19 Epithelial Senescence	GPRC5A					MP19_Neuroendocrine	NEAT1
MP19 Epithelial Senescence	KRT7					MP19_Neuroendocrine	LDHA
MP19 Epithelial Senescence	SPRR2A					MP19_Neuroendocrine	H2AZ1
MP19 Epithelial Senescence	MALL					MP19_Neuroendocrine	SEZ6L2
MP19 Epithelial Senescence	MUC4					MP19_Neuroendocrine	CHGA
MP19 Epithelial Senescence	SERPINB1					MP19_Neuroendocrine	INSM1
MP19 Epithelial Senescence	AGR2					MP19_Neuroendocrine	GNB2L1
MP19 Epithelial Senescence	CLIC3					MP19_Neuroendocrine	TUBB3
MP19 Epithelial Senescence	SERPINB4					MP19_Neuroendocrine	GAPDH
MP19 Epithelial Senescence	FABP5					MP19_Neuroendocrine	ASNS
MP19 Epithelial Senescence	SULT2B1					MP19_Neuroendocrine	SCG3
MP19 Epithelial Senescence	CLDN7					MP19_Neuroendocrine	RRM2
MP20 MYC	NME1					MP19_Neuroendocrine	ENO1
MP20 MYC	C1QBP					MP19_Neuroendocrine	ANP32B
MP20 MYC	FABP5					MP19_Neuroendocrine	CKS1B
MP20 MYC	SRM					MP19_Neuroendocrine	TOP2A
MP20 MYC	EBNA1BP2					MP19_Neuroendocrine	STMN2
MP20 MYC	HSPE1					MP19_Neuroendocrine	HMGB2
MP20 MYC	DCTPP1					MP19_Neuroendocrine	PTMA
MP20 MYC	NOP16					MP19_Neuroendocrine	BIRC5
MP20 MYC	NHP2					MP19_Neuroendocrine	TRIB3
MP20 MYC	MRPL12					MP19_Neuroendocrine	PKM
MP20 MYC	DKC1					MP19_Neuroendocrine	CHAF1B
MP20 MYC	HSPD1					MP19_Neuroendocrine	PPIA
MP20 MYC	RANBP1					MP19_Neuroendocrine	NAP1L1
MP20 MYC	CCT5					MP19_Neuroendocrine	DUT
MP20 MYC	DDX21					MP19_Neuroendocrine	SMC4
MP20 MYC	PA2G4					MP19_Neuroendocrine	UBE2C
MP20 MYC	GPATCH4					MP19_Neuroendocrine	TYMS
MP20 MYC	TOMM40					MP19_Neuroendocrine	HMGB1
MP20 MYC	GNL3					MP19_Neuroendocrine	NUSAP1
MP20 MYC	PAICS					MP19_Neuroendocrine	NPM1
MP20 MYC	RAN					MP19_Neuroendocrine	CKB
MP20 MYC	PPA1					MP19_Neuroendocrine	PABPC1
MP20 MYC	RUVBL1					MP19_Neuroendocrine	CKS2
MP20 MYC	CCT2
MP20 MYC	EIF4EBP1
MP20 MYC	MYC
MP20 MYC	LDHB
MP20 MYC	TIMM13
MP20 MYC	ODC1
MP20 MYC	CYCS
MP20 MYC	EIF5A
MP20 MYC	NIFK
MP20 MYC	NOLC1
MP20 MYC	SNRPD1
MP20 MYC	MRPL3
MP20 MYC	MRTO4
MP20 MYC	SLIRP
MP20 MYC	LDHA
MP20 MYC	APRT
MP20 MYC	PNO1
MP20 MYC	DCAF13
MP20 MYC	ENO1
MP20 MYC	PFDN2
MP20 MYC	NOP58
MP20 MYC	PRMT1
MP20 MYC	BZW2
MP20 MYC	CMSS1
MP20 MYC	FKBP4
MP21 Respiration	SLIRP
MP21 Respiration	ROMO1
MP21 Respiration	ATP5I
MP21 Respiration	COX7B
MP21 Respiration	PET100
MP21 Respiration	ATP5G1
MP21 Respiration	OST4
MP21 Respiration	TMEM258
MP21 Respiration	NDUFA3
MP21 Respiration	NDUFB2
MP21 Respiration	RPL21
MP21 Respiration	USMG5
MP21 Respiration	H3F3A
MP21 Respiration	NDUFA1
MP21 Respiration	SNRPD2
MP21 Respiration	ATP5G1
MP21 Respiration	COX6B1
MP21 Respiration	NDUFS5
MP21 Respiration	NME1
MP21 Respiration	ATP5J2
MP21 Respiration	NDUFB1
MP21 Respiration	NDUFB1
MP21 Respiration	ATOX1
MP21 Respiration	PSMB3
MP21 Respiration	UQCR10
MP21 Respiration	NDUFS6
MP21 Respiration	NEDD8
MP21 Respiration	TIMM8B
MP21 Respiration	MYEOV2
MP21 Respiration	NDUFA12
MP21 Respiration	NDUFC1
MP21 Respiration	SHFM1
MP21 Respiration	COX17
MP21 Respiration	MIR4461
MP21 Respiration	NDUFAB1
MP21 Respiration	NDUFB4
MP21 Respiration	SEC61G
MP21 Respiration	UBL5
MP21 Respiration	APRT
MP21 Respiration	RPS29
MP21 Respiration	SNRPG
MP21 Respiration	LGALS1
MP21 Respiration	NHP2
MP21 Respiration	SNRPF
MP21 Respiration	PFDN2
MP21 Respiration	LSM7
MP21 Respiration	NDUFB8
MP21 Respiration	NDUFA7
MP21 Respiration	RPS21
MP21 Respiration	COA3
MP22 Secreted I	CXCL8
MP22 Secreted I	PHLDA1
MP22 Secreted I	WFDC2
MP22 Secreted I	KDM6B
MP22 Secreted I	EPHA2
MP22 Secreted I	ERRFI1
MP22 Secreted I	CXCL8
MP22 Secreted I	TNFRSF12A
MP22 Secreted I	PHLDA2
MP22 Secreted I	TM4SF1
MP22 Secreted I	TSPAN8
MP22 Secreted I	TRIB1
MP22 Secreted I	DUSP5
MP22 Secreted I	FOSL1
MP22 Secreted I	HBEGF
MP22 Secreted I	ICAM1
MP22 Secreted I	AREG
MP22 Secreted I	BIRC3
MP22 Secreted I	CXCL1
MP22 Secreted I	EMP1
MP22 Secreted I	ITPKC
MP22 Secreted I	MIDN
MP22 Secreted I	PIM3
MP22 Secreted I	ARID5B
MP22 Secreted I	CCL2
MP22 Secreted I	CDKN1A
MP22 Secreted I	CSRNP1
MP22 Secreted I	CXCL2
MP22 Secreted I	MYC
MP22 Secreted I	ARL14
MP22 Secreted I	ARL5B
MP22 Secreted I	GEM
MP22 Secreted I	MYADM
MP22 Secreted I	PIM1
MP22 Secreted I	PLAUR
MP22 Secreted I	TNFAIP3
MP22 Secreted I	ANXA1
MP22 Secreted I	CCL20
MP22 Secreted I	CYR61
MP22 Secreted I	DDX21
MP22 Secreted I	EDN1
MP22 Secreted I	FOSL2
MP22 Secreted I	LIF
MP22 Secreted I	LUCAT1
MP22 Secreted I	MLF1
MP22 Secreted I	NAMPT
MP22 Secreted I	NCOA7
MP22 Secreted I	PFKFB3
MP22 Secreted I	ZBTB43
MP22 Secreted I	ZC3H12A
MP22 Secreted I	FHL2
MP23 Secreted II	LCN2
MP23 Secreted II	CP
MP23 Secreted II	AGR2
MP23 Secreted II	AGR2
MP23 Secreted II	C3
MP23 Secreted II	CXCL1
MP23 Secreted II	CXCL8
MP23 Secreted II	SAA1
MP23 Secreted II	CLU
MP23 Secreted II	MDK
MP23 Secreted II	TSPAN8
MP23 Secreted II	BPIFB1
MP23 Secreted II	CFB
MP23 Secreted II	KLK11
MP23 Secreted II	PDZK1IP1
MP23 Secreted II	SAA2
MP23 Secreted II	SLPI
MP23 Secreted II	TSPAN1
MP23 Secreted II	CXCL2
MP23 Secreted II	ELF3
MP23 Secreted II	LTF
MP23 Secreted II	PIGR
MP23 Secreted II	SCGB3A1
MP23 Secreted II	TFF3
MP23 Secreted II	TGM2
MP23 Secreted II	AKR1C1
MP23 Secreted II	CD24
MP23 Secreted II	CLDN4
MP23 Secreted II	CTSC
MP23 Secreted II	GSTA1
MP23 Secreted II	KRT19
MP23 Secreted II	MMP7
MP23 Secreted II	MSMB
MP23 Secreted II	NCOA7
MP23 Secreted II	S100A9
MP23 Secreted II	SCGB1A1
MP23 Secreted II	SPINK1
MP23 Secreted II	SPINK1
MP23 Secreted II	VMO1
MP23 Secreted II	MUC5B
MP23 Secreted II	SERPINF1
MP23 Secreted II	TNFSF10
MP23 Secreted II	FMO2
MP23 Secreted II	FAM3D
MP23 Secreted II	PRSS23
MP23 Secreted II	RDH10
MP23 Secreted II	CD82
MP23 SecretII	RARRES1
MP23 Secreted II	KYNU
MP23 Secreted II	NDRG2
MP24 Cilia	C9ORF116
MP24 Cilia	CAPS
MP24 Cilia	RSPH1
MP24 Cilia	TPPP3
MP24 Cilia	FAM183A
MP24 Cilia	MORN2
MP24 Cilia	WDR54
MP24 Cilia	CETN2
MP24 Cilia	ODF3B
MP24 Cilia	C9ORF24
MP24 Cilia	PIFO
MP24 Cilia	C11ORF88
MP24 Cilia	C5ORF49
MP24 Cilia	DYNLRB2
MP24 Cilia	C1ORF194
MP24 Cilia	EFHC1
MP24 Cilia	FAM229B
MP24 Cilia	IQCG
MP24 Cilia	PSENEN
MP24 Cilia	SPA17
MP24 Cilia	TSPAN1
MP24 Cilia	C20ORF85
MP24 Cilia	DNALI1
MP24 Cilia	FOXJ1
MP24 Cilia	LRRC23
MP24 Cilia	LRRIQ1
MP24 Cilia	MS4A8
MP24 Cilia	TCTEX1D2
MP24 Cilia	DPCD
MP24 Cilia	KIF9
MP24 Cilia	TUBA1A
MP24 Cilia	C5ORF49
MP24 Cilia	MRPS31
MP24 Cilia	ZMYND10
MP24 Cilia	C12ORF75
MP24 Cilia	CAPSL
MP24 Cilia	CES1
MP24 Cilia	DNAAF1
MP24 Cilia	IFT57
MP24 Cilia	MLF1
MP24 Cilia	OSCP1
MP24 Cilia	PLAC8
MP24 Cilia	DNAH5
MP24 Cilia	CRIP1
MP24 Cilia	RP11-295M3.4
MP24 Cilia	GSTA1
MP24 Cilia	SLC44A4
MP24 Cilia	NUCB2
MP25 Astrocytes	SPARCL1
MP25 Astrocytes	GFAP
MP25 Astrocytes	CLU
MP25 Astrocytes	CRYAB
MP25 Astrocytes	TTYH1
MP25 Astrocytes	SLC1A3
MP25 Astrocytes	CST3
MP25 Astrocytes	ID3
MP25 Astrocytes	AGT
MP25 Astrocytes	APOE
MP25 Astrocytes	EDNRB
MP25 Astrocytes	ALDOC
MP25 Astrocytes	AQP4
MP25 Astrocytes	GATM
MP25 Astrocytes	NDRG2
MP25 Astrocytes	SPARC
MP25 Astrocytes	MT2A
MP25 Astrocytes	MT3
MP25 Astrocytes	BCAN
MP25 Astrocytes	HEPN1
MP25 Astrocytes	NTRK2
MP25 Astrocytes	PMP22
MP25 Astrocytes	PON2
MP25 Astrocytes	ATP1A2
MP25 Astrocytes	HEY1
MP25 Astrocytes	MLC1
MP25 Astrocytes	PLTP
MP25 Astrocytes	ATP1B2
MP25 Astrocytes	ITM2C
MP25 Astrocytes	RAMP1
MP25 Astrocytes	SCRG1
MP25 Astrocytes	C1ORF61
MP25 Astrocytes	IGFBP7
MP25 Astrocytes	ID1
MP25 Astrocytes	IFITM3
MP25 Astrocytes	CPE
MP25 Astrocytes	CD9
MP25 Astrocytes	FABP7
MP25 Astrocytes	GRAMD3
MP25 Astrocytes	ZFP36
MP25 Astrocytes	F3
MP25 Astrocytes	PLP1
MP25 Astrocytes	ID4
MP25 Astrocytes	PSAT1
MP25 Astrocytes	GJA1
MP26 NPC Glioma	STMN2
MP26 NPC Glioma	DCX
MP26 NPC Glioma	STMN4
MP26 NPC Glioma	TAGLN3
MP26 NPC Glioma	ELAVL4
MP26 NPC Glioma	MLLT11
MP26 NPC Glioma	NREP
MP26 NPC Glioma	MIAT
MP26 NPC Glioma	TUBB2A
MP26 NPC Glioma	CD24
MP26 NPC Glioma	HMP19
MP26 NPC Glioma	RND3
MP26 NPC Glioma	SOX11
MP26 NPC Glioma	SOX4
MP26 NPC Glioma	SNAP25
MP26 NPC Glioma	MAP1B
MP26 NPC Glioma	NSG1
MP26 NPC Glioma	FNBP1L
MP26 NPC Glioma	HN1
MP26 NPC Glioma	IGFBPL1
MP26 NPC Glioma	NNAT
MP26 NPC Glioma	DLL1
MP26 NPC Glioma	RBP1
MP26 NPC Glioma	SCG3
MP26 NPC Glioma	DLX6-AS1
MP26 NPC Glioma	KLHDC8A
MP26 NPC Glioma	MEG3
MP26 NPC Glioma	SCG2
MP26 NPC Glioma	STMN1
MP26 NPC Glioma	TMEM161B-AS1
MP26 NPC Glioma	ARL4D
MP26 NPC Glioma	BEX2
MP26 NPC Glioma	DDAH2
MP26 NPC Glioma	DLX5
MP26 NPC Glioma	GAP43
MP26 NPC Glioma	CRMP1
MP26 NPC Glioma	ENO2
MP26 NPC Glioma	TCEAL7
MP26 NPC Glioma	UCHL1
MP26 NPC Glioma	BASP1
MP26 NPC Glioma	CXADR
MP26 NPC Glioma	GNG3
MP26 NPC Glioma	GPC2
MP26 NPC Glioma	KIF5C
MP26 NPC Glioma	PAK3
MP26 NPC Glioma	RTN1
MP26 NPC Glioma	TERF2IP
MP26 NPC Glioma	SYT1
MP27 Oligo Progenitor	SIRT2
MP27 Oligo Progenitor	GPR17
MP27 Oligo Progenitor	OLIG1
MP27 Oligo Progenitor	APOD
MP27 Oligo Progenitor	DLL3
MP27 Oligo Progenitor	PLP1
MP27 Oligo Progenitor	NEU4
MP27 Oligo Progenitor	BCAN
MP27 Oligo Progenitor	SOX8
MP27 Oligo Progenitor	TNR
MP27 Oligo Progenitor	OMG
MP27 Oligo Progenitor	TMEM206
MP27 Oligo Progenitor	LPPR1
MP27 Oligo Progenitor	NKAIN4
MP27 Oligo Progenitor	FIBIN
MP27 Oligo Progenitor	SGK1
MP27 Oligo Progenitor	SLC1A1
MP27 Oligo Progenitor	CA10
MP27 Oligo Progenitor	LMF1
MP27 Oligo Progenitor	SERINC5
MP27 Oligo Progenitor	ASCL1
MP27 Oligo Progenitor	DLL1
MP27 Oligo Progenitor	OLIG2
MP27 Oligo Progenitor	PSAT1
MP27 Oligo Progenitor	RAB33A
MP27 Oligo Progenitor	SCRG1
MP27 Oligo Progenitor	CNP
MP27 Oligo Progenitor	THY1
MP27 Oligo Progenitor	BCAS1
MP27 Oligo Progenitor	CNTN1
MP27 Oligo Progenitor	HES6
MP27 Oligo Progenitor	LHFPL3
MP27 Oligo Progenitor	PDGFRA
MP27 Oligo Progenitor	RGR
MP27 Oligo Progenitor	SCD5
MP27 Oligo Progenitor	ANGPTL2
MP27 Oligo Progenitor	DHCR7
MP27 Oligo Progenitor	FGF12
MP27 Oligo Progenitor	MPZL1
MP27 Oligo Progenitor	MSMO1
MP27 Oligo Progenitor	P2RX7
MP27 Oligo Progenitor	RTKN
MP27 Oligo Progenitor	TNFRSF21
MP27 Oligo Progenitor	SMOC1
MP27 Oligo Progenitor	ACAT2
MP27 Oligo Progenitor	FDFT1
MP27 Oligo Progenitor	PGRMC1
MP28 Oligo normal	APOD
MP28 Oligo normal	MBP
MP28 Oligo normal	PLA2G16
MP28 Oligo normal	PLP1
MP28 Oligo normal	PPP1R14A
MP28 Oligo normal	SEPP1
MP28 Oligo normal	TF
MP28 Oligo normal	GSN
MP28 Oligo normal	PTGDS
MP28 Oligo normal	APLP1
MP28 Oligo normal	CLDN11
MP28 Oligo normal	CLDND1
MP28 Oligo normal	CNP
MP28 Oligo normal	RNASE1
MP28 Oligo normal	SCD
MP28 Oligo normal	2026-09-04
MP28 Oligo normal	ANLN
MP28 Oligo normal	CRYAB
MP28 Oligo normal	ELOVL1
MP28 Oligo normal	HSPA2
MP28 Oligo normal	PLLP
MP28 Oligo normal	SIRT2
MP28 Oligo normal	SLC44A1
MP28 Oligo normal	BIN1
MP28 Oligo normal	CMTM5
MP28 Oligo normal	ERMN
MP28 Oligo normal	FAM107B
MP28 Oligo normal	LARP6
MP28 Oligo normal	MAG
MP28 Oligo normal	MOBP
MP28 Oligo normal	PLEKHB1
MP28 Oligo normal	QDPR
MP28 Oligo normal	S100A1
MP28 Oligo normal	SLAIN1
MP28 Oligo normal	SLC48A1
MP28 Oligo normal	TUBB4A
MP28 Oligo normal	TMEM144
MP28 Oligo normal	ABCA2
MP28 Oligo normal	CA2
MP28 Oligo normal	KLK6
MP28 Oligo normal	MAL
MP28 Oligo normal	SPOCK3
MP28 Oligo normal	HAPLN2
MP28 Oligo normal	UGT8
MP28 Oligo normal	STMN4
MP28 Oligo normal	ATP1B1
MP28 Oligo normal	2026-09-08
MP28 Oligo normal	PACS2
MP28 Oligo normal	ANKS1B
MP29 NPC/OPC	BTG2
MP29 NPC/OPC	SOX6
MP29 NPC/OPC	BAZ2B
MP29 NPC/OPC	SOX4
MP29 NPC/OPC	DSEL
MP29 NPC/OPC	MXD4
MP29 NPC/OPC	PNRC1
MP29 NPC/OPC	SOX5
MP29 NPC/OPC	CHD7
MP29 NPC/OPC	GRIA2
MP29 NPC/OPC	MAP3K1
MP29 NPC/OPC	OLIG1
MP29 NPC/OPC	SESN3
MP29 NPC/OPC	UBE2H
MP29 NPC/OPC	ABAT
MP29 NPC/OPC	DCX
MP29 NPC/OPC	DOCK10
MP29 NPC/OPC	GLCCI1
MP29 NPC/OPC	KCNQ1OT1
MP29 NPC/OPC	KDM5B
MP29 NPC/OPC	KLHL24
MP29 NPC/OPC	MAP2
MP29 NPC/OPC	OLIG2
MP29 NPC/OPC	PEAK1
MP29 NPC/OPC	RAB3IP
MP29 NPC/OPC	RNASE1
MP29 NPC/OPC	RFX4
MP29 NPC/OPC	TANC2
MP29 NPC/OPC	TRIO
MP29 NPC/OPC	VCAN
MP29 NPC/OPC	ZNF91
MP29 NPC/OPC	FAM181B
MP29 NPC/OPC	STMN4
MP29 NPC/OPC	BTG1
MP29 NPC/OPC	TXNIP
MP29 NPC/OPC	LDLRAD3
MP29 NPC/OPC	SOX11
MP29 NPC/OPC	HIP1
MP29 NPC/OPC	FGFBP3
MP29 NPC/OPC	MTSS1
MP29 NPC/OPC	SPRY4
MP29 NPC/OPC	REV3L
MP29 NPC/OPC	MMP16
MP29 NPC/OPC	KLF12
MP29 NPC/OPC	TFDP2
MP29 NPC/OPC	CADM2
MP29 NPC/OPC	ARHGEF7
MP29 NPC/OPC	GOLGB1
MP29 NPC/OPC	ZMYM2
MP30 PDAC-classical	TFF1
MP30 PDAC-classical	TFF3
MP30 PDAC-classical	CEACAM6
MP30 PDAC-classical	AGR2
MP30 PDAC-classical	LGALS4
MP30 PDAC-classical	PHGR1
MP30 PDAC-classical	PLAC8
MP30 PDAC-classical	SLC40A1
MP30 PDAC-classical	TM4SF4
MP30 PDAC-classical	TSPAN8
MP30 PDAC-classical	ANXA10
MP30 PDAC-classical	LYZ
MP30 PDAC-classical	TFF2
MP30 PDAC-classical	CTSE
MP30 PDAC-classical	GCNT3
MP30 PDAC-classical	GPX2
MP30 PDAC-classical	MUC13
MP30 PDAC-classical	MUC5AC
MP30 PDAC-classical	MUC5B
MP30 PDAC-classical	PIGR
MP30 PDAC-classical	CEACAM5
MP30 PDAC-classical	CLDN18
MP30 PDAC-classical	FAM3D
MP30 PDAC-classical	SPINK1
MP30 PDAC-classical	AGR3
MP30 PDAC-classical	DUOX2
MP30 PDAC-classical	PLA2G10
MP30 PDAC-classical	REG4
MP30 PDAC-classical	DUOXA2
MP30 PDAC-classical	PDE4C
MP30 PDAC-classical	PSCA
MP30 PDAC-classical	TSPAN1
MP30 PDAC-classical	VSIG2
MP30 PDAC-classical	CA2
MP30 PDAC-classical	DPCR1
MP30 PDAC-classical	OLFM4
MP30 PDAC-classical	AKR7A3
MP30 PDAC-classical	CDH17
MP30 PDAC-classical	FXYD3
MP30 PDAC-classical	PDZK1IP1
MP30 PDAC-classical	TCN1
MP30 PDAC-classical	CEACAM1
MP30 PDAC-classical	ISG20
MP30 PDAC-classical	LINC01133
MP30 PDAC-classical	SLC44A4
MP30 PDAC-classical	VSIG1
MP30 PDAC-classical	CEACAM7
MP30 PDAC-classical	CXCL17
MP30 PDAC-classical	CES2
MP31 Alveolar	SFTPA1
MP31 Alveolar	SFTPA2
MP31 Alveolar	SFTPD
MP31 Alveolar	LRRK2
MP31 Alveolar	PGC
MP31 Alveolar	SFTPC
MP31 Alveolar	C4BPA
MP31 Alveolar	GDF15
MP31 Alveolar	SFTPB
MP31 Alveolar	ABCA3
MP31 Alveolar	PEBP4
MP31 Alveolar	SCD
MP31 Alveolar	HSD17B6
MP31 Alveolar	MFSD2A
MP31 Alveolar	NAPSA
MP31 Alveolar	NNMT
MP31 Alveolar	SCGB3A2
MP31 Alveolar	SERPINA1
MP31 Alveolar	C16ORF89
MP31 Alveolar	FXYD3
MP31 Alveolar	CACNA2D2
MP31 Alveolar	EPHX1
MP31 Alveolar	MID1IP1
MP31 Alveolar	RNASE1
MP31 Alveolar	ALPL
MP31 Alveolar	DHCR24
MP31 Alveolar	LPCAT1
MP31 Alveolar	SFTA2
MP31 Alveolar	SFTA2
MP31 Alveolar	PTPN13
MP31 Alveolar	SFTA3
MP31 Alveolar	SUSD2
MP31 Alveolar	DMBT1
MP31 Alveolar	NPC2
MP31 Alveolar	SLC22A31
MP31 Alveolar	TFPI
MP31 Alveolar	SFTA1P
MP31 Alveolar	AK1
MP31 Alveolar	DUOX1
MP31 Alveolar	FASN
MP31 Alveolar	FABP5
MP31 Alveolar	CXCL17
MP31 Alveolar	SDR16C5
MP31 Alveolar	LAMP3
MP32 Skin-pigmentation	PHACTR1
MP32 Skin-pigmentation	TBC1D7
MP32 Skin-pigmentation	MLANA
MP32 Skin-pigmentation	ASAH1
MP32 Skin-pigmentation	DCT
MP32 Skin-pigmentation	LGALS3
MP32 Skin-pigmentation	CAPN3
MP32 Skin-pigmentation	GPNMB
MP32 Skin-pigmentation	GPR137B
MP32 Skin-pigmentation	MBP
MP32 Skin-pigmentation	MITF
MP32 Skin-pigmentation	PMEL
MP32 Skin-pigmentation	TNFRSF14
MP32 Skin-pigmentation	BIRC7
MP32 Skin-pigmentation	CHCHD6
MP32 Skin-pigmentation	LINC00518
MP32 Skin-pigmentation	MXI1
MP32 Skin-pigmentation	NOV
MP32 Skin-pigmentation	TRPM1
MP32 Skin-pigmentation	APOE
MP32 Skin-pigmentation	QDPR
MP32 Skin-pigmentation	QPCT
MP32 Skin-pigmentation	DHCR24
MP32 Skin-pigmentation	TIMP2
MP32 Skin-pigmentation	TRIM2
MP32 Skin-pigmentation	AVPI1
MP32 Skin-pigmentation	DAB2
MP32 Skin-pigmentation	GPR143
MP32 Skin-pigmentation	GYPC
MP32 Skin-pigmentation	LYST
MP32 Skin-pigmentation	NSG1
MP32 Skin-pigmentation	PIR
MP32 Skin-pigmentation	RAB38
MP32 Skin-pigmentation	RRAGD
MP32 Skin-pigmentation	S100B
MP32 Skin-pigmentation	SLC45A2
MP32 Skin-pigmentation	SNCA
MP32 Skin-pigmentation	TBC1D16
MP32 Skin-pigmentation	TYRP1
MP32 Skin-pigmentation	WIPI1
MP32 Skin-pigmentation	SPON2
MP32 Skin-pigmentation	ZNF106
MP32 Skin-pigmentation	BCL2A1
MP32 Skin-pigmentation	SNX10
MP33 RBCs	BLVRB
MP33 RBCs	HBB
MP33 RBCs	APOC1
MP33 RBCs	CA1
MP33 RBCs	HBD
MP33 RBCs	AHSP
MP33 RBCs	PRDX2
MP33 RBCs	REXO2
MP33 RBCs	CNRIP1
MP33 RBCs	HMBS
MP33 RBCs	S100A6
MP33 RBCs	HAGH
MP33 RBCs	PLIN2
MP33 RBCs	RHAG
MP33 RBCs	CD36
MP33 RBCs	FAM178B
MP33 RBCs	FECH
MP33 RBCs	HES6
MP33 RBCs	KCNH2
MP33 RBCs	KLF1
MP33 RBCs	MYC
MP33 RBCs	TFRC
MP33 RBCs	ANK1
MP33 RBCs	APOE
MP33 RBCs	CASP3
MP33 RBCs	HBA1
MP33 RBCs	HBG2
MP33 RBCs	MPC2
MP33 RBCs	NFIA
MP33 RBCs	STRADB
MP33 RBCs	SYNGR1
MP33 RBCs	TFR2
MP33 RBCs	TMEM14C
MP33 RBCs	UBAC1
MP33 RBCs	CA2
MP33 RBCs	GATA1
MP33 RBCs	GYPB
MP33 RBCs	HBA2
MP33 RBCs	HBQ1
MP33 RBCs	SMIM10
MP33 RBCs	FAM45A
MP33 RBCs	FCGRT
MP33 RBCs	SLC25A37
MP33 RBCs	LMNA
MP33 RBCs	HBG1
MP33 RBCs	UROD
MP33 RBCs	CSF2RB
MP34 Platelet-activation	RGS18
MP34 Platelet-activation	PDLIM1
MP34 Platelet-activation	ITGA2B
MP34 Platelet-activation	PLEK
MP34 Platelet-activation	C6ORF25
MP34 Platelet-activation	FERMT3
MP34 Platelet-activation	RAP1B
MP34 Platelet-activation	CLU
MP34 Platelet-activation	LIMS1
MP34 Platelet-activation	CD9
MP34 Platelet-activation	NRGN
MP34 Platelet-activation	PBX1
MP34 Platelet-activation	PF4
MP34 Platelet-activation	PKM
MP34 Platelet-activation	RP11-354E11.2
MP34 Platelet-activation	SDPR
MP34 Platelet-activation	SLC44A1
MP34 Platelet-activation	TMSB4X
MP34 Platelet-activation	CMTM5
MP34 Platelet-activation	GP9
MP34 Platelet-activation	GSN
MP34 Platelet-activation	LAT
MP34 Platelet-activation	MAX
MP34 Platelet-activation	VCL
MP34 Platelet-activation	ACTN1
MP34 Platelet-activation	DAD1
MP34 Platelet-activation	FYB
MP34 Platelet-activation	MGLL
MP34 Platelet-activation	MMRN1
MP34 Platelet-activation	PPIF
MP34 Platelet-activation	TPM1
MP34 Platelet-activation	BIN2
MP34 Platelet-activation	CCND3
MP34 Platelet-activation	FCER1A
MP34 Platelet-activation	GATA2
MP34 Platelet-activation	VASP
MP34 Platelet-activation	RAB27B
MP34 Platelet-activation	GP9
MP34 Platelet-activation	GUCY1B3
MP34 Platelet-activation	PRKAR2B
MP34 Platelet-activation	TGFB1
MP34 Platelet-activation	HLA-DQB1
MP34 Platelet-activation	MPP1
MP34 Platelet-activation	SEL1L3
MP34 Platelet-activation	PIM1
MP34 Platelet-activation	CD36
MP34 Platelet-activation	LGALS1
MP34 Platelet-activation	CKB
MP35 Hemato-related-I	CSF3R
MP35 Hemato-related-I	SPINK2
MP35 Hemato-related-I	VAMP5
MP35 Hemato-related-I	AZU1
MP35 Hemato-related-I	SELL
MP35 Hemato-related-I	C1QTNF4
MP35 Hemato-related-I	CFD
MP35 Hemato-related-I	CTSG
MP35 Hemato-related-I	ELANE
MP35 Hemato-related-I	AZU1
MP35 Hemato-related-I	NPDC1
MP35 Hemato-related-I	AVP
MP35 Hemato-related-I	C1ORF228
MP35 Hemato-related-I	CD52
MP35 Hemato-related-I	CLEC11A
MP35 Hemato-related-I	CRHBP
MP35 Hemato-related-I	CST7
MP35 Hemato-related-I	MBOAT7
MP35 Hemato-related-I	MDK
MP35 Hemato-related-I	PLAC8
MP35 Hemato-related-I	PRTN3
MP35 Hemato-related-I	RNASE2
MP35 Hemato-related-I	VAMP5
MP35 Hemato-related-I	BST2
MP35 Hemato-related-I	C19ORF77
MP35 Hemato-related-I	CD44
MP35 Hemato-related-I	GLIPR1
MP35 Hemato-related-I	ICAM3
MP35 Hemato-related-I	KLF6
MP35 Hemato-related-I	MPO
MP35 Hemato-related-I	MS4A3
MP35 Hemato-related-I	PRSS57
MP35 Hemato-related-I	RAB32
MP35 Hemato-related-I	SRGN
MP35 Hemato-related-I	TSC22D3
MP35 Hemato-related-I	ZFP36L2
MP35 Hemato-related-I	FOS
MP35 Hemato-related-I	SERPINB1
MP35 Hemato-related-I	IGLL1
MP35 Hemato-related-I	LYZ
MP35 Hemato-related-I	MGST1
MP35 Hemato-related-I	TNFSF13B
MP35 Hemato-related-I	HLA-DQB1
MP35 Hemato-related-I	CD74
MP35 Hemato-related-I	PTPRCAP
MP35 Hemato-related-I	ANKRD28
MP35 Hemato-related-I	CD34
MP35 Hemato-related-I	CPA3
MP35 Hemato-related-I	KIAA0125
MP36 IG	IGLC2
MP36 IG	IGLC3
MP36 IG	IGHA2
MP36 IG	IGHA1
MP36 IG	IGHG4
MP36 IG	IGKC
MP36 IG	CD79A
MP36 IG	IGHG1
MP36 IG	IGHG3
MP36 IG	IGHG2
MP36 IG	IGHGP
MP36 IG	IGLJ2
MP36 IG	IGLC1
MP36 IG	DERL3
MP36 IG	IGHM
MP36 IG	IGLC7
MP36 IG	SELENOM
MP36 IG	CD63
MP36 IG	IGLV3-1
MP36 IG	IGLV3-7
MP36 IG	IGLV6-57
MP36 IG	JSRP1
MP36 IG	CCPG1
MP36 IG	DNAJB9
MP36 IG	IGKV1-12
MP36 IG	IGLJ1
MP36 IG	KLF6
MP36 IG	TSC22D3
MP36 IG	JCHAIN
MP36 IG	MIR4539
MP36 IG	SEL1L3
MP36 IG	PRDX4
MP36 IG	IRF4
MP36 IG	HLA-F
MP36 IG	IGKV4-1
MP36 IG	IGLC5
MP36 IG	IGLC6
MP36 IG	IGLJ3
MP36 IG	IGLL5
MP36 IG	IGLV3-21
MP36 IG	ITGB7
MP36 IG	PBX1
MP36 IG	TXNIP
MP36 IG	CD82
MP36 IG	HERPUD1
MP36 IG	TPSB2
MP36 IG	ZEB2
MP36 IG	STXBP6
MP36 IG	KCNQ1OT1
MP37 Hemato-related-II	CTNNBL1
MP37 Hemato-related-II	FCER1A
MP37 Hemato-related-II	GATA2
MP37 Hemato-related-II	AZU1
MP37 Hemato-related-II	SELL
MP37 Hemato-related-II	SLC40A1
MP37 Hemato-related-II	TESPA1
MP37 Hemato-related-II	ZMYND8
MP37 Hemato-related-II	CYTL1
MP37 Hemato-related-II	MINPP1
MP37 Hemato-related-II	PDCD4
MP37 Hemato-related-II	PKIG
MP37 Hemato-related-II	RP11-354E11.2
MP37 Hemato-related-II	SOD2
MP37 Hemato-related-II	STAM
MP37 Hemato-related-II	ABCC4
MP37 Hemato-related-II	ALDH1A1
MP37 Hemato-related-II	ATP6V0A2
MP37 Hemato-related-II	PLEK
MP37 Hemato-related-II	CD82
MP37 Hemato-related-II	CNRIP1
MP37 Hemato-related-II	CPA3
MP37 Hemato-related-II	CPPED1
MP37 Hemato-related-II	DEPTOR
MP37 Hemato-related-II	GMPR
MP37 Hemato-related-II	HBD
MP37 Hemato-related-II	HPGDS
MP37 Hemato-related-II	IL1B
MP37 Hemato-related-II	KLF1
MP37 Hemato-related-II	LXN
MP37 Hemato-related-II	NFE2
MP37 Hemato-related-II	PLEK
MP37 Hemato-related-II	PLIN2
MP37 Hemato-related-II	RAB37
MP37 Hemato-related-II	RGS18
MP37 Hemato-related-II	TPSB2
MP37 Hemato-related-II	ZEB2
MP37 Hemato-related-II	STXBP6
MP37 Hemato-related-II	KCNQ1OT1
MP37 Hemato-related-II	BMP2K
MP37 Hemato-related-II	EREG
MP37 Hemato-related-II	LINC0152
MP37 Hemato-related-II	FREM1
MP37 Hemato-related-II	PBX1
MP37 Hemato-related-II	PDLIM1
MP37 Hemato-related-II	MPP1
MP37 Hemato-related-II	SOX4
MP37 Hemato-related-II	FAM117A
MP37 Hemato-related-II	FAM19A2
MP37 Hemato-related-II	ICAM4
MP37 Hemato-related-II	CASP3
MP38 Glutathione	NAT8
MP38 Glutathione	ACSM2B
MP38 Glutathione	LGALS2
MP38 Glutathione	AMN
MP38 Glutathione	BBOX1
MP38 Glutathione	KHK
MP38 Glutathione	MIOX
MP38 Glutathione	SMIM24
MP38 Glutathione	AQP1
MP38 Glutathione	C11ORF54
MP38 Glutathione	CUBN
MP38 Glutathione	GSTA1
MP38 Glutathione	GLYAT
MP38 Glutathione	ACSM2A
MP38 Glutathione	AOC1
MP38 Glutathione	APOM
MP38 Glutathione	GAL3ST1
MP38 Glutathione	GSTA2
MP38 Glutathione	SLC6A13
MP38 Glutathione	AZGP1
MP38 Glutathione	GLYATL1
MP38 Glutathione	LRP2
MP38 Glutathione	PCSK1N
MP38 Glutathione	GLYAT
MP38 Glutathione	SLC17A3
MP38 Glutathione	SLC5A12
MP38 Glutathione	CDHR5
MP38 Glutathione	MSRA
MP38 Glutathione	PDZK1
MP38 Glutathione	PXMP2
MP38 Glutathione	SLC16A9
MP38 Glutathione	SLC22A18
MP38 Glutathione	AGT
MP38 Glutathione	CES2
MP38 Glutathione	CLDN10
MP38 Glutathione	DDC
MP38 Glutathione	TMEM27
MP38 Glutathione	TNFAIP6
MP38 Glutathione	AGXT2
MP38 Glutathione	CFI
MP38 Glutathione	FOLR1
MP38 Glutathione	GAMT
MP38 Glutathione	HRSP12
MP38 Glutathione	RBP5
MP38 Glutathione	TSPAN1
MP38 Glutathione	GPX3
MP38 Glutathione	CX14
MP38 Glutathione	PRAP1
MP38 Glutathione	LACTB2
MP38 Glutathione	GCHFR
MP39 Metal-response	MT1X
MP39 Metal-response	CAV1
MP39 Metal-response	MT1E
MP39 Metal-response	C5ORF46
MP39 Metal-response	TGFBI
MP39 Metal-response	CEBPB
MP39 Metal-response	CKB
MP39 Metal-response	EPB41L4A-AS1
MP39 Metal-response	IGFBP5
MP39 Metal-response	LGALS1
MP39 Metal-response	LOX
MP39 Metal-response	MT1M
MP39 Metal-response	MT2A
MP39 Metal-response	MT3
MP39 Metal-response	NOLC3
MP39 Metal-response	STC1
MP39 Metal-response	TUBA1A
MP39 Metal-response	C10ORF10
MP39 Metal-response	CP
MP39 Metal-response	DDIT4
MP39 Metal-response	EMP3
MP39 Metal-response	GLUL
MP39 Metal-response	MT1F
MP39 Metal-response	NPTX2
MP39 Metal-response	PLP2
MP39 Metal-response	SMIM3
MP39 Metal-response	SNHG7
MP39 Metal-response	SOX4
MP39 Metal-response	BGN
MP39 Metal-response	EDN1
MP39 Metal-response	ID4
MP39 Metal-response	IER2
MP39 Metal-response	MT1A
MP39 Metal-response	PMP22
MP39 Metal-response	RSL24D1
MP39 Metal-response	TSC22D3
MP39 Metal-response	VCAM1
MP39 Metal-response	VCAN
MP39 Metal-response	FSTL3
MP39 Metal-response	TMEM45A
MP39 Metal-response	ZBTB16
MP39 Metal-response	TMEM91
MP39 Metal-response	FKBP5
MP39 Metal-response	S100A6
MP39 Metal-response	C1R
MP39 Metal-response	MMP7
MP39 Metal-response	KLF4
MP39 Metal-response	ANXA1
MP39 Metal-response	MT1X
MP40 PDAC-related	ISG20
MP40 PDAC-related	KLK10
MP40 PDAC-related	CEACAM1
MP40 PDAC-related	F3
MP40 PDAC-related	LMO7
MP40 PDAC-related	PLAUR
MP40 PDAC-related	SLPI
MP40 PDAC-related	ANKRD36C
MP40 PDAC-related	CD55
MP40 PDAC-related	CEACAM6
MP40 PDAC-related	EPS8L1
MP40 PDAC-related	LCN2
MP40 PDAC-related	PSCA
MP40 PDAC-related	TIMP2
MP40 PDAC-related	C15ORF48
MP40 PDAC-related	KLF2
MP40 PDAC-related	KLK6
MP40 PDAC-related	KLK7
MP40 PDAC-related	KRT23
MP40 PDAC-related	LAMC2
MP40 PDAC-related	S100A4
MP40 PDAC-related	TNFRSF12A
MP40 PDAC-related	ALDH1A3
MP40 PDAC-related	ANXA1
MP40 PDAC-related	APOL1
MP40 PDAC-related	CLDN23
MP40 PDAC-related	CLIC3
MP40 PDAC-related	COL6A1
MP40 PDAC-related	CST6
MP40 PDAC-related	EMP1
MP40 PDAC-related	FLNB
MP40 PDAC-related	ID1
MP40 PDAC-related	IL32
MP40 PDAC-related	KLK11
MP40 PDAC-related	KRT16
MP40 PDAC-related	KRT17
MP40 PDAC-related	LDLR
MP40 PDAC-related	MALL
MP40 PDAC-related	MMP7
MP40 PDAC-related	RAB11FIP1
MP40 PDAC-related	SLC16A3
MP40 PDAC-related	TFF2
MP40 PDAC-related	CEACAM5
MP40 PDAC-related	MUC5AC
MP40 PDAC-related	SDCBP2
MP40 PDAC-related	SMIM5
MP40 PDAC-related	ISG15
MP40 PDAC-related	SLC2A1
MP40 PDAC-related	LRRC8A
MP40 PDAC-related	MT1X
MP41 Unassigned	DST
MP41 Unassigned	KMT2A
MP41 Unassigned	MALAT1
MP41 Unassigned	MIR6515
MP41 Unassigned	AKAP9
MP41 Unassigned	ATRX
MP41 Unassigned	GOLGB1
MP41 Unassigned	ZBTB20
MP41 Unassigned	EIF3A
MP41 Unassigned	MIR3648-1
MP41 Unassigned	ANKRD12
MP41 Unassigned	GOLGA4
MP41 Unassigned	HNRNPU
MP41 Unassigned	HSP90B2P
MP41 Unassigned	PRRC2C
MP41 Unassigned	RRBP1
MP41 Unassigned	TTC3
MP41 Unassigned	CFLAR
MP41 Unassigned	DDX24
MP41 Unassigned	EPRS
MP41 Unassigned	FNDC3B
MP41 Unassigned	HSP90B3P
MP41 Unassigned	IRF4
MP41 Unassigned	MLEC
MP41 Unassigned	PRRC2C
MP41 Unassigned	NCL
MP41 Unassigned	NEAT1
MP41 Unassigned	NEB
MP41 Unassigned	PNISR
MP41 Unassigned	PNRC1
MP41 Unassigned	SNORD18B
MP41 Unassigned	UBXN4
MP41 Unassigned	AC010343.1
MP41 Unassigned	BPTF
MP41 Unassigned	CCDC69
MP41 Unassigned	CEP350
MP41 Unassigned	DDX5
MP41 Unassigned	EIF5B
MP41 Unassigned	GLCCI1
MP41 Unassigned	HIPK2
MP41 Unassigned	KMT2C
MP41 Unassigned	LUC7L3
MP41 Unassigned	MEF2C
MP41 Unassigned	PDIA4
MP41 Unassigned	SNORD55
MP41 Unassigned	SNORD68
MP41 Unassigned	SON
MP41 Unassigned	UTRN
MP41 Unassigned	ZBTB38
MP41 Unassigned	XIST

## Sheet: Myeloid
Xing et al				Daniela et al
PMID: 40215980 DOI: 10.1016/j.ccell.2025.03.025				PMID: 41339555 DOI: 10.1038/s41586-025-09807-0
celltype		symbol		cell state	symbol
M01	Mono-Resting	FCN1		Immunosuppression	HAVCR2
M01	Mono-Resting	VCAN		Immunosuppression	FCGR2B
M01	Mono-Resting	PLAC8		Immunosuppression	IL4R
M01	Mono-Resting	SELL		Immunosuppression	CD274
M02	Mono-Inflammation	FCN1		Immunosuppression	HIF1A
M02	Mono-Inflammation	VCAN		Immunosuppression	IL15
M02	Mono-Inflammation	TNF		ECM remodeling	ADAMDEC1
M02	Mono-Inflammation	IL1A		ECM remodeling	CTSC
M02	Mono-Inflammation	IL1B		ECM remodeling	CTSB
M03	Mono-IFN	FCN1		ECM remodeling	RGCC
M03	Mono-IFN	VCAN		ECM remodeling	CTSS
M03	Mono-IFN	IFIT1		ECM remodeling	CTSZ
M03	Mono-IFN	MX1		ECM remodeling	ADAM17
M03	Mono-IFN	ISG15		ECM remodeling	MMP9
M04	TAMacro-Hypoxic	BNIP3		ECM remodeling	MMP8
M04	TAMacro-Hypoxic	HK2		ECM remodeling	MMP2
M04	TAMacro-Hypoxic	SLC2A1		ECM remodeling	TIMP1
M04	TAMacro-Hypoxic	ADM		Tumor proliferation	TGFB1
M05	TAMacro-Lipid	FABP4		Tumor proliferation	TNF
M05	TAMacro-Lipid	FBP1		Tumor proliferation	IL1A
M05	TAMacro-Lipid	LPL		Myeloid cell recruitment	CCL3
M05	TAMacro-Lipid	FABP5		Myeloid cell recruitment	MIF
M06	TAMacro-Metal	MT1G		Myeloid cell recruitment	CXCL14
M06	TAMacro-Metal	MT1X		Myeloid cell recruitment	CSF1
M06	TAMacro-Metal	MT2A		Myeloid cell recruitment	VEGFA
M07	TAMacro-IFNI	IFIT1		Myeloid cell recruitment	CCL4
M07	TAMacro-IFNI	MX1		Myeloid cell recruitment	CXCL3
M07	TAMacro-IFNI	ISG15		Angiogenesis	VEGFA
M08	TAMacro-IFNII	CXCL9		Angiogenesis	SND1
M08	TAMacro-IFNII	CXCL10		Angiogenesis	MTDH
M08	TAMacro-IFNII	CXCL11		Angiogenesis	ITGA5
M09	TAMacro-Inflammation	CCL20		Angiogenesis	TNF
M09	TAMacro-Inflammation	CCL3		Angiogenesis	CXCL3
M09	TAMacro-Inflammation	CXCL2		Angiogenesis	ANXA3
M09	TAMacro-Inflammation	CXCL3		Angiogenesis	HIF1A
M10	TAMacro-Resident	SELENOP		Angiogenesis	MMP9
M10	TAMacro-Resident	LYVE1		Angiogenesis	FGF2
M10	TAMacro-Resident	IGFBP4		Hypoxia response	HIF1A
M11	TAMacro-Phagocytosis	PLA2G7		Hypoxia response	VEGFA
M11	TAMacro-Phagocytosis	CYP27A1		Hypoxia response	SDHA
M11	TAMacro-Phagocytosis	ACP5		Hypoxia response	PGK1
M12	Microglia	CX3CR1		Hypoxia response	LDHA
M12	Microglia	TMEM119		Hypoxia response	SLC2A1
M12	Microglia	P2RY12		Hypoxia response	EPO
M12	Microglia	SCIN		Oxidative stress	SOD1
M13	Neutrophil	G0S2		Oxidative stress	SOD2
M13	Neutrophil	FCGR3B		Oxidative stress	CAT
M13	Neutrophil	CSF3R		Oxidative stress	GPX1
M14	DC-cDC1	CLEC9A		Oxidative stress	NFE2L2
M14	DC-cDC1	CLNK		Oxidative stress	HMOX1
M14	DC-cDC1	XCR1		Oxidative stress	TXN
M15	DC-cDC2	CD1C		Apoptosis	BCL2A1
M15	DC-cDC2	CLEC10A		Apoptosis	BAX
M15	DC-cDC2	FCER1A		Apoptosis	CASP3
M15	DC-cDC2	CD1E		Apoptosis	CASP8
M16	DC-Migration	LAMP3		Apoptosis	CASP9
M16	DC-Migration	CCR7		Neutrophil maturation	SELL
M16	DC-Migration	CCL19		Neutrophil maturation	NLRP3
M16	DC-Migration	CCL22		Neutrophil maturation	ITGAM
M17	pDC	LILRA4		Neutrophil maturation	FCGR1A
M17	pDC	MZB1		Neutrophil maturation	FCGR3B
M17	pDC	JCHAIN		Senescence related	CDKN2A
M18	Mast	TPSB2		Senescence related	CDKN1A
M18	Mast	MS4A2		Senescence related	TP53
M18	Mast	CPA3		Senescence related	IL6
M19	Cycling-G1S	MCM6		Senescence related	TGFBR1
M19	Cycling-G1S	MCM3		Senescence related	TNFRSF1A
M19	Cycling-G1S	PCNA
M20	Cycling-G2M	MKI67
M20	Cycling-G2M	BIRC5
M20	Cycling-G2M	TOP2A

## Sheet: Lymphocyte
Chu et al
PMID: 37248301 DOI: 10.1038/s41591-023-02371-y
celltype	symbol
Naïve	IL7R
Naïve	CCR7
Naïve	SELL
Naïve	FOXO1
Naïve	KLF2
Naïve	KLF3
Naïve	LEF1
Naïve	TCF7
Naïve	ACTN1
Naïve	FOXP1
Activation:Effector function	FAS
Activation:Effector function	FASLG
Activation:Effector function	CD44
Activation:Effector function	CD69
Activation:Effector function	CD38
Activation:Effector function	NKG7
Activation:Effector function	KLRB1
Activation:Effector function	KLRD1
Activation:Effector function	KLRF1
Activation:Effector function	KLRG1
Activation:Effector function	KLRK1
Activation:Effector function	FCGR3A
Activation:Effector function	CX3CR1
Activation:Effector function	CD300A
Activation:Effector function	FGFBP2
Activation:Effector function	ID2
Activation:Effector function	ID3
Activation:Effector function	PRDM1
Activation:Effector function	RUNX3
Activation:Effector function	TBX21
Activation:Effector function	ZEB2
Activation:Effector function	BATF
Activation:Effector function	IRF4
Activation:Effector function	NR4A1
Activation:Effector function	NR4A2
Activation:Effector function	NR4A3
Activation:Effector function	PBX3
Activation:Effector function	ZNF683
Activation:Effector function	HOPX
Activation:Effector function	FOS
Activation:Effector function	FOSB
Activation:Effector function	JUN
Activation:Effector function	JUNB
Activation:Effector function	JUND
Activation:Effector function	STAT1
Activation:Effector function	STAT2
Activation:Effector function	STAT5A
Activation:Effector function	STAT6
Activation:Effector function	STAT4
Activation:Effector function	EOMES
Exhaustion	PDCD1
Exhaustion	LAYN
Exhaustion	HAVCR2
Exhaustion	LAG3
Exhaustion	CD244
Exhaustion	CTLA4
Exhaustion	LILRB1
Exhaustion	TIGIT
Exhaustion	TOX
Exhaustion	VSIR
Exhaustion	BTLA
Exhaustion	ENTPD1
Exhaustion	CD160
Exhaustion	LAIR1
TCR Signaling	CALM1
TCR Signaling	CALM2
TCR Signaling	CALM3
TCR Signaling	CAST
TCR Signaling	CD247
TCR Signaling	CD3D
TCR Signaling	CD3E
TCR Signaling	CD3G
TCR Signaling	CSK
TCR Signaling	DOK1
TCR Signaling	DOK2
TCR Signaling	FYN
TCR Signaling	LCK
TCR Signaling	NFATC2
TCR Signaling	NFATC1
TCR Signaling	NFATC4
TCR Signaling	NFATC3
TCR Signaling	PLEK
TCR Signaling	PAG1
TCR Signaling	PTPN11
TCR Signaling	PTPN2
TCR Signaling	PTPN22
TCR Signaling	PTPN4
TCR Signaling	PTPN6
TCR Signaling	PTPN7
TCR Signaling	PTPRC
TCR Signaling	PTPRCAP
TCR Signaling	S100A10
TCR Signaling	S100A11
TCR Signaling	S100A13
TCR Signaling	S100A4
TCR Signaling	S100A6
TCR Signaling	ZAP70
TCR Signaling	DUSP1
TCR Signaling	DUSP2
TCR Signaling	DUSP4
TCR Signaling	DUSP5
TCR Signaling	DUSP10
TCR Signaling	LAT
TCR Signaling	PLCG1
TCR Signaling	PLCG2
TCR Signaling	PPP3CA
TCR Signaling	PPP3CC
TCR Signaling	FOS
TCR Signaling	FOSB
TCR Signaling	FOSL1
TCR Signaling	FOSL2
TCR Signaling	JUN
TCR Signaling	JUNB
TCR Signaling	JUND
TCR Signaling	NR4A1
TCR Signaling	NR4A2
TCR Signaling	NR4A3
TCR Signaling	BATF
TCR Signaling	IRF4
TCR Signaling	SH2D2A
Cytotoxicity	GZMA
Cytotoxicity	GZMB
Cytotoxicity	GZMH
Cytotoxicity	GZMK
Cytotoxicity	GNLY
Cytotoxicity	PRF1
Cytotoxicity	IFNG
Cytotoxicity	TNF
Cytotoxicity	SERPINB1
Cytotoxicity	SERPINB6
Cytotoxicity	SERPINB9
Cytotoxicity	CTSA
Cytotoxicity	CTSB
Cytotoxicity	CTSC
Cytotoxicity	CTSD
Cytotoxicity	CTSW
Cytotoxicity	CST3
Cytotoxicity	CST7
Cytotoxicity	CSTB
Cytotoxicity	LAMP1
Cytotoxicity	LAMP3
Cytotoxicity	CAPN2
Cytokine/Cytokine receptor	CSF1
Cytokine/Cytokine receptor	IL10RA
Cytokine/Cytokine receptor	IL16
Cytokine/Cytokine receptor	IL17RA
Cytokine/Cytokine receptor	IL18RAP
Cytokine/Cytokine receptor	IL21R
Cytokine/Cytokine receptor	IL2RB
Cytokine/Cytokine receptor	IL2RG
Cytokine/Cytokine receptor	IL32
Cytokine/Cytokine receptor	IL9R
Cytokine/Cytokine receptor	ADAM10
Cytokine/Cytokine receptor	ADAM8
Cytokine/Cytokine receptor	METRNL
Cytokine/Cytokine receptor	CD70
Chemokine/Chemokine receptor	CCR4
Chemokine/Chemokine receptor	CCR5
Chemokine/Chemokine receptor	CCR7
Chemokine/Chemokine receptor	CXCR3
Chemokine/Chemokine receptor	CXCR4
Chemokine/Chemokine receptor	CXCR5
Chemokine/Chemokine receptor	CXCR6
Chemokine/Chemokine receptor	CCL3
Chemokine/Chemokine receptor	CCL4
Chemokine/Chemokine receptor	CCL4L2
Chemokine/Chemokine receptor	CCL5
Chemokine/Chemokine receptor	CXCL13
Chemokine/Chemokine receptor	CXCL8
Chemokine/Chemokine receptor	XCL1
Chemokine/Chemokine receptor	XCL2
Senescence	KLRK1
Senescence	IFNAR1
Senescence	TAB1
Senescence	SESN2
Anergy	NT5E
Anergy	LAG3
Anergy	NRP1
Anergy	DGKA
Anergy	CBLB
Anergy	RNF128
Anergy	ITCH
Anergy	NFATC2
Anergy	EGR2
Anergy	EGR3
Anergy	NR4A1
Anergy	TOB1
NFKB Signaling	NFKB1
NFKB Signaling	NFKB2
NFKB Signaling	NFKBIA
NFKB Signaling	NFKBIB
NFKB Signaling	NFKBIZ
NFKB Signaling	CHUK
NFKB Signaling	IKBKB
NFKB Signaling	IKBKG
NFKB Signaling	REL
NFKB Signaling	RELA
NFKB Signaling	RELB
Stress response	HIKESHI
Stress response	P4HB
Stress response	UBA52
Stress response	MAPK1
Stress response	RPA2
Stress response	RPA3
Stress response	TNRC6A
Stress response	TNRC6B
Stress response	TNRC6C
Stress response	NUP210
Stress response	RBX1
Stress response	UBB
Stress response	UBC
Stress response	CREBBP
Stress response	ETS1
Stress response	LAMTOR1
Stress response	EED
Stress response	LAMTOR2
Stress response	HSP90AA1
Stress response	RBBP4
Stress response	LAMTOR4
Stress response	LAMTOR5
Stress response	PSMB10
Stress response	CDKN1A
Stress response	ANAPC11
Stress response	PSMA1
Stress response	ATG4D
Stress response	PSMA2
Stress response	WIPI2
Stress response	PSMA3
Stress response	TFDP2
Stress response	PSMA4
Stress response	ATM
Stress response	CYCS
Stress response	PSMA5
Stress response	WDR45
Stress response	ANAPC16
Stress response	PSMA6
Stress response	EHMT1
Stress response	PSMA7
Stress response	EHMT2
Stress response	TERF1
Stress response	PSMC1
Stress response	ATR
Stress response	PSMC3
Stress response	SOD1
Stress response	PSMC4
Stress response	PSMC5
Stress response	PSMC6
Stress response	PSME1
Stress response	ATG3
Stress response	NCF1
Stress response	PSME2
Stress response	ATG5
Stress response	CHMP2A
Stress response	CHMP2B
Stress response	GSK3B
Stress response	RPS19BP1
Stress response	TPR
Stress response	MDM4
Stress response	ELOB
Stress response	CDC26
Stress response	ELOC
Stress response	ST13
Stress response	RPS6KA1
Stress response	EEF1A1
Stress response	RPS6KA3
Stress response	CHMP4A
Stress response	DNAJB1
Stress response	CAMK2G
Stress response	RPS27A
Stress response	TXN2
Stress response	PRDX1
Stress response	PRDX2
Stress response	DNAJB6
Stress response	FKBP4
Stress response	PRDX3
Stress response	MAP2K3
Stress response	MTMR14
Stress response	ATG12
Stress response	PRDX5
Stress response	RHEB
Stress response	PRDX6
Stress response	GSTP1
Stress response	ATG14
Stress response	RELA
Stress response	VHL
Stress response	HSPA1A
Stress response	UBE2D1
Stress response	TERF2IP
Stress response	HSPA1B
Stress response	UBE2D2
Stress response	TXN
Stress response	UBE2D3
Stress response	HSPH1
Stress response	CYBA
Stress response	CDK4
Stress response	HSF1
Stress response	CDK6
Stress response	MAPKAPK3
Stress response	CITED2
Stress response	MAP1LC3B
Stress response	PSMD12
Stress response	HIF1A
Stress response	HMGA1
Stress response	PSMD13
Stress response	MINK1
Stress response	PSMD14
Stress response	HSP90AB1
Stress response	PTGES3
Stress response	CXCL8
Stress response	HSBP1
Stress response	NFKB1
Stress response	UVRAG
Stress response	CAT
Stress response	PSMB1
Stress response	CDKN2C
Stress response	PSMB2
Stress response	CDKN2D
Stress response	FOS
Stress response	PSMB3
Stress response	CCS
Stress response	JUN
Stress response	GABARAPL1
Stress response	GABARAPL2
Stress response	PSMB6
Stress response	KDM6B
Stress response	PSMB8
Stress response	PSMD2
Stress response	TNIK
Stress response	PSMB9
Stress response	PSMD3
Stress response	RANBP2
Stress response	ATOX1
Stress response	SEM1
Stress response	PSMD6
Stress response	GABARAP
Stress response	PSMD7
Stress response	PSMF1
Stress response	CHMP3
Stress response	STAT3
Stress response	PSMD8
Stress response	TINF2
Stress response	PSMD9
Stress response	CHMP7
Stress response	CCAR2
Stress response	HSPA4
Stress response	YWHAE
Stress response	BAG1
Stress response	HSPA5
Stress response	HSPA6
Stress response	BAG3
Stress response	DYNLL1
Stress response	HSPA8
Stress response	RB1CC1
Stress response	BAG5
Stress response	ANAPC5
Stress response	DYNLL2
Stress response	VCP
Stress response	DNAJC2
Stress response	CABIN1
Stress response	CEBPB
MAPK Signaling	MAP2K1
MAPK Signaling	MAP2K2
MAPK Signaling	MAP2K3
MAPK Signaling	MAP3K4
MAPK Signaling	MAP3K5
MAPK Signaling	MAP3K8
MAPK Signaling	MAP4K1
MAPK Signaling	MAP4K5
MAPK Signaling	MAPK1
MAPK Signaling	MAPK3
MAPK Signaling	MAPK11
MAPK Signaling	MAPK13
MAPK Signaling	MAPK14
MAPK Signaling	MAPK1IP1L
MAPK Signaling	MAPKAPK3
MAPK Signaling	MAPK8
MAPK Signaling	MAPK9
MAPK Signaling	MAP2K7
MAPK Signaling	MAPK10
MAPK Signaling	MAP3K7
Adhesion	ITGA1
Adhesion	ITGA4
Adhesion	ITGAE
Adhesion	ITGAL
Adhesion	ITGAM
Adhesion	ITGB1
Adhesion	ITGB2
Adhesion	ITGB7
Adhesion	SELL
Adhesion	SELPLG
Adhesion	S1PR1
Adhesion	VCAM1
Adhesion	ICAM2
Adhesion	ICAM3
IFN Response	IFIT1
IFN Response	IFIT2
IFN Response	IFIT3
IFN Response	IFIT5
IFN Response	STAT1
IFN Response	STAT2
IFN Response	MX1
IFN Response	IRF1
IFN Response	IRF4
IFN Response	IRF7
IFN Response	IRF8
IFN Response	IRF9
IFN Response	ISG15
IFN Response	ISG20
IFN Response	IFITM1
IFN Response	IFITM2
IFN Response	IFITM3
IFN Response	OAS1
IFN Response	OAS2
IFN Response	OAS3
IFN Response	JAK1
IFN Response	JAK2
IFN Response	SOCS1
IFN Response	SOCS3
IFN Response	TRIM14
IFN Response	TRIM21
IFN Response	TRIM22
IFN Response	APOL1
IFN Response	APOL2
IFN Response	APOL6
IFN Response	IFNGR1
IFN Response	GBP1
IFN Response	GBP2
IFN Response	GBP4
IFN Response	GBP5
IFN Response	GBP3
IFN Response	BST2
IFN Response	CMPK2
IFN Response	DDX60
IFN Response	DDX60L
IFN Response	IFI30
IFN Response	IFI35
IFN Response	IFI44
IFN Response	IFI44L
IFN Response	IFI6
IFN Response	IFIH1
IFN Response	PARP10
IFN Response	PARP12
IFN Response	PARP14
Oxidative phosphorylation	ATP1B3
Oxidative phosphorylation	ATP2A3
Oxidative phosphorylation	ATP2B1
Oxidative phosphorylation	ATP2B4
Oxidative phosphorylation	ATP5F1A
Oxidative phosphorylation	ATP5F1B
Oxidative phosphorylation	ATP5F1C
Oxidative phosphorylation	ATP5F1D
Oxidative phosphorylation	ATP5F1E
Oxidative phosphorylation	ATP5IF1
Oxidative phosphorylation	ATP5MC1
Oxidative phosphorylation	ATP5MC2
Oxidative phosphorylation	ATP5MC3
Oxidative phosphorylation	ATP5ME
Oxidative phosphorylation	ATP5MF
Oxidative phosphorylation	ATP5MG
Oxidative phosphorylation	ATP5PB
Oxidative phosphorylation	ATP5PD
Oxidative phosphorylation	ATP5PF
Oxidative phosphorylation	ATP6AP1
Oxidative phosphorylation	ATP6AP2
Oxidative phosphorylation	ATP6V0B
Oxidative phosphorylation	ATP6V0C
Oxidative phosphorylation	ATP6V0D1
Oxidative phosphorylation	ATP6V0E1
Oxidative phosphorylation	ATP6V0E2
Oxidative phosphorylation	ATP6V1D
Oxidative phosphorylation	ATP6V1F
Oxidative phosphorylation	ATP6V1G1
Oxidative phosphorylation	ATP8B2
Oxidative phosphorylation	ATP8B4
Oxidative phosphorylation	COX16
Oxidative phosphorylation	COX17
Oxidative phosphorylation	COX4I1
Oxidative phosphorylation	COX5A
Oxidative phosphorylation	COX5B
Oxidative phosphorylation	COX6A1
Oxidative phosphorylation	COX6B1
Oxidative phosphorylation	COX6C
Oxidative phosphorylation	COX7A2
Oxidative phosphorylation	COX7B
Oxidative phosphorylation	COX7C
Oxidative phosphorylation	COX8A
Oxidative phosphorylation	CYC1
Oxidative phosphorylation	NDUFA1
Oxidative phosphorylation	NDUFA10
Oxidative phosphorylation	NDUFA11
Oxidative phosphorylation	NDUFA12
Oxidative phosphorylation	NDUFA13
Oxidative phosphorylation	NDUFA2
Oxidative phosphorylation	NDUFA3
Oxidative phosphorylation	NDUFA4
Oxidative phosphorylation	NDUFA5
Oxidative phosphorylation	NDUFA6
Oxidative phosphorylation	NDUFAB1
Oxidative phosphorylation	NDUFAF3
Oxidative phosphorylation	NDUFAF4
Oxidative phosphorylation	NDUFAF8
Oxidative phosphorylation	NDUFB10
Oxidative phosphorylation	NDUFB11
Oxidative phosphorylation	NDUFB2
Oxidative phosphorylation	NDUFB3
Oxidative phosphorylation	NDUFB4
Oxidative phosphorylation	NDUFB6
Oxidative phosphorylation	NDUFB7
Oxidative phosphorylation	NDUFB8
Oxidative phosphorylation	NDUFB9
Oxidative phosphorylation	NDUFC1
Oxidative phosphorylation	NDUFC2
Oxidative phosphorylation	NDUFS2
Oxidative phosphorylation	NDUFS3
Oxidative phosphorylation	NDUFS5
Oxidative phosphorylation	NDUFS6
Oxidative phosphorylation	NDUFS7
Oxidative phosphorylation	NDUFS8
Oxidative phosphorylation	NDUFV1
Oxidative phosphorylation	NDUFV2
Oxidative phosphorylation	SDHA
Oxidative phosphorylation	SDHB
Oxidative phosphorylation	TCIRG1
Oxidative phosphorylation	UQCRB
Oxidative phosphorylation	UQCRC1
Oxidative phosphorylation	UQCRC2
Oxidative phosphorylation	UQCRFS1
Oxidative phosphorylation	UQCRH
Oxidative phosphorylation	UQCRQ
Oxidative phosphorylation	SURF1
Oxidative phosphorylation	SURF4
Glycolysis	SLC2A3
Glycolysis	SLC2A8
Glycolysis	PFKFB3
Glycolysis	ALDOA
Glycolysis	ENO1
Glycolysis	GAPDH
Glycolysis	GPI
Glycolysis	PGAM1
Glycolysis	PGK1
Glycolysis	PKM
Glycolysis	TPI1
Glycolysis	GYG1
Glycolysis	MDH1
Glycolysis	MDH2
Glycolysis	LDHA
Glycolysis	LDHB
Glycolysis	ADH5
Glycolysis	IDH2
Fatty acid metabolism	ACAA1
Fatty acid metabolism	ACADM
Fatty acid metabolism	ACADVL
Fatty acid metabolism	ACSL5
Fatty acid metabolism	ALDH16A1
Fatty acid metabolism	ALDH9A1
Fatty acid metabolism	ECH1
Fatty acid metabolism	ECHS1
Fatty acid metabolism	HADHA
Fatty acid metabolism	HSD17B10
Fatty acid metabolism	SLC27A2
Fatty acid metabolism	DECR1
Fatty acid metabolism	PEX16
Fatty acid metabolism	SCP2
Pro-apoptosis	BCL2L11
Pro-apoptosis	BID
Pro-apoptosis	BIN1
Pro-apoptosis	BIN2
Pro-apoptosis	BAX
Pro-apoptosis	BAK1
Pro-apoptosis	CASP8
Pro-apoptosis	CASP3
Anti-apoptosis	BCL11B
Anti-apoptosis	BCL2L1
Anti-apoptosis	BAG3
Anti-apoptosis	BAG4
Anti-apoptosis	BIRC3
Anti-apoptosis	GADD45B

## Sheet: Stroma
Yang et al			Xing et al			Gonzalez et al
PMID: 39303725 DOI: 10.1016/j.ccell.2024.08.020			PMID: 40215980 DOI: 10.1016/j.ccell.2025.03.025			PMID: 35063085 DOI: 10.1016/j.cell.2021.12.043
celltype	symbol		celltype	symbol		celltype	symbol
c01	MYH11		S01_CAF.POSTN	POSTN		MSC.like.c2	APOD
c01	ADIRF		S01_CAF.POSTN	COL1A1		MSC.like.c2	COL1A1
c01	RERGL		S01_CAF.POSTN	COL10A1		MSC.like.c2	CTHRC1
c01	ACTA2		S01_CAF.POSTN	THBS2		MSC.like.c2	ISLR
c01	PLN		S02_CAF.VEGFA	VEGFA		MSC.like.c2	TIMP1
c01	RGS5		S02_CAF.VEGFA	VEGFC		MSC.like.c2	COL3A1
c01	MYL9		S02_CAF.VEGFA	HILPDA		MSC.like.c2	IGFBP2
c01	TAGLN		S02_CAF.VEGFA	ADM		MSC.like.c2	DCN
c01	BCAM		S02_CAF.VEGFA	NDRG1		MSC.like.c2	MGP
c01	DSTN		S03_CAF.GAP43	GAP43		MSC.like.c2	MT2A
c01	CRIP1		S03_CAF.GAP43	CLDN11		MSC.like.c2	COL1A2
c01	SNCG		S03_CAF.GAP43	WNT4		MSC.like.c2	FN1
c01	MCAM		S03_CAF.GAP43	CYP1B1		MSC.like.c2	COL6A3
c01	TPM2		S03_CAF.GAP43	C7		MSC.like.c2	RAMP1
c01	CSRP2		S04_CAF.CFD	CFD		MSC.like.c2	LUM
c01	SORBS2		S04_CAF.CFD	CXCL12		MSC.like.c2	THBS2
c01	PTP4A3		S04_CAF.CFD	CXCL14		MSC.like.c2	POSTN
c01	TINAGL1		S04_CAF.CFD	IGF1		MSC.like.c2	PTN
c01	NET1		S04_CAF.CFD	GAS2		MSC.like.c2	CYP1B1
c01	MTRNR2L8		S05_CAF.IFN	IFIT1		MSC.like.c2	S100A13
c01	CNN1		S05_CAF.IFN	OAS1		MSC.like.c2	CCDC80
c01	LBH		S05_CAF.IFN	MX1		MSC.like.c2	VCAN
c01	NDUFA4L2		S05_CAF.IFN	CXCL10		MSC.like.c2	IGFBP6
c01	GJA4					MSC.like.c2	RARRES2
c01	MYLK					MSC.like.c2	TIMP3
c01	CRIP2					MSC.like.c2	PTGDS
c01	ACTG2					MSC.like.c2	ITGBL1
c01	SPARCL1					MSC.like.c2	C1S
c01	CSRP1					MSC.like.c2	TNFRSF12A
c01	LMOD1					MSC.like.c2	NBL1
c01	PPP1R14A					MSC.like.c1	CTHRC1
c01	MAP3K7CL					MSC.like.c1	RAMP1
c01	TSC22D1					MSC.like.c1	LUM
c01	MEF2C					MSC.like.c1	DCN
c01	NOTCH3					MSC.like.c1	MMP11
c01	C11orf96					MSC.like.c1	FHL2
c01	SOD3					MSC.like.c1	ASPN
c01	ISYNA1					MSC.like.c1	NBL1
c01	CRYAB					MSC.like.c1	ISLR
c01	PHLDA2					MSC.like.c1	IGFBP2
c01	MT1M					MSC.like.c1	IGF2
c01	FLNA					MSC.like.c1	AEBP1
c01	CAV1					MSC.like.c1	MGP
c01	JAG1					MSC.like.c1	TNFRSF12A
c01	PGF					MSC.like.c1	ID3
c01	CAV2					MSC.like.c1	COL1A1
c01	MFGE8					MSC.like.c1	S100A13
c01	EFHD1					MSC.like.c1	COL3A1
c01	FRZB					MSC.like.c1	NR2F1
c01	C1QTNF1					MSC.like.c1	PLAU
c01	HES4					MSC.like.c1	COL6A3
c01	MYL6					MSC.like.c1	CALD1
c01	PDK4					MSC.like.c1	RARRES2
c01	GADD45B					MSC.like.c1	ADM
c01	RCAN2					MSC.like.c1	FN1
c01	ESAM					MSC.like.c1	INHBA
c01	NTRK2					MSC.like.c1	NNMT
c01	EPAS1					MSC.like.c1	ATF3
c01	TPM1					MSC.like.c1	MT2A
c01	GPRC5C
c01	NUDT4
c01	COX4I2
c01	LPP
c01	ADAMTS1
c01	CASQ2
c01	CCDC3
c01	MTHFD2
c01	ACTN4
c01	PPP1R12A
c01	MAP1B
c01	OAZ2
c01	PDGFA
c01	RHOB
c01	SH3BGRL
c01	PPP1R12B
c01	CPM
c01	C12orf75
c01	PTK2
c01	ARPC1A
c01	MGST3
c01	TNS1
c01	MTRNR2L12
c01	ZFHX3
c01	HSPB1
c01	LGI4
c01	MT1E
c01	NDUFA4
c01	UBA2
c01	WFDC1
c01	ACTB
c01	PTMA
c01	CALM2
c01	MT1X
c01	AOC3
c01	FHL5
c01	TBX2
c01	SYNPO2
c01	ITGA7
c01	CD151
c01	NRGN
c01	FKBP5
c01	CLMN
c01	KLHL23
c01	SERPINI1
c01	TOB1
c01	CDKN1A
c01	CDH6
c01	KCNMB1
c01	MSRB3
c01	CCDC107
c01	PCSK7
c01	CAVIN3
c01	MAPRE2
c01	CRIM1
c01	CALD1
c01	SLC25A4
c01	ANGPT2
c01	COL18A1
c01	KCNAB1
c01	MRVI1
c01	SGCA
c01	ROCK1
c01	ID4
c01	HEYL
c01	TBC1D1
c01	RASL12
c01	CARMN
c01	IGFBP7
c01	FOXS1
c01	PARM1
c01	SELENOW
c01	FABP4
c01	SORT1
c01	PLS3
c01	HIGD1B
c01	COX7A1
c01	OLFML2A
c01	COX7A2
c01	UTRN
c01	CSPG4
c01	PPP1CB
c01	EHD2
c01	WDR1
c01	FILIP1
c01	RASD1
c01	IGFBP5
c01	EDNRA
c01	TGFB1I1
c01	SYNM
c01	SYNE2
c01	ARHGDIB
c01	CAP2
c01	NRIP2
c01	CKB
c01	ZBTB16
c01	SYNGR2
c01	NEXN
c01	RBPMS2
c01	MOB2
c01	ACTN1
c01	ARHGAP29
c01	COX17
c01	KANK2
c01	EPS8
c01	ILK
c01	HCFC1R1
c01	BGN
c01	NOL3
c01	ANAPC16
c01	FXYD1
c01	S100A4
c01	MGLL
c01	TMEM38B
c01	LAMA5
c01	NDRG2
c01	PDLIM5
c01	CHCHD10
c01	CCND1
c01	RBPMS
c01	ID3
c01	CYSTM1
c01	CD9
c01	COX5B
c01	TLN1
c01	COX6A1
c01	HEY2
c01	NDUFB7
c01	RASGRP2
c01	LHFPL6
c01	ARPC5
c01	INPP4B
c01	DMPK
c01	HSPB6
c01	STOM
c01	TTLL7
c01	BTG2
c01	PDE3A
c01	PACSIN2
c01	ANXA6
c01	NR2F2
c01	UQCRB
c01	ARID5A
c01	NR4A1
c01	CAMK2G
c01	MRGPRF
c01	KCNE4
c01	HSPB8
c01	SBDS
c01	PDLIM3
c01	ARHGEF17
c01	PDE5A
c01	PDLIM7
c01	ATP5MC2
c01	RASL11A
c01	PDGFRB
c01	CPE
c01	FRY
c01	COBLL1
c01	SLC7A2
c01	MRPL33
c01	CAMTA1
c01	RGS16
c01	ATP2B4
c01	TMEM47
c01	HIST1H4C
c01	ARHGEF7
c01	LTBP1
c01	CHURC1
c01	SORBS3
c01	COX6C
c01	ADAMTS4
c01	PHLDB2
c01	FADS3
c01	GJC1
c01	EEF1G
c01	RSU1
c01	SLMAP
c01	KIAA0040
c01	B3GNT2
c01	CALM1
c01	CAP1
c01	COX14
c01	NFASC
c01	GBP2
c01	COX8A
c01	NTN4
c01	NDUFB10
c01	CFL2
c01	ENTPD1
c01	SLIT3
c01	FDFT1
c01	ATF3
c01	PNRC1
c01	C12orf57
c01	FAU
c01	PLP2
c01	PPDPF
c01	FBXO32
c01	HSDL2
c01	ABTB1
c01	CABIN1
c01	ID1
c01	HIP1
c01	COX7B
c01	IFITM1
c01	HLA-C
c01	VCL
c01	JUNB
c01	PHLDA1
c01	ALDOA
c01	NDUFB9
c01	ARHGAP10
c01	RERG
c01	MAP7D3
c01	H2AFJ
c01	MYH9
c01	SKP1
c01	PKIG
c01	PTGIR
c01	PDLIM1
c01	COX7C
c01	VASP
c01	SMTN
c01	C1orf54
c01	SMIM12
c01	YWHAZ
c01	CAPZA2
c01	HMGN3
c01	NGRN
c01	GPX3
c01	H1F0
c01	NDUFB1
c01	CAVIN1
c01	CBX6
c01	TSC22D3
c01	PFN1
c01	PICALM
c01	PSME1
c01	EBF1
c01	MSN
c01	CYB5R3
c01	TOB2
c01	RABGAP1
c01	CALM3
c01	PBXIP1
c01	ADCY3
c01	SYPL1
c01	GAPDH
c01	COX20
c01	YWHAQ
c01	NDUFV2
c01	PLAC9
c01	RAD23A
c01	ANGPT1
c01	BTG1
c01	NDUFA1
c01	UBXN1
c01	UQCR11
c01	CLIC4
c01	ESD
c01	LDHB
c01	TACC1
c01	RHOA
c01	NDUFB4
c01	MPRIP
c01	GSTK1
c01	GSTP1
c01	IFITM2
c01	PNPLA2
c01	CSDE1
c01	CDKN1B
c01	PDE1A
c01	AK1
c01	ZFYVE21
c01	UQCRC1
c01	MEF2D
c01	EZR
c01	ARPC2
c01	PRKG1
c01	C5orf24
c01	SLC25A5
c01	ZFAND1
c01	NAPA
c01	PPIA
c01	NDUFC1
c01	DBI
c01	CRISPLD2
c01	UQCRQ
c01	IQGAP1
c01	CD46
c01	NDUFS5
c01	LRRC32
c01	KLF2
c01	KTN1
c01	VDAC2
c01	ATP5F1B
c01	EMD
c01	NDUFA12
c01	FIS1
c01	RALY
c01	ANP32B
c01	OSBPL9
c01	NDUFA3
c01	NR4A2
c01	ARL6IP4
c01	PIN1
c01	ARHGAP1
c01	NFIB
c01	CYCS
c01	ACTR3
c01	NDUFA5
c01	VAMP2
c01	CDK2AP2
c01	CRTAP
c02	ADAMDEC1
c02	CCL13
c02	CCL8
c02	IGHA1
c02	CTSC
c02	APOE
c02	FABP5
c02	STMN2
c02	LINC01082
c02	CXCL14
c02	HAPLN1
c02	TMEM176B
c02	TCF21
c02	ADAM28
c02	ABCA8
c02	CYGB
c02	TMEM176A
c02	CCL2
c02	IGLC2
c02	MFAP4
c02	IGHA2
c02	PROCR
c02	EDIL3
c02	RBP1
c02	PITX1
c02	IGLC3
c02	BMP4
c02	IGKC
c02	CARD16
c02	SMPDL3A
c02	MATN2
c02	SCARA5
c02	SOD3
c02	QSOX1
c02	LTBP4
c02	HAAO
c02	GAS5
c02	PTN
c02	SNHG5
c02	APOC1
c02	PLAT
c02	WARS
c02	SOCS3
c02	SFTA1P
c02	RPL13A
c02	CFD
c02	IRF1
c02	NKX2-3
c02	WNT2B
c02	VCAM1
c02	SLC9A3R2
c02	ACP5
c02	IL34
c02	RGS10
c02	LSP1
c02	PTCH1
c02	PPP1R14A
c02	PTGER2
c02	FOXF1
c02	EMID1
c02	RPL7
c02	GNG11
c02	UBE2E3
c02	FBLN1
c02	DMKN
c02	C2
c02	TNFSF10
c02	ZFP36L2
c02	EMILIN1
c02	PMP22
c02	ITIH5
c02	FENDRR
c02	C1S
c02	A2M
c02	CASP1
c02	TM4SF1
c02	GPX3
c02	RPS2
c02	RPL3
c02	RAB13
c02	AKR1B1
c02	RPL27A
c02	HES1
c02	CLEC2B
c02	RPS4Y1
c02	COX7C
c02	ZFP36
c02	ADH1B
c02	RPS7
c02	CFH
c02	CP
c02	RPL21
c02	SPRY1
c02	UBB
c02	EEF1D
c02	DKK3
c02	ACVRL1
c02	RPS27
c02	PDLIM1
c02	CLEC11A
c02	GADD45G
c02	LUM
c02	SNAI2
c02	GRK5
c02	NDUFAF4
c02	RARRES2
c02	NOVA1
c02	SGCE
c02	RPL41
c02	RPL31
c02	RPL18A
c02	S100A13
c02	RPLP2
c02	GSTM3
c02	RPS19
c02	PPA1
c02	RPS6
c02	IL6ST
c02	CYBA
c02	RPS9
c02	HNRNPA1
c02	C1R
c02	U2AF1
c02	C1orf21
c02	FHL2
c02	RPS15A
c02	CD63
c02	JUN
c02	PTGDS
c02	RPL35
c02	PRNP
c02	NBEAL1
c02	RPL13
c02	GPC6
c02	RPL26
c02	FABP4
c02	RPS12
c02	RPS20
c02	ADM
c02	FTH1
c02	LGALS3BP
c02	JUNB
c02	SERPINB6
c02	RPS16
c02	RPL27
c02	PCDH18
c02	RPL15
c02	RPL10A
c02	RPS27A
c02	GGT5
c02	RPL10
c02	RPL6
c02	SNHG6
c02	PSME2
c02	ETS2
c02	BSG
c02	RPL4
c02	GCSH
c02	PYCARD
c02	PBX1
c02	RPS28
c02	HLA-C
c02	TMEM205
c02	ITM2C
c02	RPS29
c02	RPS18
c02	TMEM59
c02	FHL1
c02	NDN
c02	PSME1
c02	EPHX1
c02	PSMB9
c02	TLE4
c02	TSPAN4
c02	TYMP
c02	FOS
c02	TMSB4X
c02	EDF1
c02	ECM1
c02	COX4I1
c02	PGRMC1
c02	RGS2
c02	SNX3
c02	IFI27L2
c02	RPL38
c02	IGFBP3
c02	B2M
c02	NDUFB8
c02	TMBIM4
c02	SIGIRR
c02	RPS3A
c02	TMEM256
c02	CSF1
c02	RPS5
c02	IER2
c02	RPL23A
c02	TMEM98
c02	RPL32
c02	NDUFA11
c02	C4orf3
c02	HMGN2
c02	EEF1A1
c02	SLC25A6
c02	AKR7A2
c02	RPL34
c02	FARP1
c03	APOD
c03	C3
c03	CFD
c03	PTGDS
c03	GSN
c03	SRPX
c03	IGF1
c03	CXCL12
c03	CCDC80
c03	ITM2A
c03	DPT
c03	ADH1B
c03	CFH
c03	FBLN1
c03	MGST1
c03	DCN
c03	SVEP1
c03	CXCL14
c03	ABCA10
c03	ABCA6
c03	SFRP2
c03	NOVA1
c03	GPC3
c03	SERPINF1
c03	LRP1
c03	SPRY1
c03	GPNMB
c03	MGP
c03	FGF7
c03	IGFBP4
c03	RARRES1
c03	ABCA9
c03	RNASE4
c03	C1S
c03	SERPING1
c03	ALDH1A1
c03	FBLN2
c03	EFEMP1
c03	CHRDL1
c03	PODN
c03	FGL2
c03	COL15A1
c03	C1R
c03	PDGFRL
c03	ABCA8
c03	HSPB6
c03	NFIA
c03	CYBRD1
c03	ZFP36L2
c03	ABI3BP
c03	TXNIP
c03	OGN
c03	LAMA2
c03	MFAP4
c03	PLTP
c03	BOC
c03	FBLN5
c03	FXYD1
c03	MT1X
c03	ADD3
c03	SLIT3
c03	CST3
c03	PLPP3
c03	NFIB
c03	GLUL
c03	EPHX1
c03	RASD1
c03	TSHZ2
c03	GPX3
c03	PIK3R1
c03	MT-ND4L
c03	PLA2G2A
c03	APOE
c03	CD248
c03	C7
c03	CD34
c03	MYCBP2
c03	DCLK1
c03	LGALS3
c03	S100A13
c03	TCF7L2
c03	TNFAIP2
c03	OLFML3
c03	METTL7A
c03	LIMA1
c03	ANGPTL1
c03	MT-ATP8
c03	REV3L
c03	PLAC9
c03	HSPG2
c03	BICC1
c03	RGMA
c03	RUNX1T1
c03	PDK4
c03	SOD3
c03	SELENOP
c03	PID1
c03	PDGFRA
c03	TGFBR3
c03	SSPN
c03	TNXB
c03	CPXM1
c03	PRNP
c03	PSAP
c03	STEAP2
c03	MTRNR2L12
c03	EEF1G
c03	SMOC2
c03	PRELP
c03	CELF2
c03	FCGRT
c03	LSP1
c03	ZBTB20
c03	NEGR1
c03	ITIH5
c03	PLAGL1
c03	S100A6
c03	LAPTM4A
c03	AHNAK
c03	SPTBN1
c03	TMEM176A
c03	PLEKHH2
c03	GABARAP
c03	SAMHD1
c03	NFIX
c03	TWIST2
c03	ARL6IP5
c03	LTBP4
c03	IGFBP6
c03	TNFSF10
c03	CTSK
c03	EBF1
c03	STEAP1
c03	GSTM5
c03	CTSF
c03	GAS6
c03	SLIT2
c03	COLEC12
c03	SGCE
c03	GRINA
c03	IFITM1
c03	CILP
c03	COL14A1
c03	IFI16
c03	EMP1
c03	CYB5A
c03	PRRX1
c03	PLBD1
c03	LRRN4CL
c03	S100A10
c03	SCPEP1
c03	KRTCAP2
c03	CTSH
c03	WSB1
c03	PMP22
c03	DAB2
c03	PNISR
c03	MAFB
c03	SRSF5
c03	MAN1A1
c03	PCDH18
c03	IFNGR1
c03	PLSCR4
c03	TFPI
c03	ASPH
c03	LAMC1
c03	CPE
c03	PCOLCE
c03	PROS1
c03	TCF4
c03	KCTD12
c03	C1orf21
c03	MT-ND3
c03	LAMB1
c03	ATP6V0C
c03	RBMS3
c03	SERPINE2
c03	GAS1
c03	TGFBR2
c03	ISLR
c03	MT-ND6
c03	MT1M
c03	NFIC
c03	SEC62
c03	CHD9
c03	SH3BP5
c03	NPC2
c03	IL6ST
c03	CPQ
c03	SON
c03	FGFR1
c03	EGR1
c03	NUPR1
c03	ZFP36
c03	FSTL1
c03	ANXA1
c03	KLF4
c03	BDH2
c03	TSPAN4
c03	PRCP
c03	HSD17B11
c03	VAT1
c03	TSC22D3
c03	SCARA5
c03	ELN
c03	GPX4
c03	LGALS3BP
c03	TMX4
c03	TRIP10
c03	SNHG8
c03	FIBIN
c03	COL6A2
c03	PAM
c03	TRAM1
c03	SMARCA2
c03	LUM
c03	FOS
c03	MXRA8
c03	AZI2
c03	DPYSL2
c03	ITM2B
c03	MPZL1
c03	MBNL1
c03	ECM2
c03	N4BP2L2
c03	CPNE3
c04	MMP11
c04	COL11A1
c04	COL1A1
c04	CTHRC1
c04	COL10A1
c04	COL1A2
c04	COL12A1
c04	THBS2
c04	COL5A2
c04	POSTN
c04	COL3A1
c04	SDC1
c04	COL5A1
c04	AEBP1
c04	FN1
c04	SPARC
c04	MFAP2
c04	COL8A1
c04	MMP14
c04	SULF1
c04	VCAN
c04	COL6A3
c04	MXRA5
c04	SFRP2
c04	INHBA
c04	ASPN
c04	ANTXR1
c04	COMP
c04	LRRC15
c04	ADAM12
c04	GJB2
c04	COL6A1
c04	FNDC1
c04	CDH11
c04	CHPF
c04	CTSK
c04	MMP2
c04	CTSB
c04	IFI27
c04	ITGA11
c04	ATP5F1E
c04	RAB31
c04	FAP
c04	MYH9
c04	PLAU
c04	CNN2
c04	GRP
c04	DPYSL3
c04	ITGB5
c04	LGALS1
c04	HTRA3
c04	ISLR
c04	TIMP2
c04	CD99
c04	SULF2
c04	BGN
c04	MDK
c04	IFI6
c04	NREP
c04	CERCAM
c04	PXDN
c04	SERPINH1
c04	C1QTNF3
c04	FLNA
c04	FBN1
c04	COL8A2
c04	COL6A2
c04	MXRA8
c04	PTK7
c04	MT-ATP8
c04	SFRP4
c04	LOXL2
c04	KIAA1217
c04	MT-ND4L
c04	VMP1
c04	TMSB10
c04	RARRES2
c04	LOXL1
c04	GREM1
c04	MATN3
c04	NBL1
c04	CALU
c04	PALLD
c04	PRSS23
c04	ADAMTS2
c04	DIO2
c04	LOX
c04	TIMP3
c04	TPM4
c04	ACTB
c04	RUNX2
c04	PLXDC2
c04	HSPG2
c04	GJA1
c04	RCN3
c04	C4orf48
c04	PLEC
c04	CILP
c04	COL16A1
c04	UNC5B
c04	ITGBL1
c04	SELENOM
c04	CAVIN1
c04	LUM
c04	NRP2
c04	CMTM3
c04	TPM1
c04	CAVIN3
c04	P4HB
c04	F13A1
c04	PMEPA1
c04	ACTN1
c04	THY1
c04	GALNT1
c04	MIF
c04	PLPP4
c04	ELOB
c04	PTTG1IP
c04	NTM
c04	ARL4C
c04	SUGCT
c04	C1QTNF6
c04	S100A16
c04	MARCKS
c04	PDLIM7
c04	MRC2
c04	FIBIN
c04	PODNL1
c04	CREB3L1
c04	MICAL2
c04	KIF26B
c04	HDLBP
c04	THBS1
c04	ISG15
c04	RAI14
c04	FBLN2
c04	RTL8C
c04	SLC44A1
c04	MYDGF
c04	RUNX1
c04	OSTC
c04	SPOCK1
c04	ADAMTS12
c04	PLOD2
c04	IGFBP3
c04	HCFC1R1
c04	OLFML2B
c04	SPHK1
c04	IL32
c04	FKBP9
c04	TGFBI
c04	ITGB1
c04	NUAK1
c04	PPIC
c04	CKAP4
c04	SPATS2L
c04	FKBP10
c04	GXYLT2
c04	PCDH7
c04	FSCN1
c04	LTBP2
c04	PPIB
c04	SPON2
c04	MT-ND6
c04	S100A11
c04	GAS1
c04	SH3PXD2A
c04	RRBP1
c04	KDELR2
c04	GOLM1
c04	LY6E
c04	FBXO32
c04	HMCN1
c04	SERF2
c04	NOX4
c04	MARVELD1
c04	SLC16A3
c04	TAGLN
c04	LMO7
c04	PTGFRN
c04	PYCR1
c04	OST4
c04	CLEC11A
c04	EDIL3
c04	BMP1
c04	HTRA1
c04	TNFRSF12A
c04	PDLIM5
c04	SSR3
c04	PLAUR
c04	SLC6A6
c04	SPON1
c04	ATP5MC2
c04	SELENOW
c04	LRP1
c04	FZD1
c04	STMP1
c04	PRRX1
c04	PPFIBP1
c04	RIN2
c04	MAGED1
c04	P3H4
c04	GPX8
c04	CADM1
c04	ATP5ME
c04	PKM
c04	P3H1
c04	NME2
c04	PDGFC
c04	VGLL4
c04	P3H3
c04	FRMD6
c04	ATP5MF
c04	MTRNR2L12
c04	MT-CO2
c04	CLIC4
c04	MINDY2
c04	SMCO4
c04	SCARF2
c04	TCF4
c04	BNC2
c04	PLOD1
c04	SEC31A
c04	CTSZ
c04	GLIS2
c04	PERP
c04	ITGAV
c04	KDELR3
c04	CAPZB
c04	CDKN2A
c04	HEG1
c04	MYOF
c04	ARF4
c04	ENAH
c04	BEX3
c04	LMCD1
c04	GAPDH
c04	GPX7
c04	NCOR2
c04	FAM114A1
c04	ATP5MG
c04	DAP
c04	CFL1
c04	ZYX
c04	EFEMP2
c04	MSRB3
c04	C11orf24
c04	NID2
c04	ANKH
c04	SELENOH
c04	ALDH1B1
c04	TMEM158
c04	SH3PXD2B
c04	PLXNC1
c04	CD55
c04	CTNNB1
c04	GPC1
c04	METTL26
c04	FSTL1
c04	SEC24D
c04	PPDPF
c04	GLT8D2
c04	MT-ND3
c04	ITGA5
c04	PAM
c04	WNT2
c04	MT-ND5
c04	MYL6
c04	NORAD
c04	SRPX2
c04	STAT2
c04	PDGFRL
c04	ATP5MPL
c04	TTC3
c04	FLNB
c04	SLC39A13
c04	PRICKLE1
c04	ZNF469
c04	MYO1D
c04	RNF144A
c04	LMAN1
c04	MRPS6
c04	PDLIM2
c04	COL5A3
c04	SEC61A1
c04	ACTG1
c04	STAT1
c04	FOSL2
c04	COPS9
c04	C9orf16
c04	TMEM45A
c04	TPM2
c04	TSPO
c04	TMEM167A
c04	EMILIN1
c04	ATXN1
c04	SEM1
c04	CD276
c04	ATP5MC3
c04	CRABP2
c04	PODN
c04	FOXP1
c04	GLMP
c04	C19orf53
c04	TMED9
c04	ZFHX4
c04	ATP5PF
c04	TPST2
c04	A1BG
c04	ELN
c04	GABARAP
c04	CAPG
c04	TMED3
c04	WIPF1
c04	VOPP1
c04	GALNT10
c04	RPS27L
c04	ROR2
c04	SURF4
c04	P4HA1
c04	SEC61G
c04	ANGPTL2
c04	MYL12A
c04	PDPN
c04	RPL28
c04	SMYD3
c04	CASC4
c04	ZBED1
c04	PARVA
c04	PDLIM3
c04	PFN1
c04	COLGALT1
c04	C12orf75
c04	SGCD
c04	ATP5MD
c04	YIF1A
c04	COL15A1
c04	PLS3
c04	GAS6
c04	ATOX1
c04	FNDC3B
c04	ATP5MC1
c04	SEC23A
c04	TNC
c04	ARHGAP1
c04	SH3BGRL3
c04	P4HA3
c04	MT-ATP6
c04	NBDY
c04	MCRIP1
c04	REX1BD
c04	JTB
c04	SELENOF
c04	ETV1
c04	ABRACL
c04	COPZ2
c04	MAN2A1
c04	WNK1
c04	SOX4
c04	PTPN14
c04	C1orf198
c04	KIAA0930
c04	SGIP1
c04	ATP5PD
c04	NXN
c05	MFAP5
c05	CLEC3B
c05	IGFBP6
c05	CFD
c05	PI16
c05	GSN
c05	TNXB
c05	PCOLCE2
c05	EFEMP1
c05	S100A10
c05	FBN1
c05	SLPI
c05	PLA2G2A
c05	DCN
c05	FBLN2
c05	CCDC80
c05	CD55
c05	PLAC9
c05	CST3
c05	FSTL1
c05	MGST1
c05	FBLN1
c05	C1QTNF3
c05	CD248
c05	ACKR3
c05	SEMA3C
c05	SFRP4
c05	DPT
c05	ADH1B
c05	S100A4
c05	SCARA5
c05	PTGIS
c05	C3
c05	CD34
c05	TPPP3
c05	SH3BGRL3
c05	OGN
c05	MFAP4
c05	KLF4
c05	LTBP4
c05	S100A6
c05	GPNMB
c05	RARRES1
c05	ANXA2
c05	EMP3
c05	CHRDL1
c05	ANXA1
c05	CILP
c05	UAP1
c05	PDGFRL
c05	CADM3
c05	ITM2A
c05	OSR2
c05	TGFBR3
c05	FHL1
c05	CRIP1
c05	ABI3BP
c05	F10
c05	RAMP2
c05	PROCR
c05	SFRP2
c05	UGDH
c05	SERPINF1
c05	DBN1
c05	CLU
c05	LSP1
c05	LINC01133
c05	LRRN4CL
c05	ADAMTS5
c05	PODN
c05	CYBRD1
c05	HSPB6
c05	ELN
c05	ABLIM1
c05	LEPR
c05	PRELP
c05	AHNAK
c05	ADD3
c05	VAT1
c05	ZNF385A
c05	HTRA3
c05	HSD3B7
c05	MGP
c05	PAMR1
c05	DDAH2
c05	ISLR
c05	IGF2
c05	PIGT
c05	PRSS23
c05	S100A13
c05	PPIC
c05	ADAMTSL4
c05	PMP22
c05	CREB5
c05	REXO2
c05	AHNAK2
c05	CRABP2
c05	CELF2
c05	ANXA4
c05	C1R
c05	HIGD1A
c05	TRAC
c05	SDCBP
c05	PLPP3
c05	NOVA1
c05	OMD
c05	PTHLH
c05	ADM
c05	GPX4
c05	NT5E
c05	ZFP36
c05	SMIM14
c05	CD99
c05	RNASE4
c05	RHOB
c05	ARL6IP5
c05	HSPB8
c05	LIMA1
c05	SEMA3B
c05	EMP1
c05	ANGPTL2
c05	BIN1
c05	ANK2
c05	FCGRT
c05	AOX1
c05	AKR1C3
c05	OLFML3
c05	GPX3
c05	FGL2
c05	CDKN1A
c05	RNH1
c05	PCOLCE
c05	IGFBP5
c05	ZFP36L2
c05	C16orf89
c05	LGALS3
c05	GAS7
c05	GFPT2
c05	SDC2
c05	PAM
c05	SERPING1
c05	PPL
c05	SERPINE2
c05	SVEP1
c05	DCLK1
c05	ECM1
c05	GRN
c05	MMP23B
c05	TNFAIP2
c05	CPQ
c05	CBR3
c05	ANGPTL1
c05	MEDAG
c05	SLIT3
c05	PLTP
c05	MYC
c05	LMNA
c05	C1S
c05	RAB32
c05	PSAP
c05	FXYD1
c05	RHOA
c05	PLD3
c05	SFRP1
c05	NFIA
c05	MMP2
c05	TGFBR2
c05	CLTB
c05	GPRC5A
c05	LOXL1
c05	HEXB
c05	S100A11
c05	GYPC
c05	THBS3
c05	EBF1
c05	APP
c05	PLPP1
c05	TWIST2
c05	C17orf58
c05	LRP1
c05	ITIH5
c05	TIMP2
c05	SOD3
c05	PALM
c05	ADGRD1
c05	LDHA
c05	SPTBN1
c05	CLDN11
c05	CFH
c05	MYADM
c05	USP53
c05	PTGES
c05	GALNT15
c05	NFIB
c05	CD9
c05	RTN4
c05	DHRS3
c05	TPST1
c05	EEF1G
c05	ARL4D
c05	COL14A1
c05	TSPAN4
c05	ITM2B
c05	EMILIN2
c05	CTSH
c05	SSC5D
c05	PID1
c05	GAS1
c05	TRIP10
c05	CAB39L
c05	CTSF
c05	C1orf21
c05	GLIPR2
c05	GABARAP
c05	AP3S1
c05	ALDH1A3
c05	PLP2
c05	COL6A2
c05	NPC2
c05	SRPX
c05	OAF
c05	PXN
c05	ADAM33
c05	CES1
c05	NPDC1
c05	IL33
c05	CYB5A
c05	IGF1
c05	PLBD1
c05	OSR1
c05	PHGDH
c05	DUSP1
c05	UCHL1
c05	TSPO
c05	AKR1C2
c05	EGR1
c05	VGLL3
c05	LOX
c05	TRIOBP
c05	NPR1
c05	DPYSL2
c05	CAPN2
c05	C1QTNF2
c05	PCSK5
c05	GLUL
c05	TUBB2A
c05	SSPN
c05	ATP6V0C
c05	MRC2
c05	THY1
c05	TMSB4X
c05	NFIX
c05	TAGLN2
c05	RTN3
c05	CDC42EP2
c05	CTSK
c05	IGFBP4
c05	NFKBIZ
c05	CAPG
c05	CERCAM
c05	LUM
c05	RECK
c05	ITGB1BP1
c05	ECM2
c05	ADI1
c05	SH3BP5
c05	GSTP1
c05	ASPN
c05	QSOX1
c05	VASN
c05	IER3
c05	C12orf75
c05	CAST
c05	CALHM2
c05	NUCB2
c05	PIK3R1
c05	KLF3
c05	CUTC
c05	YWHAH
c05	SH3D19
c05	BLVRB
c05	TUBB6
c05	LY6E
c05	MAFF
c05	MYDGF
c05	OLFML1
c05	FYN
c05	FEZ1
c05	LRRC17
c05	FGFR1
c05	TUBB
c05	METRNL
c05	ATRAID
c05	FTL
c05	LAPTM4A
c05	PRDX4
c05	MAP1A
c05	NUPR1
c05	LAMP1
c05	HEXA
c05	CTSA
c05	SPRYD3
c05	APBB1IP
c05	GNB2
c05	SLC29A1
c05	LAMB2
c05	SVBP
c05	TRAM1
c05	SDF4
c05	TUBA1A
c05	DAB2
c05	SNX21
c05	ZYX
c05	BTG2
c05	GSTM5
c05	ARL2
c05	ITGBL1
c05	FAM114A1
c05	SESTD1
c05	DNAJB1
c05	CD47
c05	SOCS1
c05	FLRT2
c05	PXDC1
c05	UGP2
c05	FGF7
c05	METTL7A
c05	BAG2
c06	LIMCH1
c06	A2M
c06	MYH10
c06	ADH1B
c06	MACF1
c06	SCN7A
c06	FMO2
c06	DPT
c06	INMT
c06	PTGDS
c06	C7
c06	MFAP4
c06	DST
c06	MGP
c06	GSN
c06	FBLN1
c06	LTBP2
c06	GPC3
c06	SPARCL1
c06	PRELP
c06	LTBP4
c06	LAMB1
c06	RGCC
c06	LUM
c06	TGM2
c06	ALDH1A1
c06	APOD
c06	PLEKHH2
c06	LAMA2
c06	DCN
c06	FHL1
c06	CFH
c06	TCF21
c06	SLIT2
c06	ABI3BP
c06	TNXB
c06	C3
c06	OGN
c06	HSPB6
c06	CXCL12
c06	COL14A1
c06	SERPING1
c06	QSOX1
c06	SPTBN1
c06	PIK3R1
c06	CHRDL1
c06	CST3
c06	METTL7A
c06	PLTP
c06	IGFBP4
c06	SRPX
c06	SLC40A1
c06	SERPINF1
c06	FBLN5
c06	DKK3
c06	PLXDC2
c06	IGF1
c06	CD302
c06	EPB41L2
c06	C1S
c06	GPNMB
c06	CAMK2N1
c06	FXYD6
c06	ABCA6
c06	PODN
c06	SMARCA2
c06	G0S2
c06	OLFML3
c06	SPON1
c06	ARL6IP5
c06	CFD
c06	UACA
c06	MT-ND4L
c06	PMP22
c06	SAMHD1
c06	ALDH2
c06	ZNF106
c06	ITM2A
c06	COL15A1
c06	C1R
c06	MOXD1
c06	NPC2
c06	TSHZ2
c06	RARRES1
c06	EFEMP1
c06	FXYD1
c06	SPON2
c06	LTBP1
c06	PID1
c06	SVEP1
c06	ABCA8
c06	COLEC12
c06	CD74
c06	LRP1
c06	SSPN
c06	MGST1
c06	EPHX1
c06	PDGFRA
c06	RARRES2
c06	ANGPTL1
c06	PSAP
c06	CYBRD1
c06	NR2F1
c06	PRNP
c06	LGALS3
c06	MATN2
c06	ADD3
c06	NFIA
c06	ELN
c06	TFPI
c06	NFIX
c06	NFIB
c06	LBH
c06	GPX3
c06	BOC
c06	RNASE4
c06	MMP23B
c06	HTRA3
c06	STEAP2
c06	AKAP9
c06	PLPP3
c06	TSC22D3
c06	NBL1
c06	SFRP2
c06	CTSF
c06	PLEKHA5
c06	APLP2
c06	GOLIM4
c06	TCEAL4
c06	FIBIN
c06	PLD3
c06	ITIH5
c06	SOD3
c06	SH3D19
c06	PNISR
c06	RPS4Y1
c06	COL8A1
c06	SCPEP1
c06	CCDC80
c06	NUCKS1
c06	TACC1
c06	PPFIBP1
c06	MMP2
c06	DPYSL2
c06	F2R
c06	GSTM5
c06	TSPAN3
c06	SLIT3
c06	ECHDC2
c06	MRC2
c06	LAPTM4A
c06	NDRG2
c06	ENG
c06	RUNX1T1
c06	LITAF
c06	LAMA4
c06	PSIP1
c06	GYPC
c06	OLFML1
c06	APP
c06	TSPAN4
c06	ASPN
c06	LAMP1
c06	ISLR
c06	ITM2B
c06	NRP1
c06	RPL17
c06	MT-ATP8
c06	FGF7
c06	GAS6
c06	KCTD12
c06	CTSO
c06	TXNIP
c06	ADH5
c06	SGCE
c06	LTBP3
c06	LUC7L3
c06	ANTXR2
c06	FCGRT
c06	DAAM1
c06	LMO4
c06	PCOLCE
c06	PDGFRL
c06	PROS1
c06	ZFP36L2
c06	CDH11
c06	IL6ST
c06	PEBP1
c06	CPQ
c06	ZNF503
c06	COL6A3
c06	TMX4
c06	SPRY1
c06	LGALS3BP
c06	CREG1
c07	CXCL8
c07	CXCL3
c07	MMP3
c07	CXCL1
c07	CXCL2
c07	TNFAIP6
c07	AKR1C1
c07	IL6
c07	MMP10
c07	MMP12
c07	CTSL
c07	HMOX1
c07	PLIN2
c07	DDX21
c07	MEDAG
c07	TXN
c07	IL1RL1
c07	IER3
c07	SOD2
c07	MT2A
c07	PTGS2
c07	FOSL1
c07	WTAP
c07	SAT1
c07	CLMP
c07	PTX3
c07	NFKBIA
c07	PFDN2
c07	RAN
c07	THAP2
c07	LIF
c07	GEM
c07	KDM6B
c07	ATP1B3
c07	GSTO1
c07	GAL
c07	TAC1
c07	MT1A
c07	SLC3A2
c07	CYCS
c07	TOP1
c07	PLPP3
c07	TNFRSF12A
c07	ATP13A3
c07	ANXA5
c07	CD59
c07	SELENOS
c07	SPHK1
c07	TXNRD1
c07	AKR1C2
c07	SERPINE2
c07	ELOC
c07	SRGAP1
c07	RBM8A
c07	TUBA1C
c07	NOP16
c07	CD44
c07	EIF1AX
c07	VEGFA
c07	NOP56
c07	HSPD1
c07	NCL
c07	EIF4E
c07	CEBPB
c07	SNRPB
c07	HMGA1
c07	HSP90AB1
c07	BTG3
c07	RACK1
c07	TGIF1
c07	GNL3
c07	NPM1
c07	PDLIM4
c07	SNU13
c07	EIF3J
c07	ERRFI1
c07	IL1R1
c07	HNRNPAB
c07	EIF4A1
c07	SNRPD1
c07	ABL2
c07	HSPA9
c07	TFPI2
c07	CLEC2B
c07	YBX1
c07	CYTOR
c07	NIFK
c07	MTHFD2
c07	CMSS1
c07	CREM
c07	SELENOK
c07	TUBB4B
c07	PLAUR
c07	CHIC2
c07	PA2G4
c07	GCLM
c07	UAP1
c07	ADPRHL1
c07	ENO1
c07	SERPINE1
c07	GPATCH4
c07	FRMD4A
c07	PNO1
c07	FGFR1
c07	EIF2S2
c07	SERBP1
c07	GTPBP4
c07	MEG3
c07	EIF5B
c07	FTH1
c07	NINJ1
c07	NAMPT
c07	PAPPA
c07	RAB7A
c07	NFKB1
c07	GPRC5A
c07	EBNA1BP2
c07	CCT2
c07	SUB1
c07	DCAF13
c07	GSPT1
c07	MCL1
c07	S100A16
c07	WDR43
c07	PIM3
c07	DDX18
c07	HNRNPC
c07	PUM3
c07	ILF2
c07	TOMM40
c07	MAP4K4
c07	SQSTM1
c07	RND3
c07	COPS8
c07	BRIX1
c07	HSPE1
c07	PSMC4
c07	G3BP1
c07	ZNF593
c07	ATF4
c07	EIF1B
c07	TWIST2
c07	RNF149
c07	EIF5
c07	PRMT1
c07	PDPN
c07	ICAM1
c07	PEA15
c07	PRDX1
c07	GRPEL1
c07	FBL
c07	CCT5
c07	C1QBP
c07	LRRC59
c07	RPF2
c07	CREB5
c07	PRRX1
c07	ARSG
c07	MRTO4
c07	ATP5F1B
c07	RHEB
c07	FST
c07	REL
c07	XBP1
c07	C11orf96
c07	EDNRB
c07	AMD1
c07	DKC1
c07	MFSD2A
c07	RRP9
c07	PSMA7
c07	GNL2
c07	SNRPG
c07	SLC4A7
c07	APOD
c07	PNPLA8
c07	ARID5B
c07	SRSF7
c07	NOP58
c07	SET
c07	UBE2D3
c07	UBE2N
c07	EMP1
c07	METAP2
c07	BAZ1A
c07	RRP15
c07	YWHAE
c07	ATP5MD
c07	PSMD11
c07	CHCHD2
c07	BUD23
c07	EIF3A
c07	SLC25A5
c07	SPRY2
c07	MYC
c07	ITPRIP
c07	PPP1R15A
c07	SLC39A14
c07	EFNB2
c07	ADRM1
c07	RAB21
c07	UGDH
c07	PDE4B
c07	AK6
c07	SNRPE
c07	DDX39A
c07	SRM
c07	FAM180A
c07	RELB
c07	RAP1B
c07	EIF5A
c07	EIF2S1
c07	CEBPZ
c07	DNAJC2
c07	GFPT2
c07	NME1
c07	HNRNPU
c07	ZPR1
c07	RSL1D1
c07	ADAMTS4
c07	RPL36AL
c07	AKAP12
c07	PRELID1
c07	RANBP1
c07	UPP1
c07	RPL37A
c07	ELL2
c07	UTP11
c07	CCDC47
c07	IMP4
c07	PAK1IP1
c07	PNRC2
c07	PTPN1
c07	TRIR
c07	PTRH2
c07	RSL24D1
c07	LRRFIP1
c07	TNFAIP3
c07	BIRC3
c07	CCT3
c07	SRSF2
c07	CCL2
c07	SFPQ
c07	NIP7
c07	CCT8
c07	NOLC1
c07	RRS1
c07	ODC1
c07	ANGPTL4
c07	DNTTIP2
c07	RPL39
c07	UFM1
c07	CHMP4B
c07	DNAJB9
c07	NXT1
c07	ACSL4
c07	FNDC3A
c07	RSPO3
c07	NFKBIB
c07	NUDC
c07	RYBP
c07	GLA
c07	ATP1A1
c07	BAG1
c07	RPS29
c07	SDCBP
c07	KLHL21
c07	ETF1
c07	TCEAL9
c07	RPS17
c07	MRPL32
c07	PSMB7
c07	EIF1
c07	INHBA
c07	SNHG15
c07	NAA20
c07	SPAG9
c07	JAK1
c07	TCP1
c07	C8orf33
c07	NOP53
c07	PRRC2C
c07	HGF
c07	HNRNPM
c07	PDCD5
c07	EIF4A3
c07	RPL23
c07	TUBA1B
c07	LHFPL2
c07	MIR4435-2HG
c07	RPL7L1
c07	ZFAS1
c07	ZDHHC9
c07	TFAM
c07	BID
c07	IFRD2
c07	TIMM17A
c07	GLRX3
c07	POMP
c07	ABCF1
c07	COQ10B
c07	INSIG1
c07	RTRAF
[truncated: 4,031 more rows]
